# Supplementary material for: Evaluation of quantum chemistry calculation methods for conformational analysis of organic molecules using A-value estimation as a benchmark test
Source: Royal Society of Chemistry journal article supplement (doi:10.1039/d3ra06783a), 2023-01-01
Supplement: d3ra06783a21.pdf [file d3ra06783a21.pdf]

# Evaluation of Quantum Chemistry Calculation Methods for Conformational Analysis of Organic Molecules Using A-Value Estimation as a Benchmark Test

*Ken-ichi Yamada<sup>\*,†,‡</sup> and Tsubasa Inokuma,<sup>†,‡</sup>*

<sup>†</sup> Graduate School of Pharmaceutical Sciences, Tokushima University, Shomachi, Tokushima 770-8505,  
Japan. <sup>‡</sup> Research Cluster on “Key Material Development”, Tokushima University, Shomachi,  
Tokushima 770-8505, Japan.

yamak@tokushima-u.ac.jp

## Table of Contents

|                                                             |    |
|-------------------------------------------------------------|----|
| General.....                                                | 3  |
| Summary of the calculated A-value of each substituent ..... | 4  |
| Methylcyclohexane.....                                      | 9  |
| <i>tert</i> -Butylcyclohexane.....                          | 14 |
| Trifluoromethylcyclohexane.....                             | 19 |
| Cyclohexyltrimethylsilane .....                             | 24 |
| Cyclohexylethyne .....                                      | 29 |
| Cyclohexanecarbonitrile .....                               | 34 |
| Fluorocyclohexane.....                                      | 39 |
| Chlorocyclohexane .....                                     | 44 |
| Bromocyclohexane .....                                      | 49 |
| Iodocyclohexane .....                                       | 54 |
| Ethylcyclohexane.....                                       | 59 |
| Isopropylcyclohexane.....                                   | 65 |

|                                           |     |
|-------------------------------------------|-----|
| Cyclohexylethen .....                     | 71  |
| Cyclohexylbenzene .....                   | 77  |
| 1-Cyclohexylethanone .....                | 81  |
| Methoxycyclohexane .....                  | 86  |
| Cyclohexyl Acetate.....                   | 92  |
| <i>N,N</i> -Dimethylaminocyclohexane..... | 97  |
| Nitrocyclohexane .....                    | 103 |
| Methylthiocyclohexane.....                | 108 |
| References.....                           | 114 |

## General

The calculations were performed using the Gaussian 09W program,<sup>1</sup> except for those with the  $\omega$ B97X-V functional, for which the Spartan'18W program<sup>2</sup> was used. Conformational search were systematically performed by changing dihedral angles by 60° in initial geometries of axial and equatorial conformers. Geometry optimization was performed with the tight convergent criteria option. A larger grid (99,590) was applied to integral computation using the B3LYP, B3LYP-D3,  $\omega$ B97X-D, M06-2X, and  $\omega$ B97X-V functionals. For solvation correction with the Polarizable Continuum Model, the following parameters were used, except for *tert*-butylcyclohexane and cyclohexylethene (dichloromethane), 1-cyclohexylethanone and *N,N*-dimethylcyclohexanamine (toluene), and methylthiocyclohexane (chloroform), for which the solvent keywords are available:

methylcyclohexane, ethylcyclohexane, and isopropylcyclohexane (CFCl<sub>3</sub>/CDCl<sub>3</sub> 9:1)

eps=2.58422, epsinf=1.930, vmol=92.0159, density=0.0065468

trifluoromethylcyclohexane (CFCl<sub>3</sub>)

eps=2.38, epsinf=2.178576, vmol=93.1, density=0.006470565

cyclohexyltrimethylsilane (CDCl<sub>3</sub>/CD<sub>2</sub>Cl<sub>2</sub> 6:4)

eps=6.68416, epsinf=2.0655, vmol=72.8762, density=0.0082662

cyclohexylethyne, cyclohexanecarbonitrile, fluorocyclohexane, chlorocyclohexane, bromocyclohexane, iodocyclohexane, methoxycyclohexane, cyclohexyl acetate, nitrocyclohexane (CFCl<sub>3</sub>/TMS 19:1)

eps=2.368, epsinf=1.909, vmol=94.95, density=0.0063

cyclohexylbenzene (propane)

eps=1.6, epsinf=1.796, vmol=75.9, density=0.00793689

## Summary of the calculated A-value of each substituent

X = Me, *t*-Bu, CF<sub>3</sub>, TMS, C≡CH, CN, F, Cl, Br, I in Figures 1 and 2<sup>a</sup>

| methods <sup>b</sup>           | Me             | <i>t</i> -Bu   | CF <sub>3</sub> | TMS            | C≡CH           | CN              | F               | Cl             | Br <sup>c</sup> | I <sup>c</sup> | RMSE <sup>d</sup>     |
|--------------------------------|----------------|----------------|-----------------|----------------|----------------|-----------------|-----------------|----------------|-----------------|----------------|-----------------------|
| experimental values            | 1.74           | 4.9            | 2.5             | 2.50           | 0.515          | 0.21            | 0.36            | 0.507          | 0.485           | 0.490          |                       |
| B3LYP-D3//HF                   | 2.10<br>(2.11) | 5.39<br>(5.41) | 2.39<br>(2.30)  | 2.60<br>(2.63) | 0.87<br>(0.74) | 0.54<br>(0.37)  | 0.46<br>(0.29)  | 0.62<br>(0.49) | 0.55<br>(0.42)  | 0.51<br>(0.41) | <b>0.26</b><br>(0.23) |
| B3LYP-D3//B3LYP                | 2.03<br>(2.03) | 4.98<br>(5.00) | 2.43<br>(2.34)  | 2.28<br>(2.31) | 0.88<br>(0.75) | 0.54<br>(0.37)  | 0.45<br>(0.27)  | 0.56<br>(0.43) | 0.46<br>(0.33)  | 0.42<br>(0.32) | <b>0.20</b><br>(0.17) |
| B3LYP-D3//B3LYP-D3             | 2.07<br>(2.08) | 5.22<br>(5.24) | 2.54<br>(2.44)  | 2.58<br>(2.61) | 0.90<br>(0.76) | 0.57<br>(0.38)  | 0.49<br>(0.30)  | 0.60<br>(0.47) | 0.56<br>(0.43)  | 0.49<br>(0.39) | <b>0.23</b><br>(0.19) |
| B3LYP-D3//ωB97X-D              | 2.08<br>(2.08) | 6.27<br>(6.28) | 2.30<br>(2.20)  | 2.63<br>(2.65) | 0.88<br>(0.73) | 0.59<br>(0.39)  | 0.39<br>(0.21)  | 0.64<br>(0.50) | 0.51<br>(0.37)  | 0.49<br>(0.38) | <i>0.48</i><br>(0.48) |
| B3LYP-D3//M06-2X               | 2.07<br>(2.08) | 5.61<br>(5.62) | 2.60<br>(2.50)  | 3.40<br>(3.42) | 1.05<br>(0.89) | 0.70<br>(0.51)  | 0.67<br>(0.47)  | 0.66<br>(0.51) | 0.61<br>(0.47)  | 0.58<br>(0.46) | <i>0.46</i><br>(0.42) |
| B3LYP-D3//ωB97X-V <sup>e</sup> | 2.07<br>(2.08) | 5.68<br>(5.72) | 2.57<br>(2.39)  | 2.70<br>(2.76) | 1.05<br>(0.84) | 0.68<br>(0.44)  | 0.61<br>(0.36)  | 0.66<br>(0.47) | 0.52<br>(0.38)  | 0.54<br>(0.40) | <i>0.37</i><br>(0.32) |
| B3LYP-D3//MP2                  | 2.10<br>(2.10) | 5.78<br>(5.80) | 2.50<br>(2.40)  | 2.63<br>(2.65) | 1.21<br>(1.11) | 0.79<br>(0.58)  | 0.66<br>(0.47)  | 0.73<br>(0.58) | 0.67<br>(0.51)  | 0.67<br>(0.50) | <i>0.44</i><br>(0.38) |
| ωB97X-D//HF                    | 1.85<br>(1.85) | 5.05<br>(5.06) | 2.46<br>(2.38)  | 2.40<br>(2.42) | 0.54<br>(0.42) | 0.28<br>(0.13)  | 0.51<br>(0.36)  | 0.76<br>(0.64) | 0.77<br>(0.66)  | 0.75<br>(0.66) | <b>0.17</b><br>(0.12) |
| ωB97X-D//B3LYP                 | 1.77<br>(1.77) | 4.69<br>(4.70) | 2.54<br>(2.45)  | 2.08<br>(2.10) | 0.54<br>(0.41) | 0.26<br>(0.10)  | 0.52<br>(0.36)  | 0.71<br>(0.60) | 0.70<br>(0.59)  | 0.67<br>(0.59) | <b>0.19</b><br>(0.16) |
| ωB97X-D//B3LYP-D3              | 1.80<br>(1.81) | 4.85<br>(4.86) | 2.68<br>(2.59)  | 2.30<br>(2.32) | 0.55<br>(0.41) | 0.27<br>(0.10)  | 0.58<br>(0.40)  | 0.78<br>(0.65) | 0.83<br>(0.72)  | 0.77<br>(0.69) | <b>0.20</b><br>(0.14) |
| ωB97X-D//ωB97X-D               | 1.80<br>(1.80) | 5.82<br>(5.83) | 2.43<br>(2.34)  | 2.24<br>(2.26) | 0.52<br>(0.37) | 0.29<br>(0.11)  | 0.47<br>(0.30)  | 0.80<br>(0.67) | 0.77<br>(0.64)  | 0.74<br>(0.65) | <i>0.34</i><br>(0.33) |
| ωB97X-D//M06-2X                | 1.78<br>(1.79) | 5.15<br>(5.16) | 2.77<br>(2.68)  | 2.92<br>(2.94) | 0.67<br>(0.51) | 0.39<br>(0.21)  | 0.79<br>(0.60)  | 0.83<br>(0.70) | 0.87<br>(0.73)  | 0.82<br>(0.72) | <i>0.30</i><br>(0.22) |
| ωB97X-D//ωB97X-V <sup>e</sup>  | 1.80<br>(1.82) | 5.25<br>(5.28) | 2.71<br>(2.54)  | 2.34<br>(2.38) | 0.67<br>(0.47) | 0.35<br>(0.15)  | 0.69<br>(0.48)  | 0.81<br>(0.65) | 0.74<br>(0.65)  | 0.77<br>(0.65) | <b>0.24</b><br>(0.16) |
| ωB97X-D//MP2                   | 1.81<br>(1.81) | 5.37<br>(5.39) | 2.64<br>(2.55)  | 2.26<br>(2.28) | 0.87<br>(0.71) | 0.44<br>(0.24)  | 0.75<br>(0.55)  | 0.87<br>(0.73) | 0.88<br>(0.74)  | 0.83<br>(0.72) | <i>0.32</i><br>(0.23) |
| M06-2X//HF                     | 2.00<br>(2.00) | 5.44<br>(5.45) | 2.51<br>(2.43)  | 2.68<br>(2.69) | 0.42<br>(0.30) | 0.14<br>(-0.01) | 0.27<br>(0.12)  | 0.51<br>(0.39) | 0.49<br>(0.38)  | 0.50<br>(0.41) | <b>0.20</b><br>(0.24) |
| M06-2X//B3LYP                  | 1.90<br>(1.90) | 5.14<br>(5.16) | 2.52<br>(2.43)  | 2.44<br>(2.46) | 0.38<br>(0.25) | 0.09<br>(-0.07) | 0.27<br>(0.11)  | 0.45<br>(0.33) | 0.41<br>(0.29)  | 0.38<br>(0.30) | <b>0.12</b><br>(0.20) |
| M06-2X//B3LYP-D3               | 1.92<br>(1.92) | 5.21<br>(5.23) | 2.62<br>(2.53)  | 2.53<br>(2.55) | 0.37<br>(0.23) | 0.08<br>(-0.10) | 0.28<br>(0.11)  | 0.47<br>(0.35) | 0.49<br>(0.37)  | 0.42<br>(0.34) | <b>0.14</b><br>(0.21) |
| M06-2X//ωB97X-D                | 1.91<br>(1.91) | 6.10<br>(6.11) | 2.39<br>(2.30)  | 2.34<br>(2.35) | 0.32<br>(0.18) | 0.06<br>(-0.12) | 0.23<br>(0.06)  | 0.50<br>(0.38) | 0.43<br>(0.31)  | 0.41<br>(0.31) | <i>0.40</i><br>(0.44) |
| M06-2X//M06-2X                 | 1.88<br>(1.88) | 5.42<br>(5.43) | 2.66<br>(2.56)  | 2.86<br>(2.87) | 0.44<br>(0.29) | 0.16<br>(-0.02) | 0.42<br>(0.24)  | 0.47<br>(0.33) | 0.46<br>(0.33)  | 0.40<br>(0.30) | <b>0.22</b><br>(0.26) |
| M06-2X//ωB97X-V <sup>e</sup>   | 1.89<br>(1.91) | 5.54<br>(5.57) | 2.65<br>(2.48)  | 2.45<br>(2.49) | 0.46<br>(0.26) | 0.11<br>(-0.10) | 0.37<br>(0.17)  | 0.48<br>(0.32) | 0.40<br>(0.30)  | 0.37<br>(0.25) | <b>0.22</b><br>(0.28) |
| M06-2X//MP2                    | 1.92<br>(1.92) | 5.69<br>(5.71) | 2.58<br>(2.49)  | 2.37<br>(2.38) | 0.63<br>(0.48) | 0.15<br>(-0.04) | 0.42<br>(0.22)  | 0.51<br>(0.37) | 0.49<br>(0.35)  | 0.43<br>(0.32) | <b>0.27</b><br>(0.29) |
| ωB97X-V//HF                    | 1.96<br>(1.97) | 5.48<br>(5.51) | 2.45<br>(2.31)  | 2.36<br>(2.41) | 0.53<br>(0.38) | 0.19<br>(0.03)  | 0.25<br>(0.05)  | 0.56<br>(0.43) | 0.57<br>(0.45)  | 0.54<br>(0.43) | <b>0.21</b><br>(0.25) |
| ωB97X-V//B3LYP <sup>e</sup>    | 1.91<br>(1.93) | 5.07<br>(5.09) | 2.49<br>(2.36)  | 2.04<br>(2.08) | 0.50<br>(0.34) | 0.14<br>(-0.03) | 0.19<br>(-0.01) | 0.49<br>(0.33) | 0.48<br>(0.34)  | 0.43<br>(0.32) | <b>0.18</b><br>(0.24) |
| ωB97X-V//B3LYP-D3 <sup>e</sup> | 1.96<br>(1.98) | 5.43<br>(5.45) | 2.67<br>(2.51)  | 1.88<br>(1.94) | 0.52<br>(0.34) | 0.16<br>(-0.03) | 0.27<br>(0.05)  | 0.55<br>(0.41) | 0.56<br>(0.40)  | 0.51<br>(0.38) | <b>0.28</b><br>(0.30) |
| ωB97X-V//ωB97X-D <sup>e</sup>  | 2.03<br>(2.05) | 6.26<br>(6.30) | 2.48<br>(2.32)  | 2.77<br>(2.81) | 0.50<br>(0.30) | 0.15<br>(-0.04) | 0.19<br>(0.00)  | 0.53<br>(0.38) | 0.52<br>(0.39)  | 0.44<br>(0.34) | <i>0.45</i><br>(0.50) |
| ωB97X-V//M06-2X <sup>e</sup>   | 1.95<br>(1.97) | 5.60<br>(5.64) | 2.66<br>(2.49)  | 3.07<br>(3.10) | 0.60<br>(0.39) | 0.24<br>(0.02)  | 0.37<br>(0.15)  | 0.50<br>(0.34) | 0.47<br>(0.32)  | 0.44<br>(0.33) | <i>0.30</i><br>(0.34) |
| ωB97X-V//ωB97X-V <sup>e</sup>  | 1.95<br>(1.97) | 5.65<br>(5.68) | 2.59<br>(2.43)  | 2.62<br>(2.66) | 0.58<br>(0.38) | 0.22<br>(0.02)  | 0.37<br>(0.16)  | 0.57<br>(0.41) | 0.56<br>(0.42)  | 0.50<br>(0.39) | <b>0.25</b><br>(0.28) |

|                                      |                |                |                |                |                 |                  |                |                |                |                |                       |
|--------------------------------------|----------------|----------------|----------------|----------------|-----------------|------------------|----------------|----------------|----------------|----------------|-----------------------|
| $\omega$ B97X-V//MP2 <sup>e</sup>    | 1.91<br>(1.93) | 5.74<br>(5.78) | 2.62<br>(2.45) | 2.64<br>(2.69) | 0.84<br>(0.63)  | 0.30<br>(0.08)   | 0.45<br>(0.22) | 0.61<br>(0.44) | 0.61<br>(0.45) | 0.56<br>(0.43) | 0.32<br>(0.30)        |
| MP2//HF                              | 2.03<br>(2.03) | 5.53<br>(5.55) | 2.68<br>(2.60) | 2.76<br>(2.78) | 0.25<br>(0.14)  | 0.09<br>(-0.06)  | 0.33<br>(0.17) | 0.77<br>(0.64) | 0.70<br>(0.57) | 0.79<br>(0.80) | 0.31<br>(0.31)        |
| MP2//B3LYP                           | 1.92<br>(1.92) | 5.15<br>(5.18) | 2.69<br>(2.60) | 2.44<br>(2.47) | 0.18<br>(0.06)  | 0.02<br>(-0.14)  | 0.34<br>(0.17) | 0.72<br>(0.60) | 0.62<br>(0.49) | 0.78<br>(0.68) | <b>0.21</b><br>(0.23) |
| MP2//B3LYP-D3                        | 1.94<br>(1.94) | 5.27<br>(5.30) | 2.79<br>(2.69) | 2.63<br>(2.65) | 0.14<br>(0.01)  | -0.01<br>(-0.18) | 0.35<br>(0.17) | 0.73<br>(0.60) | 0.69<br>(0.55) | 0.83<br>(0.72) | <b>0.26</b><br>(0.28) |
| MP2// $\omega$ B97X-D                | 1.93<br>(1.93) | 6.22<br>(6.24) | 2.58<br>(2.49) | 2.53<br>(2.55) | 0.07<br>(-0.06) | -0.04<br>(-0.21) | 0.30<br>(0.13) | 0.75<br>(0.61) | 0.60<br>(0.46) | 0.75<br>(0.64) | 0.47<br>(0.51)        |
| MP2/M06-2X                           | 1.89<br>(1.89) | 5.53<br>(5.55) | 2.84<br>(2.77) | 3.13<br>(3.15) | 0.15<br>(0.01)  | 0.05<br>(-0.12)  | 0.51<br>(0.31) | 0.68<br>(0.54) | 0.57<br>(0.43) | 0.69<br>(0.57) | 0.34<br>(0.36)        |
| MP2// $\omega$ B97X-V <sup>e,f</sup> | 1.95<br>(1.96) | 5.68<br>(5.70) | 2.78<br>(2.68) | 2.84<br>(2.66) | 0.15<br>(0.01)  | -0.01<br>(-0.27) | 0.40<br>(0.21) | 0.65<br>(0.51) | 0.51<br>(0.37) | 0.65<br>(0.54) | 0.31<br>(0.35)        |
| MP2//MP2                             | 1.93<br>(1.93) | 5.80<br>(5.82) | 2.79<br>(2.69) | 2.53<br>(2.55) | 0.31<br>(0.17)  | 0.01<br>(-0.18)  | 0.52<br>(0.31) | 0.71<br>(0.56) | 0.56<br>(0.41) | 0.61<br>(0.56) | 0.33<br>(0.35)        |
| RMSE <sup>d</sup>                    | 0.22<br>(0.22) | 0.70<br>(0.72) | 0.16<br>(0.13) | 0.31<br>(0.31) | 0.28<br>(0.30)  | 0.23<br>(0.25)   | 0.17<br>(0.19) | 0.17<br>(0.12) | 0.16<br>(0.13) | 0.18<br>(0.16) |                       |
| solvation effect <sup>g</sup>        | 0.00           | 0.02           | 0.11           | 0.03           | 0.15            | 0.18             | 0.19           | 0.14           | 0.13           | 0.11           |                       |

<sup>a</sup> The values are A-values (kcal/mol) calculated with solvation correction of the Polarizable Continuum Model, while those in parentheses were calculated without solvation correction. <sup>b</sup> Performed using Gaussian 09W program unless otherwise noted. Methods on the left and right of double slash are for energy calculation with 6-311+G(2df,2p) basis set and geometry optimization with 6-31G\* basis set, respectively. <sup>c</sup> LANL2DZ and def2-TZVPD were used for geometry optimization and energy calculations in places of 6-31G\* and 6-311+G(2df,2p), respectively, for bromine and iodine atoms unless otherwise noted. <sup>d</sup> Root means squared error from the experimental values in kcal/mol. The values in parentheses were those without solvation correction. <sup>e</sup> Performed using Spartan 18W program with 6-31G\* basis set for geometry optimization and frequency calculations, except for an iodine atom, for which LANL2DZ basis set was used, and with 6-311+G(2df,2p) for energy calculations. <sup>f</sup> Energy calculation was performed using Gaussian 09W program. <sup>g</sup> Average absolute differences between A-values with and without solvation correction (kcal/mol).

X = Et, *i*-Pr, vinyl, Ph, Ac, MeO, AcO, Me<sub>2</sub>N, NO<sub>2</sub>, MeS in Figure 3-M-S<sup>a</sup>

| methods <sup>b</sup>           | Et             | <i>i</i> -Pr   | vinyl          | Ph             | Ac             | MeO            | AcO            | Me <sub>2</sub> N | NO <sub>2</sub> | MeS            | RMSE <sup>c</sup> |
|--------------------------------|----------------|----------------|----------------|----------------|----------------|----------------|----------------|-------------------|-----------------|----------------|-------------------|
| experimental values            | 1.79           | 2.21           | 1.68           | 2.7            | 1.21           | 0.75           | 0.785          | 1.35              | 1.13            | 1.00           |                   |
| B3LYP-D3//HF                   | 2.00<br>(2.01) | 2.40<br>(2.41) | 2.04<br>(1.99) | 3.16<br>(3.14) | 1.80<br>(1.60) | 0.73<br>(0.52) | 0.61<br>(0.56) | 2.03<br>(1.86)    | 0.88<br>(0.64)  | 1.37<br>(1.16) | 0.33<br>(0.30)    |
| B3LYP-D3//B3LYP                | 2.00<br>(2.01) | 2.29<br>(2.30) | 1.99<br>(1.94) | 3.11<br>(3.09) | 1.76<br>(1.55) | 0.68<br>(0.46) | 0.61<br>(0.55) | 1.88<br>(1.69)    | 0.78<br>(0.53)  | 1.31<br>(1.10) | 0.28<br>(0.27)    |
| B3LYP-D3//B3LYP-D3             | 2.00<br>(2.01) | 2.07<br>(2.08) | 2.03<br>(1.97) | 2.95<br>(2.93) | 1.87<br>(1.64) | 0.72<br>(0.50) | 0.64<br>(0.58) | 1.99<br>(1.77)    | 1.13<br>(0.88)  | 1.36<br>(1.14) | 0.30<br>(0.25)    |
| ωB97X-D//HF                    | 1.76<br>(1.77) | 2.11<br>(2.11) | 1.76<br>(1.71) | 2.79<br>(2.77) | 1.56<br>(1.36) | 0.73<br>(0.52) | 0.64<br>(0.58) | 1.83<br>(1.65)    | 0.81<br>(0.60)  | 1.50<br>(1.31) | 0.23<br>(0.21)    |
| ωB97X-D//B3LYP                 | 1.75<br>(1.76) | 1.99<br>(2.00) | 1.70<br>(1.65) | 2.71<br>(2.69) | 1.50<br>(1.29) | 0.69<br>(0.48) | 0.65<br>(0.59) | 1.66<br>(1.45)    | 0.42<br>(0.48)  | 1.45<br>(1.26) | 0.22<br>(0.23)    |
| ωB97X-D//B3LYP-D3              | 1.73<br>(1.73) | 1.74<br>(1.75) | 1.73<br>(1.6=) | 2.55<br>(2.52) | 1.60<br>(1.37) | 0.72<br>(0.49) | 0.70<br>(0.64) | 1.78<br>(1.55)    | 1.10<br>(0.87)  | 1.51<br>(1.31) | 0.25<br>(0.22)    |
| ωB97X-D//ωB97X-V <sup>d</sup>  | 1.71<br>(1.74) | 2.01<br>(2.04) | 1.74<br>(1.69) | 2.95<br>(2.89) | 1.80<br>(1.53) | 0.97<br>(0.66) | 0.84<br>(0.75) | 2.01<br>(1.67)    | 2.17<br>(1.92)  | 1.55<br>(1.29) | 0.38<br>(0.28)    |
| M06-2X//HF                     | 1.93<br>(1.94) | 2.16<br>(2.17) | 1.83<br>(1.78) | 2.78<br>(2.76) | 1.28<br>(1.08) | 0.55<br>(0.35) | 0.57<br>(0.51) | 1.37<br>(1.19)    | 0.39<br>(0.16)  | 1.18<br>(1.00) | 0.24<br>(0.29)    |
| M06-2X//B3LYP                  | 1.92<br>(1.92) | 2.04<br>(2.05) | 1.76<br>(1.70) | 2.66<br>(2.63) | 1.19<br>(0.99) | 0.51<br>(0.30) | 0.56<br>(0.49) | 1.22<br>(1.02)    | 0.23<br>(0.01)  | 1.11<br>(0.93) | 0.24<br>(0.31)    |
| M06-2X//B3LYP-D3               | 1.85<br>(1.86) | 1.78<br>(1.78) | 1.76<br>(1.70) | 2.48<br>(2.46) | 1.21<br>(0.99) | 0.43<br>(0.21) | 0.57<br>(0.50) | 1.30<br>(1.07)    | 0.52<br>(0.28)  | 1.16<br>(0.97) | 0.22<br>(0.29)    |
| M06-2X//M06-2X                 | 1.97<br>(1.97) | 2.06<br>(2.07) | 1.80<br>(1.73) | 2.60<br>(2.56) | 1.37<br>(1.14) | 0.61<br>(0.39) | 0.64<br>(0.56) | 1.46<br>(1.22)    | 1.71<br>(1.45)  | 0.89<br>(0.66) | 0.22<br>(0.22)    |
| M06-2X//ωB97X-V <sup>d</sup>   | 1.83<br>(1.85) | 2.01<br>(2.04) | 1.76<br>(1.70) | 2.74<br>(2.69) | 1.41<br>(1.14) | 0.62<br>(0.33) | 0.68<br>(0.59) | 1.46<br>(1.12)    | 1.68<br>(1.41)  | 1.15<br>(0.90) | 0.22<br>(0.21)    |
| M06-2X//MP2                    | 1.85<br>(1.85) | 2.15<br>(2.15) | 1.84<br>(1.76) | 2.71<br>(2.67) | 1.33<br>(1.09) | 0.63<br>(0.40) | 0.66<br>(0.58) | 1.52<br>(1.27)    | 1.07<br>(0.81)  | 1.09<br>(0.87) | 0.20<br>(0.23)    |
| ωB97X-V//HF <sup>d</sup>       | 1.89<br>(1.92) | 2.11<br>(2.14) | 1.82<br>(1.79) | 2.99<br>(2.96) | 1.57<br>(1.34) | 0.56<br>(0.60) | 0.46<br>(0.39) | 1.55<br>(1.32)    | 0.55<br>(0.38)  | 1.27<br>(1.06) | 0.25<br>(0.27)    |
| ωB97X-V//B3LYP <sup>d</sup>    | 1.84<br>(1.87) | 2.07<br>(2.08) | 1.47<br>(1.44) | 2.90<br>(2.86) | 1.44<br>(1.21) | 0.56<br>(0.29) | 0.49<br>(0.41) | 1.36<br>(1.11)    | 0.37<br>(0.19)  | 1.16<br>(0.95) | 0.24<br>(0.29)    |
| ωB97X-V//B3LYP-D3 <sup>d</sup> | 1.84<br>(1.87) | 1.78<br>(1.82) | 1.81<br>(1.78) | 2.74<br>(2.69) | 1.55<br>(1.31) | 0.56<br>(0.27) | 0.55<br>(0.47) | 1.14<br>(0.81)    | 1.62<br>(1.38)  | 1.23<br>(1.00) | 0.26<br>(0.29)    |
| ωB97X-V//ωB97X-V <sup>d</sup>  | 1.88<br>(1.90) | 2.13<br>(2.16) | 1.82<br>(1.78) | 3.00<br>(2.96) | 1.69<br>(1.43) | 0.73<br>(0.43) | 0.62<br>(0.52) | 1.69<br>(1.35)    | 1.87<br>(1.62)  | 1.24<br>(0.98) | 0.30<br>(0.24)    |
| MP2//B3LYP                     | 1.87<br>(1.88) | 1.89<br>(1.90) | 1.76<br>(1.71) | 2.80<br>(2.77) | 1.46<br>(1.28) | 0.39<br>(0.16) | 0.40<br>(0.33) | 0.83<br>(0.60)    | 0.79<br>(0.56)  | 1.22<br>(1.02) | 0.26<br>(0.32)    |
| MP2//B3LYP-D3                  | 1.82<br>(1.82) | 1.62<br>(1.63) | 1.76<br>(1.71) | 2.57<br>(2.54) | 1.48<br>(1.28) | 0.34<br>(0.11) | 0.39<br>(0.32) | 0.96<br>(0.69)    | 1.05<br>(0.82)  | 1.25<br>(1.03) | 0.29<br>(0.33)    |
| RMSE <sup>c</sup>              | 0.12<br>(0.12) | 0.27<br>(0.25) | 0.17<br>(0.14) | 0.21<br>(0.20) | 0.37<br>(0.21) | 0.19<br>(0.40) | 0.22<br>(0.28) | 0.38<br>(0.36)    | 0.55<br>(0.63)  | 0.31<br>(0.17) |                   |
| solvation effect <sup>e</sup>  | 0.01           | 0.01           | 0.05           | 0.03           | 0.22           | 0.24           | 0.07           | 0.24              | 0.23            | 0.21           |                   |

<sup>a</sup> The values are A-values (kcal/mol) calculated with solvation correction of the polarizable continuum model, while those in parentheses were calculated without solvation correction. <sup>b</sup> Performed using Gaussian 09W unless otherwise noted. Methods on the left and right of double slash are for energy calculation with 6-311+G(2df,2p) basis set and geometry optimization/frequency calculations with 6-31G\*, respectively. <sup>c</sup> Root means squared error from the experimental values (kcal/mol) of the results in Tables 1 and 2. The values in parentheses are those without solvation correction. <sup>d</sup> Performed using Spartan 18W program. <sup>e</sup> Average absolute differences between A-values with and without solvation correction (kcal/mol).

X = Me, *t*-Bu, CF<sub>3</sub>, TMS, C≡CH, CN, F, Cl, Br, I in Figure 3-T<sup>a</sup>

| theoretical levels            | Me             | <i>t</i> -Bu   | CF <sub>3</sub> | TMS            | C≡CH           | CN             | F               | Cl             | Br <sup>b</sup> | I <sup>b</sup> | RMSE <sup>c</sup> |
|-------------------------------|----------------|----------------|-----------------|----------------|----------------|----------------|-----------------|----------------|-----------------|----------------|-------------------|
| experimental values           | 1.74           | 4.9            | 2.5             | 2.50           | 0.515          | 0.21           | 0.36            | 0.507          | 0.485           | 0.490          |                   |
| HF//HF                        | 2.56<br>(2.56) | 6.71<br>(6.73) | 3.33<br>(3.23)  | 3.88<br>(3.91) | 1.38<br>(1.24) | 1.00<br>(0.81) | 0.55<br>(0.037) | 1.29<br>(1.15) | 1.41<br>(1.28)  | 1.61<br>(1.50) | 1.03<br>(0.97)    |
| HF//B3LYP                     | 2.56<br>(2.56) | 6.40<br>(6.42) | 3.51<br>(3.40)  | 3.66<br>(3.70) | 1.43<br>(1.29) | 1.02<br>(0.83) | 0.56<br>(0.37)  | 1.25<br>(1.12) | 1.36<br>(1.23)  | 1.57<br>(1.47) | 0.96<br>(0.90)    |
| HF//B3LYP-D3                  | 2.71<br>(2.71) | 6.73<br>(6.76) | 3.70<br>(3.59)  | 4.01<br>(4.03) | 1.51<br>(1.34) | 1.08<br>(0.86) | 0.62<br>(0.42)  | 1.35<br>(1.21) | 1.53<br>(1.39)  | 1.69<br>(1.59) | 1.14<br>(1.08)    |
| HF//ωB97X-D                   | 2.73<br>(2.73) | 7.79<br>(7.81) | 3.41<br>(3.30)  | 4.13<br>(4.15) | 1.52<br>(1.35) | 1.14<br>(0.92) | 0.48<br>(0.29)  | 1.36<br>(1.21) | 1.45<br>(1.31)  | 1.66<br>(1.55) | 1.33<br>(1.28)    |
| HF//M06-2X                    | 2.75<br>(2.76) | 7.18<br>(7.20) | 3.83<br>(3.71)  | 5.00<br>(5.02) | 1.76<br>(1.58) | 1.26<br>(1.04) | 0.81<br>(0.59)  | 1.45<br>(1.29) | 1.62<br>(1.46)  | 1.83<br>(1.71) | 1.45<br>(1.38)    |
| HF//ωB97X-V                   | 2.78<br>(2.78) | 7.20<br>(7.22) | 3.67<br>(3.55)  | 4.22<br>(4.24) | 1.67<br>(1.49) | 1.25<br>(1.02) | 0.69<br>(0.48)  | 1.37<br>(1.21) | 1.51<br>(1.35)  | 1.75<br>(1.63) | 1.29<br>(1.21)    |
| HF//MP2                       | 2.76<br>(2.76) | 7.29<br>(7.31) | 3.66<br>(3.54)  | 4.14<br>(4.16) | 1.96<br>(1.78) | 1.40<br>(1.16) | 0.76<br>(0.53)  | 1.49<br>(1.31) | 1.65<br>(1.48)  | 1.85<br>(1.72) | 1.36<br>(1.28)    |
| B3LYP//HF                     | 2.46<br>(2.46) | 6.00<br>(6.02) | 2.89<br>(2.80)  | 3.45<br>(3.47) | 1.24<br>(1.11) | 0.89<br>(0.72) | 0.62<br>(0.45)  | 1.15<br>(1.02) | 1.26<br>(1.14)  | 1.33<br>(1.23) | 0.75<br>(0.68)    |
| B3LYP//B3LYP                  | 2.46<br>(2.46) | 5.57<br>(5.58) | 3.00<br>(2.91)  | 3.12<br>(3.15) | 1.27<br>(1.14) | 0.91<br>(0.74) | 0.63<br>(0.45)  | 1.11<br>(0.98) | 1.21<br>(1.08)  | 1.27<br>(1.17) | 0.65<br>(0.57)    |
| B3LYP//B3LYP-D3               | 2.52<br>(2.52) | 5.93<br>(5.95) | 3.17<br>(3.07)  | 3.49<br>(3.52) | 1.32<br>(1.13) | 0.96<br>(0.76) | 0.70<br>(0.51)  | 1.19<br>(1.05) | 1.34<br>(1.20)  | 1.35<br>(1.25) | 0.80<br>(0.72)    |
| B3LYP//ωB97X-D                | 2.53<br>(2.53) | 7.03<br>(7.04) | 2.90<br>(2.80)  | 3.62<br>(3.64) | 1.31<br>(1.16) | 0.98<br>(0.79) | 0.57<br>(0.39)  | 1.20<br>(1.06) | 1.26<br>(1.12)  | 1.33<br>(1.22) | 0.98<br>(0.93)    |
| B3LYP//M06-2X                 | 2.53<br>(2.53) | 6.37<br>(6.39) | 3.26<br>(3.15)  | 4.46<br>(4.48) | 1.50<br>(1.34) | 1.09<br>(0.90) | 0.90<br>(0.70)  | 1.26<br>(1.11) | 1.39<br>(1.25)  | 1.44<br>(1.32) | 1.07<br>(1.00)    |
| B3LYP//ωB97X-V                | 2.57<br>(2.57) | 6.44<br>(6.46) | 3.11<br>(3.01)  | 3.71<br>(3.73) | 1.44<br>(1.28) | 1.07<br>(0.87) | 0.78<br>(0.58)  | 1.19<br>(1.04) | 1.30<br>(1.15)  | 1.38<br>(1.27) | 0.93<br>(0.85)    |
| B3LYP//MP2                    | 2.55<br>(2.55) | 6.50<br>(6.52) | 3.11<br>(3.00)  | 3.61<br>(3.63) | 1.69<br>(1.54) | 1.20<br>(0.98) | 0.88<br>(0.66)  | 1.32<br>(1.17) | 1.44<br>(1.29)  | 1.49<br>(1.36) | 1.00<br>(0.92)    |
| RMSE <sup>c</sup>             | 0.87<br>(0.87) | 1.85<br>(1.87) | 0.88<br>(0.78)  | 1.47<br>(1.49) | 1.00<br>(0.85) | 0.89<br>(0.69) | 0.35<br>(0.17)  | 0.78<br>(0.64) | 0.93<br>(0.79)  | 1.07<br>(0.96) |                   |
| solvation effect <sup>d</sup> | 0.00           | 0.02           | 0.11            | 0.02           | 0.16           | 0.20           | 0.20            | 0.15           | 0.14            | 0.11           |                   |

<sup>a</sup> The values are A-values (kcal/mol) calculated with solvation correction of the polarizable continuum model, while those in parentheses were calculated without solvation correction. The calculations were performed using Gaussian 09W program except for those with ωB97X-V, which was performed using Spartan 18W program. <sup>b</sup> Except for ωB97X-V, def2-TZVPD basis set was used for bromine and iodine atoms.

<sup>c</sup> Root means squared error from the experimental values (kcal/mol). The values in parentheses are those without solvation correction. <sup>d</sup> Average absolute differences between A-values with and without solvation correction (kcal/mol).

X = Et, *i*-Pr, vinyl, Ph, Ac, MeO, AcO, Me<sub>2</sub>N, NO<sub>2</sub>, MeS in Figure 3-T<sup>a</sup>

| theoretical levels            | Et             | <i>i</i> -Pr   | vinyl          | Ph             | Ac             | MeO            | AcO            | Me <sub>2</sub> N | NO <sub>2</sub> | MeS            | RMSE <sup>b</sup> |
|-------------------------------|----------------|----------------|----------------|----------------|----------------|----------------|----------------|-------------------|-----------------|----------------|-------------------|
| experimental values           | 1.79           | 2.21           | 1.68           | 2.7            | 1.21           | 0.75           | 0.785          | 1.35              | 1.13            | 1.00           |                   |
| HF//HF                        | 2.71<br>(2.72) | 3.27<br>(3.28) | 2.66<br>(2.62) | 4.55<br>(4.52) | 2.71<br>(2.48) | 1.11<br>(0.88) | 1.05<br>(0.99) | 3.09<br>(2.90)    | 2.09<br>(1.84)  | 2.13<br>(1.90) | 1.11<br>(1.06)    |
| HF//B3LYP                     | 2.75<br>(2.76) | 3.19<br>(3.20) | 2.64<br>(2.61) | 4.58<br>(4.55) | 2.69<br>(2.45) | 1.08<br>(0.84) | 1.05<br>(0.98) | 2.89<br>(2.68)    | 1.93<br>(1.69)  | 2.14<br>(1.91) | 1.06<br>(1.00)    |
| HF//B3LYP-D3                  | 2.81<br>(2.82) | 3.04<br>(3.06) | 2.70<br>(2.67) | 4.50<br>(4.58) | 2.94<br>(2.68) | 1.27<br>(1.02) | 1.18<br>(1.12) | 3.09<br>(2.85)    | 2.42<br>(2.17)  | 2.24<br>(2.00) | 1.20<br>(1.13)    |
| HF//ωB97X-D                   | 2.83<br>(2.84) | 3.41<br>(3.43) | 2.78<br>(2.41) | 4.69<br>(4.65) | 3.07<br>(2.82) | 1.48<br>(1.24) | 1.14<br>(1.07) | 2.89<br>(2.64)    | 2.79<br>(2.53)  | 2.16<br>(1.92) | 1.34<br>(1.28)    |
| HF//M06-2X                    | 3.18<br>(3.19) | 3.50<br>(3.52) | 2.78<br>(2.75) | 5.06<br>(5.02) | 3.30<br>(3.03) | 1.78<br>(1.53) | 1.30<br>(1.23) | 3.50<br>(3.24)    | 3.59<br>(3.30)  | 2.02<br>(1.75) | 1.56<br>(1.49)    |
| HF//ωB97X-V                   | 2.89<br>(2.90) | 3.40<br>(3.42) | 2.75<br>(2.72) | 5.14<br>(5.10) | 3.15<br>(2.89) | 1.50<br>(1.24) | 1.30<br>(1.23) | 3.31<br>(3.05)    | 3.45<br>(3.16)  | 2.27<br>(2.01) | 1.44<br>(1.37)    |
| HF//MP2                       | 2.91<br>(2.92) | 3.56<br>(3.57) | 2.86<br>(2.72) | 4.98<br>(4.94) | 3.21<br>(2.92) | 1.58<br>(1.32) | 1.33<br>(1.24) | 3.56<br>(3.29)    | 3.09<br>(2.81)  | 2.26<br>(1.99) | 1.48<br>(1.40)    |
| B3LYP//HF                     | 2.49<br>(2.50) | 2.98<br>(2.99) | 2.49<br>(2.45) | 3.87<br>(3.85) | 2.52<br>(2.32) | 1.13<br>(0.92) | 1.09<br>(1.03) | 2.66<br>(2.48)    | 1.55<br>(1.31)  | 1.86<br>(1.66) | 0.81<br>(0.76)    |
| B3LYP//B3LYP                  | 2.50<br>(2.51) | 2.87<br>(2.88) | 2.46<br>(2.42) | 3.85<br>(3.83) | 2.49<br>(2.29) | 1.09<br>(0.87) | 1.08<br>(1.02) | 2.49<br>(2.30)    | 1.44<br>(1.20)  | 1.84<br>(1.64) | 0.74<br>(0.69)    |
| B3LYP//B3LYP-D3               | 2.56<br>(2.56) | 2.72<br>(2.73) | 2.51<br>(2.47) | 3.73<br>(3.71) | 2.71<br>(2.49) | 1.26<br>(1.04) | 1.22<br>(1.15) | 2.72<br>(2.50)    | 1.92<br>(1.66)  | 1.91<br>(1.69) | 0.87<br>(0.80)    |
| B3LYP//ωB97X-D                | 2.56<br>(2.57) | 3.07<br>(3.08) | 2.58<br>(2.54) | 3.89<br>(3.87) | 2.82<br>(2.62) | 1.47<br>(1.26) | 1.45<br>(1.39) | 2.44<br>(2.22)    | 2.28<br>(2.02)  | 1.84<br>(1.62) | 1.00<br>(0.94)    |
| B3LYP//M06-2X                 | 2.87<br>(2.87) | 3.14<br>(3.15) | 2.57<br>(2.53) | 4.23<br>(4.20) | 3.02<br>(2.79) | 1.18<br>(0.92) | 1.31<br>(1.25) | 3.03<br>(2.80)    | 3.07<br>(2.80)  | 1.70<br>(1.45) | 1.17<br>(1.10)    |
| B3LYP//ωB97X-V                | 2.60<br>(2.61) | 3.05<br>(3.07) | 2.54<br>(2.50) | 4.33<br>(4.30) | 2.89<br>(2.67) | 1.48<br>(1.25) | 1.33<br>(1.26) | 2.87<br>(2.64)    | 2.95<br>(2.68)  | 1.92<br>(1.69) | 1.08<br>(1.01)    |
| B3LYP//MP2                    | 2.63<br>(2.64) | 3.20<br>(3.21) | 2.64<br>(2.59) | 4.08<br>(4.05) | 2.94<br>(2.70) | 1.58<br>(1.34) | 1.37<br>(1.29) | 3.10<br>(2.85)    | 2.58<br>(2.31)  | 1.91<br>(1.67) | 1.11<br>(1.03)    |
| RMSE <sup>b</sup>             | 0.96<br>(0.97) | 0.99<br>(1.00) | 0.97<br>(0.93) | 1.75<br>(1.72) | 1.70<br>(1.46) | 0.64<br>(0.42) | 0.46<br>(0.40) | 1.66<br>(1.43)    | 1.53<br>(1.29)  | 1.03<br>(0.80) |                   |
| solvation effect <sup>c</sup> | 0.01           | 0.01           | 0.04           | 0.03           | 0.24           | 0.24           | 0.07           | 0.23              | 0.26            | 0.24           |                   |

<sup>a</sup> The values are A-values (kcal/mol) calculated with solvation correction of the polarizable continuum model, while those in parentheses were calculated without solvation correction. The calculations were performed using Gaussian 09W program except for those with ωB97X-V, which was performed using Spartan 18W program. <sup>b</sup> Root means squared error from the experimental values (kcal/mol) of the results in Tables 3 and 4. The values in parentheses are those without solvation correction. <sup>c</sup> Average absolute differences between A-values with and without solvation correction (kcal/mol).



## Methylcyclohexane

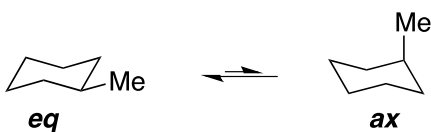

| geometry method        | $E$ (au)    | Thermal correction to Gibbs Free Energy (au/Particle) |  |  |  |
|------------------------|-------------|-------------------------------------------------------|--|--|--|
| <b>eq</b> RHF/6-31G(d) | -273.243663 | 0.182015                                              |  |  |  |
| <b>ax</b> RHF/6-31G(d) | -273.239998 | 0.182435                                              |  |  |  |

  

| energy method                               | $E$ (au)    | $G$ (au)    | rel $G$ (kcal/mol) | Population % | A-value (kcal/mol) |
|---------------------------------------------|-------------|-------------|--------------------|--------------|--------------------|
| <b>eq</b> RB3LYP-D3/6-311+G(2df,2p)         | -275.302925 | -275.120910 | 0                  | 97.2         | 2.10               |
| <b>ax</b> RB3LYP-D3/6-311+G(2df,2p)         | -275.299992 | -275.117556 | 2.1048             | 2.8          |                    |
| <b>eq</b> R $\omega$ B97X-D/6-311+G(2df,2p) | -275.201489 | -275.019474 | 0                  | 95.8         | 1.85               |
| <b>ax</b> R $\omega$ B97X-D/6-311+G(2df,2p) | -275.198962 | -275.016527 | 1.850              | 4.2          |                    |
| <b>eq</b> RM06-2X/6-311+G(2df,2p)           | -275.138560 | -274.956545 | 0                  | 96.7         | 2.00               |
| <b>ax</b> RM06-2X /6-311+G(2df,2p)          | -275.135797 | -274.953361 | 1.998              | 3.3          |                    |
| <b>eq</b> RMP2(FC)/6-311+G(2df,2p)          | -274.523347 | -274.341332 | 0                  | 96.9         | 2.03               |
| <b>ax</b> RMP2(FC)/6-311+G(2df,2p)          | -274.520535 | -274.338099 | 2.028              | 3.1          |                    |

  

| geometry method      | $E$ (au)    | Thermal correction to Gibbs Free Energy (au/Particle) |  |  |  |
|----------------------|-------------|-------------------------------------------------------|--|--|--|
| <b>eq</b> RHF/6-31G* | -273.243664 | 0.181801                                              |  |  |  |
| <b>ax</b> RHF/6-31G* | -273.239998 | 0.182184                                              |  |  |  |

  

| energy method                               | $E$ (au)    | $G$ (au)    | rel $G$ (kcal/mol) | Population % | A-value (kcal/mol) |
|---------------------------------------------|-------------|-------------|--------------------|--------------|--------------------|
| <b>eq</b> R $\omega$ B97X-V/6-311+G(2df,2p) | -275.208102 | -275.026301 | 0                  | 96.5         | 1.96               |
| <b>ax</b> R $\omega$ B97X-V/6-311+G(2df,2p) | -275.205367 | -275.023183 | 1.957              | 3.5          |                    |

  

| geometry method           | $E$ (au)    | Thermal correction to Gibbs Free Energy (au/Particle) |  |  |  |
|---------------------------|-------------|-------------------------------------------------------|--|--|--|
| <b>eq</b> RB3LYP/6-31G(d) | -275.195637 | 0.168624                                              |  |  |  |
| <b>ax</b> RB3LYP/6-31G(d) | -275.192113 | 0.168938                                              |  |  |  |

  

| energy method                               | $E$ (au)    | $G$ (au)    | rel $G$ (kcal/mol) | Population % | A-value (kcal/mol) |
|---------------------------------------------|-------------|-------------|--------------------|--------------|--------------------|
| <b>eq</b> RB3LYP-D3/6-311+G(2df,2p)         | -275.302896 | -275.134272 | 0                  | 96.9         | 2.03               |
| <b>ax</b> RB3LYP-D3/6-311+G(2df,2p)         | -275.299978 | -275.131039 | 2.029              | 3.1          |                    |
| <b>eq</b> R $\omega$ B97X-D/6-311+G(2df,2p) | -275.201197 | -275.032573 | 0                  | 95.2         | 1.77               |
| <b>ax</b> R $\omega$ B97X-D/6-311+G(2df,2p) | -275.198697 | -275.029759 | 1.765              | 4.8          |                    |

|                                     |               |                                                       |                         |              |                    |
|-------------------------------------|---------------|-------------------------------------------------------|-------------------------|--------------|--------------------|
| <b>eq</b> RM06-2X/6-311+G(2df,2p)   | -275.138200   | -274.969576                                           | 0                       | 96.1         |                    |
| <b>ax</b> RM06-2X /6-311+G(2df,2p)  | -275.135490   | -274.966552                                           | 1.897                   | 3.9          | 1.90               |
| <b>eq</b> RMP2(FC)/6-311+G(2df,2p)  | -274.522738   | -274.354114                                           | 0                       | 96.2         |                    |
| <b>ax</b> RMP2(FC)/6-311+G(2df,2p)  | -274.519998   | -274.351060                                           | 1.916                   | 3.7          | 1.92               |
| geometry method                     | <i>E</i> (au) | Thermal correction to Gibbs Free Energy (au/Particle) |                         |              |                    |
| <b>eq</b> RB3LYP/6-31G*             | -275.195622   | 0.158471                                              |                         |              |                    |
| <b>ax</b> RB3LYP/6-31G*             | -275.192127   | 0.158823                                              |                         |              |                    |
| energy method                       | <i>E</i> (au) | <i>G</i> (au)                                         | rel <i>G</i> (kcal/mol) | Population % | A-value (kcal/mol) |
| <b>eq</b> RωB97X-V/6-311+G(2df,2p)  | -275.208495   | -275.050024                                           | 0                       | 96.2         |                    |
| <b>ax</b> RωB97X-V/6-311+G(2df,2p)  | -275.205801   | -275.046978                                           | 1.911                   | 3.8          | 1.91               |
| geometry method                     | <i>E</i> (au) | Thermal correction to Gibbs Free Energy (au/Particle) |                         |              |                    |
| <b>eq</b> RB3LYP-D3/6-31G(d)        | -275.212368   | 0.169314                                              |                         |              |                    |
| <b>ax</b> RB3LYP-D3/6-31G(d)        | -275.209542   | 0.169709                                              |                         |              |                    |
| energy method                       | <i>E</i> (au) | <i>G</i> (au)                                         | rel <i>G</i> (kcal/mol) | Population % | A-value (kcal/mol) |
| <b>eq</b> RB3LYP-D3/6-311+G(2df,2p) | -275.302938   | -275.133624                                           | 0                       | 97.1         |                    |
| <b>ax</b> RB3LYP-D3/6-311+G(2df,2p) | -275.300027   | -275.130318                                           | 2.074                   | 2.9          | 2.07               |
| <b>eq</b> RωB97X-D/6-311+G(2df,2p)  | -275.201274   | -275.031960                                           | 0                       | 95.5         |                    |
| <b>ax</b> RωB97X-D/6-311+G(2df,2p)  | -275.198795   | -275.029085                                           | 1.804                   | 4.5          | 1.80               |
| <b>eq</b> RM06-2X/6-311+G(2df,2p)   | -275.138333   | -274.969019                                           | 0                       | 96.3         |                    |
| <b>ax</b> RM06-2X /6-311+G(2df,2p)  | -275.135667   | -274.965957                                           | 1.921                   | 3.7          | 1.92               |
| <b>eq</b> RMP2(FC)/6-311+G(2df,2p)  | -274.522915   | -274.353601                                           | 0                       | 96.4         |                    |
| <b>ax</b> RMP2(FC)/6-311+G(2df,2p)  | -274.520219   | -274.350510                                           | 1.940                   | 3.6          | 1.94               |
| geometry method                     | <i>E</i> (au) | Thermal correction to Gibbs Free Energy (au/Particle) |                         |              |                    |
| <b>eq</b> RB3LYP-D3/6-31G*          | -275.212353   | 0.169052                                              |                         |              |                    |
| <b>ax</b> RB3LYP-D3/6-31G*          | -275.209555   | 0.169505                                              |                         |              |                    |
| energy method                       | <i>E</i> (au) | <i>G</i> (au)                                         | rel <i>G</i> (kcal/mol) | Population % | A-value (kcal/mol) |
| <b>eq</b> RωB97X-V/6-311+G(2df,2p)  | -275.208588   | -275.039536                                           | 0                       | 96.5         |                    |
| <b>ax</b> RωB97X-V/6-311+G(2df,2p)  | -275.205916   | -275.036411                                           | 1.960                   | 3.5          | 1.96               |
| geometry method                     | <i>E</i> (au) | Thermal correction to Gibbs Free Energy (au/Particle) |                         |              |                    |
| <b>eq</b> RωB97X-D/6-31G(d)         | -275.118975   | 0.170847                                              |                         |              |                    |

ax RωB97X-D/6-31G(d)      -275.116562      0.171237

| energy method                       | E (au)      | G (au)      | rel G (kcal/mol) | Population % | A-value (kcal/mol) |
|-------------------------------------|-------------|-------------|------------------|--------------|--------------------|
| <b>eq</b> RB3LYP-D3/6-311+G(2df,2p) | -275.303082 | -275.132235 | 0                | 97.1         | 2.08               |
| <b>ax</b> RB3LYP-D3/6-311+G(2df,2p) | -275.300158 | -275.128921 | 2.079            | 2.9          |                    |
| <b>eq</b> RωB97X-D/6-311+G(2df,2p)  | -275.201621 | -275.030773 | 0                | 95.5         | 1.80               |
| <b>ax</b> RωB97X-D/6-311+G(2df,2p)  | -275.199143 | -275.027906 | 1.799            | 4.5          |                    |
| <b>eq</b> RM06-2X/6-311+G(2df,2p)   | -275.138699 | -274.967851 | 0                | 96.2         | 1.91               |
| <b>ax</b> RM06-2X /6-311+G(2df,2p)  | -275.136043 | -274.964806 | 1.911            | 3.8          |                    |
| <b>eq</b> RMP2(FC)/6-311+G(2df,2p)  | -274.523401 | -274.352554 | 0                | 96.3         | 1.93               |
| <b>ax</b> RMP2(FC)/6-311+G(2df,2p)  | -274.520723 | -274.349485 | 1.925            | 3.7          |                    |

| geometry method           | E (au)      | Thermal correction to Gibbs Free Energy (au/Particle) |
|---------------------------|-------------|-------------------------------------------------------|
| <b>eq</b> RωB97X-D/6-31G* | -275.118965 | 0.158500                                              |
| <b>ax</b> RωB97X-D/6-31G* | -275.116573 | 0.159060                                              |

| energy method                      | E (au)      | G (au)      | rel G (kcal/mol) | Population % | A-value (kcal/mol) |
|------------------------------------|-------------|-------------|------------------|--------------|--------------------|
| <b>eq</b> RωB97X-V/6-311+G(2df,2p) | -275.208788 | -275.050288 | 0                | 96.9         | 2.03               |
| <b>ax</b> RωB97X-V/6-311+G(2df,2p) | -275.206120 | -275.047060 | 2.026            | 3.1          |                    |

| geometry method            | E (au)      | Thermal correction to Gibbs Free Energy (au/Particle) |
|----------------------------|-------------|-------------------------------------------------------|
| <b>eq</b> RM06-2X/6-31G(d) | -275.047823 | 0.170500                                              |
| <b>ax</b> RM06-2X/6-31G(d) | -275.045200 | 0.170849                                              |

| energy method                       | E (au)      | G (au)      | rel G (kcal/mol) | Population % | A-value (kcal/mol) |
|-------------------------------------|-------------|-------------|------------------|--------------|--------------------|
| <b>eq</b> RB3LYP-D3/6-311+G(2df,2p) | -275.303052 | -275.132553 | 0                | 97.1         | 2.07               |
| <b>ax</b> RB3LYP-D3/6-311+G(2df,2p) | -275.300097 | -275.129249 | 2.073            | 2.9          |                    |
| <b>eq</b> RωB97X-D/6-311+G(2df,2p)  | -275.201660 | -275.031160 | 0                | 95.3         | 1.78               |
| <b>ax</b> RωB97X-D/6-311+G(2df,2p)  | -275.199168 | -275.028320 | 1.782            | 4.7          |                    |
| <b>eq</b> RM06-2X/6-311+G(2df,2p)   | -275.138804 | -274.968305 | 0                | 96.0         | 1.88               |
| <b>ax</b> RM06-2X /6-311+G(2df,2p)  | -275.136160 | -274.965311 | 1.879            | 4.0          |                    |
| <b>eq</b> RMP2(FC)/6-311+G(2df,2p)  | -274.523579 | -274.353079 | 0                | 96.1         | 1.89               |
| <b>ax</b> RMP2(FC)/6-311+G(2df,2p)  | -274.520920 | -274.350071 | 1.887            | 3.9          |                    |

| geometry method          | E (au)      | Thermal correction to Gibbs Free Energy (au/Particle) |
|--------------------------|-------------|-------------------------------------------------------|
| <b>eq</b> RM06-2X/6-31G* | -275.047827 | 0.170162                                              |

**ax** RM06-2X/6-31G\*      -275.045254      0.170594

| energy method                      | <i>E</i> (au) | <i>G</i> (au) | rel <i>G</i> (kcal/mol) | Population % | A-value (kcal/mol) |
|------------------------------------|---------------|---------------|-------------------------|--------------|--------------------|
| <b>eq</b> RωB97X-V/6-311+G(2df,2p) | -275.208811   | -275.038649   | 0                       | 96.4         | 1.95               |
| <b>ax</b> RωB97X-V/6-311+G(2df,2p) | -275.206135   | -275.035541   | 1.950                   | 3.6          |                    |

| geometry method           | <i>E</i> (au) | Thermal correction to Gibbs Free Energy (au/Particle) |
|---------------------------|---------------|-------------------------------------------------------|
| <b>eq</b> RωB97X-V/6-31G* | -275.124825   | 0.170593                                              |
| <b>ax</b> RωB97X-V/6-31G* | -275.122289   | 0.171027                                              |

| energy method                       | <i>E</i> (au) | <i>G</i> (au) | rel <i>G</i> (kcal/mol) | Population % | A-value (kcal/mol) |
|-------------------------------------|---------------|---------------|-------------------------|--------------|--------------------|
| <b>eq</b> RB3LYP-D3/6-311+G(2df,2p) | -275.303254   | -275.132661   | 0                       | 97.1         | 2.07               |
| <b>ax</b> RB3LYP-D3/6-311+G(2df,2p) | -275.300389   | -275.129362   | 2.070                   | 2.9          |                    |
| <b>eq</b> RωB97X-D/6-311+G(2df,2p)  | -275.201739   | -275.031146   | 0                       | 95.5         | 1.80               |
| <b>ax</b> RωB97X-D/6-311+G(2df,2p)  | -275.199308   | -275.028281   | 1.798                   | 4.5          |                    |
| <b>eq</b> RM06-2X/6-311+G(2df,2p)   | -275.138868   | -274.968275   | 0                       | 96.1         | 1.89               |
| <b>ax</b> RM06-2X /6-311+G(2df,2p)  | -275.136288   | -274.965261   | 1.891                   | 3.9          |                    |
| <b>eq</b> RωB97X-V/6-311+G(2df,2p)  | -275.208629   | -275.038036   | 0                       | 96.4         | 1.95               |
| <b>ax</b> RωB97X-V/6-311+G(2df,2p)  | -275.205961   | -275.034934   | 1.947                   | 3.5          |                    |
| <b>eq</b> RMP2(FC)/6-311+G(2df,2p)  | -274.523611   | -274.353018   | 0                       | 96.5         | 1.95               |
| <b>ax</b> RMP2(FC)/6-311+G(2df,2p)  | -274.520936   | -274.349909   | 1.951                   | 3.5          |                    |

| geometry method             | <i>E</i> (au) | Thermal correction to Gibbs Free Energy (au/Particle) |
|-----------------------------|---------------|-------------------------------------------------------|
| <b>eq</b> RMP2(FC)/6-31G(d) | -274.161772   | 0.173212                                              |
| <b>ax</b> RMP2(FC)/6-31G(d) | -274.158747   | 0.173611                                              |

| energy method                       | <i>E</i> (au) | <i>G</i> (au) | rel <i>G</i> (kcal/mol) | Population % | A-value (kcal/mol) |
|-------------------------------------|---------------|---------------|-------------------------|--------------|--------------------|
| <b>eq</b> RB3LYP-D3/6-311+G(2df,2p) | -275.303029   | -275.129817   | 0                       | 97.2         | 2.10               |
| <b>ax</b> RB3LYP-D3/6-311+G(2df,2p) | -275.300082   | -275.126471   | 2.100                   | 2.8          |                    |
| <b>eq</b> RωB97X-D/6-311+G(2df,2p)  | -275.201689   | -275.028477   | 0                       | 95.6         | 1.81               |
| <b>ax</b> RωB97X-D/6-311+G(2df,2p)  | -275.199201   | -275.025590   | 1.812                   | 4.4          |                    |
| <b>eq</b> RM06-2X/6-311+G(2df,2p)   | -275.138808   | -274.956596   | 0                       | 96.3         | 1.92               |
| <b>ax</b> RM06-2X /6-311+G(2df,2p)  | -275.136148   | -274.962537   | 1.920                   | 3.7          |                    |
| <b>eq</b> RMP2(FC)/6-311+G(2df,2p)  | -274.523611   | -274.350399   | 0                       | 96.3         | 1.93               |
| <b>ax</b> RMP2(FC)/6-311+G(2df,2p)  | -274.520936   | -274.347325   | 1.929                   | 3.7          |                    |

| geometry method           | $E$ (au)    | Thermal correction to Gibbs Free Energy (au/Particle) |  |  |  |
|---------------------------|-------------|-------------------------------------------------------|--|--|--|
| <b>eq</b> RMP2(FC)/6-31G* | -274.161772 | 0.173008                                              |  |  |  |
| <b>ax</b> RMP2(FC)/6-31G* | -274.158747 | 0.173371                                              |  |  |  |

  

| energy method                               | $E$ (au)    | $G$ (au)    | rel $G$ (kcal/mol) | Population % | A-value (kcal/mol) |
|---------------------------------------------|-------------|-------------|--------------------|--------------|--------------------|
| <b>eq</b> R $\omega$ B97X-V/6-311+G(2df,2p) | -275.208800 | -275.035792 | 0                  | 96.2         | 1.91               |
| <b>ax</b> R $\omega$ B97X-V/6-311+G(2df,2p) | -275.206123 | -275.032752 | 1.908              | 3.8          |                    |

  

| geometry method                          | $E$ (au)    | $G$ (au)    | rel $G$ (kcal/mol) | Population % | A-value (kcal/mol) |
|------------------------------------------|-------------|-------------|--------------------|--------------|--------------------|
| <b>eq</b> RHF/6-311+G(d,p)               | -273.309789 | -273.130797 | 0                  | 98.8         | 2.62               |
| <b>ax</b> RHF/6-311+G(d,p)               | -273.306066 | -273.126569 | 2.615              | 1.2          |                    |
| <b>eq</b> RB3LYP/6-311+G(d,p)            | -275.270822 | -275.104498 | 0                  | 98.4         | 2.43               |
| <b>ax</b> RB3LYP/6-311+G(d,p)            | -275.267357 | -275.100628 | 2.428              | 1.6          |                    |
| <b>eq</b> RB3LYP-D3/6-311+G(d,p)         | -275.287551 | -275.120523 | 0                  | 97.0         | 2.05               |
| <b>ax</b> RB3LYP-D3/6-311+G(d,p)         | -275.284782 | -275.117261 | 2.047              | 3.0          |                    |
| <b>eq</b> R $\omega$ B97X-D/6-311+G(d,p) | -275.187083 | -275.018650 | 0                  | 95.3         | 1.78               |
| <b>ax</b> R $\omega$ B97X-D/6-311+G(d,p) | -275.184754 | -275.015812 | 1.781              | 4.7          |                    |
| <b>eq</b> RM06-2X/6-311+G(d,p)           | -275.123401 | -274.954877 | 0                  | 95.7         | 1.83               |
| <b>ax</b> RM06-2X/6-311+G(d,p)           | -275.120900 | -274.951955 | 1.834              | 4.3          |                    |
| <b>eq</b> R $\omega$ B97X-V/6-311+G**    | -275.195371 | -275.027542 | 0                  | 96.1         | 1.89               |
| <b>ax</b> R $\omega$ B97X-V/6-311+G**    | -275.192862 | -275.024538 | 1.885              | 3.9          |                    |
| <b>eq</b> RMP2(FC)/6-311+G(d,p)          | -274.370782 | -274.201564 | 0                  | 96.8         | 2.02               |
| <b>ax</b> RMP2(FC)/6-311+G(d,p)          | -274.368089 | -274.198348 | 2.018              | 3.2          |                    |

*tert*-Butylcyclohexane

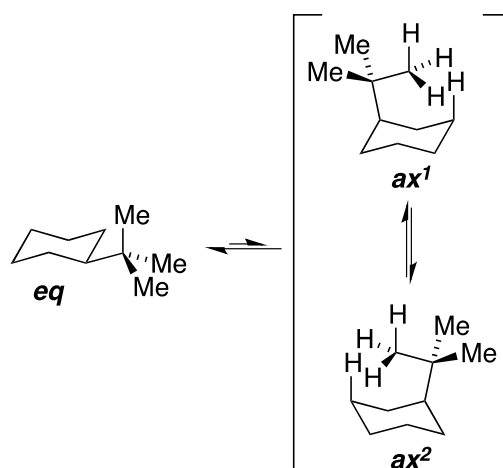

| geometry method        | $E$ (au)    | Thermal correction to Gibbs Free Energy (au/Particle) |
|------------------------|-------------|-------------------------------------------------------|
| <b>eq</b> RHF/6-31G(d) | -390.337398 | 0.267681                                              |
| <b>ax</b> RHF/6-31G(d) | -390.327630 | 0.269276                                              |

| energy method                               | $E$ (au)    | $G$ (au)    | rel $G$ (kcal/mol) | Population % | A-value (kcal/mol) |
|---------------------------------------------|-------------|-------------|--------------------|--------------|--------------------|
| <b>eq</b> RB3LYP-D3/6-311+G(2df,2p)         | -393.288454 | -393.020773 | 0                  | 100.0        | 100.0              |
| <b>ax</b> RB3LYP-D3/6-311+G(2df,2p)         | -393.280809 | -393.011533 | 5.798              | 0.005        | 0.01               |
| <b>eq</b> R $\omega$ B97X-D/6-311+G(2df,2p) | -393.144859 | -392.877178 | 0                  | 100.0        | 100.0              |
| <b>ax</b> R $\omega$ B97X-D/6-311+G(2df,2p) | -393.137756 | -392.868480 | 5.458              | 0.01         | 0.02               |
| <b>eq</b> RM06-2X/6-311+G(2df,2p)           | -393.055552 | -392.787871 | 0                  | 100.0        | 100.0              |
| <b>ax</b> RM06-2X /6-311+G(2df,2p)          | -393.047832 | -392.778557 | 5.845              | 0.005        | 0.01               |
| <b>eq</b> RMP2(FC)/6-311+G(2df,2p)          | -392.179467 | -391.911787 | 0                  | 100.0        | 100.0              |
| <b>ax</b> RMP2(FC)/6-311+G(2df,2p)          | -392.171594 | -391.902318 | 5.942              | 0.004        | 0.009              |

| geometry method      | $E$ (au)    | Thermal correction to Gibbs Free Energy (au/Particle) |
|----------------------|-------------|-------------------------------------------------------|
| <b>eq</b> RHF/6-31G* | -390.337397 | 0.266888                                              |
| <b>ax</b> RHF/6-31G* | -390.327630 | 0.268597                                              |

| energy method                               | $E$ (au)    | $G$ (au)    | rel $G$ (kcal/mol) | Population % | A-value (kcal/mol) |
|---------------------------------------------|-------------|-------------|--------------------|--------------|--------------------|
| <b>eq</b> R $\omega$ B97X-V/6-311+G(2df,2p) | -393.154454 | -392.887566 | 0                  | 100          | 100                |
| <b>ax</b> R $\omega$ B97X-V/6-311+G(2df,2p) | -393.146782 | -392.878185 | 5.887              | 0.004        | 0.009              |

| geometry method           | $E$ (au)    | Thermal correction to Gibbs Free Energy (au/Particle) |
|---------------------------|-------------|-------------------------------------------------------|
| <b>eq</b> RB3LYP/6-31G(d) | -393.129360 | 0.248472                                              |

ax RB3LYP/6-31G(d) -393.120845 0.249462

| energy method                        | $E$ (au)    | $G$ (au)    | rel $G$ (kcal/mol) | Population % | A-value (kcal/mol) |
|--------------------------------------|-------------|-------------|--------------------|--------------|--------------------|
| eq RB3LYP-D3/6-311+G(2df,2p)         | -393.288420 | -393.039947 | 0                  | 100          | 100                |
| ax RB3LYP-D3/6-311+G(2df,2p)         | -393.280827 | -393.031365 | 5.385              | 0.01         | 0.02               |
| eq R $\omega$ B97X-D/6-311+G(2df,2p) | -393.144553 | -392.896081 | 0                  | 100          | 100                |
| ax R $\omega$ B97X-D/6-311+G(2df,2p) | -393.137418 | -392.887956 | 5.098              | 0.02         | 0.04               |
| eq RM06-2X/6-311+G(2df,2p)           | -393.055145 | -392.806673 | 0                  | 100          | 100                |
| ax RM06-2X /6-311+G(2df,2p)          | -393.04729  | -392.797829 | 5.550              | 0.008        | 0.02               |
| eq RMP2(FC)/6-311+G(2df,2p)          | -392.178722 | -391.930249 | 0                  | 100          | 100                |
| ax RMP2(FC)/6-311+G(2df,2p)          | -392.170849 | -391.921388 | 5.560              | 0.008        | 0.02               |

| geometry method  | $E$ (au)    | Thermal correction to Gibbs Free Energy (au/Particle) |
|------------------|-------------|-------------------------------------------------------|
| eq RB3LYP/6-31G* | -393.129355 | 0.233298                                              |
| ax RB3LYP/6-31G* | -393.120830 | 0.234352                                              |

| energy method                        | $E$ (au)    | $G$ (au)    | rel $G$ (kcal/mol) | Population % | A-value (kcal/mol) |
|--------------------------------------|-------------|-------------|--------------------|--------------|--------------------|
| eq R $\omega$ B97X-V/6-311+G(2df,2p) | -393.155131 | -392.921833 | 0                  | 100          | 100                |
| ax R $\omega$ B97X-V/6-311+G(2df,2p) | -393.147455 | -392.913103 | 5.478              | 0.009        | 0.02               |

| geometry method       | $E$ (au)    | Thermal correction to Gibbs Free Energy (au/Particle) |
|-----------------------|-------------|-------------------------------------------------------|
| eq RB3LYP-D3/6-31G(d) | -393.159630 | 0.249510                                              |
| ax RB3LYP-D3/6-31G(d) | -393.152150 | 0.250966                                              |

| energy method                        | $E$ (au)    | $G$ (au)    | rel $G$ (kcal/mol) | Population % | A-value (kcal/mol) |
|--------------------------------------|-------------|-------------|--------------------|--------------|--------------------|
| eq RB3LYP-D3/6-311+G(2df,2p)         | -393.288517 | -393.039007 | 0                  | 100          | 100                |
| ax RB3LYP-D3/6-311+G(2df,2p)         | -393.280995 | -393.030029 | 5.633              | 0.007        | 0.01               |
| eq R $\omega$ B97X-D/6-311+G(2df,2p) | -393.144724 | -392.895214 | 0                  | 100          | 100                |
| ax R $\omega$ B97X-D/6-311+G(2df,2p) | -393.137802 | -392.886836 | 5.257              | 0.01         | 0.03               |
| eq RM06-2X/6-311+G(2df,2p)           | -393.055397 | -392.805887 | 0                  | 100          | 100                |
| ax RM06-2X /6-311+G(2df,2p)          | -393.047896 | -392.796931 | 5.620              | 0.007        | 0.02               |
| eq RMP2(FC)/6-311+G(2df,2p)          | -392.179049 | -391.929539 | 0                  | 100          | 100                |
| ax RMP2(FC)/6-311+G(2df,2p)          | -392.171446 | -391.920480 | 5.684              | 0.007        | 0.01               |

| geometry method | $E$ (au) | Thermal correction to Gibbs Free Energy (au/Particle) |
|-----------------|----------|-------------------------------------------------------|
|-----------------|----------|-------------------------------------------------------|

**eq** RB3LYP-D3/6-31G\* -393.159626 0.273148

**ax** RB3LYP-D3/6-31G\* -393.152136 0.250271

| energy method                               | $E$ (au)    | $G$ (au)    | rel $G$<br>(kcal/mol) | Population<br>% | A-value<br>(kcal/mol) |
|---------------------------------------------|-------------|-------------|-----------------------|-----------------|-----------------------|
| <b>eq</b> R $\omega$ B97X-V/6-311+G(2df,2p) | -393.155315 | -392.906814 | 0                     | 100             | 100                   |
| <b>ax</b> R $\omega$ B97X-V/6-311+G(2df,2p) | -393.147787 | -392.897516 | 5.834                 | 0.005           | 0.01                  |

| geometry method                      | $E$ (au)    | Thermal correction to Gibbs Free Energy (au/Particle) |
|--------------------------------------|-------------|-------------------------------------------------------|
| <b>eq</b> R $\omega$ B97X-D/6-31G(d) | -393.027018 | 0.250520                                              |
| <b>ax</b> R $\omega$ B97X-D/6-31G(d) | -393.020086 | 0.253542                                              |

| energy method                               | $E$ (au)    | $G$ (au)    | rel $G$<br>(kcal/mol) | Population<br>% | A-value<br>(kcal/mol) |
|---------------------------------------------|-------------|-------------|-----------------------|-----------------|-----------------------|
| <b>eq</b> RB3LYP-D3/6-311+G(2df,2p)         | -393.288662 | -393.038141 | 0                     | 100             | 100                   |
| <b>ax</b> RB3LYP-D3/6-311+G(2df,2p)         | -393.281046 | -393.027505 | 6.675                 | 0.001           | 0.003                 |
| <b>eq</b> R $\omega$ B97X-D/6-311+G(2df,2p) | -393.145232 | -392.894711 | 0                     | 100             | 100                   |
| <b>ax</b> R $\omega$ B97X-D/6-311+G(2df,2p) | -393.138330 | -392.884788 | 6.227                 | 0.003           | 0.005                 |
| <b>eq</b> RM06-2X/6-311+G(2df,2p)           | -393.055982 | -392.805462 | 0                     | 100             | 100                   |
| <b>ax</b> RM06-2X /6-311+G(2df,2p)          | -393.048631 | -392.795089 | 6.509                 | 0.002           | 0.003                 |
| <b>eq</b> RMP2(FC)/6-311+G(2df,2p)          | -392.179842 | -391.929321 | 0                     | 100             | 100                   |
| <b>ax</b> RMP2(FC)/6-311+G(2df,2p)          | -392.172301 | -391.918760 | 6.627                 | 0.001           | 0.003                 |

| geometry method                    | $E$ (au)    | Thermal correction to Gibbs Free Energy (au/Particle) |
|------------------------------------|-------------|-------------------------------------------------------|
| <b>eq</b> R $\omega$ B97X-D/6-31G* | -393.027013 | 0.232419                                              |
| <b>ax</b> R $\omega$ B97X-D/6-31G* | -393.020079 | 0.235528                                              |

| energy method                               | $E$ (au)    | $G$ (au)    | rel $G$<br>(kcal/mol) | Population<br>% | A-value<br>(kcal/mol) |
|---------------------------------------------|-------------|-------------|-----------------------|-----------------|-----------------------|
| <b>eq</b> R $\omega$ B97X-V/6-311+G(2df,2p) | -393.155653 | -392.923234 | 0                     | 100             | 100                   |
| <b>ax</b> R $\omega$ B97X-V/6-311+G(2df,2p) | -393.148137 | -392.912609 | 6.667                 | 0.001           | 0.003                 |

| geometry method            | $E$ (au)    | Thermal correction to Gibbs Free Energy (au/Particle) |
|----------------------------|-------------|-------------------------------------------------------|
| <b>eq</b> RM06-2X/6-31G(d) | -392.926148 | 0.251202                                              |
| <b>ax</b> RM06-2X/6-31G(d) | -392.918707 | 0.253154                                              |

| energy method                       | $E$ (au)    | $G$ (au)    | rel $G$<br>(kcal/mol) | Population<br>% | A-value<br>(kcal/mol) |
|-------------------------------------|-------------|-------------|-----------------------|-----------------|-----------------------|
| <b>eq</b> RB3LYP-D3/6-311+G(2df,2p) | -393.288434 | -393.037233 | 0                     | 100             | 100                   |
| <b>ax</b> RB3LYP-D3/6-311+G(2df,2p) | -393.280801 | -393.027647 | 6.015                 | 0.004           | 0.008                 |



|                                             |               |                                                       |                         |              |                    |      |
|---------------------------------------------|---------------|-------------------------------------------------------|-------------------------|--------------|--------------------|------|
| <b>eq</b> R $\omega$ B97X-D/6-311+G(2df,2p) | -393.145224   | -392.894023                                           | 0                       | 100          | 100                | 5.15 |
| <b>ax</b> R $\omega$ B97X-D/6-311+G(2df,2p) | -393.138325   | -392.885171                                           | 5.555                   | 0.008        | 0.02               |      |
| <b>eq</b> RM06-2X/6-311+G(2df,2p)           | -393.056182   | -392.804981                                           | 0                       | 100          | 100                | 5.42 |
| <b>ax</b> RM06-2X /6-311+G(2df,2p)          | -393.048852   | -392.795698                                           | 5.825                   | 0.005        | 0.01               |      |
| <b>eq</b> RMP2(FC)/6-311+G(2df,2p)          | -392.180108   | -391.928906                                           | 0                       | 100          | 100                | 5.53 |
| <b>ax</b> RMP2(FC)/6-311+G(2df,2p)          | -392.172588   | -391.919434                                           | 5.944                   | 0.004        | 0.009              |      |
| geometry method                             | <i>E</i> (au) | Thermal correction to Gibbs Free Energy (au/Particle) |                         |              |                    |      |
| <b>eq</b> RM06-2X/6-31G*                    | -392.926196   | 0.250561                                              |                         |              |                    |      |
| <b>ax</b> RM06-2X/6-31G*                    | -392.918749   | 0.252620                                              |                         |              |                    |      |
| energy method                               | <i>E</i> (au) | <i>G</i> (au)                                         | rel <i>G</i> (kcal/mol) | Population % | A-value (kcal/mol) |      |
| <b>eq</b> R $\omega$ B97X-V/6-311+G(2df,2p) | -393.155638   | -392.905077                                           | 0                       | 100          | 100                | 5.60 |
| <b>ax</b> R $\omega$ B97X-V/6-311+G(2df,2p) | -393.148122   | -392.895502                                           | 6.008                   | 0.004        | 0.008              |      |
| geometry method                             | <i>E</i> (au) | Thermal correction to Gibbs Free Energy (au/Particle) |                         |              |                    |      |
| <b>eq</b> R $\omega$ B97X-V/6-31G*          | -393.035290   | 0.250599                                              |                         |              |                    |      |
| <b>ax</b> R $\omega$ B97X-V/6-31G*          | -393.027828   | 0.252736                                              |                         |              |                    |      |
| energy method                               | <i>E</i> (au) | <i>G</i> (au)                                         | rel <i>G</i> (kcal/mol) | Population % | A-value (kcal/mol) |      |
| <b>eq</b> RB3LYP-D3/6-311+G(2df,2p)         | -393.289202   | -393.038603                                           | 0                       | 100          | 100                | 5.68 |
| <b>ax</b> RB3LYP-D3/6-311+G(2df,2p)         | -393.281636   | -393.028900                                           | 6.089                   | 0.003        | 0.007              |      |
| <b>eq</b> R $\omega$ B97X-D/6-311+G(2df,2p) | -393.145715   | -392.895116                                           | 0                       | 100          | 100                | 5.25 |
| <b>ax</b> R $\omega$ B97X-D/6-311+G(2df,2p) | -393.138833   | -392.886097                                           | 5.659                   | 0.007        | 0.01               |      |
| <b>eq</b> RM06-2X/6-311+G(2df,2p)           | -393.056570   | -392.805971                                           | 0                       | 100          | 100                | 5.54 |
| <b>ax</b> RM06-2X /6-311+G(2df,2p)          | -393.049227   | -392.796491                                           | 5.949                   | 0.004        | 0.008              |      |
| <b>eq</b> R $\omega$ B97X-V/6-311+G(2df,2p) | -393.155443   | -392.904844                                           | 0                       | 100          | 100                | 5.65 |
| <b>ax</b> R $\omega$ B97X-V/6-311+G(2df,2p) | -393.147926   | -392.895190                                           | 6.058                   | 0.003        | 0.007              |      |
| <b>eq</b> RMP2(FC)/6-311+G(2df,2p)          | -393.179286   | -392.928687                                           | 0                       | 100          | 100                | 5.68 |
| <b>ax</b> RMP2(FC)/6-311+G(2df,2p)          | -393.171724   | -392.918988                                           | 6.086                   | 0.003        | 0.007              |      |
| geometry method                             | <i>E</i> (au) | Thermal correction to Gibbs Free Energy (au/Particle) |                         |              |                    |      |
| <b>eq</b> RMP2(FC)/6-31G(d)                 | -391.660148   | 0.254236                                              |                         |              |                    |      |
| <b>ax</b> RMP2(FC)/6-31G(d)                 | -391.651634   | 0.256531                                              |                         |              |                    |      |

| energy method                               | $E$ (au)    | $G$ (au)    | rel $G$ (kcal/mol) | Population % |       | A-value (kcal/mol) |
|---------------------------------------------|-------------|-------------|--------------------|--------------|-------|--------------------|
| <b>eq</b> RB3LYP-D3/6-311+G(2df,2p)         | -393.288534 | -393.034295 | 0                  | 100          | 100   | 5.78               |
| <b>ax</b> RB3LYP-D3/6-311+G(2df,2p)         | -393.280965 | -393.024434 | 6.188              | 0.003        | 0.006 |                    |
| <b>eq</b> R $\omega$ B97X-D/6-311+G(2df,2p) | -393.145334 | -392.891095 | 0                  | 100          | 100   | 5.37               |
| <b>ax</b> R $\omega$ B97X-D/6-311+G(2df,2p) | -393.138411 | -392.881880 | 5.783              | 0.006        | 0.01  |                    |
| <b>eq</b> RM06-2X/6-311+G(2df,2p)           | -393.056171 | -392.801932 | 0                  | 100          | 100   | 5.69               |
| <b>ax</b> RM06-2X /6-311+G(2df,2p)          | -393.048735 | -392.792204 | 6.104              | 0.003        | 0.006 |                    |
| <b>eq</b> RMP2(FC)/6-311+G(2df,2p)          | -392.180245 | -391.926006 | 0                  | 100          | 100   | 5.80               |
| <b>ax</b> RMP2(FC)/6-311+G(2df,2p)          | -392.172647 | -391.916116 | 6.206              | 0.003        | 0.005 |                    |

  

| geometry method           | $E$ (au)    | Thermal correction to Gibbs Free Energy (au/Particle) |  |  |  |
|---------------------------|-------------|-------------------------------------------------------|--|--|--|
| <b>eq</b> RMP2(FC)/6-31G* | -391.660148 | 0.253693                                              |  |  |  |
| <b>ax</b> RMP2(FC)/6-31G* | -391.651634 | 0.255953                                              |  |  |  |

  

| energy method                               | $E$ (au)    | $G$ (au)    | rel $G$ (kcal/mol) | Population % |       | A-value (kcal/mol) |
|---------------------------------------------|-------------|-------------|--------------------|--------------|-------|--------------------|
| <b>eq</b> R $\omega$ B97X-V/6-311+G(2df,2p) | -393.155688 | -392.901995 | 0                  | 100          | 100   | 5.74               |
| <b>ax</b> R $\omega$ B97X-V/6-311+G(2df,2p) | -393.148155 | -392.892202 | 6.145              | 0.003        | 0.006 |                    |

  

| geometry method                          | $E$ (au)    | $G$ (au)    | rel $G$ (kcal/mol) | Population % |       | A-value (kcal/mol) |
|------------------------------------------|-------------|-------------|--------------------|--------------|-------|--------------------|
| <b>eq</b> RHF/6-311+G(d,p)               | -390.432176 | -390.169126 | 0                  | 100          | 100   | 6.71               |
| <b>ax</b> RHF/6-311+G(d,p)               | -390.422567 | -390.157796 | 7.110              | 0.0006       | 0.001 |                    |
| <b>eq</b> RB3LYP/6-311+G(d,p)            | -393.236552 | -392.991571 | 0                  | 100          | 100   | 5.36               |
| <b>ax</b> RB3LYP/6-311+G(d,p)            | -393.228129 | -392.982379 | 5.768              | 0.006        | 0.01  |                    |
| <b>eq</b> RB3LYP-D3/6-311+G(d,p)         | -393.266844 | -393.020757 | 0                  | 100          | 100   | 5.06               |
| <b>ax</b> RB3LYP-D3/6-311+G(d,p)         | -393.259425 | -393.012045 | 5.467              | 0.01         | 0.02  |                    |
| <b>eq</b> R $\omega$ B97X-D/6-311+G(d,p) | -393.124948 | -392.877726 | 0                  | 100          | 100   | 5.34               |
| <b>ax</b> R $\omega$ B97X-D/6-311+G(d,p) | -393.118188 | -392.868567 | 5.747              | 0.006        | 0.01  |                    |
| <b>eq</b> RM06-2X/6-311+G(d,p)           | -393.034582 | -392.786236 | 0                  | 100          | 100   | 5.32               |
| <b>ax</b> RM06-2X/6-311+G(d,p)           | -393.027344 | -392.777100 | 5.733              | 0.006        | 0.01  |                    |
| <b>eq</b> R $\omega$ B97X-V/6-311+G**    | -393.136936 | -392.890814 | 0                  | 100          | 100   | 5.66               |
| <b>ax</b> R $\omega$ B97X-V/6-311+G**    | -393.129566 | -392.881138 | 6.072              | 0.003        | 0.007 |                    |
| <b>eq</b> RMP2(FC)/6-311+G(d,p)          | -391.961753 | -391.712592 | 0                  | 100          | 100   | 5.31               |

### Trifluoromethylcyclohexane

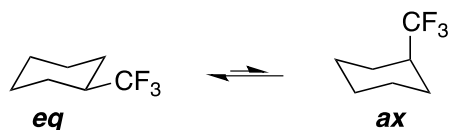

| geometry method        | $E$ (au)    | Thermal correction to Gibbs Free Energy (au/Particle) |
|------------------------|-------------|-------------------------------------------------------|
| <b>eq</b> RHF/6-31G(d) | -569.836362 | 0.155360                                              |
| <b>ax</b> RHF/6-31G(d) | -569.832482 | 0.155887                                              |

| energy method                               | $E$ (au)    | $G$ (au)    | rel $G$ (kcal/mol) | Population % | A-value (kcal/mol) |
|---------------------------------------------|-------------|-------------|--------------------|--------------|--------------------|
| <b>eq</b> RB3LYP-D3/6-311+G(2df,2p)         | -573.148821 | -572.993461 | 0                  | 98.3         | 2.39               |
| <b>ax</b> RB3LYP-D3/6-311+G(2df,2p)         | -573.145541 | -572.989654 | 2.389              | 1.7          |                    |
| <b>eq</b> R $\omega$ B97X-D/6-311+G(2df,2p) | -572.968281 | -572.812921 | 0                  | 98.5         | 2.46               |
| <b>ax</b> R $\omega$ B97X-D/6-311+G(2df,2p) | -572.964880 | -572.808993 | 2.465              | 1.5          |                    |
| <b>eq</b> RM06-2X/6-311+G(2df,2p)           | -572.909062 | -572.753701 | 0                  | 98.6         | 2.51               |
| <b>ax</b> RM06-2X /6-311+G(2df,2p)          | -572.905590 | -572.749703 | 2.509              | 1.4          |                    |
| <b>eq</b> RMP2(FC)/6-311+G(2df,2p)          | -571.933535 | -571.778175 | 0                  | 98.9         | 2.68               |
| <b>ax</b> RMP2(FC)/6-311+G(2df,2p)          | -571.929785 | -571.773898 | 2.684              | 1.1          |                    |

| geometry method      | $E$ (au)    | Thermal correction to Gibbs Free Energy (au/Particle) |
|----------------------|-------------|-------------------------------------------------------|
| <b>eq</b> RHF/6-31G* | -569.836362 | 0.154665                                              |
| <b>ax</b> RHF/6-31G* | -569.832482 | 0.155216                                              |

| energy method                               | $E$ (au)    | $G$ (au)    | rel $G$ (kcal/mol) | Population % | A-value (kcal/mol) |
|---------------------------------------------|-------------|-------------|--------------------|--------------|--------------------|
| <b>eq</b> R $\omega$ B97X-V/6-311+G(2df,2p) | -572.967560 | -572.812895 | 0                  | 98.4         | 2.45               |
| <b>ax</b> R $\omega$ B97X-V/6-311+G(2df,2p) | -572.964213 | -572.808997 | 2.446              | 1.6          |                    |

| geometry method           | $E$ (au)    | Thermal correction to Gibbs Free Energy (au/Particle) |
|---------------------------|-------------|-------------------------------------------------------|
| <b>eq</b> RB3LYP/6-31G(d) | -572.922037 | 0.142311                                              |
| <b>ax</b> RB3LYP/6-31G(d) | -572.919429 | 0.142956                                              |

| energy method                       | $E$ (au)    | $G$ (au)    | rel $G$ (kcal/mol) | Population % | A-value (kcal/mol) |
|-------------------------------------|-------------|-------------|--------------------|--------------|--------------------|
| <b>eq</b> RB3LYP-D3/6-311+G(2df,2p) | -573.150452 | -573.008141 | 0                  | 98.4         | 2.43               |

| <b>ax</b> RB3LYP-D3/6-311+G(2df,2p)         | -573.147224 | -573.004267                                           | 2.431              | 1.6          |                    |
|---------------------------------------------|-------------|-------------------------------------------------------|--------------------|--------------|--------------------|
| <b>eq</b> R $\omega$ B97X-D/6-311+G(2df,2p) | -572.968351 | -572.826040                                           | 0                  | 98.7         | 2.54               |
| <b>ax</b> R $\omega$ B97X-D/6-311+G(2df,2p) | -572.964949 | -572.821992                                           | 2.540              | 1.3          |                    |
| <b>eq</b> RM06-2X/6-311+G(2df,2p)           | -572.908715 | -572.766404                                           | 0                  | 98.6         | 2.52               |
| <b>ax</b> RM06-2X /6-311+G(2df,2p)          | -572.905342 | -572.762386                                           | 2.521              | 1.4          |                    |
| <b>eq</b> RMP2(FC)/6-311+G(2df,2p)          | -571.933500 | -571.791190                                           | 0                  | 99.0         | 2.69               |
| <b>ax</b> RMP2(FC)/6-311+G(2df,2p)          | -571.929857 | -571.786900                                           | 2.692              | 1.0          |                    |
| geometry method                             | $E$ (au)    | Thermal correction to Gibbs Free Energy (au/Particle) |                    |              |                    |
| <b>eq</b> RB3LYP/6-31G*                     | -572.922041 | 0.132709                                              |                    |              |                    |
| <b>ax</b> RB3LYP/6-31G*                     | -572.919424 | 0.133387                                              |                    |              |                    |
| energy method                               | $E$ (au)    | $G$ (au)                                              | rel $G$ (kcal/mol) | Population % | A-value (kcal/mol) |
| <b>eq</b> R $\omega$ B97X-V/6-311+G(2df,2p) | -572.969080 | -572.836371                                           | 0                  | 98.6         | 2.49               |
| <b>ax</b> R $\omega$ B97X-V/6-311+G(2df,2p) | -572.965786 | -572.832399                                           | 2.492              | 1.4          |                    |
| geometry method                             | $E$ (au)    | Thermal correction to Gibbs Free Energy (au/Particle) |                    |              |                    |
| <b>eq</b> RB3LYP-D3/6-31G(d)                | -572.941382 | 0.142916                                              |                    |              |                    |
| <b>ax</b> RB3LYP-D3/6-31G(d)                | -572.939725 | 0.143673                                              |                    |              |                    |
| energy method                               | $E$ (au)    | $G$ (au)                                              | rel $G$ (kcal/mol) | Population % | A-value (kcal/mol) |
| <b>eq</b> RB3LYP-D3/6-311+G(2df,2p)         | -573.150453 | -573.007537                                           | 0                  | 98.7         | 2.54               |
| <b>ax</b> RB3LYP-D3/6-311+G(2df,2p)         | -573.147169 | -573.003496                                           | 2.536              | 1.3          |                    |
| <b>eq</b> R $\omega$ B97X-D/6-311+G(2df,2p) | -572.968354 | -572.825438                                           | 0                  | 98.9         | 2.68               |
| <b>ax</b> R $\omega$ B97X-D/6-311+G(2df,2p) | -572.964842 | -572.821169                                           | 2.679              | 1.1          |                    |
| <b>eq</b> RM06-2X/6-311+G(2df,2p)           | -572.908858 | -572.765941                                           | 0                  | 98.8         | 2.62               |
| <b>ax</b> RM06-2X /6-311+G(2df,2p)          | -572.905443 | -572.761770                                           | 2.617              | 1.2          |                    |
| <b>eq</b> RMP2(FC)/6-311+G(2df,2p)          | -571.933674 | -571.790757                                           | 0                  | 99.1         | 2.79               |
| <b>ax</b> RMP2(FC)/6-311+G(2df,2p)          | -571.929992 | -571.786319                                           | 2.785              | 0.9          |                    |
| geometry method                             | $E$ (au)    | Thermal correction to Gibbs Free Energy (au/Particle) |                    |              |                    |
| <b>eq</b> RB3LYP-D3/6-31G*                  | -572.941383 | 0.142215                                              |                    |              |                    |
| <b>ax</b> RB3LYP-D3/6-31G*                  | -572.939727 | 0.143061                                              |                    |              |                    |
| energy method                               | $E$ (au)    | $G$ (au)                                              | rel $G$ (kcal/mol) | Population % | A-value (kcal/mol) |

| <b>eq</b> R $\omega$ B97X-V/6-311+G(2df,2p) | -572.969128 | -572.826913                                           | 0                  | 98.9         |                    |
|---------------------------------------------|-------------|-------------------------------------------------------|--------------------|--------------|--------------------|
| <b>ax</b> R $\omega$ B97X-V/6-311+G(2df,2p) | -572.965725 | -572.822664                                           | 2.666              | 1.1          | 2.67               |
| geometry method                             | $E$ (au)    | Thermal correction to Gibbs Free Energy (au/Particle) |                    |              |                    |
| <b>eq</b> R $\omega$ B97X-D/6-31G(d)        | -572.774116 | 0.144523                                              |                    |              |                    |
| <b>ax</b> R $\omega$ B97X-D/6-31G(d)        | -572.771818 | 0.144947                                              |                    |              |                    |
| energy method                               | $E$ (au)    | $G$ (au)                                              | rel $G$ (kcal/mol) | Population % | A-value (kcal/mol) |
| <b>eq</b> RB3LYP-D3/6-311+G(2df,2p)         | -573.150566 | -573.006042                                           | 0                  | 98.0         |                    |
| <b>ax</b> RB3LYP-D3/6-311+G(2df,2p)         | -573.147320 | -573.002373                                           | 2.302              | 2.0          | 2.30               |
| <b>eq</b> R $\omega$ B97X-D/6-311+G(2df,2p) | -572.969047 | -572.824524                                           | 0                  | 98.4         |                    |
| <b>ax</b> R $\omega$ B97X-D/6-311+G(2df,2p) | -572.965595 | -572.820648                                           | 2.432              | 1.6          | 2.43               |
| <b>eq</b> RM06-2X/6-311+G(2df,2p)           | -572.909610 | -572.765087                                           | 0                  | 98.3         |                    |
| <b>ax</b> RM06-2X /6-311+G(2df,2p)          | -572.906218 | -572.761271                                           | 2.394              | 1.7          | 2.39               |
| <b>eq</b> RMP2(FC)/6-311+G(2df,2p)          | -571.934395 | -571.789872                                           | 0                  | 98.8         |                    |
| <b>ax</b> RMP2(FC)/6-311+G(2df,2p)          | -571.930703 | -571.785757                                           | 2.582              | 1.2          | 2.58               |
| geometry method                             | $E$ (au)    | Thermal correction to Gibbs Free Energy (au/Particle) |                    |              |                    |
| <b>eq</b> R $\omega$ B97X-D/6-31G*          | -572.774126 | 0.132995                                              |                    |              |                    |
| <b>ax</b> R $\omega$ B97X-D/6-31G*          | -572.771819 | 0.133583                                              |                    |              |                    |
| energy method                               | $E$ (au)    | $G$ (au)                                              | rel $G$ (kcal/mol) | Population % | A-value (kcal/mol) |
| <b>eq</b> R $\omega$ B97X-V/6-311+G(2df,2p) | -572.969447 | -572.836447                                           | 0                  | 98.5         |                    |
| <b>ax</b> R $\omega$ B97X-V/6-311+G(2df,2p) | -572.966090 | -572.832507                                           | 2.475              | 1.5          | 2.48               |
| geometry method                             | $E$ (au)    | Thermal correction to Gibbs Free Energy (au/Particle) |                    |              |                    |
| <b>eq</b> RM06-2X/6-31G(d)                  | -572.698196 | 0.144351                                              |                    |              |                    |
| <b>ax</b> RM06-2X/6-31G(d)                  | -572.696070 | 0.145150                                              |                    |              |                    |
| energy method                               | $E$ (au)    | $G$ (au)                                              | rel $G$ (kcal/mol) | Population % | A-value (kcal/mol) |
| <b>eq</b> RB3LYP-D3/6-311+G(2df,2p)         | -573.150328 | -573.005976                                           | 0                  | 98.8         |                    |
| <b>ax</b> RB3LYP-D3/6-311+G(2df,2p)         | -573.146980 | -573.001829                                           | 2.602              | 1.2          | 2.60               |
| <b>eq</b> R $\omega$ B97X-D/6-311+G(2df,2p) | -572.968974 | -572.824622                                           | 0                  | 99.1         |                    |
| <b>ax</b> R $\omega$ B97X-D/6-311+G(2df,2p) | -572.965352 | -572.820202                                           | 2.774              | 0.9          | 2.77               |
| <b>eq</b> RM06-2X/6-311+G(2df,2p)           | -572.909785 | -572.765433                                           | 0                  | 98.9         |                    |
| <b>ax</b> RM06-2X /6-311+G(2df,2p)          | -572.906340 | -572.761190                                           | 2.663              | 1.1          | 2.66               |

|                                     |               |                                                       |                         |              |                    |
|-------------------------------------|---------------|-------------------------------------------------------|-------------------------|--------------|--------------------|
| <b>eq</b> RMP2(FC)/6-311+G(2df,2p)  | -571.934560   | -571.790208                                           | 0                       | 99.2         |                    |
| <b>ax</b> RMP2(FC)/6-311+G(2df,2p)  | -571.930789   | -571.785638                                           | 2.868                   | 0.8          | 2.87               |
| geometry method                     | <i>E</i> (au) | Thermal correction to Gibbs Free Energy (au/Particle) |                         |              |                    |
| <b>eq</b> RM06-2X/6-31G*            | -572.698274   |                                                       |                         | 0.143784     |                    |
| <b>ax</b> RM06-2X/6-31G*            | -572.696125   |                                                       |                         | 0.144516     |                    |
| energy method                       | <i>E</i> (au) | <i>G</i> (au)                                         | rel <i>G</i> (kcal/mol) | Population % | A-value (kcal/mol) |
| <b>eq</b> RωB97X-V/6-311+G(2df,2p)  | -572.969342   | -572.825558                                           | 0                       | 98.9         |                    |
| <b>ax</b> RωB97X-V/6-311+G(2df,2p)  | -572.965839   | -572.821322                                           | 2.657                   | 1.1          | 2.66               |
| geometry method                     | <i>E</i> (au) | Thermal correction to Gibbs Free Energy (au/Particle) |                         |              |                    |
| <b>eq</b> RωB97X-V/6-31G*           | -572.767048   |                                                       |                         | 0.143931     |                    |
| <b>ax</b> RωB97X-V/6-31G*           | -572.765295   |                                                       |                         | 0.144637     |                    |
| energy method                       | <i>E</i> (au) | <i>G</i> (au)                                         | rel <i>G</i> (kcal/mol) | Population % | A-value (kcal/mol) |
| <b>eq</b> RB3LYP-D3/6-311+G(2df,2p) | -573.152413   | -573.008482                                           | 0                       | 98.7         |                    |
| <b>ax</b> RB3LYP-D3/6-311+G(2df,2p) | -573.149018   | -573.004381                                           | 2.573                   | 1.3          | 2.57               |
| <b>eq</b> RωB97X-D/6-311+G(2df,2p)  | -572.970568   | -572.826637                                           | 0                       | 99.0         |                    |
| <b>ax</b> RωB97X-D/6-311+G(2df,2p)  | -572.966961   | -572.822324                                           | 2.706                   | 1.0          | 2.71               |
| <b>eq</b> RM06-2X/6-311+G(2df,2p)   | -572.911327   | -572.767396                                           | 0                       | 98.9         |                    |
| <b>ax</b> RM06-2X /6-311+G(2df,2p)  | -572.907815   | -572.763178                                           | 2.647                   | 1.1          | 2.65               |
| <b>eq</b> RωB97X-V/6-311+G(2df,2p)  | -572.969271   | -572.825340                                           | 0                       | 98.8         |                    |
| <b>ax</b> RωB97X-V/6-311+G(2df,2p)  | -572.965856   | -572.821219                                           | 2.586                   | 1.2          | 2.59               |
| <b>eq</b> RMP2(FC)/6-311+G(2df,2p)  | -571.933970   | -571.790039                                           | 0                       | 99.1         |                    |
| <b>ax</b> RMP2(FC)/6-311+G(2df,2p)  | -571.930247   | -571.785610                                           | 2.779                   | 0.9          | 2.78               |
| geometry method                     | <i>E</i> (au) | Thermal correction to Gibbs Free Energy (au/Particle) |                         |              |                    |
| <b>eq</b> RMP2(FC)/6-31G(d)         | -571.255410   |                                                       |                         | 0.146312     |                    |
| <b>ax</b> RMP2(FC)/6-31G(d)         | -571.253042   |                                                       |                         | 0.146993     |                    |
| energy method                       | <i>E</i> (au) | <i>G</i> (au)                                         | rel <i>G</i> (kcal/mol) | Population % | A-value (kcal/mol) |
| <b>eq</b> RB3LYP-D3/6-311+G(2df,2p) | -573.150501   | -573.004189                                           | 0                       | 98.6         |                    |
| <b>ax</b> RB3LYP-D3/6-311+G(2df,2p) | -573.147199   | -573.000205                                           | 2.500                   | 1.4          | 2.50               |
| <b>eq</b> RωB97X-D/6-311+G(2df,2p)  | -572.968611   | -572.822299                                           | 0                       | 98.9         |                    |
| <b>ax</b> RωB97X-D/6-311+G(2df,2p)  | -572.965079   | -572.818085                                           | 2.644                   | 1.1          | 2.64               |

| <b>eq</b> RM06-2X/6-311+G(2df,2p)  | -572.909173   | -572.762861                                           | 0                       | 98.8         |                    |
|------------------------------------|---------------|-------------------------------------------------------|-------------------------|--------------|--------------------|
| <b>ax</b> RM06-2X /6-311+G(2df,2p) | -572.905736   | -572.758742                                           | 2.584                   | 1.2          | 2.58               |
| <b>eq</b> RMP2(FC)/6-311+G(2df,2p) | -571.934275   | -571.787963                                           | 0                       | 99.1         |                    |
| <b>ax</b> RMP2(FC)/6-311+G(2df,2p) | -571.930517   | -571.783523                                           | 2.786                   | 0.9          | 2.79               |
| geometry method                    | <i>E</i> (au) | Thermal correction to Gibbs Free Energy (au/Particle) |                         |              |                    |
| <b>eq</b> RMP2(FC)/6-31G*          | -571.255410   | 0.145618                                              |                         |              |                    |
| <b>ax</b> RMP2(FC)/6-31G*          | -571.253042   | 0.146342                                              |                         |              |                    |
| energy method                      | <i>E</i> (au) | <i>G</i> (au)                                         | rel <i>G</i> (kcal/mol) | Population % | A-value (kcal/mol) |
| <b>eq</b> RωB97X-V/6-311+G(2df,2p) | -572.969323   | -572.823705                                           | 0                       | 98.8         |                    |
| <b>ax</b> RωB97X-V/6-311+G(2df,2p) | -572.965879   | -572.819537                                           | 2.615                   | 1.2          | 2.62               |
| geometry method                    | <i>E</i> (au) | <i>G</i> (au)                                         | rel <i>G</i> (kcal/mol) | Population % | A-value (kcal/mol) |
| <b>eq</b> RHF/6-311+G(d,p)         | -569.990557   | -569.837673                                           | 0                       | 99.5         |                    |
| <b>ax</b> RHF/6-311+G(d,p)         | -569.986012   | -569.832714                                           | 3.112                   | 0.5          | 3.11               |
| <b>eq</b> RB3LYP/6-311+G(d,p)      | -573.101481   | -572.961423                                           | 0                       | 99.0         |                    |
| <b>ax</b> RB3LYP/6-311+G(d,p)      | -573.097585   | -572.957141                                           | 2.687                   | 1.0          | 2.69               |
| <b>eq</b> RB3LYP-D3/6-311+G(d,p)   | -573.120742   | -572.980116                                           | 0                       | 97.9         |                    |
| <b>ax</b> RB3LYP-D3/6-311+G(d,p)   | -573.117697   | -572.976483                                           | 2.280                   | 2.1          | 2.28               |
| <b>eq</b> RωB97X-D/6-311+G(d,p)    | -572.939952   | -572.797702                                           | 0                       | 97.1         |                    |
| <b>ax</b> RωB97X-D/6-311+G(d,p)    | -572.936749   | -572.794381                                           | 2.084                   | 2.9          | 2.08               |
| <b>eq</b> RM06-2X/6-311+G(d,p)     | -572.879748   | -572.737122                                           | 0                       | 97.9         |                    |
| <b>ax</b> RM06-2X/6-311+G(d,p)     | -572.876661   | -572.733522                                           | 2.259                   | 2.1          | 2.26               |
| <b>eq</b> RωB97X-V/6-311+G**       | -572.941066   | -572.799990                                           | 0                       | 97.9         |                    |
| <b>ax</b> RωB97X-V/6-311+G**       | -572.937955   | -572.796360                                           | 2.278                   | 2.1          | 2.28               |
| <b>eq</b> RMP2(FC)/6-311+G(d,p)    | -571.638222   | -571.495220                                           | 0                       | 98.9         |                    |
| <b>ax</b> RMP2(FC)/6-311+G(d,p)    | -571.634642   | -571.490990                                           | 2.654                   | 1.1          | 2.65               |

# Cyclohexyltrimethylsilane

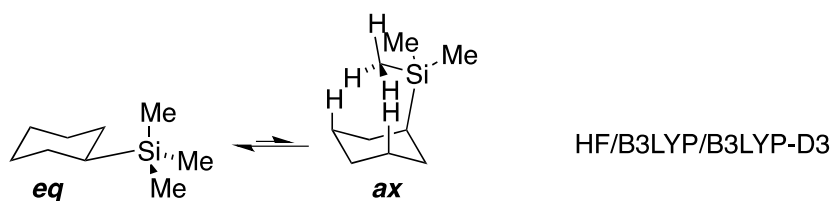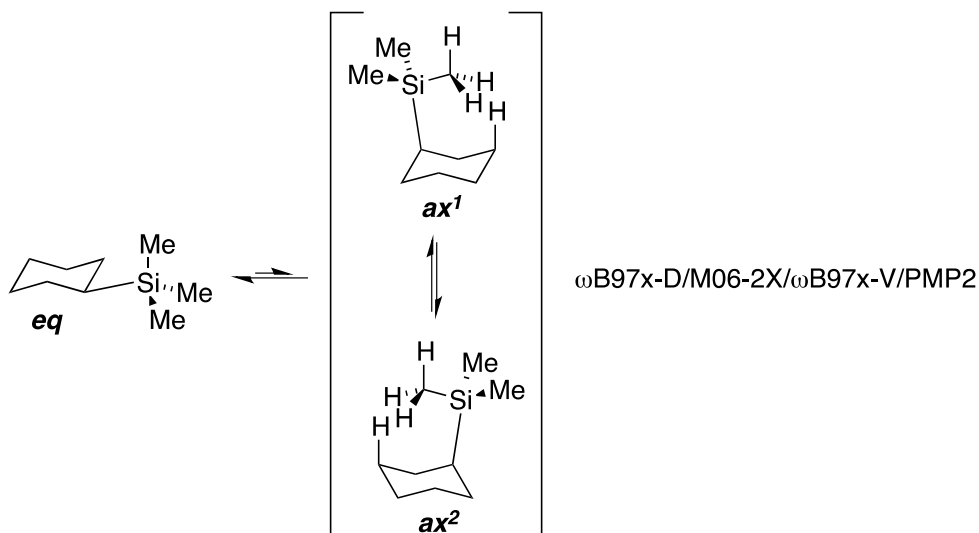

| geometry method                             | $E$ (au)    | Thermal correction to Gibbs Free Energy (au/Particle) |                    |              |                    |
|---------------------------------------------|-------------|-------------------------------------------------------|--------------------|--------------|--------------------|
| <b>eq</b> RHF/6-31G(d)                      | -641.418841 | 0.251244                                              |                    |              |                    |
| <b>ax</b> RHF/6-31G(d)                      | -641.413221 | 0.251875                                              |                    |              |                    |
| energy method                               | $E$ (au)    | $G$ (au)                                              | rel $G$ (kcal/mol) | Population % | A-value (kcal/mol) |
| <b>eq</b> RB3LYP-D3/6-311+G(2df,2p)         | -644.728475 | -644.477231                                           | 0                  | 98.8         | 2.60               |
| <b>ax</b> RB3LYP-D3/6-311+G(2df,2p)         | -644.724957 | -644.473082                                           | 2.603              | 1.2          |                    |
| <b>eq</b> R $\omega$ B97X-D/6-311+G(2df,2p) | -644.575553 | -644.324309                                           | 0                  | 98.3         | 2.40               |
| <b>ax</b> R $\omega$ B97X-D/6-311+G(2df,2p) | -644.572361 | -644.320486                                           | 2.399              | 1.7          |                    |
| <b>eq</b> RM06-2X/6-311+G(2df,2p)           | -644.472316 | -644.221072                                           | 0                  | 98.9         | 2.68               |
| <b>ax</b> RM06-2X /6-311+G(2df,2p)          | -644.468680 | -644.216806                                           | 2.677              | 1.1          |                    |
| <b>eq</b> RMP2(FC)/6-311+G(2df,2p)          | -643.227856 | -642.976612                                           | 0                  | 99.1         | 2.76               |
| <b>ax</b> RMP2(FC)/6-311+G(2df,2p)          | -643.224090 | -642.972215                                           | 2.759              | 0.9          |                    |
| geometry method                             | $E$ (au)    | Thermal correction to Gibbs Free Energy (au/Particle) |                    |              |                    |
| <b>eq</b> RHF/6-31G*                        | -641.418841 | 0.249507                                              |                    |              |                    |
| <b>ax</b> RHF/6-31G*                        | -641.413217 | 0.249664                                              |                    |              |                    |



| energy method                               | $E$ (au)    | $G$ (au)                                              | rel $G$ (kcal/mol) | Population % | A-value (kcal/mol) |
|---------------------------------------------|-------------|-------------------------------------------------------|--------------------|--------------|--------------------|
| <b>eq</b> R $\omega$ B97X-V/6-311+G(2df,2p) | -644.538673 | -644.289166                                           | 0                  | 98.2         | 2.37               |
| <b>ax</b> R $\omega$ B97X-V/6-311+G(2df,2p) | -644.535061 | -644.285397                                           | 2.365              | 1.8          |                    |
| geometry method                             | $E$ (au)    | Thermal correction to Gibbs Free Energy (au/Particle) |                    |              |                    |
| <b>eq</b> RB3LYP/6-31G(d)                   | -644.548524 | 0.233243                                              |                    |              |                    |
| <b>ax</b> RB3LYP/6-31G(d)                   | -644.543641 | 0.233418                                              |                    |              |                    |
| energy method                               | $E$ (au)    | $G$ (au)                                              | rel $G$ (kcal/mol) | Population % | A-value (kcal/mol) |
| <b>eq</b> RB3LYP-D3/6-311+G(2df,2p)         | -644.728429 | -644.495187                                           | 0                  | 97.9         | 2.28               |
| <b>ax</b> RB3LYP-D3/6-311+G(2df,2p)         | -644.724974 | -644.491556                                           | 2.279              | 2.1          |                    |
| <b>eq</b> R $\omega$ B97X-D/6-311+G(2df,2p) | -644.575247 | -644.342005                                           | 0                  | 97.1         | 2.08               |
| <b>ax</b> R $\omega$ B97X-D/6-311+G(2df,2p) | -644.572115 | -644.338697                                           | 2.076              | 2.9          |                    |
| <b>eq</b> RM06-2X/6-311+G(2df,2p)           | -644.471927 | -644.238685                                           | 0                  | 98.4         | 2.44               |
| <b>ax</b> RM06-2X /6-311+G(2df,2p)          | -644.468214 | -644.234796                                           | 2.440              | 1.6          |                    |
| <b>eq</b> RMP2(FC)/6-311+G(2df,2p)          | -643.227213 | -642.993971                                           | 0                  | 98.4         | 2.44               |
| <b>ax</b> RMP2(FC)/6-311+G(2df,2p)          | -643.223507 | -642.990088                                           | 2.436              | 1.6          |                    |
| geometry method                             | $E$ (au)    | Thermal correction to Gibbs Free Energy (au/Particle) |                    |              |                    |
| <b>eq</b> RB3LYP/6-31G*                     | -644.548521 | 0.217541                                              |                    |              |                    |
| <b>ax</b> RB3LYP/6-31G*                     | -644.543631 | 0.217282                                              |                    |              |                    |
| energy method                               | $E$ (au)    | $G$ (au)                                              | rel $G$ (kcal/mol) | Population % | A-value (kcal/mol) |
| <b>eq</b> R $\omega$ B97X-V/6-311+G(2df,2p) | -644.539851 | -644.322310                                           | 0                  | 96.9         | 2.04               |
| <b>ax</b> R $\omega$ B97X-V/6-311+G(2df,2p) | -644.536344 | -644.319062                                           | 2.038              | 3.1          |                    |
| geometry method                             | $E$ (au)    | Thermal correction to Gibbs Free Energy (au/Particle) |                    |              |                    |
| <b>eq</b> RB3LYP-D3/6-31G(d)                | -644.574007 | 0.233781                                              |                    |              |                    |
| <b>ax</b> RB3LYP-D3/6-31G(d)                | -644.570504 | 0.234460                                              |                    |              |                    |
| energy method                               | $E$ (au)    | $G$ (au)                                              | rel $G$ (kcal/mol) | Population % | A-value (kcal/mol) |
| <b>eq</b> RB3LYP-D3/6-311+G(2df,2p)         | -644.728665 | -644.494880                                           | 0                  | 98.8         | 2.58               |
| <b>ax</b> RB3LYP-D3/6-311+G(2df,2p)         | -644.725226 | -644.490765                                           | 2.582              | 1.2          |                    |
| <b>eq</b> R $\omega$ B97X-D/6-311+G(2df,2p) | -644.575672 | -644.341887                                           | 0                  | 98.0         | 2.30               |
| <b>ax</b> R $\omega$ B97X-D/6-311+G(2df,2p) | -644.572682 | -644.338222                                           | 2.300              | 2.0          |                    |

|                                     |               |                                                       |                         |              |                    |      |
|-------------------------------------|---------------|-------------------------------------------------------|-------------------------|--------------|--------------------|------|
| <b>eq</b> RM06-2X/6-311+G(2df,2p)   | -644.472414   | -644.238630                                           | 0                       | 98.6         |                    |      |
| <b>ax</b> RM06-2X /6-311+G(2df,2p)  | -644.469056   | -644.234596                                           | 2.531                   | 1.4          |                    | 2.53 |
| <b>eq</b> RMP2(FC)/6-311+G(2df,2p)  | -643.227699   | -642.993915                                           | 0                       | 98.8         |                    |      |
| <b>ax</b> RMP2(FC)/6-311+G(2df,2p)  | -643.224185   | -642.989725                                           | 2.629                   | 1.2          |                    | 2.63 |
| geometry method                     | <i>E</i> (au) | Thermal correction to Gibbs Free Energy (au/Particle) |                         |              |                    |      |
| <b>eq</b> RB3LYP-D3/6-31G*          | -644.574005   | 0.231914                                              |                         |              |                    |      |
| <b>ax</b> RB3LYP-D3/6-31G*          | -644.570479   | 0.231446                                              |                         |              |                    |      |
| energy method                       | <i>E</i> (au) | <i>G</i> (au)                                         | rel <i>G</i> (kcal/mol) | Population % | A-value (kcal/mol) |      |
| <b>eq</b> RωB97X-V/6-311+G(2df,2p)  | -644.540218   | -644.308304                                           | 0                       | 96.0         |                    |      |
| <b>ax</b> RωB97X-V/6-311+G(2df,2p)  | -644.536754   | -644.305308                                           | 1.880                   | 4.0          | 1.88               |      |
| geometry method                     | <i>E</i> (au) | Thermal correction to Gibbs Free Energy (au/Particle) |                         |              |                    |      |
| <b>eq</b> RωB97X-D/6-31G(d)         | -644.434423   | 0.236216                                              |                         |              |                    |      |
| <b>ax</b> RωB97X-D/6-31G(d)         | -644.431404   | 0.237495                                              |                         |              |                    |      |
| energy method                       | <i>E</i> (au) | <i>G</i> (au)                                         | rel <i>G</i> (kcal/mol) | Population % | A-value (kcal/mol) |      |
| <b>eq</b> RB3LYP-D3/6-311+G(2df,2p) | -644.728925   | -644.492708                                           | 0                       | 98.9         | 98.8               |      |
| <b>ax</b> RB3LYP-D3/6-311+G(2df,2p) | -644.725364   | -644.487869                                           | 3.037                   | 0.6          | 1.2                | 2.63 |
| <b>eq</b> RωB97X-D/6-311+G(2df,2p)  | -644.576329   | -644.340112                                           | 0                       | 97.9         | 97.9               |      |
| <b>ax</b> RωB97X-D/6-311+G(2df,2p)  | -644.573377   | -644.335882                                           | 2.654                   | 1.1          | 2.2                | 2.24 |
| <b>eq</b> RM06-2X/6-311+G(2df,2p)   | -644.473111   | -644.236895                                           | 0                       | 98.2         | 98.2               |      |
| <b>ax</b> RM06-2X /6-311+G(2df,2p)  | -644.470006   | -644.232510                                           | 2.751                   | 0.9          | 1.9                | 2.34 |
| <b>eq</b> RMP2(FC)/6-311+G(2df,2p)  | -643.228438   | -642.992221                                           | 0                       | 98.7         | 98.6               |      |
| <b>ax</b> RMP2(FC)/6-311+G(2df,2p)  | -643.225031   | -642.987536                                           | 2.940                   | 0.7          | 1.4                | 2.53 |
| geometry method                     | <i>E</i> (au) | Thermal correction to Gibbs Free Energy (au/Particle) |                         |              |                    |      |
| <b>eq</b> RωB97X-D/6-31G*           | -644.434417   | 0.217347                                              |                         |              |                    |      |
| <b>ax</b> RωB97X-D/6-31G*           | -644.431386   | 0.219032                                              |                         |              |                    |      |
| energy method                       | <i>E</i> (au) | <i>G</i> (au)                                         | rel <i>G</i> (kcal/mol) | Population % | A-value (kcal/mol) |      |
| <b>eq</b> RωB97X-V/6-311+G(2df,2p)  | -644.540621   | -644.323274                                           | 0                       | 99.2         | 99.1               |      |
| <b>ax</b> RωB97X-V/6-311+G(2df,2p)  | -644.537241   | -644.318209                                           | 3.178                   | 0.5          | 0.9                | 2.77 |
| geometry method                     | <i>E</i> (au) | Thermal correction to Gibbs Free Energy (au/Particle) |                         |              |                    |      |
| <b>eq</b> RM06-2X/6-31G(d)          | -644.316900   | 0.235059                                              |                         |              |                    |      |

ax RM06-2X/6-31G(d)      -644.313768      0.237261

| energy method                       | <i>E</i> (au) | <i>G</i> (au) | rel <i>G</i> (kcal/mol) | Population % | A-value (kcal/mol) |
|-------------------------------------|---------------|---------------|-------------------------|--------------|--------------------|
| <b>eq</b> RB3LYP-D3/6-311+G(2df,2p) | -644.728897   | -644.493838   | 0                       | 99.7         | 99.7               |
| <b>ax</b> RB3LYP-D3/6-311+G(2df,2p) | -644.725022   | -644.487760   | 3.814                   | 0.2          | 0.3                |
| <b>eq</b> RωB97X-D/6-311+G(2df,2p)  | -644.576399   | -644.341340   | 0                       | 99.3         | 99.3               |
| <b>ax</b> RωB97X-D/6-311+G(2df,2p)  | -644.573289   | -644.336028   | 3.333                   | 0.4          | 0.7                |
| <b>eq</b> RM06-2X/6-311+G(2df,2p)   | -644.473257   | -644.238198   | 0                       | 99.2         | 99.2               |
| <b>ax</b> RM06-2X /6-311+G(2df,2p)  | -644.470245   | -644.232984   | 3.272                   | 0.4          | 0.8                |
| <b>eq</b> RMP2(FC)/6-311+G(2df,2p)  | -643.228624   | -642.993565   | 0                       | 99.5         | 99.5               |
| <b>ax</b> RMP2(FC)/6-311+G(2df,2p)  | -643.225193   | -642.987932   | 3.535                   | 0.3          | 0.5                |

| geometry method          | <i>E</i> (au) | Thermal correction to Gibbs Free Energy (au/Particle) |
|--------------------------|---------------|-------------------------------------------------------|
| <b>eq</b> RM06-2X/6-31G* | -644.316954   | 0.233656                                              |
| <b>ax</b> RM06-2X/6-31G* | -644.313814   | 0.235682                                              |

| energy method                      | <i>E</i> (au) | <i>G</i> (au) | rel <i>G</i> (kcal/mol) | Population % | A-value (kcal/mol) |
|------------------------------------|---------------|---------------|-------------------------|--------------|--------------------|
| <b>eq</b> RωB97X-V/6-311+G(2df,2p) | -644.540652   | -644.306996   | 0                       | 99.4         | 99.4               |
| <b>ax</b> RωB97X-V/6-311+G(2df,2p) | -644.537134   | -644.301452   | 3.479                   | 0.3          | 0.6                |

| geometry method           | <i>E</i> (au) | Thermal correction to Gibbs Free Energy (au/Particle) |
|---------------------------|---------------|-------------------------------------------------------|
| <b>eq</b> RωB97X-V/6-31G* | -644.396591   | 0.234584                                              |
| <b>ax</b> RωB97X-V/6-31G* | -644.393193   | 0.236031                                              |

| energy method                       | <i>E</i> (au) | <i>G</i> (au) | rel <i>G</i> (kcal/mol) | Population % | A-value (kcal/mol) |
|-------------------------------------|---------------|---------------|-------------------------|--------------|--------------------|
| <b>eq</b> RB3LYP-D3/6-311+G(2df,2p) | -644.729580   | -644.494996   | 0                       | 99.0         | 99.0               |
| <b>ax</b> RB3LYP-D3/6-311+G(2df,2p) | -644.726070   | -644.490039   | 3.111                   | 0.5          | 1.0                |
| <b>eq</b> RωB97X-D/6-311+G(2df,2p)  | -644.576878   | -644.342294   | 0                       | 98.1         | 98.1               |
| <b>ax</b> RωB97X-D/6-311+G(2df,2p)  | -644.573942   | -644.337911   | 2.750                   | 0.9          | 1.9                |
| <b>eq</b> RM06-2X/6-311+G(2df,2p)   | -644.473778   | -644.239194   | 0                       | 98.5         | 98.5               |
| <b>ax</b> RM06-2X /6-311+G(2df,2p)  | -644.470663   | -644.234632   | 2.863                   | 0.8          | 1.5                |
| <b>eq</b> RωB97X-V/6-311+G(2df,2p)  | -644.540324   | -644.305740   | 0                       | 98.8         | 98.8               |
| <b>ax</b> RωB97X-V/6-311+G(2df,2p)  | -644.536947   | -644.300916   | 3.027                   | 0.6          | 1.2                |
| <b>eq</b> RMP2(FC)/6-311+G(2df,2p)  | -643.933970   | -643.699386   | 0                       | 99.2         | 99.2               |
| <b>ax</b> RMP2(FC)/6-311+G(2df,2p)  | -643.930247   | -643.694216   | 3.244                   | 0.4          | 0.8                |

| geometry method             | $E$ (au)    | Thermal correction to Gibbs Free Energy (au/Particle) |  |  |  |
|-----------------------------|-------------|-------------------------------------------------------|--|--|--|
| <b>eq</b> RMP2(FC)/6-31G(d) | -642.684355 | 0.239687                                              |  |  |  |
| <b>ax</b> RMP2(FC)/6-31G(d) | -642.680360 | 0.240969                                              |  |  |  |

  

| energy method                       | $E$ (au)    | $G$ (au)    | rel $G$ (kcal/mol) | Population % | A-value (kcal/mol) |
|-------------------------------------|-------------|-------------|--------------------|--------------|--------------------|
| <b>eq</b> RB3LYP-D3/6-311+G(2df,2p) | -644.728888 | -644.489202 | 0                  | 98.8         | 98.8               |
| <b>ax</b> RB3LYP-D3/6-311+G(2df,2p) | -644.725329 | -644.484360 | 3.038              | 0.6          | 1.2                |
| <b>eq</b> RωB97X-D/6-311+G(2df,2p)  | -644.576294 | -644.336608 | 0                  | 97.9         | 97.9               |
| <b>ax</b> RωB97X-D/6-311+G(2df,2p)  | -644.573318 | -644.332349 | 2.672              | 1.1          | 2.1                |
| <b>eq</b> RM06-2X/6-311+G(2df,2p)   | -644.473099 | -644.233413 | 0                  | 98.2         | 98.2               |
| <b>ax</b> RM06-2X /6-311+G(2df,2p)  | -644.469954 | -644.228985 | 2.779              | 0.9          | 1.8                |
| <b>eq</b> RMP2(FC)/6-311+G(2df,2p)  | -643.228533 | -642.988847 | 0                  | 98.6         | 98.6               |
| <b>ax</b> RMP2(FC)/6-311+G(2df,2p)  | -643.225136 | -642.984167 | 2.937              | 0.7          | 1.4                |

  

| geometry method           | $E$ (au)    | Thermal correction to Gibbs Free Energy (au/Particle) |  |  |  |
|---------------------------|-------------|-------------------------------------------------------|--|--|--|
| <b>eq</b> RMP2(FC)/6-31G* | -642.684355 | 0.238124                                              |  |  |  |
| <b>ax</b> RMP2(FC)/6-31G* | -642.680360 | 0.239596                                              |  |  |  |

  

| energy method                      | $E$ (au)    | $G$ (au)    | rel $G$ (kcal/mol) | Population % | A-value (kcal/mol) |
|------------------------------------|-------------|-------------|--------------------|--------------|--------------------|
| <b>eq</b> RωB97X-V/6-311+G(2df,2p) | -644.540557 | -644.302433 | 0                  | 98.9         | 98.9               |
| <b>ax</b> RωB97X-V/6-311+G(2df,2p) | -644.537166 | -644.297570 | 3.052              | 0.6          | 1.1                |

  

| geometry method                  | $E$ (au)    | $G$ (au)    | rel $G$ (kcal/mol) | Population % | A-value (kcal/mol) |
|----------------------------------|-------------|-------------|--------------------|--------------|--------------------|
| <b>eq</b> RHF/6-311+G(d,p)       | -641.531227 | -641.284199 | 0                  | 99.8         | 99.8               |
| <b>ax</b> RHF/6-311+G(d,p)       | -641.525824 | -641.278297 | 3.704              | 0.2          | 3.70               |
| <b>eq</b> RB3LYP/6-311+G(d,p)    | -644.677491 | -644.447696 | 0                  | 99.2         | 99.2               |
| <b>ax</b> RB3LYP/6-311+G(d,p)    | -644.672793 | -644.442544 | 3.233              | 0.4          | 0.8                |
| <b>eq</b> RB3LYP-D3/6-311+G(d,p) | -644.703037 | -644.472443 | 0                  | 98.4         | 98.4               |
| <b>ax</b> RB3LYP-D3/6-311+G(d,p) | -644.699689 | -644.468575 | 2.427              | 1.6          | 2.43               |
| <b>eq</b> RωB97X-D/6-311+G(d,p)  | -644.551813 | -644.318932 | 0                  | 95.9         | 95.9               |
| <b>ax</b> RωB97X-D/6-311+G(d,p)  | -644.549060 | -644.315306 | 2.275              | 2.0          | 4.1                |
| <b>eq</b> RM06-2X/6-311+G(d,p)   | -644.448033 | -644.215768 | 0                  | 99.0         | 99.0               |
| <b>ax</b> RM06-2X/6-311+G(d,p)   | -644.445231 | -644.210795 | 3.121              | 0.5          | 1.0                |
| <b>eq</b> RωB97X-V/6-311+G**     | -644.517419 | -644.287181 | 0                  | 98.5         | 98.5               |

|                                 |             |             |       |      |      |      |
|---------------------------------|-------------|-------------|-------|------|------|------|
| <b>ax</b> RωB97X-V/6-311+G**    | -644.514251 | -644.282596 | 2.877 | 0.8  | 1.5  |      |
| <b>eq</b> RMP2(FC)/6-311+G(d,p) | -643.005567 | -642.772310 | 0     | 99.2 | 99.2 |      |
| <b>ax</b> RMP2(FC)/6-311+G(d,p) | -643.002175 | -642.767157 | 3.234 | 0.4  | 0.8  | 2.82 |

## Cyclohexylethyne

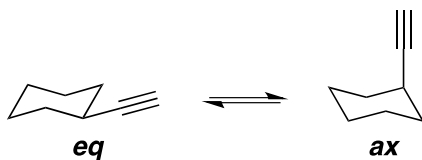

| geometry method        | $E$ (au)    | Thermal correction to Gibbs Free Energy (au/Particle) |
|------------------------|-------------|-------------------------------------------------------|
| <b>eq</b> RHF/6-31G(d) | -309.879346 | 0.161516                                              |
| <b>ax</b> RHF/6-31G(d) | -309.878268 | 0.161877                                              |

| energy method                       | $E$ (au)    | $G$ (au)    | rel $G$ (kcal/mol) | Population % | A-value (kcal/mol) |
|-------------------------------------|-------------|-------------|--------------------|--------------|--------------------|
| <b>eq</b> RB3LYP-D3/6-311+G(2df,2p) | -312.141316 | -311.979801 | 0                  | 81.3         |                    |
| <b>ax</b> RB3LYP-D3/6-311+G(2df,2p) | -312.140294 | -311.978416 | 0.869              | 18.7         | 0.87               |
| <b>eq</b> RωB97X-D/6-311+G(2df,2p)  | -312.021138 | -311.859622 | 0                  | 71.5         |                    |
| <b>ax</b> RωB97X-D/6-311+G(2df,2p)  | -312.020635 | -311.858757 | 0.542              | 28.5         | 0.54               |
| <b>eq</b> RM06-2X/6-311+G(2df,2p)   | -311.974268 | -311.812752 | 0                  | 67.0         |                    |
| <b>ax</b> RM06-2X /6-311+G(2df,2p)  | -311.973964 | -311.812086 | 0.418              | 33.0         | 0.42               |
| <b>eq</b> RMP2(FC)/6-311+G(2df,2p)  | -311.286638 | -311.125124 | 0                  | 60.6         |                    |
| <b>ax</b> RMP2(FC)/6-311+G(2df,2p)  | -311.286596 | -311.124717 | 0.255              | 39.4         | 0.25               |

| geometry method      | $E$ (au)    | Thermal correction to Gibbs Free Energy (au/Particle) |
|----------------------|-------------|-------------------------------------------------------|
| <b>eq</b> RHF/6-31G* | -309.879346 | 0.161104                                              |
| <b>ax</b> RHF/6-31G* | -309.878268 | 0.161470                                              |

| energy method                      | $E$ (au)    | $G$ (au)    | rel $G$ (kcal/mol) | Population % | A-value (kcal/mol) |
|------------------------------------|-------------|-------------|--------------------|--------------|--------------------|
| <b>eq</b> RωB97X-V/6-311+G(2df,2p) | -312.036586 | -311.875482 | 0                  | 71.2         |                    |
| <b>ax</b> RωB97X-V/6-311+G(2df,2p) | -312.036101 | -311.874631 | 0.534              | 28.8         | 0.53               |

| geometry method           | $E$ (au)    | Thermal correction to Gibbs Free Energy (au/Particle) |
|---------------------------|-------------|-------------------------------------------------------|
| <b>eq</b> RB3LYP/6-31G(d) | -312.018542 | 0.148289                                              |
| <b>ax</b> RB3LYP/6-31G(d) | -312.017591 | 0.148648                                              |

| energy method                               | $E$ (au)    | $G$ (au)                                              | rel $G$ (kcal/mol) | Population % | A-value (kcal/mol) |
|---------------------------------------------|-------------|-------------------------------------------------------|--------------------|--------------|--------------------|
| <b>eq</b> RB3LYP-D3/6-311+G(2df,2p)         | -312.141648 | -311.993359                                           | 0                  | 81.6         | 0.88               |
| <b>ax</b> RB3LYP-D3/6-311+G(2df,2p)         | -312.140604 | -311.991956                                           | 0.880              | 18.4         |                    |
| <b>eq</b> R $\omega$ B97X-D/6-311+G(2df,2p) | -312.020986 | -311.872696                                           | 0                  | 71.3         | 0.54               |
| <b>ax</b> R $\omega$ B97X-D/6-311+G(2df,2p) | -312.020489 | -311.871841                                           | 0.537              | 28.7         |                    |
| <b>eq</b> RM06-2X/6-311+G(2df,2p)           | -311.974066 | -311.825777                                           | 0                  | 65.4         | 0.38               |
| <b>ax</b> RM06-2X /6-311+G(2df,2p)          | -311.973825 | -311.825177                                           | 0.377              | 34.6         |                    |
| <b>eq</b> RMP2(FC)/6-311+G(2df,2p)          | -311.287623 | -311.139333                                           | 0                  | 57.4         | 0.18               |
| <b>ax</b> RMP2(FC)/6-311+G(2df,2p)          | -311.287698 | -311.139050                                           | 0.177              | 42.6         |                    |
| geometry method                             | $E$ (au)    | Thermal correction to Gibbs Free Energy (au/Particle) |                    |              |                    |
| <b>eq</b> RB3LYP/6-31G*                     | -312.018548 | 0.148817                                              |                    |              |                    |
| <b>ax</b> RB3LYP/6-31G*                     | -312.017590 | 0.139235                                              |                    |              |                    |
| energy method                               | $E$ (au)    | $G$ (au)                                              | rel $G$ (kcal/mol) | Population % | A-value (kcal/mol) |
| <b>eq</b> R $\omega$ B97X-V/6-311+G(2df,2p) | -312.037165 | -311.898275                                           | 0                  | 70.0         | 0.50               |
| <b>ax</b> R $\omega$ B97X-V/6-311+G(2df,2p) | -312.036712 | -311.897477                                           | 0.501              | 30.0         |                    |
| geometry method                             | $E$ (au)    | Thermal correction to Gibbs Free Energy (au/Particle) |                    |              |                    |
| <b>eq</b> RB3LYP-D3/6-31G(d)                | -312.034251 | 0.142916                                              |                    |              |                    |
| <b>ax</b> RB3LYP-D3/6-31G(d)                | -312.033944 | 0.149157                                              |                    |              |                    |
| energy method                               | $E$ (au)    | $G$ (au)                                              | rel $G$ (kcal/mol) | Population % | A-value (kcal/mol) |
| <b>eq</b> RB3LYP-D3/6-311+G(2df,2p)         | -312.141701 | -311.992884                                           | 0                  | 82.1         | 0.90               |
| <b>ax</b> RB3LYP-D3/6-311+G(2df,2p)         | -312.140607 | -311.991449                                           | 0.901              | 17.9         |                    |
| <b>eq</b> R $\omega$ B97X-D/6-311+G(2df,2p) | -312.021067 | -311.872250                                           | 0                  | 71.6         | 0.55               |
| <b>ax</b> R $\omega$ B97X-D/6-311+G(2df,2p) | -312.020535 | -311.871378                                           | 0.547              | 28.4         |                    |
| <b>eq</b> RM06-2X/6-311+G(2df,2p)           | -311.974211 | -311.825394                                           | 0                  | 65.0         | 0.37               |
| <b>ax</b> RM06-2X /6-311+G(2df,2p)          | -311.973968 | -311.824811                                           | 0.366              | 35.0         |                    |
| <b>eq</b> RMP2(FC)/6-311+G(2df,2p)          | -311.287772 | -311.138955                                           | 0                  | 55.8         | 0.14               |
| <b>ax</b> RMP2(FC)/6-311+G(2df,2p)          | -311.287894 | -311.138736                                           | 0.137              | 44.2         |                    |
| geometry method                             | $E$ (au)    | Thermal correction to Gibbs Free Energy (au/Particle) |                    |              |                    |
| <b>eq</b> RB3LYP-D3/6-31G*                  | -312.034251 | 0.148376                                              |                    |              |                    |

**ax** RB3LYP-D3/6-31G\*      -312.033943      0.148738

| energy method                      | <i>E</i> (au) | <i>G</i> (au) | rel <i>G</i> (kcal/mol) | Population % | A-value (kcal/mol) |
|------------------------------------|---------------|---------------|-------------------------|--------------|--------------------|
| <b>eq</b> RωB97X-V/6-311+G(2df,2p) | -312.037239   | -311.888863   | 0                       | 70.7         | 0.52               |
| <b>ax</b> RωB97X-V/6-311+G(2df,2p) | -312.036774   | -311.888036   | 0.519                   | 29.3         |                    |

| geometry method             | <i>E</i> (au) | Thermal correction to Gibbs Free Energy (au/Particle) |
|-----------------------------|---------------|-------------------------------------------------------|
| <b>eq</b> RωB97X-D/6-31G(d) | -311.922982   | 0.150487                                              |
| <b>ax</b> RωB97X-D/6-31G(d) | -311.923058   | 0.150761                                              |

| energy method                       | <i>E</i> (au) | <i>G</i> (au) | rel <i>G</i> (kcal/mol) | Population % | A-value (kcal/mol) |
|-------------------------------------|---------------|---------------|-------------------------|--------------|--------------------|
| <b>eq</b> RB3LYP-D3/6-311+G(2df,2p) | -312.141875   | -311.991389   | 0                       | 81.6         | 0.88               |
| <b>ax</b> RB3LYP-D3/6-311+G(2df,2p) | -312.140747   | -311.989985   | 0.881                   | 18.4         |                    |
| <b>eq</b> RωB97X-D/6-311+G(2df,2p)  | -312.021488   | -311.871002   | 0                       | 70.7         | 0.52               |
| <b>ax</b> RωB97X-D/6-311+G(2df,2p)  | -312.020936   | -311.870174   | 0.519                   | 29.3         |                    |
| <b>eq</b> RM06-2X/6-311+G(2df,2p)   | -311.974650   | -311.824164   | 0                       | 63.4         | 0.32               |
| <b>ax</b> RM06-2X /6-311+G(2df,2p)  | -311.974409   | -311.823647   | 0.324                   | 36.6         |                    |
| <b>eq</b> RMP2(FC)/6-311+G(2df,2p)  | -311.288138   | -311.137651   | 0                       | 53.2         | 0.07               |
| <b>ax</b> RMP2(FC)/6-311+G(2df,2p)  | -311.288293   | -311.137532   | 0.074                   | 46.8         |                    |

| geometry method           | <i>E</i> (au) | Thermal correction to Gibbs Free Energy (au/Particle) |
|---------------------------|---------------|-------------------------------------------------------|
| <b>eq</b> RωB97X-D/6-31G* | -311.922982   | 0.139098                                              |
| <b>ax</b> RωB97X-D/6-31G* | -311.923057   | 0.139401                                              |

| energy method                      | <i>E</i> (au) | <i>G</i> (au) | rel <i>G</i> (kcal/mol) | Population % | A-value (kcal/mol) |
|------------------------------------|---------------|---------------|-------------------------|--------------|--------------------|
| <b>eq</b> RωB97X-V/6-311+G(2df,2p) | -312.037530   | -311.898432   | 0                       | 69.8         | 0.50               |
| <b>ax</b> RωB97X-V/6-311+G(2df,2p) | -312.037044   | -311.897643   | 0.495                   | 30.2         |                    |

| geometry method            | <i>E</i> (au) | Thermal correction to Gibbs Free Energy (au/Particle) |
|----------------------------|---------------|-------------------------------------------------------|
| <b>eq</b> RM06-2X/6-31G(d) | -311.866747   | 0.150444                                              |
| <b>ax</b> RM06-2X/6-31G(d) | -311.867080   | 0.150871                                              |

| energy method                       | <i>E</i> (au) | <i>G</i> (au) | rel <i>G</i> (kcal/mol) | Population % | A-value (kcal/mol) |
|-------------------------------------|---------------|---------------|-------------------------|--------------|--------------------|
| <b>eq</b> RB3LYP-D3/6-311+G(2df,2p) | -312.141819   | -311.991375   | 0                       | 85.5         | 1.05               |
| <b>ax</b> RB3LYP-D3/6-311+G(2df,2p) | -312.140575   | -311.989704   | 1.049                   | 14.5         |                    |
| <b>eq</b> RωB97X-D/6-311+G(2df,2p)  | -312.021499   | -311.871055   | 0                       | 75.6         | 0.67               |

|                                     |               |                                                       |                         |              |                    |
|-------------------------------------|---------------|-------------------------------------------------------|-------------------------|--------------|--------------------|
| <b>ax</b> RωB97X-D/6-311+G(2df,2p)  | -312.020861   | -311.869989                                           | 0.669                   | 24.4         |                    |
| <b>eq</b> RM06-2X/6-311+G(2df,2p)   | -311.974727   | -311.824283                                           | 0                       | 67.8         |                    |
| <b>ax</b> RM06-2X /6-311+G(2df,2p)  | -311.974454   | -311.823582                                           | 0.440                   | 32.2         | 0.44               |
| <b>eq</b> RMP2(FC)/6-311+G(2df,2p)  | -311.288268   | -311.137824                                           | 0                       | 56.4         |                    |
| <b>ax</b> RMP2(FC)/6-311+G(2df,2p)  | -311.288454   | -311.137582                                           | 0.152                   | 43.6         | 0.15               |
| geometry method                     | <i>E</i> (au) | Thermal correction to Gibbs Free Energy (au/Particle) |                         |              |                    |
| <b>eq</b> RM06-2X/6-31G*            | -311.866782   |                                                       | 0.150029                |              |                    |
| <b>ax</b> RM06-2X/6-31G*            | -311.867115   |                                                       | 0.150436                |              |                    |
| energy method                       | <i>E</i> (au) | <i>G</i> (au)                                         | rel <i>G</i> (kcal/mol) | Population % | A-value (kcal/mol) |
| <b>eq</b> RωB97X-V/6-311+G(2df,2p)  | -312.037549   | -311.887520                                           | 0                       | 73.4         |                    |
| <b>ax</b> RωB97X-V/6-311+G(2df,2p)  | -312.037002   | -311.886566                                           | 0.599                   | 26.6         | 0.60               |
| geometry method                     | <i>E</i> (au) | Thermal correction to Gibbs Free Energy (au/Particle) |                         |              |                    |
| <b>eq</b> RωB97X-V/6-31G*           | -311.936606   |                                                       | 0.150272                |              |                    |
| <b>ax</b> RωB97X-V/6-31G*           | -311.936903   |                                                       | 0.150687                |              |                    |
| energy method                       | <i>E</i> (au) | <i>G</i> (au)                                         | rel <i>G</i> (kcal/mol) | Population % | A-value (kcal/mol) |
| <b>eq</b> RB3LYP-D3/6-311+G(2df,2p) | -312.142966   | -311.992694                                           | 0                       | 85.6         |                    |
| <b>ax</b> RB3LYP-D3/6-311+G(2df,2p) | -312.141700   | -311.991013                                           | 1.055                   | 14.4         | 1.05               |
| <b>eq</b> RωB97X-D/6-311+G(2df,2p)  | -312.022574   | -311.872302                                           | 0                       | 75.8         |                    |
| <b>ax</b> RωB97X-D/6-311+G(2df,2p)  | -312.021914   | -311.871227                                           | 0.675                   | 24.2         | 0.67               |
| <b>eq</b> RM06-2X/6-311+G(2df,2p)   | -311.975827   | -311.825555                                           | 0                       | 68.5         |                    |
| <b>ax</b> RM06-2X /6-311+G(2df,2p)  | -311.975509   | -311.824822                                           | 0.460                   | 31.5         | 0.46               |
| <b>eq</b> RωB97X-V/6-311+G(2df,2p)  | -312.037369   | -311.887097                                           | 0                       | 72.7         |                    |
| <b>ax</b> RωB97X-V/6-311+G(2df,2p)  | -312.036861   | -311.886174                                           | 0.579                   | 27.3         | 0.58               |
| <b>eq</b> RMP2(FC)/6-311+G(2df,2p)  | -311.287775   | -311.137503                                           | 0                       | 56.3         |                    |
| <b>ax</b> RMP2(FC)/6-311+G(2df,2p)  | -311.287953   | -311.137266                                           | 0.149                   | 43.7         | 0.15               |
| geometry method                     | <i>E</i> (au) | Thermal correction to Gibbs Free Energy (au/Particle) |                         |              |                    |
| <b>eq</b> RMP2(FC)/6-31G(d)         | -310.909314   |                                                       | 0.150855                |              |                    |
| <b>ax</b> RMP2(FC)/6-31G(d)         | -310.910043   |                                                       | 0.151498                |              |                    |
| energy method                       | <i>E</i> (au) | <i>G</i> (au)                                         | rel <i>G</i> (kcal/mol) | Population % | A-value (kcal/mol) |
| <b>eq</b> RB3LYP-D3/6-311+G(2df,2p) | -312.140987   | -311.990131                                           | 0                       | 89.5         | 1.27               |



|                                     |               |                                                       |                         |              |                    |
|-------------------------------------|---------------|-------------------------------------------------------|-------------------------|--------------|--------------------|
| <b>ax</b> RB3LYP-D3/6-311+G(2df,2p) | -312.139613   | -311.988114                                           | 1.266                   | 10.5         |                    |
| <b>eq</b> RωB97X-D/6-311+G(2df,2p)  | -312.020545   | -311.869689                                           | 0                       | 81.2         | 0.87               |
| <b>ax</b> RωB97X-D/6-311+G(2df,2p)  | -312.019809   | -311.868310                                           | 0.865                   | 18.8         |                    |
| <b>eq</b> RM06-2X/6-311+G(2df,2p)   | -311.973733   | -311.822877                                           | 0                       | 74.3         | 0.63               |
| <b>ax</b> RM06-2X /6-311+G(2df,2p)  | -311.973374   | -311.821875                                           | 0.629                   | 25.7         |                    |
| <b>eq</b> RMP2(FC)/6-311+G(2df,2p)  | -311.288450   | -311.137594                                           | 0                       | 63.0         | 0.31               |
| <b>ax</b> RMP2(FC)/6-311+G(2df,2p)  | -311.288593   | -311.137095                                           | 0.313                   | 37.0         |                    |
| geometry method                     | <i>E</i> (au) | Thermal correction to Gibbs Free Energy (au/Particle) |                         |              |                    |
| <b>eq</b> RMP2(FC)/6-31G*           | -310.909314   | 0.150390                                              |                         |              |                    |
| <b>ax</b> RMP2(FC)/6-31G*           | -310.910044   | 0.151072                                              |                         |              |                    |
| energy method                       | <i>E</i> (au) | <i>G</i> (au)                                         | rel <i>G</i> (kcal/mol) | Population % | A-value (kcal/mol) |
| <b>eq</b> RωB97X-V/6-311+G(2df,2p)  | -312.036725   | -311.886335                                           | 0                       | 80.6         | 0.84               |
| <b>ax</b> RωB97X-V/6-311+G(2df,2p)  | -312.036065   | -311.884993                                           | 0.842                   | 19.4         |                    |
| geometry method                     | <i>E</i> (au) | <i>G</i> (au)                                         | rel <i>G</i> (kcal/mol) | Population % | A-value (kcal/mol) |
| <b>eq</b> RHF/6-311+G(d,p)          | -309.956999   | -309.797797                                           | 0                       | 89.0         | 1.23               |
| <b>ax</b> RHF/6-311+G(d,p)          | -309.955388   | -309.795833                                           | 1.232                   | 11.0         |                    |
| <b>eq</b> RB3LYP/6-311+G(d,p)       | -312.107997   | -311.961179                                           | 0                       | 86.2         | 1.08               |
| <b>ax</b> RB3LYP/6-311+G(d,p)       | -312.106500   | -311.959458                                           | 1.080                   | 13.8         |                    |
| <b>eq</b> RB3LYP-D3/6-311+G(d,p)    | -312.123714   | -311.976376                                           | 0                       | 76.8         | 0.71               |
| <b>ax</b> RB3LYP-D3/6-311+G(d,p)    | -312.122791   | -311.975250                                           | 0.707                   | 23.2         |                    |
| <b>eq</b> RωB97X-D/6-311+G(d,p)     | -312.004486   | -311.855644                                           | 0                       | 64.3         | 0.35               |
| <b>ax</b> RωB97X-D/6-311+G(d,p)     | -312.004147   | -311.855090                                           | 0.348                   | 35.7         |                    |
| <b>eq</b> RM06-2X/6-311+G(d,p)      | -311.955962   | -311.806894                                           | 0                       | 61.3         | 0.27               |
| <b>ax</b> RM06-2X/6-311+G(d,p)      | -311.955920   | -311.806460                                           | 0.272                   | 38.7         |                    |
| <b>eq</b> RωB97X-V/6-311+G**        | -312.021179   | -311.872838                                           | 0                       | 65.6         | 0.38               |
| <b>ax</b> RωB97X-V/6-311+G**        | -312.020902   | -311.872231                                           | 0.381                   | 34.4         |                    |
| <b>eq</b> RMP2(FC)/6-311+G(d,p)     | -311.117501   | -310.968891                                           | 0                       | 52.6         | 0.06               |
| <b>ax</b> RMP2(FC)/6-311+G(d,p)     | -311.117812   | -310.968794                                           | 0.061                   | 47.4         |                    |

# Cyclohexanecarbonitrile

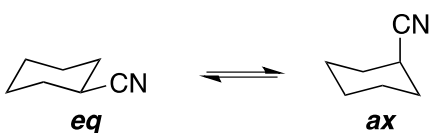

| geometry method        | $E$ (au)    | Thermal correction to Gibbs Free Energy (au/Particle) |  |  |  |
|------------------------|-------------|-------------------------------------------------------|--|--|--|
| <b>eq</b> RHF/6-31G(d) | -325.943512 | 0.150474                                              |  |  |  |
| <b>ax</b> RHF/6-31G(d) | -325.942800 | 0.150732                                              |  |  |  |

  

| energy method                               | $E$ (au)    | $G$ (au)    | rel $G$ (kcal/mol) | Population % | A-value (kcal/mol) |
|---------------------------------------------|-------------|-------------|--------------------|--------------|--------------------|
| <b>eq</b> RB3LYP-D3/6-311+G(2df,2p)         | -328.247522 | -327.097047 | 0                  | 71.2         | 0.54               |
| <b>ax</b> RB3LYP-D3/6-311+G(2df,2p)         | -328.246926 | -327.096194 | 0.535              | 28.8         |                    |
| <b>eq</b> R $\omega$ B97X-D/6-311+G(2df,2p) | -328.123690 | -327.973215 | 0                  | 61.5         | 0.28               |
| <b>ax</b> R $\omega$ B97X-D/6-311+G(2df,2p) | -328.123504 | -327.972772 | 0.278              | 38.5         |                    |
| <b>eq</b> RM06-2X/6-311+G(2df,2p)           | -328.079757 | -327.929282 | 0                  | 55.7         | 0.14               |
| <b>ax</b> RM06-2X /6-311+G(2df,2p)          | -328.079798 | -327.929066 | 0.136              | 44.3         |                    |
| <b>eq</b> RMP2(FC)/6-311+G(2df,2p)          | -327.386884 | -327.236409 | 0                  | 54.0         | 0.09               |
| <b>ax</b> RMP2(FC)/6-311+G(2df,2p)          | -327.386991 | -327.236259 | 0.094              | 46.0         |                    |

  

| geometry method      | $E$ (au)    | Thermal correction to Gibbs Free Energy (au/Particle) |  |  |  |
|----------------------|-------------|-------------------------------------------------------|--|--|--|
| <b>eq</b> RHF/6-31G* | -325.943512 | 0.150072                                              |  |  |  |
| <b>ax</b> RHF/6-31G* | -325.942800 | 0.150321                                              |  |  |  |

  

| energy method                               | $E$ (au)    | $G$ (au)    | rel $G$ (kcal/mol) | Population % | A-value (kcal/mol) |
|---------------------------------------------|-------------|-------------|--------------------|--------------|--------------------|
| <b>eq</b> R $\omega$ B97X-V/6-311+G(2df,2p) | -328.141165 | -327.991093 | 0                  | 57.9         | 0.19               |
| <b>ax</b> R $\omega$ B97X-V/6-311+G(2df,2p) | -328.141114 | -327.990793 | 0.188              | 42.1         |                    |

  

| geometry method           | $E$ (au)    | Thermal correction to Gibbs Free Energy (au/Particle) |  |  |  |
|---------------------------|-------------|-------------------------------------------------------|--|--|--|
| <b>eq</b> RB3LYP/6-31G(d) | -328.120624 | 0.138346                                              |  |  |  |
| <b>ax</b> RB3LYP/6-31G(d) | -328.119965 | 0.138588                                              |  |  |  |

  

| energy method                               | $E$ (au)    | $G$ (au)    | rel $G$ (kcal/mol) | Population % | A-value (kcal/mol) |
|---------------------------------------------|-------------|-------------|--------------------|--------------|--------------------|
| <b>eq</b> RB3LYP-D3/6-311+G(2df,2p)         | -328.247845 | -328.109499 | 0                  | 71.4         | 0.54               |
| <b>ax</b> RB3LYP-D3/6-311+G(2df,2p)         | -328.247226 | -328.108638 | 0.540              | 28.6         |                    |
| <b>eq</b> R $\omega$ B97X-D/6-311+G(2df,2p) | -328.123396 | -327.985050 | 0                  | 60.7         | 0.26               |
| <b>ax</b> R $\omega$ B97X-D/6-311+G(2df,2p) | -328.123227 | -327.984639 | 0.258              | 39.3         |                    |

|                                     |               |                                                       |                         |              |                    |
|-------------------------------------|---------------|-------------------------------------------------------|-------------------------|--------------|--------------------|
| <b>eq</b> RM06-2X/6-311+G(2df,2p)   | -328.079251   | -327.940905                                           | 0                       | 53.7         |                    |
| <b>ax</b> RM06-2X /6-311+G(2df,2p)  | -328.079355   | -327.940768                                           | 0.086                   | 46.3         | 0.09               |
| <b>eq</b> RMP2(FC)/6-311+G(2df,2p)  | -327.388735   | -327.250389                                           | 0                       | 50.7         |                    |
| <b>ax</b> RMP2(FC)/6-311+G(2df,2p)  | -327.388951   | -327.250364                                           | 0.016                   | 49.3         | 0.02               |
| geometry method                     | <i>E</i> (au) | Thermal correction to Gibbs Free Energy (au/Particle) |                         |              |                    |
| <b>eq</b> RB3LYP/6-31G*             | -328.120631   | 0.129469                                              |                         |              |                    |
| <b>ax</b> RB3LYP/6-31G*             | -328.119966   | 0.129682                                              |                         |              |                    |
| energy method                       | <i>E</i> (au) | <i>G</i> (au)                                         | rel <i>G</i> (kcal/mol) | Population % | A-value (kcal/mol) |
| <b>eq</b> RωB97X-V/6-311+G(2df,2p)  | -328.141627   | -328.012158                                           | 0                       | 55.7         |                    |
| <b>ax</b> RωB97X-V/6-311+G(2df,2p)  | -328.141624   | -328.011942                                           | 0.136                   | 44.3         | 0.14               |
| geometry method                     | <i>E</i> (au) | Thermal correction to Gibbs Free Energy (au/Particle) |                         |              |                    |
| <b>eq</b> RB3LYP-D3/6-31G(d)        | -328.136068   | 0.138875                                              |                         |              |                    |
| <b>ax</b> RB3LYP-D3/6-31G(d)        | -328.136004   | 0.139106                                              |                         |              |                    |
| energy method                       | <i>E</i> (au) | <i>G</i> (au)                                         | rel <i>G</i> (kcal/mol) | Population % | A-value (kcal/mol) |
| <b>eq</b> RB3LYP-D3/6-311+G(2df,2p) | -328.247903   | -328.109028                                           | 0                       | 72.3         |                    |
| <b>ax</b> RB3LYP-D3/6-311+G(2df,2p) | -328.247228   | -328.108122                                           | 0.568                   | 27.7         | 0.57               |
| <b>eq</b> RωB97X-D/6-311+G(2df,2p)  | -328.123480   | -327.984605                                           | 0                       | 61.4         |                    |
| <b>ax</b> RωB97X-D/6-311+G(2df,2p)  | -328.123273   | -327.984167                                           | 0.274                   | 38.6         | 0.27               |
| <b>eq</b> RM06-2X/6-311+G(2df,2p)   | -328.079400   | -327.940525                                           | 0                       | 53.2         |                    |
| <b>ax</b> RM06-2X /6-311+G(2df,2p)  | -328.079509   | -327.940403                                           | 0.076                   | 46.8         | 0.08               |
| <b>eq</b> RMP2(FC)/6-311+G(2df,2p)  | -327.388883   | -327.250008                                           | 0.047                   | 49.5         |                    |
| <b>ax</b> RMP2(FC)/6-311+G(2df,2p)  | -327.389131   | -327.250025                                           | 0                       | 50.5         | -0.01              |
| geometry method                     | <i>E</i> (au) | Thermal correction to Gibbs Free Energy (au/Particle) |                         |              |                    |
| <b>eq</b> RB3LYP-D3/6-31G*          | -328.136067   | 0.138440                                              |                         |              |                    |
| <b>ax</b> RB3LYP-D3/6-31G*          | -328.136005   | 0.138687                                              |                         |              |                    |
| energy method                       | <i>E</i> (au) | <i>G</i> (au)                                         | rel <i>G</i> (kcal/mol) | Population % | A-value (kcal/mol) |
| <b>eq</b> RωB97X-V/6-311+G(2df,2p)  | -328.141714   | -328.003274                                           | 0                       | 56.8         |                    |
| <b>ax</b> RωB97X-V/6-311+G(2df,2p)  | -328.141705   | -328.003018                                           | 0.161                   | 43.2         | 0.16               |
| geometry method                     | <i>E</i> (au) | Thermal correction to Gibbs Free Energy (au/Particle) |                         |              |                    |

**eq** R**w**B97X-D/6-31G(d) -328.020962 0.140316

**ax** R**w**B97X-D/6-31G(d) -328.021264 0.140556

| energy method                               | <i>E</i> (au) | <i>G</i> (au) | rel <i>G</i> (kcal/mol) | Population % | A-value (kcal/mol) |
|---------------------------------------------|---------------|---------------|-------------------------|--------------|--------------------|
| <b>eq</b> RB3LYP-D3/6-311+G(2df,2p)         | -328.248150   | -328.107833   | 0                       | 73.0         | 0.59               |
| <b>ax</b> RB3LYP-D3/6-311+G(2df,2p)         | -328.247452   | -328.106896   | 0.588                   | 27.0         |                    |
| <b>eq</b> R <b>w</b> B97X-D/6-311+G(2df,2p) | -328.123978   | -327.983662   | 0                       | 61.9         | 0.29               |
| <b>ax</b> R <b>w</b> B97X-D/6-311+G(2df,2p) | -328.123760   | -327.983204   | 0.287                   | 38.1         |                    |
| <b>eq</b> RM06-2X/6-311+G(2df,2p)           | -328.079922   | -327.939606   | 0                       | 52.5         | 0.06               |
| <b>ax</b> RM06-2X /6-311+G(2df,2p)          | -328.080070   | -327.939513   | 0.058                   | 47.5         |                    |
| <b>eq</b> RMP2(FC)/6-311+G(2df,2p)          | -327.389212   | -327.248895   | 0.036                   | 48.5         | -004               |
| <b>ax</b> RMP2(FC)/6-311+G(2df,2p)          | -327.389509   | -327.248953   | 0                       | 51.5         |                    |

geometry method *E* (au) Thermal correction to Gibbs Free Energy (au/Particle)

**eq** R**w**B97X-D/6-31G\* -328.020970 0.129537

**ax** R**w**B97X-D/6-31G\* -328.021266 0.129759

| energy method                               | <i>E</i> (au) | <i>G</i> (au) | rel <i>G</i> (kcal/mol) | Population % | A-value (kcal/mol) |
|---------------------------------------------|---------------|---------------|-------------------------|--------------|--------------------|
| <b>eq</b> R <b>w</b> B97X-V/6-311+G(2df,2p) | -328.142089   | -328.012552   | 0                       | 56.5         | 0.15               |
| <b>ax</b> R <b>w</b> B97X-V/6-311+G(2df,2p) | -328.142064   | -328.012305   | 0.155                   | 43.5         |                    |

geometry method *E* (au) Thermal correction to Gibbs Free Energy (au/Particle)

**eq** RM06-2X/6-31G(d) -327.867782 0.137424

**ax** RM06-2X/6-31G(d) -327.868348 0.137835

| energy method                               | <i>E</i> (au) | <i>G</i> (au) | rel <i>G</i> (kcal/mol) | Population % | A-value (kcal/mol) |
|---------------------------------------------|---------------|---------------|-------------------------|--------------|--------------------|
| <b>eq</b> RB3LYP-D3/6-311+G(2df,2p)         | -328.247511   | -328.110088   | 0                       | 76.7         | 0.70               |
| <b>ax</b> RB3LYP-D3/6-311+G(2df,2p)         | -328.246800   | -328.108966   | 0.704                   | 23.3         |                    |
| <b>eq</b> R <b>w</b> B97X-D/6-311+G(2df,2p) | -328.123505   | -327.986081   | 0                       | 66.0         | 0.39               |
| <b>ax</b> R <b>w</b> B97X-D/6-311+G(2df,2p) | -328.123292   | -327.985458   | 0.391                   | 34.0         |                    |
| <b>eq</b> RM06-2X/6-311+G(2df,2p)           | -328.079467   | -327.942043   | 0                       | 56.6         | 0.16               |
| <b>ax</b> RM06-2X /6-311+G(2df,2p)          | -328.079627   | -327.941792   | 0.157                   | 43.4         |                    |
| <b>eq</b> RMP2(FC)/6-311+G(2df,2p)          | -327.389266   | -327.251843   | 0                       | 52.3         | 0.05               |
| <b>ax</b> RMP2(FC)/6-311+G(2df,2p)          | -327.389591   | -327.251757   | 0.054                   | 47.7         |                    |

geometry method *E* (au) Thermal correction to Gibbs Free Energy (au/Particle)

**eq** RM06-2X/6-31G\* -327.967471 0.139751

**ax** RM06-2X/6-31G\* -327.968108 0.140023

| energy method | <i>E</i> (au) | <i>G</i> (au) | rel <i>G</i> (kcal/mol) | Population % | A-value (kcal/mol) |
|---------------|---------------|---------------|-------------------------|--------------|--------------------|
|---------------|---------------|---------------|-------------------------|--------------|--------------------|

**eq** RωB97X-V/6-311+G(2df,2p) -328.142172 -328.002421 0 59.9 0.24

**ax** RωB97X-V/6-311+G(2df,2p) -328.142066 -328.002043 0.237 40.1

| geometry method | <i>E</i> (au) | Thermal correction to Gibbs Free Energy (au/Particle) |
|-----------------|---------------|-------------------------------------------------------|
|-----------------|---------------|-------------------------------------------------------|

**eq** RωB97X-V/6-31G\* -328.035963 0.139996

**ax** RωB97X-V/6-31G\* -328.036512 0.140296

| energy method | <i>E</i> (au) | <i>G</i> (au) | rel <i>G</i> (kcal/mol) | Population % | A-value (kcal/mol) |
|---------------|---------------|---------------|-------------------------|--------------|--------------------|
|---------------|---------------|---------------|-------------------------|--------------|--------------------|

**eq** RB3LYP-D3/6-311+G(2df,2p) -328.249681 -328.109685 0 75.9 0.68

**ax** RB3LYP-D3/6-311+G(2df,2p) -328.248900 -328.108604 0.678 24.1

**eq** RωB97X-D/6-311+G(2df,2p) -328.125410 -327.985414 0 64.5 0.35

**ax** RωB97X-D/6-311+G(2df,2p) -328.125146 -327.984850 0.354 35.5

**eq** RM06-2X/6-311+G(2df,2p) -328.081406 -327.941410 0 54.6 0.11

**ax** RM06-2X /6-311+G(2df,2p) -328.081533 -327.941237 0.109 45.4

**eq** RωB97X-V/6-311+G(2df,2p) -328.141896 -328.001900 0 59.2 0.22

**ax** RωB97X-V/6-311+G(2df,2p) -328.141846 -328.001550 0.220 40.8

**eq** RMP2(FC)/6-311+G(2df,2p) -327.388874 -327.248878 0.013 49.4 -0.01

**ax** RMP2(FC)/6-311+G(2df,2p) -327.389195 -327.248899 0 50.6

| geometry method | <i>E</i> (au) | Thermal correction to Gibbs Free Energy (au/Particle) |
|-----------------|---------------|-------------------------------------------------------|
|-----------------|---------------|-------------------------------------------------------|

**eq** RMP2(FC)/6-31G(d) -327.005224 0.141341

**ax** RMP2(FC)/6-31G(d) -327.006175 0.141681

| energy method | <i>E</i> (au) | <i>G</i> (au) | rel <i>G</i> (kcal/mol) | Population % | A-value (kcal/mol) |
|---------------|---------------|---------------|-------------------------|--------------|--------------------|
|---------------|---------------|---------------|-------------------------|--------------|--------------------|

**eq** RB3LYP-D3/6-311+G(2df,2p) -328.246144 -328.104802 0 79.2 0.79

**ax** RB3LYP-D3/6-311+G(2df,2p) -328.246144 -328.103541 0.791 20.8

**eq** RωB97X-D/6-311+G(2df,2p) -328.121760 -327.980418 0 67.7 0.44

**ax** RωB97X-D/6-311+G(2df,2p) -328.121403 -327.979722 0.437 32.3

**eq** RM06-2X/6-311+G(2df,2p) -328.077577 -327.936236 0 56.4 0.15

**ax** RM06-2X /6-311+G(2df,2p) -328.077674 -327.935992 0.153 43.6

**eq** RMP2(FC)/6-311+G(2df,2p) -327.389420 -327.248078 0 50.5 0.01

|                                    |               |                                                       |                         |              |                    |
|------------------------------------|---------------|-------------------------------------------------------|-------------------------|--------------|--------------------|
| <b>ax</b> RMP2(FC)/6-311+G(2df,2p) | -327.389742   | -327.248060                                           | 0.011                   | 49.5         |                    |
| geometry method                    | <i>E</i> (au) | Thermal correction to Gibbs Free Energy (au/Particle) |                         |              |                    |
| <b>eq</b> RMP2(FC)/6-31G*          | -327.005224   |                                                       | 0.140915                |              |                    |
| <b>ax</b> RMP2(FC)/6-31G*          | -327.006175   |                                                       | 0.141255                |              |                    |
| energy method                      | <i>E</i> (au) | <i>G</i> (au)                                         | rel <i>G</i> (kcal/mol) | Population % | A-value (kcal/mol) |
| <b>eq</b> RωB97X-V/6-311+G(2df,2p) | -328.140046   | -327.999131                                           | 0                       | 62.4         | 0.30               |
| <b>ax</b> RωB97X-V/6-311+G(2df,2p) | -328.139911   | -327.998656                                           | 0.298                   | 37.6         |                    |
| geometry method                    | <i>E</i> (au) | <i>G</i> (au)                                         | rel <i>G</i> (kcal/mol) | Population % | A-value (kcal/mol) |
| <b>eq</b> RHF/6-311+G(d,p)         | -326.025853   | -325.877513                                           | 0                       | 80.5         | 0.84               |
| <b>ax</b> RHF/6-311+G(d,p)         | -326.024715   | -325.876179                                           | 0.837                   | 19.5         |                    |
| <b>eq</b> RB3LYP/6-311+G(d,p)      | -328.214465   | -328.077674                                           | 0                       | 77.7         | 0.74               |
| <b>ax</b> RB3LYP/6-311+G(d,p)      | -328.213418   | -328.076499                                           | 0.737                   | 22.3         |                    |
| <b>eq</b> RB3LYP-D3/6-311+G(d,p)   | -328.229921   | -328.092690                                           | 0                       | 67.5         | 0.43               |
| <b>ax</b> RB3LYP-D3/6-311+G(d,p)   | -328.229404   | -328.092001                                           | 0.432                   | 32.5         |                    |
| <b>eq</b> RωB97X-D/6-311+G(d,p)    | -328.106896   | -327.968306                                           | 0                       | 54.8         | 0.11               |
| <b>ax</b> RωB97X-D/6-311+G(d,p)    | -328.106871   | -327.968125                                           | 0.114                   | 45.2         |                    |
| <b>eq</b> RM06-2X/6-311+G(d,p)     | -328.061862   | -327.923065                                           | 0.074                   | 46.9         | -0.07              |
| <b>ax</b> RM06-2X/6-311+G(d,p)     | -328.062196   | -327.923183                                           | 0                       | 53.1         |                    |
| <b>eq</b> RωB97X-V/6-311+G**       | -328.125546   | -327.987441                                           | 0                       | 51.7         | 0.04               |
| <b>ax</b> RωB97X-V/6-311+G**       | -328.125735   | -327.987376                                           | 0.041                   | 48.3         |                    |
| <b>eq</b> RMP2(FC)/6-311+G(d,p)    | -327.213261   | -327.074782                                           | 0.099                   | 45.8         | -0.10              |
| <b>ax</b> RMP2(FC)/6-311+G(d,p)    | -327.213677   | -327.074939                                           | 0                       | 54.2         |                    |

## Fluorocyclohexane

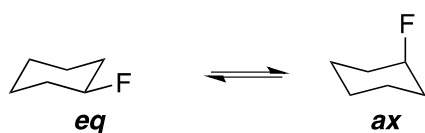

| geometry method        | $E$ (au)    | Thermal correction to Gibbs Free Energy (au/Particle) |  |  |  |
|------------------------|-------------|-------------------------------------------------------|--|--|--|
| <b>eq</b> RHF/6-31G(d) | -333.063777 | 0.144765                                              |  |  |  |
| <b>ax</b> RHF/6-31G(d) | -333.064194 | 0.144984                                              |  |  |  |

  

| energy method                               | $E$ (au)    | $G$ (au)    | rel $G$ (kcal/mol) | Population % | A-value (kcal/mol) |
|---------------------------------------------|-------------|-------------|--------------------|--------------|--------------------|
| <b>eq</b> RB3LYP-D3/6-311+G(2df,2p)         | -335.250627 | -335.105861 | 0                  | 68.5         | 0.46               |
| <b>ax</b> RB3LYP-D3/6-311+G(2df,2p)         | -335.250115 | -335.105131 | 0.459              | 31.5         |                    |
| <b>eq</b> R $\omega$ B97X-D/6-311+G(2df,2p) | -335.135742 | -334.990977 | 0                  | 70.4         | 0.51               |
| <b>ax</b> R $\omega$ B97X-D/6-311+G(2df,2p) | -335.135150 | -334.990161 | 0.512              | 29.6         |                    |
| <b>eq</b> RM06-2X/6-311+G(2df,2p)           | -335.082273 | -334.937508 | 0                  | 61.2         | 0.27               |
| <b>ax</b> RM06-2X /6-311+G(2df,2p)          | -335.082062 | -334.937077 | 0.270              | 38.8         |                    |
| <b>eq</b> RMP2(FC)/6-311+G(2df,2p)          | -334.433731 | -334.288966 | 0                  | 63.7         | 0.33               |
| <b>ax</b> RMP2(FC)/6-311+G(2df,2p)          | -334.433419 | -334.288435 | 0.333              | 36.3         |                    |

  

| geometry method      | $E$ (au)    | Thermal correction to Gibbs Free Energy (au/Particle) |  |  |  |
|----------------------|-------------|-------------------------------------------------------|--|--|--|
| <b>eq</b> RHF/6-31G* | -333.063777 | 0.144570                                              |  |  |  |
| <b>ax</b> RHF/6-31G* | -333.064194 | 0.144745                                              |  |  |  |

  

| energy method                               | $E$ (au)    | $G$ (au)    | rel $G$ (kcal/mol) | Population % | A-value (kcal/mol) |
|---------------------------------------------|-------------|-------------|--------------------|--------------|--------------------|
| <b>eq</b> R $\omega$ B97X-V/6-311+G(2df,2p) | -335.139234 | -334.994664 | 0                  | 60.5         | 0.25               |
| <b>ax</b> R $\omega$ B97X-V/6-311+G(2df,2p) | -335.139008 | -334.994263 | 0.252              | 39.5         |                    |

  

| geometry method           | $E$ (au)    | Thermal correction to Gibbs Free Energy (au/Particle) |  |  |  |
|---------------------------|-------------|-------------------------------------------------------|--|--|--|
| <b>eq</b> RB3LYP/6-31G(d) | -335.114886 | 0.133372                                              |  |  |  |
| <b>ax</b> RB3LYP/6-31G(d) | -335.115171 | 0.133570                                              |  |  |  |

  

| energy method                               | $E$ (au)    | $G$ (au)    | rel $G$ (kcal/mol) | Population % | A-value (kcal/mol) |
|---------------------------------------------|-------------|-------------|--------------------|--------------|--------------------|
| <b>eq</b> RB3LYP-D3/6-311+G(2df,2p)         | -335.251176 | -335.117804 | 0                  | 68.2         | 0.45               |
| <b>ax</b> RB3LYP-D3/6-311+G(2df,2p)         | -335.250654 | -335.117084 | 0.452              | 31.8         |                    |
| <b>eq</b> R $\omega$ B97X-D/6-311+G(2df,2p) | -335.135744 | -335.002373 | 0                  | 70.8         | 0.52               |
| <b>ax</b> R $\omega$ B97X-D/6-311+G(2df,2p) | -335.135111 | -335.001541 | 0.522              | 29.2         |                    |

|                                     |               |                                                       |                         |              |                    |
|-------------------------------------|---------------|-------------------------------------------------------|-------------------------|--------------|--------------------|
| <b>eq</b> RM06-2X/6-311+G(2df,2p)   | -335.082090   | -334.948718                                           | 0                       | 61.1         |                    |
| <b>ax</b> RM06-2X /6-311+G(2df,2p)  | -335.081862   | -334.948292                                           | 0.267                   | 38.9         | 0.27               |
| <b>eq</b> RMP2(FC)/6-311+G(2df,2p)  | -334.433511   | -334.300139                                           | 0                       | 64.0         |                    |
| <b>ax</b> RMP2(FC)/6-311+G(2df,2p)  | -334.433167   | -334.299597                                           | 0.341                   | 36.0         | 0.34               |
| geometry method                     | <i>E</i> (au) | Thermal correction to Gibbs Free Energy (au/Particle) |                         |              |                    |
| <b>eq</b> RB3LYP/6-31G*             | -335.114892   | 0.125099                                              |                         |              |                    |
| <b>ax</b> RB3LYP/6-31G*             | -335.115156   | 0.125175                                              |                         |              |                    |
| energy method                       | <i>E</i> (au) | <i>G</i> (au)                                         | rel <i>G</i> (kcal/mol) | Population % | A-value (kcal/mol) |
| <b>eq</b> RωB97X-V/6-311+G(2df,2p)  | -335.140002   | -335.014903                                           | 0                       | 58.0         |                    |
| <b>ax</b> RωB97X-V/6-311+G(2df,2p)  | -335.139774   | -335.014599                                           | 0.191                   | 42.0         | 0.19               |
| geometry method                     | <i>E</i> (au) | Thermal correction to Gibbs Free Energy (au/Particle) |                         |              |                    |
| <b>eq</b> RB3LYP-D3/6-31G(d)        | -335.128963   | 0.133776                                              |                         |              |                    |
| <b>ax</b> RB3LYP-D3/6-31G(d)        | -335.129540   | 0.133927                                              |                         |              |                    |
| energy method                       | <i>E</i> (au) | <i>G</i> (au)                                         | rel <i>G</i> (kcal/mol) | Population % | A-value (kcal/mol) |
| <b>eq</b> RB3LYP-D3/6-311+G(2df,2p) | -335.251188   | -335.117412                                           | 0                       | 69.7         |                    |
| <b>ax</b> RB3LYP-D3/6-311+G(2df,2p) | -335.250555   | -335.116628                                           | 0.412                   | 30.3         | 0.49               |
| <b>eq</b> RωB97X-D/6-311+G(2df,2p)  | -335.135777   | -335.002001                                           | 0                       | 72.6         |                    |
| <b>ax</b> RωB97X-D/6-311+G(2df,2p)  | -335.135011   | -335.001084                                           | 0.575                   | 27.4         | 0.58               |
| <b>eq</b> RM06-2X/6-311+G(2df,2p)   | -335.082179   | -334.948403                                           | 0                       | 61.6         |                    |
| <b>ax</b> RM06-2X /6-311+G(2df,2p)  | -335.081883   | -334.947956                                           | 0.280                   | 38.4         | 0.28               |
| <b>eq</b> RMP2(FC)/6-311+G(2df,2p)  | -334.433629   | -334.299853                                           | 0                       | 64.3         |                    |
| <b>ax</b> RMP2(FC)/6-311+G(2df,2p)  | -334.433226   | -334.299298                                           | 0.348                   | 35.7         | 0.35               |
| geometry method                     | <i>E</i> (au) | Thermal correction to Gibbs Free Energy (au/Particle) |                         |              |                    |
| <b>eq</b> RB3LYP-D3/6-31G*          | -335.128963   | 0.133580                                              |                         |              |                    |
| <b>ax</b> RB3LYP-D3/6-31G*          | -335.129539   | 0.133687                                              |                         |              |                    |
| energy method                       | <i>E</i> (au) | <i>G</i> (au)                                         | rel <i>G</i> (kcal/mol) | Population % | A-value (kcal/mol) |
| <b>eq</b> RωB97X-V/6-311+G(2df,2p)  | -335.140053   | -335.006473                                           | 0                       | 61.4         |                    |
| <b>ax</b> RωB97X-V/6-311+G(2df,2p)  | -335.139723   | -335.006036                                           | 0.274                   | 38.6         | 0.27               |
| geometry method                     | <i>E</i> (au) | Thermal correction to Gibbs Free Energy (au/Particle) |                         |              |                    |



**eq** R**w**B97X-D/6-31G(d) -335.023149 0.135282

**ax** R**w**B97X-D/6-31G(d) -335.023266 0.135375

| energy method                               | <i>E</i> (au) | <i>G</i> (au) | rel <i>G</i> (kcal/mol) | Population % | A-value (kcal/mol) |
|---------------------------------------------|---------------|---------------|-------------------------|--------------|--------------------|
| <b>eq</b> RB3LYP-D3/6-311+G(2df,2p)         | -335.251200   | -335.115919   | 0                       | 66.1         | 0.39               |
| <b>ax</b> RB3LYP-D3/6-311+G(2df,2p)         | -335.25067    | -335.115292   | 0.393                   | 33.9         |                    |
| <b>eq</b> R <b>w</b> B97X-D/6-311+G(2df,2p) | -335.136081   | -335.000799   | 0                       | 69.0         | 0.47               |
| <b>ax</b> R <b>w</b> B97X-D/6-311+G(2df,2p) | -335.135420   | -335.000046   | 0.473                   | 31.0         |                    |
| <b>eq</b> RM06-2X/6-311+G(2df,2p)           | -335.082539   | -334.947257   | 0                       | 59.4         | 0.23               |
| <b>ax</b> RM06-2X /6-311+G(2df,2p)          | -335.082273   | -334.946898   | 0.225                   | 40.6         |                    |
| <b>eq</b> RMP2(FC)/6-311+G(2df,2p)          | -334.434020   | -334.298739   | 0                       | 62.5         | 0.30               |
| <b>ax</b> RMP2(FC)/6-311+G(2df,2p)          | -334.433632   | -334.298257   | 0.302                   | 37.5         |                    |

| geometry method                    | <i>E</i> (au) | Thermal correction to Gibbs Free Energy (au/Particle) |
|------------------------------------|---------------|-------------------------------------------------------|
| <b>eq</b> R <b>w</b> B97X-D/6-31G* | -335.023150   | 0.125202                                              |
| <b>ax</b> R <b>w</b> B97X-D/6-31G* | -335.023264   | 0.125236                                              |

| energy method                               | <i>E</i> (au) | <i>G</i> (au) | rel <i>G</i> (kcal/mol) | Population % | A-value (kcal/mol) |
|---------------------------------------------|---------------|---------------|-------------------------|--------------|--------------------|
| <b>eq</b> R <b>w</b> B97X-V/6-311+G(2df,2p) | -335.140157   | -335.014955   | 0                       | 57.9         | 0.19               |
| <b>ax</b> R <b>w</b> B97X-V/6-311+G(2df,2p) | -335.139890   | -335.014654   | 0.189                   | 42.1         |                    |

| geometry method            | <i>E</i> (au) | Thermal correction to Gibbs Free Energy (au/Particle) |
|----------------------------|---------------|-------------------------------------------------------|
| <b>eq</b> RM06-2X/6-31G(d) | -334.959863   | 0.135018                                              |
| <b>ax</b> RM06-2X/6-31G(d) | -334.960517   | 0.135315                                              |

| energy method                               | <i>E</i> (au) | <i>G</i> (au) | rel <i>G</i> (kcal/mol) | Population % | A-value (kcal/mol) |
|---------------------------------------------|---------------|---------------|-------------------------|--------------|--------------------|
| <b>eq</b> RB3LYP-D3/6-311+G(2df,2p)         | -335.251060   | -335.116042   | 0                       | 75.6         | 0.67               |
| <b>ax</b> RB3LYP-D3/6-311+G(2df,2p)         | -335.250292   | -335.114977   | 0.669                   | 24.4         |                    |
| <b>eq</b> R <b>w</b> B97X-D/6-311+G(2df,2p) | -335.136042   | -335.001024   | 0                       | 79.1         | 0.79               |
| <b>ax</b> R <b>w</b> B97X-D/6-311+G(2df,2p) | -335.135087   | -334.999772   | 0.786                   | 20.9         |                    |
| <b>eq</b> RM06-2X/6-311+G(2df,2p)           | -335.082597   | -334.947579   | 0                       | 67.2         | 0.42               |
| <b>ax</b> RM06-2X /6-311+G(2df,2p)          | -335.082218   | -334.946903   | 0.424                   | 32.8         |                    |
| <b>eq</b> RMP2(FC)/6-311+G(2df,2p)          | -334.434090   | -334.299071   | 0                       | 70.2         | 0.51               |
| <b>ax</b> RMP2(FC)/6-311+G(2df,2p)          | -334.433580   | -334.298264   | 0.507                   | 29.8         |                    |

| geometry method | <i>E</i> (au) | Thermal correction to Gibbs Free Energy (au/Particle) |
|-----------------|---------------|-------------------------------------------------------|
|-----------------|---------------|-------------------------------------------------------|

**eq** RM06-2X/6-31G\* -334.959914 0.134883

**ax** RM06-2X/6-31G\* -334.960530 0.134998

| energy method | <i>E</i> (au) | <i>G</i> (au) | rel <i>G</i> (kcal/mol) | Population % | A-value (kcal/mol) |
|---------------|---------------|---------------|-------------------------|--------------|--------------------|
|---------------|---------------|---------------|-------------------------|--------------|--------------------|

**eq** RωB97X-V/6-311+G(2df,2p) -335.140082 -335.005199 0 65.3 0.37

**ax** RωB97X-V/6-311+G(2df,2p) -335.139603 -335.004605 0.373 34.7

| geometry method | <i>E</i> (au) | Thermal correction to Gibbs Free Energy (au/Particle) |  |  |  |
|-----------------|---------------|-------------------------------------------------------|--|--|--|
|-----------------|---------------|-------------------------------------------------------|--|--|--|

**eq** RωB97X-V/6-31G\* -335.023246 0.135076

**ax** RωB97X-V/6-31G\* -335.024098 0.135253

| energy method | <i>E</i> (au) | <i>G</i> (au) | rel <i>G</i> (kcal/mol) | Population % | A-value (kcal/mol) |
|---------------|---------------|---------------|-------------------------|--------------|--------------------|
|---------------|---------------|---------------|-------------------------|--------------|--------------------|

**eq** RB3LYP-D3/6-311+G(2df,2p) -335.252175 -335.117099 0 73.7 0.61

**ax** RB3LYP-D3/6-311+G(2df,2p) -335.251381 -335.116128 0.609 26.3

**eq** RωB97X-D/6-311+G(2df,2p) -335.136924 -335.001848 0 76.4 0.69

**ax** RωB97X-D/6-311+G(2df,2p) -335.135996 -335.000743 0.693 23.6

**eq** RM06-2X/6-311+G(2df,2p) -335.083443 -334.948367 0 65.2 0.37

**ax** RM06-2X /6-311+G(2df,2p) -335.083027 -334.947774 0.372 34.8

**eq** RωB97X-V/6-311+G(2df,2p) -335.140065 -335.004989 0 65.2 0.37

**ax** RωB97X-V/6-311+G(2df,2p) -335.139651 -335.004398 0.371 34.8

**eq** RMP2(FC)/6-311+G(2df,2p) -334.433705 -334.298629 0 66.5 0.40

**ax** RMP2(FC)/6-311+G(2df,2p) -334.433237 -334.297984 0.405 33.5

| geometry method | <i>E</i> (au) | Thermal correction to Gibbs Free Energy (au/Particle) |  |  |  |
|-----------------|---------------|-------------------------------------------------------|--|--|--|
|-----------------|---------------|-------------------------------------------------------|--|--|--|

**eq** RMP2(FC)/6-31G(d) -334.014691 0.137063

**ax** RMP2(FC)/6-31G(d) -334.015810 0.137361

| energy method | <i>E</i> (au) | <i>G</i> (au) | rel <i>G</i> (kcal/mol) | Population % | A-value (kcal/mol) |
|---------------|---------------|---------------|-------------------------|--------------|--------------------|
|---------------|---------------|---------------|-------------------------|--------------|--------------------|

**eq** RB3LYP-D3/6-311+G(2df,2p) -335.251354 -335.114291 0 75.3 0.66

**ax** RB3LYP-D3/6-311+G(2df,2p) -335.250601 -335.113240 0.659 24.7

**eq** RωB97X-D/6-311+G(2df,2p) -335.136111 -334.999048 0 78.1 0.75

**ax** RωB97X-D/6-311+G(2df,2p) -335.135211 -334.997850 0.751 21.9

**eq** RM06-2X/6-311+G(2df,2p) -335.082537 -334.945474 0 67.0 0.42

**ax** RM06-2X /6-311+G(2df,2p) -335.082168 -334.944807 0.419 33.0

**eq** RMP2(FC)/6-311+G(2df,2p) -334.434231 -334.297169 0 70.6 0.52

|                                    |               |                                                       |                         |              |                    |
|------------------------------------|---------------|-------------------------------------------------------|-------------------------|--------------|--------------------|
| <b>ax</b> RMP2(FC)/6-311+G(2df,2p) | -334.433703   | -334.296343                                           | 0.518                   | 29.4         |                    |
| geometry method                    | <i>E</i> (au) | Thermal correction to Gibbs Free Energy (au/Particle) |                         |              |                    |
| <b>eq</b> RMP2(FC)/6-31G*          | -334.014691   |                                                       | 0.136872                |              |                    |
| <b>ax</b> RMP2(FC)/6-31G*          | -334.015810   |                                                       | 0.137136                |              |                    |
| energy method                      | <i>E</i> (au) | <i>G</i> (au)                                         | rel <i>G</i> (kcal/mol) | Population % | A-value (kcal/mol) |
| <b>eq</b> RωB97X-V/6-311+G(2df,2p) | -335.140300   | -335.003428                                           | 0                       | 68.3         | 0.45               |
| <b>ax</b> RωB97X-V/6-311+G(2df,2p) | -335.139841   | -335.002705                                           | 0.454                   | 31.7         |                    |
| geometry method                    | <i>E</i> (au) | <i>G</i> (au)                                         | rel <i>G</i> (kcal/mol) | Population % | A-value (kcal/mol) |
| <b>eq</b> RHF/6-311+G(d,p)         | -333.155283   | -333.012730                                           | 0                       | 63.2         | 0.32               |
| <b>ax</b> RHF/6-311+G(d,p)         | -333.154872   | -333.012221                                           | 0.319                   | 36.8         |                    |
| <b>eq</b> RB3LYP/6-311+G(d,p)      | -335.220229   | -335.088647                                           | 0                       | 66.1         | 0.39               |
| <b>ax</b> RB3LYP/6-311+G(d,p)      | -335.219647   | -335.088018                                           | 0.395                   | 33.9         |                    |
| <b>eq</b> RB3LYP-D3/6-311+G(d,p)   | -335.234271   | -335.102318                                           | 0                       | 59.1         | 0.22               |
| <b>ax</b> RB3LYP-D3/6-311+G(d,p)   | -335.233851   | -335.101970                                           | 0.218                   | 40.9         |                    |
| <b>eq</b> RωB97X-D/6-311+G(d,p)    | -335.119729   | -334.986381                                           | 0                       | 63.8         | 0.33               |
| <b>ax</b> RωB97X-D/6-311+G(d,p)    | -335.119275   | -334.985849                                           | 0.334                   | 36.2         |                    |
| <b>eq</b> RM06-2X/6-311+G(d,p)     | -335.065550   | -334.932010                                           | 0                       | 55.7         | 0.13               |
| <b>ax</b> RM06-2X/6-311+G(d,p)     | -335.065394   | -334.931795                                           | 0.135                   | 44.3         |                    |
| <b>eq</b> RωB97X-V/6-311+G**       | -335.124762   | -334.991781                                           | 0                       | 52.0         | 0.05               |
| <b>ax</b> RωB97X-V/6-311+G**       | -335.124646   | -334.991706                                           | 0.047                   | 48.0         |                    |
| <b>eq</b> RMP2(FC)/6-311+G(d,p)    | -334.256015   | -334.121816                                           | 0                       | 64.9         | 0.36               |
| <b>ax</b> RMP2(FC)/6-311+G(d,p)    | -334.255536   | -334.121236                                           | 0.364                   | 35.1         |                    |

# Chlorocyclohexane

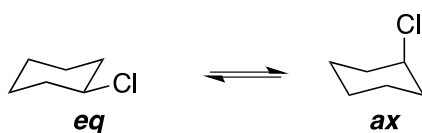

| geometry method        | $E$ (au)    | Thermal correction to Gibbs Free Energy (au/Particle) |  |  |  |
|------------------------|-------------|-------------------------------------------------------|--|--|--|
| <b>eq</b> RHF/6-31G(d) | -693.114672 | 0.142398                                              |  |  |  |
| <b>ax</b> RHF/6-31G(d) | -693.113065 | 0.142636                                              |  |  |  |

  

| energy method                               | $E$ (au)    | $G$ (au)    | rel $G$ (kcal/mol) | Population % | A-value (kcal/mol) |
|---------------------------------------------|-------------|-------------|--------------------|--------------|--------------------|
| <b>eq</b> RB3LYP-D3/6-311+G(2df,2p)         | -695.606827 | -695.464429 | 0                  | 74.1         | 0.62               |
| <b>ax</b> RB3LYP-D3/6-311+G(2df,2p)         | -695.606077 | -695.463441 | 0.620              | 25.9         |                    |
| <b>eq</b> R $\omega$ B97X-D/6-311+G(2df,2p) | -695.502351 | -695.359954 | 0                  | 78.3         | 0.76               |
| <b>ax</b> R $\omega$ B97X-D/6-311+G(2df,2p) | -695.501380 | -695.358745 | 0.759              | 21.7         |                    |
| <b>eq</b> RM06-2X/6-311+G(2df,2p)           | -695.442203 | -695.299805 | 0                  | 70.2         | 0.51               |
| <b>ax</b> RM06-2X /6-311+G(2df,2p)          | -695.441633 | -695.298997 | 0.507              | 29.8         |                    |
| <b>eq</b> RMP2(FC)/6-311+G(2df,2p)          | -694.416732 | -694.274335 | 0                  | 78.6         | 0.77               |
| <b>ax</b> RMP2(FC)/6-311+G(2df,2p)          | -694.415744 | -694.273108 | 0.770              | 21.4         |                    |

  

| geometry method      | $E$ (au)    | Thermal correction to Gibbs Free Energy (au/Particle) |  |  |  |
|----------------------|-------------|-------------------------------------------------------|--|--|--|
| <b>eq</b> RHF/6-31G* | -693.114672 | 0.142152                                              |  |  |  |
| <b>ax</b> RHF/6-31G* | -693.113065 | 0.142325                                              |  |  |  |

  

| energy method                               | $E$ (au)    | $G$ (au)    | rel $G$ (kcal/mol) | Population % | A-value (kcal/mol) |
|---------------------------------------------|-------------|-------------|--------------------|--------------|--------------------|
| <b>eq</b> R $\omega$ B97X-V/6-311+G(2df,2p) | -695.445731 | -695.303579 | 0                  | 72.0         | 0.56               |
| <b>ax</b> R $\omega$ B97X-V/6-311+G(2df,2p) | -695.445016 | -695.302691 | 0.557              | 28.0         |                    |

  

| geometry method           | $E$ (au)    | Thermal correction to Gibbs Free Energy (au/Particle) |  |  |  |
|---------------------------|-------------|-------------------------------------------------------|--|--|--|
| <b>eq</b> RB3LYP/6-31G(d) | -695.480675 | 0.131082                                              |  |  |  |
| <b>ax</b> RB3LYP/6-31G(d) | -695.479313 | 0.131277                                              |  |  |  |

  

| energy method                               | $E$ (au)    | $G$ (au)    | rel $G$ (kcal/mol) | Population % | A-value (kcal/mol) |
|---------------------------------------------|-------------|-------------|--------------------|--------------|--------------------|
| <b>eq</b> RB3LYP-D3/6-311+G(2df,2p)         | -695.606969 | -695.475888 | 0                  | 72.1         | 0.56               |
| <b>ax</b> RB3LYP-D3/6-311+G(2df,2p)         | -695.606273 | -695.474996 | 0.560              | 27.9         |                    |
| <b>eq</b> R $\omega$ B97X-D/6-311+G(2df,2p) | -695.501960 | -695.370878 | 0                  | 77.0         | 0.71               |
| <b>ax</b> R $\omega$ B97X-D/6-311+G(2df,2p) | -695.501019 | -695.369742 | 0.713              | 23.0         |                    |

|                                     |               |                                                       |                         |              |                    |
|-------------------------------------|---------------|-------------------------------------------------------|-------------------------|--------------|--------------------|
| <b>eq</b> RM06-2X/6-311+G(2df,2p)   | -695.441682   | -695.310601                                           | 0                       | 68.1         |                    |
| <b>ax</b> RM06-2X /6-311+G(2df,2p)  | -695.441166   | -695.309889                                           | 0.447                   | 31.9         | 0.45               |
| <b>eq</b> RMP2(FC)/6-311+G(2df,2p)  | -694.415921   | -694.284840                                           | 0                       | 77.3         |                    |
| <b>ax</b> RMP2(FC)/6-311+G(2df,2p)  | -694.414966   | -694.283689                                           | 0.722                   | 22.7         | 0.72               |
| geometry method                     | <i>E</i> (au) | Thermal correction to Gibbs Free Energy (au/Particle) |                         |              |                    |
| <b>eq</b> RB3LYP/6-31G*             | -695.480682   | 0.122784                                              |                         |              |                    |
| <b>ax</b> RB3LYP/6-31G*             | -695.479304   | 0.122894                                              |                         |              |                    |
| energy method                       | <i>E</i> (au) | <i>G</i> (au)                                         | rel <i>G</i> (kcal/mol) | Population % | A-value (kcal/mol) |
| <b>eq</b> RωB97X-V/6-311+G(2df,2p)  | -695.445792   | -695.323008                                           | 0                       | 69.5         |                    |
| <b>ax</b> RωB97X-V/6-311+G(2df,2p)  | -695.445127   | -695.322233                                           | 0.486                   | 30.5         | 0.49               |
| geometry method                     | <i>E</i> (au) | Thermal correction to Gibbs Free Energy (au/Particle) |                         |              |                    |
| <b>eq</b> RB3LYP-D3/6-31G(d)        | -695.496567   | 0.131615                                              |                         |              |                    |
| <b>ax</b> RB3LYP-D3/6-31G(d)        | -695.496109   | 0.131887                                              |                         |              |                    |
| energy method                       | <i>E</i> (au) | <i>G</i> (au)                                         | rel <i>G</i> (kcal/mol) | Population % | A-value (kcal/mol) |
| <b>eq</b> RB3LYP-D3/6-311+G(2df,2p) | -695.6069972  | -695.475382                                           | 0                       | 73.5         |                    |
| <b>ax</b> RB3LYP-D3/6-311+G(2df,2p) | -695.606308   | -695.474421                                           | 0.603                   | 26.5         | 0.60               |
| <b>eq</b> RωB97X-D/6-311+G(2df,2p)  | -695.502015   | -695.370400                                           | 0                       | 78.9         |                    |
| <b>ax</b> RωB97X-D/6-311+G(2df,2p)  | -695.501048   | -695.369161                                           | 0.777                   | 21.1         | 0.78               |
| <b>eq</b> RM06-2X/6-311+G(2df,2p)   | -695.441801   | -695.310186                                           | 0                       | 69.0         |                    |
| <b>ax</b> RM06-2X /6-311+G(2df,2p)  | -695.441318   | -695.309431                                           | 0.473                   | 31.0         | 0.47               |
| <b>eq</b> RMP2(FC)/6-311+G(2df,2p)  | -694.416067   | -694.284451                                           | 0                       | 77.5         |                    |
| <b>ax</b> RMP2(FC)/6-311+G(2df,2p)  | -694.415176   | -694.283289                                           | 0.729                   | 22.5         | 0.73               |
| geometry method                     | <i>E</i> (au) | Thermal correction to Gibbs Free Energy (au/Particle) |                         |              |                    |
| <b>eq</b> RB3LYP-D3/6-31G*          | -695.496567   | 0.131378                                              |                         |              |                    |
| <b>ax</b> RB3LYP-D3/6-31G*          | -695.496101   | 0.131577                                              |                         |              |                    |
| energy method                       | <i>E</i> (au) | <i>G</i> (au)                                         | rel <i>G</i> (kcal/mol) | Population % | A-value (kcal/mol) |
| <b>eq</b> RωB97X-V/6-311+G(2df,2p)  | -695.445872   | -695.314494                                           | 0                       | 71.6         |                    |
| <b>ax</b> RωB97X-V/6-311+G(2df,2p)  | -695.445207   | -695.313622                                           | 0.547                   | 28.4         | 0.55               |
| geometry method                     | <i>E</i> (au) | Thermal correction to Gibbs Free Energy (au/Particle) |                         |              |                    |

|                                      |             |          |
|--------------------------------------|-------------|----------|
| <b>eq</b> R $\omega$ B97X-D/6-31G(d) | -695.399602 | 0.133022 |
| <b>ax</b> R $\omega$ B97X-D/6-31G(d) | -695.398763 | 0.133330 |

| energy method                               | <i>E</i> (au) | <i>G</i> (au) | rel <i>G</i> (kcal/mol) | Population % | A-value (kcal/mol) |
|---------------------------------------------|---------------|---------------|-------------------------|--------------|--------------------|
| <b>eq</b> RB3LYP-D3/6-311+G(2df,2p)         | -695.607021   | -695.473999   | 0                       | 74.7         | 0.64               |
| <b>ax</b> RB3LYP-D3/6-311+G(2df,2p)         | -695.606312   | -695.472982   | 0.638                   | 25.3         |                    |
| <b>eq</b> R $\omega$ B97X-D/6-311+G(2df,2p) | -695.502459   | -695.369437   | 0                       | 79.5         | 0.80               |
| <b>ax</b> R $\omega$ B97X-D/6-311+G(2df,2p) | -695.501491   | -695.368161   | 0.8001                  | 20.5         |                    |
| <b>eq</b> RM06-2X/6-311+G(2df,2p)           | -695.442310   | -695.309288   | 0                       | 70.1         | 0.50               |
| <b>ax</b> RM06-2X /6-311+G(2df,2p)          | -695.441815   | -695.308485   | 0.504                   | 29.9         |                    |
| <b>eq</b> RMP2(FC)/6-311+G(2df,2p)          | -694.416778   | -694.283756   | 0                       | 78.1         | 0.75               |
| <b>ax</b> RMP2(FC)/6-311+G(2df,2p)          | -694.415889   | -694.282560   | 0.751                   | 21.9         |                    |

| geometry method                    | <i>E</i> (au) | Thermal correction to Gibbs Free Energy (au/Particle) |
|------------------------------------|---------------|-------------------------------------------------------|
| <b>eq</b> R $\omega$ B97X-D/6-31G* | -695.399614   | 0.122973                                              |
| <b>ax</b> R $\omega$ B97X-D/6-31G* | -695.398760   | 0.123132                                              |

| energy method                               | <i>E</i> (au) | <i>G</i> (au) | rel <i>G</i> (kcal/mol) | Population % | A-value (kcal/mol) |
|---------------------------------------------|---------------|---------------|-------------------------|--------------|--------------------|
| <b>eq</b> R $\omega$ B97X-V/6-311+G(2df,2p) | -695.446288   | -695.323315   | 0                       | 70.9         | 0.53               |
| <b>ax</b> R $\omega$ B97X-V/6-311+G(2df,2p) | -695.445607   | -695.322475   | 0.527                   | 29.1         |                    |

| geometry method            | <i>E</i> (au) | Thermal correction to Gibbs Free Energy (au/Particle) |
|----------------------------|---------------|-------------------------------------------------------|
| <b>eq</b> RM06-2X/6-31G(d) | -695.327729   | 0.132734                                              |
| <b>ax</b> RM06-2X/6-31G(d) | -695.327418   | 0.133021                                              |

| energy method                               | <i>E</i> (au) | <i>G</i> (au) | rel <i>G</i> (kcal/mol) | Population % | A-value (kcal/mol) |
|---------------------------------------------|---------------|---------------|-------------------------|--------------|--------------------|
| <b>eq</b> RB3LYP-D3/6-311+G(2df,2p)         | -695.606913   | -695.474179   | 0                       | 75.2         | 0.66               |
| <b>ax</b> RB3LYP-D3/6-311+G(2df,2p)         | -695.606154   | -695.473133   | 0.657                   | 24.8         |                    |
| <b>eq</b> R $\omega$ B97X-D/6-311+G(2df,2p) | -695.502474   | -695.369740   | 0                       | 80.4         | 0.83               |
| <b>ax</b> R $\omega$ B97X-D/6-311+G(2df,2p) | -695.501434   | -695.368413   | 0.833                   | 19.6         |                    |
| <b>eq</b> RM06-2X/6-311+G(2df,2p)           | -695.442419   | -695.309685   | 0                       | 68.7         | 0.47               |
| <b>ax</b> RM06-2X /6-311+G(2df,2p)          | -695.441964   | -695.308943   | 0.466                   | 31.3         |                    |
| <b>eq</b> RMP2(FC)/6-311+G(2df,2p)          | -694.416977   | -694.284243   | 0                       | 76.0         | 0.68               |
| <b>ax</b> RMP2(FC)/6-311+G(2df,2p)          | -694.416181   | -694.283160   | 0.680                   | 24.0         |                    |

| geometry method          | $E$ (au)    | Thermal correction to Gibbs Free Energy (au/Particle) |  |  |  |
|--------------------------|-------------|-------------------------------------------------------|--|--|--|
| <b>eq</b> RM06-2X/6-31G* | -695.327790 | 0.132592                                              |  |  |  |
| <b>ax</b> RM06-2X/6-31G* | -695.327444 | 0.132699                                              |  |  |  |

  

| energy method                               | $E$ (au)    | $G$ (au)    | rel $G$ (kcal/mol) | Population % | A-value (kcal/mol) |
|---------------------------------------------|-------------|-------------|--------------------|--------------|--------------------|
| <b>eq</b> R $\omega$ B97X-V/6-311+G(2df,2p) | -695.446340 | -695.313748 | 0                  | 70.0         | 0.50               |
| <b>ax</b> R $\omega$ B97X-V/6-311+G(2df,2p) | -695.445648 | -695.312949 | 0.501              | 30.0         |                    |

  

| geometry method                    | $E$ (au)    | Thermal correction to Gibbs Free Energy (au/Particle) |  |  |  |
|------------------------------------|-------------|-------------------------------------------------------|--|--|--|
| <b>eq</b> R $\omega$ B97X-V/6-31G* | -695.341789 | 0.132915                                              |  |  |  |
| <b>ax</b> R $\omega$ B97X-V/6-31G* | -695.341364 | 0.133139                                              |  |  |  |

  

| energy method                               | $E$ (au)    | $G$ (au)    | rel $G$ (kcal/mol) | Population % | A-value (kcal/mol) |
|---------------------------------------------|-------------|-------------|--------------------|--------------|--------------------|
| <b>eq</b> RB3LYP-D3/6-311+G(2df,2p)         | -695.607714 | -695.474796 | 0                  | 75.2         | 0.66               |
| <b>ax</b> RB3LYP-D3/6-311+G(2df,2p)         | -695.606891 | -695.473752 | 0.655              | 24.8         |                    |
| <b>eq</b> R $\omega$ B97X-D/6-311+G(2df,2p) | -695.503207 | -695.370289 | 0                  | 79.7         | 0.81               |
| <b>ax</b> R $\omega$ B97X-D/6-311+G(2df,2p) | -695.502140 | -695.369001 | 0.808              | 20.3         |                    |
| <b>eq</b> RM06-2X/6-311+G(2df,2p)           | -695.443183 | -695.310265 | 0                  | 69.2         | 0.48               |
| <b>ax</b> RM06-2X /6-311+G(2df,2p)          | -695.442644 | -695.309505 | 0.477              | 30.8         |                    |
| <b>eq</b> R $\omega$ B97X-V/6-311+G(2df,2p) | -695.446170 | -695.313252 | 0                  | 72.3         | 0.57               |
| <b>ax</b> R $\omega$ B97X-V/6-311+G(2df,2p) | -695.445490 | -695.312351 | 0.565              | 27.7         |                    |
| <b>eq</b> RMP2(FC)/6-311+G(2df,2p)          | -694.416518 | -694.283600 | 0                  | 74.9         | 0.65               |
| <b>ax</b> RMP2(FC)/6-311+G(2df,2p)          | -694.415710 | -694.282571 | 0.646              | 25.1         |                    |

  

| geometry method             | $E$ (au)    | Thermal correction to Gibbs Free Energy (au/Particle) |  |  |  |
|-----------------------------|-------------|-------------------------------------------------------|--|--|--|
| <b>eq</b> RMP2(FC)/6-31G(d) | -694.029071 | 0.134951                                              |  |  |  |
| <b>ax</b> RMP2(FC)/6-31G(d) | -694.027936 | 0.135269                                              |  |  |  |

  

| energy method                               | $E$ (au)    | $G$ (au)    | rel $G$ (kcal/mol) | Population % | A-value (kcal/mol) |
|---------------------------------------------|-------------|-------------|--------------------|--------------|--------------------|
| <b>eq</b> RB3LYP-D3/6-311+G(2df,2p)         | -695.606730 | -695.471779 | 0                  | 77.6         | 0.73               |
| <b>ax</b> RB3LYP-D3/6-311+G(2df,2p)         | -695.605878 | -965.470609 | 0.734              | 22.4         |                    |
| <b>eq</b> R $\omega$ B97X-D/6-311+G(2df,2p) | -695.502452 | -695.367500 | 0                  | 81.4         | 0.87               |
| <b>ax</b> R $\omega$ B97X-D/6-311+G(2df,2p) | -695.501378 | -695.366109 | 0.873              | 18.6         |                    |
| <b>eq</b> RM06-2X/6-311+G(2df,2p)           | -695.442396 | -695.307445 | 0                  | 70.4         | 0.51               |
| <b>ax</b> RM06-2X /6-311+G(2df,2p)          | -695.441898 | -695.306629 | 0.512              | 29.6         |                    |

|                                    |               |                                                       |                         |              |                    |
|------------------------------------|---------------|-------------------------------------------------------|-------------------------|--------------|--------------------|
| <b>eq</b> RMP2(FC)/6-311+G(2df,2p) | -694.417024   | -694.282073                                           | 0                       | 76.8         | 0.71               |
| <b>ax</b> RMP2(FC)/6-311+G(2df,2p) | -694.416216   | -694.280947                                           | 0.707                   | 23.2         |                    |
| geometry method                    | <i>E</i> (au) | Thermal correction to Gibbs Free Energy (au/Particle) |                         |              |                    |
| <b>eq</b> RMP2(FC)/6-31G*          | -694.029071   | 0.134720                                              |                         |              |                    |
| <b>ax</b> RMP2(FC)/6-31G*          | -694.027936   | 0.134981                                              |                         |              |                    |
| energy method                      | <i>E</i> (au) | <i>G</i> (au)                                         | rel <i>G</i> (kcal/mol) | Population % | A-value (kcal/mol) |
| <b>eq</b> RωB97X-V/6-311+G(2df,2p) | -695.446309   | -695.311589                                           | 0                       | 73.9         | 0.61               |
| <b>ax</b> RωB97X-V/6-311+G(2df,2p) | -695.445591   | -695.310610                                           | 0.614                   | 26.1         |                    |
| geometry method                    | <i>E</i> (au) | <i>G</i> (au)                                         | rel <i>G</i> (kcal/mol) | Population % | A-value (kcal/mol) |
| <b>eq</b> RHF/6-311+G(d,p)         | -693.198823   | -693.058635                                           | 0                       | 87.4         | 1.14               |
| <b>ax</b> RHF/6-311+G(d,p)         | -693.197198   | -693.056811                                           | 1.145                   | 12.6         |                    |
| <b>eq</b> RB3LYP/6-311+G(d,p)      | -695.575085   | -695.445687                                           | 0                       | 83.4         | 0.95               |
| <b>ax</b> RB3LYP/6-311+G(d,p)      | -695.573703   | -695.444167                                           | 0.954                   | 16.6         |                    |
| <b>eq</b> RB3LYP-D3/6-311+G(d,p)   | -695.590951   | -695.461060                                           | 0                       | 67.8         | 0.44               |
| <b>ax</b> RB3LYP-D3/6-311+G(d,p)   | -695.590461   | -695.460357                                           | 0.441                   | 32.2         |                    |
| <b>eq</b> RωB97X-D/6-311+G(d,p)    | -695.486786   | -695.355559                                           | 0                       | 74.4         | 0.63               |
| <b>ax</b> RωB97X-D/6-311+G(d,p)    | -695.486031   | -695.354553                                           | 0.631                   | 25.6         |                    |
| <b>eq</b> RM06-2X/6-311+G(d,p)     | -695.426225   | -695.294905                                           | 0                       | 64.1         | 0.34               |
| <b>ax</b> RM06-2X/6-311+G(d,p)     | -695.425951   | -695.294360                                           | 0.342                   | 35.9         |                    |
| <b>eq</b> RωB97X-V/6-311+G**       | -695.431435   | -695.300539                                           | 0                       | 66.3         | 0.40               |
| <b>ax</b> RωB97X-V/6-311+G**       | -695.430975   | -695.299904                                           | 0.398                   | 33.7         |                    |
| <b>eq</b> RMP2(FC)/6-311+G(d,p)    | -694.238102   | -694.106074                                           | 0                       | 79.8         | 0.81               |
| <b>ax</b> RMP2(FC)/6-311+G(d,p)    | -694.237123   | -694.104782                                           | 0.811                   | 20.2         |                    |



## Bromocyclohexane

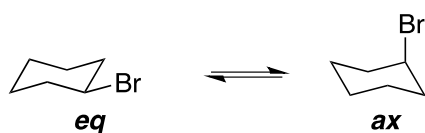

| geometry method        | $E$ (au)    | Thermal correction to Gibbs Free Energy (au/Particle) |  |  |  |
|------------------------|-------------|-------------------------------------------------------|--|--|--|
| <b>eq</b> RHF/6-31G(d) | -246.568190 | 0.140523                                              |  |  |  |
| <b>ax</b> RHF/6-31G(d) | -246.566599 | 0.140773                                              |  |  |  |

  

| energy method                       | $E$ (au)    | $G$ (au)    | rel $G$ (kcal/mol) | Population % | A-value (kcal/mol) |
|-------------------------------------|-------------|-------------|--------------------|--------------|--------------------|
| <b>eq</b> RB3LYP-D3/6-311+G(2df,2p) | -652.298445 | -652.157922 | 0                  | 71.7         | 0.55               |
| <b>ax</b> RB3LYP-D3/6-311+G(2df,2p) | -652.297822 | -652.157049 | 0.548              | 28.3         |                    |
| <b>eq</b> Rwb97X-D/6-311+G(2df,2p)  | -652.213238 | -652.072716 | 0                  | 78.6         | 0.77               |
| <b>ax</b> Rwb97X-D/6-311+G(2df,2p)  | -652.212264 | -652.071491 | 0.769              | 21.4         |                    |
| <b>eq</b> RM06-2X/6-311+G(2df,2p)   | -652.272729 | -652.132206 | 0                  | 69.7         | 0.49               |
| <b>ax</b> RM06-2X /6-311+G(2df,2p)  | -652.272195 | -652.131421 | 0.493              | 30.3         |                    |
| <b>eq</b> RMP2(FC)/6-311+G(2df,2p)  | -650.460800 | -650.320278 | 0                  | 76.5         | 0.70               |
| <b>ax</b> RMP2(FC)/6-311+G(2df,2p)  | -650.459940 | -650.319166 | 0.698              | 23.5         |                    |

  

| geometry method      | $E$ (au)     | Thermal correction to Gibbs Free Energy (au/Particle) |  |  |  |
|----------------------|--------------|-------------------------------------------------------|--|--|--|
| <b>eq</b> RHF/6-31G* | -2805.737677 | 0.140334                                              |  |  |  |
| <b>ax</b> RHF/6-31G* | -2805.735790 | 0.140491                                              |  |  |  |

  

| energy method                      | $E$ (au)     | $G$ (au)     | rel $G$ (kcal/mol) | Population % | A-value (kcal/mol) |
|------------------------------------|--------------|--------------|--------------------|--------------|--------------------|
| <b>eq</b> Rwb97X-V/6-311+G(2df,2p) | -2809.181747 | -2809.041410 | 0                  | 72.3         | 0.57               |
| <b>ax</b> Rwb97X-V/6-311+G(2df,2p) | -2809.180998 | -2809.040508 | 0.566              | 27.7         |                    |

  

| geometry method           | $E$ (au)    | Thermal correction to Gibbs Free Energy (au/Particle) |  |  |  |
|---------------------------|-------------|-------------------------------------------------------|--|--|--|
| <b>eq</b> RB3LYP/6-31G(d) | -248.450842 | 0.129329                                              |  |  |  |
| <b>ax</b> RB3LYP/6-31G(d) | -248.449423 | 0.129509                                              |  |  |  |

  

| energy method                       | $E$ (au)    | $G$ (au)    | rel $G$ (kcal/mol) | Population % | A-value (kcal/mol) |
|-------------------------------------|-------------|-------------|--------------------|--------------|--------------------|
| <b>eq</b> RB3LYP-D3/6-311+G(2df,2p) | -652.298455 | -652.169126 | 0                  | 68.6         | 0.46               |
| <b>ax</b> RB3LYP-D3/6-311+G(2df,2p) | -652.297899 | -652.168389 | 0.462              | 31.4         |                    |
| <b>eq</b> Rwb97X-D/6-311+G(2df,2p)  | -652.212644 | -652.083315 | 0                  | 76.7         | 0.70               |
| <b>ax</b> Rwb97X-D/6-311+G(2df,2p)  | -652.211705 | -652.082195 | 0.703              | 23.3         |                    |

| <b>eq</b> RM06-2X/6-311+G(2df,2p)   | -652.272108   | -652.142780                                           | 0                       | 66.5         |                    |
|-------------------------------------|---------------|-------------------------------------------------------|-------------------------|--------------|--------------------|
| <b>ax</b> RM06-2X /6-311+G(2df,2p)  | -652.271643   | -652.142134                                           | 0.405                   | 33.5         | 0.41               |
| <b>eq</b> RMP2(FC)/6-311+G(2df,2p)  | -650.459756   | -650.330427                                           | 0                       | 74.0         |                    |
| <b>ax</b> RMP2(FC)/6-311+G(2df,2p)  | -650.458953   | -650.329444                                           | 0.617                   | 26.0         | 0.62               |
| geometry method                     | <i>E</i> (au) | Thermal correction to Gibbs Free Energy (au/Particle) |                         |              |                    |
| <b>eq</b> RB3LYP/6-31G*             | -2809.166756  | 0.120960                                              |                         |              |                    |
| <b>ax</b> RB3LYP/6-31G*             | -2809.165096  | 0.121036                                              |                         |              |                    |
| energy method                       | <i>E</i> (au) | <i>G</i> (au)                                         | rel <i>G</i> (kcal/mol) | Population % | A-value (kcal/mol) |
| <b>eq</b> RωB97X-V/6-311+G(2df,2p)  | -2809.181746  | -2809.060790                                          | 0                       | 69.2         |                    |
| <b>ax</b> RωB97X-V/6-311+G(2df,2p)  | -2809.181062  | -2809.060026                                          | 0.479                   | 30.8         | 0.48               |
| geometry method                     | <i>E</i> (au) | Thermal correction to Gibbs Free Energy (au/Particle) |                         |              |                    |
| <b>eq</b> RB3LYP-D3/6-31G(d)        | -248.467442   | 0.129849                                              |                         |              |                    |
| <b>ax</b> RB3LYP-D3/6-31G(d)        | -248.467234   | 0.130189                                              |                         |              |                    |
| energy method                       | <i>E</i> (au) | <i>G</i> (au)                                         | rel <i>G</i> (kcal/mol) | Population % | A-value (kcal/mol) |
| <b>eq</b> RB3LYP-D3/6-311+G(2df,2p) | -652.298474   | -652.168626                                           | 0                       | 72.2         |                    |
| <b>ax</b> RB3LYP-D3/6-311+G(2df,2p) | -652.297917   | -652.167728                                           | 0.563                   | 27.8         | 0.56               |
| <b>eq</b> RωB97X-D/6-311+G(2df,2p)  | -652.212688   | -652.082839                                           | 0                       | 80.4         |                    |
| <b>ax</b> RωB97X-D/6-311+G(2df,2p)  | -652.211698   | -652.081509                                           | 0.835                   | 19.6         | 0.83               |
| <b>eq</b> RM06-2X/6-311+G(2df,2p)   | -652.272208   | -652.142359                                           | 0                       | 69.6         |                    |
| <b>ax</b> RM06-2X /6-311+G(2df,2p)  | -652.271768   | -652.141579                                           | 0.490                   | 30.4         | 0.49               |
| <b>eq</b> RMP2(FC)/6-311+G(2df,2p)  | -650.459905   | -650.330056                                           | 0                       | 76.1         |                    |
| <b>ax</b> RMP2(FC)/6-311+G(2df,2p)  | -650.459153   | -650.328964                                           | 0.686                   | 23.9         | 0.69               |
| geometry method                     | <i>E</i> (au) | Thermal correction to Gibbs Free Energy (au/Particle) |                         |              |                    |
| <b>eq</b> RB3LYP-D3/6-31G*          | -2809.183353  | 0.129570                                              |                         |              |                    |
| <b>ax</b> RB3LYP-D3/6-31G*          | -2809.182883  | 0.129781                                              |                         |              |                    |
| energy method                       | <i>E</i> (au) | <i>G</i> (au)                                         | rel <i>G</i> (kcal/mol) | Population % | A-value (kcal/mol) |
| <b>eq</b> RωB97X-V/6-311+G(2df,2p)  | -2809.181820  | -2809.052247                                          | 0                       | 71.9         |                    |
| <b>ax</b> RωB97X-V/6-311+G(2df,2p)  | -2809.181146  | -2809.051363                                          | 0.555                   | 28.1         | 0.55               |
| geometry method                     | <i>E</i> (au) | Thermal correction to Gibbs Free Energy (au/Particle) |                         |              |                    |

**eq** R $\omega$ B97X-D/6-31G(d) -248.394062 0.131220

**ax** R $\omega$ B97X-D/6-31G(d) -248.393447 0.131452

| energy method                               | <i>E</i> (au) | <i>G</i> (au) | rel <i>G</i><br>(kcal/mol) | Population<br>% | A-value<br>(kcal/mol) |
|---------------------------------------------|---------------|---------------|----------------------------|-----------------|-----------------------|
| <b>eq</b> RB3LYP-D3/6-311+G(2df,2p)         | -652.298547   | -652.167326   | 0                          | 70.3            | 0.51                  |
| <b>ax</b> RB3LYP-D3/6-311+G(2df,2p)         | -652.297970   | -652.166517   | 0.508                      | 29.7            |                       |
| <b>eq</b> R $\omega$ B97X-D/6-311+G(2df,2p) | -652.213359   | -652.082139   | 0                          | 78.5            | 0.77                  |
| <b>ax</b> R $\omega$ B97X-D/6-311+G(2df,2p) | -652.212372   | -652.080919   | 0.765                      | 21.5            |                       |
| <b>eq</b> RM06-2X/6-311+G(2df,2p)           | -652.272858   | -652.141638   | 0                          | 67.4            | 0.43                  |
| <b>ax</b> RM06-2X /6-311+G(2df,2p)          | -652.272408   | -652.140956   | 0.428                      | 32.6            |                       |
| <b>eq</b> RMP2(FC)/6-311+G(2df,2p)          | -650.460948   | -650.329728   | 0                          | 73.4            | 0.60                  |
| <b>ax</b> RMP2(FC)/6-311+G(2df,2p)          | -650.460226   | -650.328773   | 0.599                      | 26.6            |                       |

| geometry method                    | <i>E</i> (au) | Thermal correction to Gibbs Free Energy (au/Particle) |          |  |  |
|------------------------------------|---------------|-------------------------------------------------------|----------|--|--|
| <b>eq</b> R $\omega$ B97X-D/6-31G* | -2809.135404  |                                                       | 0.121202 |  |  |
| <b>ax</b> R $\omega$ B97X-D/6-31G* | -2809.134411  |                                                       | 0.121337 |  |  |

| energy method                               | <i>E</i> (au) | <i>G</i> (au) | rel <i>G</i><br>(kcal/mol) | Population<br>% | A-value<br>(kcal/mol) |
|---------------------------------------------|---------------|---------------|----------------------------|-----------------|-----------------------|
| <b>eq</b> R $\omega$ B97X-V/6-311+G(2df,2p) | -2809.182351  | -2809.061147  | 0                          | 70.7            | 0.52                  |
| <b>ax</b> R $\omega$ B97X-V/6-311+G(2df,2p) | -2809.181658  | -2809.060317  | 0.521                      | 29.3            |                       |

| geometry method            | <i>E</i> (au) | Thermal correction to Gibbs Free Energy (au/Particle) |          |  |  |
|----------------------------|---------------|-------------------------------------------------------|----------|--|--|
| <b>eq</b> RM06-2X/6-31G(d) | -248.284094   |                                                       | 0.130969 |  |  |
| <b>ax</b> RM06-2X/6-31G(d) | -248.284078   |                                                       | 0.131297 |  |  |

| energy method                               | <i>E</i> (au) | <i>G</i> (au) | rel <i>G</i><br>(kcal/mol) | Population<br>% | A-value<br>(kcal/mol) |
|---------------------------------------------|---------------|---------------|----------------------------|-----------------|-----------------------|
| <b>eq</b> RB3LYP-D3/6-311+G(2df,2p)         | -652.298501   | -652.167531   | 0                          | 73.9            | 0.61                  |
| <b>ax</b> RB3LYP-D3/6-311+G(2df,2p)         | -652.297850   | -652.166553   | 0.614                      | 26.1            |                       |
| <b>eq</b> R $\omega$ B97X-D/6-311+G(2df,2p) | -652.2134149  | -652.082445   | 0                          | 81.3            | 0.87                  |
| <b>ax</b> R $\omega$ B97X-D/6-311+G(2df,2p) | -652.212362   | -652.081065   | 0.866                      | 18.7            |                       |
| <b>eq</b> RM06-2X/6-311+G(2df,2p)           | -652.272989   | -652.142019   | 0                          | 68.7            | 0.46                  |
| <b>ax</b> RM06-2X /6-311+G(2df,2p)          | -652.272578   | -652.141281   | 0.463                      | 31.3            |                       |
| <b>eq</b> RMP2(FC)/6-311+G(2df,2p)          | -650.461194   | -650.330224   | 0                          | 72.5            | 0.57                  |
| <b>ax</b> RMP2(FC)/6-311+G(2df,2p)          | -650.460607   | -650.329310   | 0.574                      | 27.5            |                       |

| geometry method | <i>E</i> (au) | Thermal correction to Gibbs Free Energy (au/Particle) |  |  |  |
|-----------------|---------------|-------------------------------------------------------|--|--|--|
|-----------------|---------------|-------------------------------------------------------|--|--|--|

**eq** RM06-2X/6-31G\* -2809.050141 0.130813

**ax** RM06-2X/6-31G\* -2809.049728 0.130875

| energy method                               | $E$ (au)     | $G$ (au)     | rel $G$ (kcal/mol) | Population % | A-value (kcal/mol) |
|---------------------------------------------|--------------|--------------|--------------------|--------------|--------------------|
| <b>eq</b> R $\omega$ B97X-V/6-311+G(2df,2p) | -2809.182405 | -2809.051594 | 0                  | 69.0         | 0.47               |
| <b>ax</b> R $\omega$ B97X-V/6-311+G(2df,2p) | -2809.181718 | -2809.050840 | 0.473              | 31.0         |                    |

| geometry method                    | $E$ (au)     | Thermal correction to Gibbs Free Energy (au/Particle) |  |  |  |
|------------------------------------|--------------|-------------------------------------------------------|--|--|--|
| <b>eq</b> R $\omega$ B97X-V/6-31G* | -2808.848559 | 0.131148                                              |  |  |  |
| <b>ax</b> R $\omega$ B97X-V/6-31G* | -2808.847975 | 0.131363                                              |  |  |  |

| energy method                               | $E$ (au)     | $G$ (au)     | rel $G$ (kcal/mol) | Population % | A-value (kcal/mol) |
|---------------------------------------------|--------------|--------------|--------------------|--------------|--------------------|
| <b>eq</b> RB3LYP-D3/6-311+G(2df,2p)         | -652.297987  | -652.166838  | 0                  | 70.5         | 0.52               |
| <b>ax</b> RB3LYP-D3/6-311+G(2df,2p)         | -652.297382  | -652.166017  | 0.515              | 29.5         |                    |
| <b>eq</b> R $\omega$ B97X-D/6-311+G(2df,2p) | -652.213002  | -652.081853  | 0                  | 77.7         | 0.74               |
| <b>ax</b> R $\omega$ B97X-D/6-311+G(2df,2p) | -652.212044  | -652.080679  | 0.737              | 22.3         |                    |
| <b>eq</b> RM06-2X/6-311+G(2df,2p)           | -652.272555  | -652.141406  | 0                  | 66.4         | 0.40               |
| <b>ax</b> RM06-2X /6-311+G(2df,2p)          | -652.272130  | -652.140765  | 0.402              | 33.6         |                    |
| <b>eq</b> R $\omega$ B97X-V/6-311+G(2df,2p) | -2809.182218 | -2809.051069 | 0                  | 72.2         | 0.56               |
| <b>ax</b> R $\omega$ B97X-V/6-311+G(2df,2p) | -2809.181534 | -2809.050169 | 0.565              | 27.8         |                    |
| <b>eq</b> RMP2(FC)/6-311+G(2df,2p)          | -650.460955  | -650.329806  | 0                  | 70.4         | 0.51               |
| <b>ax</b> RMP2(FC)/6-311+G(2df,2p)          | -650.460355  | -650.328990  | 0.512              | 29.6         |                    |

| geometry method             | $E$ (au)    | Thermal correction to Gibbs Free Energy (au/Particle) |  |  |  |
|-----------------------------|-------------|-------------------------------------------------------|--|--|--|
| <b>eq</b> RMP2(FC)/6-31G(d) | -247.463042 | 0.133097                                              |  |  |  |
| <b>ax</b> RMP2(FC)/6-31G(d) | -247.461905 | 0.133430                                              |  |  |  |

| energy method                               | $E$ (au)    | $G$ (au)    | rel $G$ (kcal/mol) | Population % | A-value (kcal/mol) |
|---------------------------------------------|-------------|-------------|--------------------|--------------|--------------------|
| <b>eq</b> RB3LYP-D3/6-311+G(2df,2p)         | -652.298348 | -652.165250 | 0                  | 75.6         | 0.67               |
| <b>ax</b> RB3LYP-D3/6-311+G(2df,2p)         | -652.297615 | -652.164185 | 0.668              | 24.4         |                    |
| <b>eq</b> R $\omega$ B97X-D/6-311+G(2df,2p) | -652.213447 | -652.080349 | 0                  | 81.7         | 0.88               |
| <b>ax</b> R $\omega$ B97X-D/6-311+G(2df,2p) | -652.212371 | -652.078941 | 0.883              | 18.3         |                    |
| <b>eq</b> RM06-2X/6-311+G(2df,2p)           | -652.272980 | -652.139882 | 0                  | 69.5         | 0.49               |
| <b>ax</b> RM06-2X /6-311+G(2df,2p)          | -652.272538 | -652.139108 | 0.485              | 30.5         |                    |
| <b>eq</b> RMP2(FC)/6-311+G(2df,2p)          | -650.461305 | -650.328208 | 0                  | 72.1         | 0.56               |

|                                    |               |                                                       |                         |              |                    |
|------------------------------------|---------------|-------------------------------------------------------|-------------------------|--------------|--------------------|
| <b>ax</b> RMP2(FC)/6-311+G(2df,2p) | -650.460745   | -650.327315                                           | 0.560                   | 27.9         |                    |
| geometry method                    | <i>E</i> (au) | Thermal correction to Gibbs Free Energy (au/Particle) |                         |              |                    |
| <b>eq</b> RMP2(FC)/6-31G*          | -2806.639420  |                                                       | 0.132763                |              |                    |
| <b>ax</b> RMP2(FC)/6-31G*          | -2806.638331  |                                                       | 0.133056                |              |                    |
| energy method                      | <i>E</i> (au) | <i>G</i> (au)                                         | rel <i>G</i> (kcal/mol) | Population % | A-value (kcal/mol) |
| <b>eq</b> RωB97X-V/6-311+G(2df,2p) | -2809.182381  | -2809.049621                                          | 0                       | 73.9         | 0.61               |
| <b>ax</b> RωB97X-V/6-311+G(2df,2p) | -2809.181693  | -2809.048642                                          | 0.614                   | 26.1         |                    |
| geometry method                    | <i>E</i> (au) | <i>G</i> (au)                                         | rel <i>G</i> (kcal/mol) | Population % | A-value (kcal/mol) |
| <b>eq</b> RHF/6-311+G(d,p)         | -649.197351   | -649.058972                                           | 0                       | 89.3         | 1.25               |
| <b>ax</b> RHF/6-311+G(d,p)         | -649.195536   | -649.056977                                           | 1.252                   | 10.7         |                    |
| <b>eq</b> RB3LYP/6-311+G(d,p)      | -652.269001   | -652.141425                                           | 0                       | 86.1         | 1.08               |
| <b>ax</b> RB3LYP/6-311+G(d,p)      | -652.267397   | -652.139707                                           | 1.078                   | 13.9         |                    |
| <b>eq</b> RB3LYP-D3/6-311+G(d,p)   | -652.285581   | -652.157485                                           | 0                       | 67.3         | 0.43               |
| <b>ax</b> RB3LYP-D3/6-311+G(d,p)   | -652.285166   | -652.156806                                           | 0.426                   | 32.7         |                    |
| <b>eq</b> RωB97X-D/6-311+G(d,p)    | -652.201169   | -652.200381                                           | 0                       | 74.5         | 0.63               |
| <b>ax</b> RωB97X-D/6-311+G(d,p)    | -652.071738   | -652.070727                                           | 0.634                   | 25.5         |                    |
| <b>eq</b> RM06-2X/6-311+G(d,p)     | -652.260120   | -652.130637                                           | 0                       | 64.2         | 0.35               |
| <b>ax</b> RM06-2X/6-311+G(d,p)     | -652.259920   | -652.130087                                           | 0.345                   | 35.8         |                    |
| <b>eq</b> RωB97X-V/6-311+G**       | -2809.170054  | -2809.040932                                          | 0                       | 68.6         | 0.46               |
| <b>ax</b> RωB97X-V/6-311+G**       | -2809.169503  | -2809.040195                                          | 0.462                   | 31.4         |                    |
| <b>eq</b> RMP2(FC)/6-311+G(d,p)    | -650.331851   | -650.201964                                           | 0                       | 61.4         | 0.27               |
| <b>ax</b> RMP2(FC)/6-311+G(d,p)    | -650.331786   | -650.201528                                           | 0.274                   | 38.6         |                    |

## Iodocyclohexane

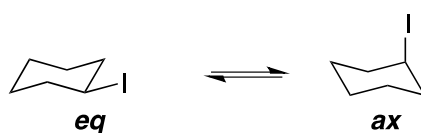

| geometry method        | $E$ (au)    | Thermal correction to Gibbs Free Energy (au/Particle) |  |  |  |
|------------------------|-------------|-------------------------------------------------------|--|--|--|
| <b>eq</b> RHF/6-31G(d) | -244.789103 | 0.139255                                              |  |  |  |
| <b>ax</b> RHF/6-31G(d) | -244.786960 | 0.139476                                              |  |  |  |

  

| energy method                       | $E$ (au)    | $G$ (au)    | rel $G$ (kcal/mol) | Population % | A-value (kcal/mol) |
|-------------------------------------|-------------|-------------|--------------------|--------------|--------------------|
| <b>eq</b> RB3LYP-D3/6-311+G(2df,2p) | -533.178194 | -533.038939 | 0                  | 70.4         | 0.51               |
| <b>ax</b> RB3LYP-D3/6-311+G(2df,2p) | -533.177600 | -533.038123 | 0.512              | 29.6         |                    |
| <b>eq</b> Rwb97X-D/6-311+G(2df,2p)  | -533.073099 | -532.933844 | 0                  | 78.0         | 0.75               |
| <b>ax</b> Rwb97X-D/6-311+G(2df,2p)  | -533.072129 | -532.932652 | 0.748              | 22.0         |                    |
| <b>eq</b> RM06-2X/6-311+G(2df,2p)   | -532.869381 | -532.730126 | 0                  | 69.9         | 0.50               |
| <b>ax</b> RM06-2X /6-311+G(2df,2p)  | -532.868811 | -532.729334 | 0.497              | 30.1         |                    |
| <b>eq</b> RMP2(FC)/6-311+G(2df,2p)  | -531.745099 | -531.605844 | 0                  | 79.2         | 0.79               |
| <b>ax</b> RMP2(FC)/6-311+G(2df,2p)  | -531.744062 | -531.604586 | 0.790              | 20.8         |                    |

  

| geometry method      | $E$ (au)    | Thermal correction to Gibbs Free Energy (au/Particle) |  |  |  |
|----------------------|-------------|-------------------------------------------------------|--|--|--|
| <b>eq</b> RHF/6-31G* | -244.790347 | 0.138923                                              |  |  |  |
| <b>ax</b> RHF/6-31G* | -244.788238 | 0.139113                                              |  |  |  |

  

| energy method                      | $E$ (au)     | $G$ (au)     | rel $G$ (kcal/mol) | Population % | A-value (kcal/mol) |
|------------------------------------|--------------|--------------|--------------------|--------------|--------------------|
| <b>eq</b> Rwb97X-V/6-311+G(2df,2p) | -7154.396256 | -7154.257333 | 0                  | 71.2         | 0.54               |
| <b>ax</b> Rwb97X-V/6-311+G(2df,2p) | -7154.395592 | -7154.256479 | 0.536              | 28.8         |                    |

  

| geometry method           | $E$ (au)    | Thermal correction to Gibbs Free Energy (au/Particle) |  |  |  |
|---------------------------|-------------|-------------------------------------------------------|--|--|--|
| <b>eq</b> RB3LYP/6-31G(d) | -246.665175 | 0.128098                                              |  |  |  |
| <b>ax</b> RB3LYP/6-31G(d) | -246.663405 | 0.128252                                              |  |  |  |

  

| energy method                       | $E$ (au)    | $G$ (au)    | rel $G$ (kcal/mol) | Population % | A-value (kcal/mol) |
|-------------------------------------|-------------|-------------|--------------------|--------------|--------------------|
| <b>eq</b> RB3LYP-D3/6-311+G(2df,2p) | -533.178233 | -533.050134 | 0                  | 67.1         | 0.42               |
| <b>ax</b> RB3LYP-D3/6-311+G(2df,2p) | -533.177713 | -533.049462 | 0.422              | 32.9         |                    |
| <b>eq</b> Rwb97X-D/6-311+G(2df,2p)  | -533.072554 | -532.944455 | 0                  | 75.8         | 0.67               |
| <b>ax</b> Rwb97X-D/6-311+G(2df,2p)  | -533.071634 | -532.943383 | 0.673              | 24.2         |                    |

|                                     |               |                                                       |                         |              |                    |
|-------------------------------------|---------------|-------------------------------------------------------|-------------------------|--------------|--------------------|
| <b>eq</b> RM06-2X/6-311+G(2df,2p)   | -532.868797   | -532.740699                                           | 0                       | 65.7         |                    |
| <b>ax</b> RM06-2X /6-311+G(2df,2p)  | -532.868340   | -532.740089                                           | 0.383                   | 34.3         | 0.38               |
| <b>eq</b> RMP2(FC)/6-311+G(2df,2p)  | -531.876838   | -531.748739                                           | 0                       | 79.0         |                    |
| <b>ax</b> RMP2(FC)/6-311+G(2df,2p)  | -531.875746   | -531.747495                                           | 0.781                   | 21.0         | 0.78               |
| geometry method                     | <i>E</i> (au) | Thermal correction to Gibbs Free Energy (au/Particle) |                         |              |                    |
| <b>eq</b> RB3LYP/6-31G*             | -246.669360   | 0.119607                                              |                         |              |                    |
| <b>ax</b> RB3LYP/6-31G*             | -246.667591   | 0.119699                                              |                         |              |                    |
| energy method                       | <i>E</i> (au) | <i>G</i> (au)                                         | rel <i>G</i> (kcal/mol) | Population % | A-value (kcal/mol) |
| <b>eq</b> RwB97X-V/6-311+G(2df,2p)  | -7154.396312  | -7154.276705                                          | 0                       | 67.3         |                    |
| <b>ax</b> RwB97X-V/6-311+G(2df,2p)  | -7154.395726  | -7154.276027                                          | 0.425                   | 32.7         | 0.43               |
| geometry method                     | <i>E</i> (au) | Thermal correction to Gibbs Free Energy (au/Particle) |                         |              |                    |
| <b>eq</b> RB3LYP-D3/6-31G(d)        | -246.682226   | 0.128671                                              |                         |              |                    |
| <b>ax</b> RB3LYP-D3/6-31G(d)        | -246.681821   | 0.128939                                              |                         |              |                    |
| energy method                       | <i>E</i> (au) | <i>G</i> (au)                                         | rel <i>G</i> (kcal/mol) | Population % | A-value (kcal/mol) |
| <b>eq</b> RB3LYP-D3/6-311+G(2df,2p) | -533.178252   | -533.049581                                           | 0                       | 69.7         |                    |
| <b>ax</b> RB3LYP-D3/6-311+G(2df,2p) | -533.177737   | -533.048798                                           | 0.491                   | 30.3         | 0.49               |
| <b>eq</b> RwB97X-D/6-311+G(2df,2p)  | -533.072592   | -532.943921                                           | 0                       | 78.7         |                    |
| <b>ax</b> RwB97X-D/6-311+G(2df,2p)  | -533.071627   | -532.942688                                           | 0.774                   | 21.3         | 0.77               |
| <b>eq</b> RM06-2X/6-311+G(2df,2p)   | -532.868889   | -532.740218                                           | 0                       | 67.2         |                    |
| <b>ax</b> RM06-2X /6-311+G(2df,2p)  | -532.868480   | -532.739541                                           | 0.425                   | 32.8         | 0.42               |
| <b>eq</b> RMP2(FC)/6-311+G(2df,2p)  | -531.876952   | -531.748280                                           | 0                       | 80.3         |                    |
| <b>ax</b> RMP2(FC)/6-311+G(2df,2p)  | -531.875899   | -531.746960                                           | 0.828                   | 19.7         | 0.83               |
| geometry method                     | <i>E</i> (au) | Thermal correction to Gibbs Free Energy (au/Particle) |                         |              |                    |
| <b>eq</b> RB3LYP-D3/6-31G*          | -246.686403   | 0.128214                                              |                         |              |                    |
| <b>ax</b> RB3LYP-D3/6-31G*          | -246.685999   | 0.128440                                              |                         |              |                    |
| energy method                       | <i>E</i> (au) | <i>G</i> (au)                                         | rel <i>G</i> (kcal/mol) | Population % | A-value (kcal/mol) |
| <b>eq</b> RwB97X-V/6-311+G(2df,2p)  | -7154.396374  | -7154.268160                                          | 0                       | 70.2         |                    |
| <b>ax</b> RwB97X-V/6-311+G(2df,2p)  | -7154.395792  | -7154.267352                                          | 0.507                   | 29.8         | 0.51               |
| geometry method                     | <i>E</i> (au) | Thermal correction to Gibbs Free Energy (au/Particle) |                         |              |                    |

**eq** RωB97X-D/6-31G(d) -246.608488 0.130037

**ax** RωB97X-D/6-31G(d) -246.607685 0.130267

| energy method                       | E (au)      | G (au)      | rel G (kcal/mol) | Population % | A-value (kcal/mol) |
|-------------------------------------|-------------|-------------|------------------|--------------|--------------------|
| <b>eq</b> RB3LYP-D3/6-311+G(2df,2p) | -533.178280 | -533.048244 | 0                | 69.6         | 0.49               |
| <b>ax</b> RB3LYP-D3/6-311+G(2df,2p) | -533.177731 | -533.047464 | 0.490            | 30.4         |                    |
| <b>eq</b> RωB97X-D/6-311+G(2df,2p)  | -533.073282 | -532.943245 | 0                | 77.8         | 0.74               |
| <b>ax</b> RωB97X-D/6-311+G(2df,2p)  | -533.072332 | -532.942065 | 0.741            | 22.2         |                    |
| <b>eq</b> RM06-2X/6-311+G(2df,2p)   | -532.869567 | -532.739531 | 0                | 66.6         | 0.41               |
| <b>ax</b> RM06-2X /6-311+G(2df,2p)  | -532.869147 | -532.738880 | 0.409            | 33.4         |                    |
| <b>eq</b> RMP2(FC)/6-311+G(2df,2p)  | -531.878086 | -531.748049 | 0                | 78.2         | 0.75               |
| <b>ax</b> RMP2(FC)/6-311+G(2df,2p)  | -531.877114 | -531.746847 | 0.754            | 21.8         |                    |

| geometry method           | E (au)      | Thermal correction to Gibbs Free Energy (au/Particle) |  |
|---------------------------|-------------|-------------------------------------------------------|--|
| <b>eq</b> RωB97X-D/6-31G* | -246.611787 | 0.119910                                              |  |
| <b>ax</b> RωB97X-D/6-31G* | -246.610977 | 0.120027                                              |  |

| energy method                      | E (au)       | G (au)       | rel G (kcal/mol) | Population % | A-value (kcal/mol) |
|------------------------------------|--------------|--------------|------------------|--------------|--------------------|
| <b>eq</b> RωB97X-V/6-311+G(2df,2p) | -7154.396903 | -7154.276993 | 0                | 67.8         | 0.44               |
| <b>ax</b> RωB97X-V/6-311+G(2df,2p) | -7154.396317 | -7154.276290 | 0.441            | 32.2         |                    |

| geometry method            | E (au)      | Thermal correction to Gibbs Free Energy (au/Particle) |  |
|----------------------------|-------------|-------------------------------------------------------|--|
| <b>eq</b> RM06-2X/6-31G(d) | -246.497503 | 0.129710                                              |  |
| <b>ax</b> RM06-2X/6-31G(d) | -246.497147 | 0.130005                                              |  |

| energy method                       | E (au)      | G (au)      | rel G (kcal/mol) | Population % | A-value (kcal/mol) |
|-------------------------------------|-------------|-------------|------------------|--------------|--------------------|
| <b>eq</b> RB3LYP-D3/6-311+G(2df,2p) | -533.178174 | -533.048464 | 0                | 72.7         | 0.58               |
| <b>ax</b> RB3LYP-D3/6-311+G(2df,2p) | -533.177547 | -533.047542 | 0.579            | 27.3         |                    |
| <b>eq</b> RωB97X-D/6-311+G(2df,2p)  | -533.073349 | -532.943639 | 0                | 80.1         | 0.82               |
| <b>ax</b> RωB97X-D/6-311+G(2df,2p)  | -533.072334 | -532.942329 | 0.822            | 19.9         |                    |
| <b>eq</b> RM06-2X/6-311+G(2df,2p)   | -532.869712 | -532.740002 | 0                | 66.5         | 0.40               |
| <b>ax</b> RM06-2X /6-311+G(2df,2p)  | -532.869362 | -532.739357 | 0.405            | 33.5         |                    |
| <b>eq</b> RMP2(FC)/6-311+G(2df,2p)  | -531.878391 | -531.748681 | 0                | 76.2         | 0.69               |
| <b>ax</b> RMP2(FC)/6-311+G(2df,2p)  | -531.877592 | -531.747587 | 0.686            | 23.8         |                    |



| geometry method          | $E$ (au)    | Thermal correction to Gibbs Free Energy (au/Particle) |  |  |  |
|--------------------------|-------------|-------------------------------------------------------|--|--|--|
| <b>eq</b> RM06-2X/6-31G* | -246.500112 | 0.129406                                              |  |  |  |
| <b>ax</b> RM06-2X/6-31G* | -246.499729 | 0.129538                                              |  |  |  |

  

| energy method                               | $E$ (au)     | $G$ (au)     | rel $G$ (kcal/mol) | Population % | A-value (kcal/mol) |
|---------------------------------------------|--------------|--------------|--------------------|--------------|--------------------|
| <b>eq</b> R $\omega$ B97X-V/6-311+G(2df,2p) | -7154.396952 | -7154.267546 | 0                  | 67.8         | 0.44               |
| <b>ax</b> R $\omega$ B97X-V/6-311+G(2df,2p) | -7154.396384 | -7154.266846 | 0.439              | 32.2         |                    |

  

| geometry method                    | $E$ (au)    | Thermal correction to Gibbs Free Energy (au/Particle) |  |  |  |
|------------------------------------|-------------|-------------------------------------------------------|--|--|--|
| <b>eq</b> R $\omega$ B97X-V/6-31G* | -246.601810 | 0.129812                                              |  |  |  |
| <b>ax</b> R $\omega$ B97X-V/6-31G* | -246.601231 | 0.130035                                              |  |  |  |

  

| energy method                               | $E$ (au)     | $G$ (au)     | rel $G$ (kcal/mol) | Population % | A-value (kcal/mol) |
|---------------------------------------------|--------------|--------------|--------------------|--------------|--------------------|
| <b>eq</b> RB3LYP-D3/6-311+G(2df,2p)         | -7154.906266 | -7154.776454 | 0                  | 71.4         | 0.54               |
| <b>ax</b> RB3LYP-D3/6-311+G(2df,2p)         | -7154.905627 | -7154.775592 | 0.541              | 28.6         |                    |
| <b>eq</b> R $\omega$ B97X-D/6-311+G(2df,2p) | -7154.967255 | -7154.837443 | 0                  | 78.6         | 0.77               |
| <b>ax</b> R $\omega$ B97X-D/6-311+G(2df,2p) | -7154.966255 | -7154.836220 | 0.767              | 21.4         |                    |
| <b>eq</b> RM06-2X/6-311+G(2df,2p)           | -7155.158474 | -7155.028662 | 0                  | 65.0         | 0.37               |
| <b>ax</b> RM06-2X /6-311+G(2df,2p)          | -7155.158115 | -7155.028080 | 0.365              | 35.0         |                    |
| <b>eq</b> R $\omega$ B97X-V/6-311+G(2df,2p) | -7154.396780 | -7154.266968 | 0                  | 70.0         | 0.50               |
| <b>ax</b> R $\omega$ B97X-V/6-311+G(2df,2p) | -7154.396250 | -7154.266170 | 0.501              | 30.0         |                    |
| <b>eq</b> RMP2(FC)/6-311+G(2df,2p)          | -531.878019  | -531.748207  | 0                  | 75.2         | 0.65               |
| <b>ax</b> RMP2(FC)/6-311+G(2df,2p)          | -531.877198  | -531.747163  | 0.655              | 24.8         |                    |

  

| geometry method             | $E$ (au)    | Thermal correction to Gibbs Free Energy (au/Particle) |  |  |  |
|-----------------------------|-------------|-------------------------------------------------------|--|--|--|
| <b>eq</b> RMP2(FC)/6-31G(d) | -245.671411 | 0.131769                                              |  |  |  |
| <b>ax</b> RMP2(FC)/6-31G(d) | -245.669958 | 0.132088                                              |  |  |  |

  

| energy method                               | $E$ (au)    | $G$ (au)    | rel $G$ (kcal/mol) | Population % | A-value (kcal/mol) |
|---------------------------------------------|-------------|-------------|--------------------|--------------|--------------------|
| <b>eq</b> RB3LYP-D3/6-311+G(2df,2p)         | -533.178175 | -533.046406 | 0                  | 74.4         | 0.63               |
| <b>ax</b> RB3LYP-D3/6-311+G(2df,2p)         | -533.177492 | -533.045404 | 0.629              | 25.6         |                    |
| <b>eq</b> R $\omega$ B97X-D/6-311+G(2df,2p) | -533.073326 | -532.941557 | 0                  | 80.3         | 0.83               |
| <b>ax</b> R $\omega$ B97X-D/6-311+G(2df,2p) | -533.072324 | -532.940237 | 0.828              | 19.7         |                    |
| <b>eq</b> RM06-2X/6-311+G(2df,2p)           | -532.869662 | -532.737893 | 0                  | 67.4         | 0.43               |
| <b>ax</b> RM06-2X /6-311+G(2df,2p)          | -532.869299 | -532.737211 | 0.428              | 32.6         |                    |

|                                    |               |                                                       |                         |              |                    |
|------------------------------------|---------------|-------------------------------------------------------|-------------------------|--------------|--------------------|
| <b>eq</b> RMP2(FC)/6-311+G(2df,2p) | -531.746220   | -531.614450                                           | 0                       | 73.8         | 0.61               |
| <b>ax</b> RMP2(FC)/6-311+G(2df,2p) | -531.745564   | -531.613477                                           | 0.611                   | 26.2         |                    |
| geometry method                    | <i>E</i> (au) | Thermal correction to Gibbs Free Energy (au/Particle) |                         |              |                    |
| <b>eq</b> RMP2(FC)/6-31G*          | -245.683776   | 0.131355                                              |                         |              |                    |
| <b>ax</b> RMP2(FC)/6-31G*          | -245.682506   | 0.131682                                              |                         |              |                    |
| energy method                      | <i>E</i> (au) | <i>G</i> (au)                                         | rel <i>G</i> (kcal/mol) | Population % | A-value (kcal/mol) |
| <b>eq</b> RωB97X-V/6-311+G(2df,2p) | -7154.396922  | -7154.265567                                          | 0                       | 72.1         | 0.56               |
| <b>ax</b> RωB97X-V/6-311+G(2df,2p) | -7154.396357  | -7154.264675                                          | 0.560                   | 27.9         |                    |
| geometry method                    | <i>E</i> (au) | <i>G</i> (au)                                         | rel <i>G</i> (kcal/mol) | Population % | A-value (kcal/mol) |
| <b>eq</b> RHF/6-311+G(d,p)         | -530.344502   | -530.207910                                           | 0                       | 92.6         | 1.50               |
| <b>ax</b> RHF/6-311+G(d,p)         | -530.342793   | -530.205527                                           | 1.495                   | 7.4          |                    |
| <b>eq</b> RB3LYP/6-311+G(d,p)      | -533.148193   | -533.021857                                           | 0                       | 88.2         | 1.19               |
| <b>ax</b> RB3LYP/6-311+G(d,p)      | -533.146387   | -533.019966                                           | 1.87                    | 11.8         |                    |
| <b>eq</b> RB3LYP-D3/6-311+G(d,p)   | -533.165219   | -533.038450                                           | 0                       | 69.7         | 0.49               |
| <b>ax</b> RB3LYP-D3/6-311+G(d,p)   | -533.164770   | -533.037667                                           | 0.491                   | 30.3         |                    |
| <b>eq</b> RωB97X-D/6-311+G(d,p)    | -533.060892   | -532.932677                                           | 0                       | 75.9         | 0.68               |
| <b>ax</b> RωB97X-D/6-311+G(d,p)    | -533.060059   | -532.931596                                           | 0.678                   | 24.1         |                    |
| <b>eq</b> RM06-2X/6-311+G(d,p)     | -532.856712   | -532.728456                                           | 0                       | 63.9         | 0.34               |
| <b>ax</b> RM06-2X/6-311+G(d,p)     | -532.856491   | -532.727919                                           | 0.337                   | 36.1         |                    |
| <b>eq</b> RωB97X-V/6-311+G**       | -7154.384267  | -7154.256469                                          | 0                       | 66.3         | 0.40               |
| <b>ax</b> RωB97X-V/6-311+G**       | -7154.383876  | -7154.255832                                          | 0.400                   | 33.7         |                    |
| <b>eq</b> RMP2(FC)/6-311+G(d,p)    | -531.746423   | -531.617804                                           | 0                       | 73.7         | 0.61               |
| <b>ax</b> RMP2(FC)/6-311+G(d,p)    | -531.745794   | -531.616832                                           | 0.610                   | 26.3         |                    |

## Ethylcyclohexane

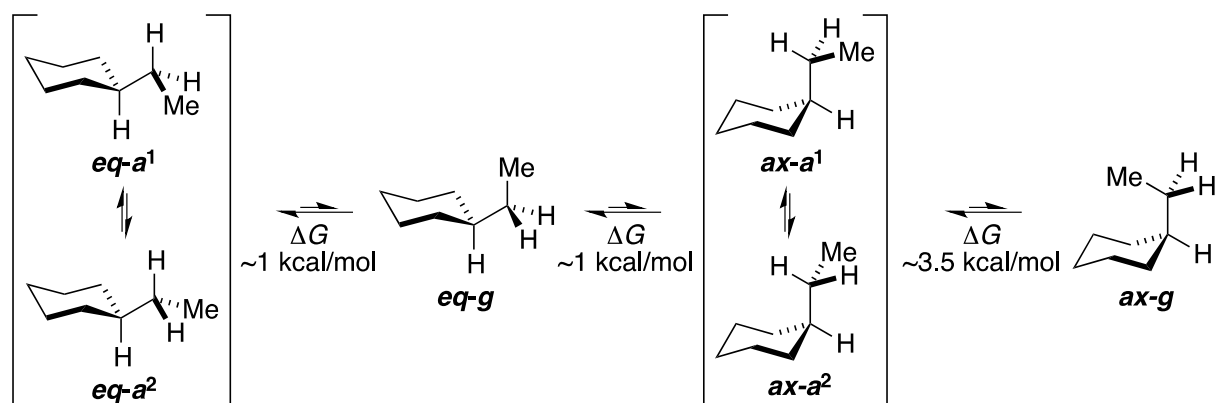

| geometry method          | $E$ (au)    | Thermal correction to Gibbs Free Energy (au/Particle) |
|--------------------------|-------------|-------------------------------------------------------|
| <b>eq-a</b> RHF/6-31G(d) | -312.276376 | 0.210477                                              |
| <b>eq-g</b> RHF/6-31G(d) | -312.274627 | 0.210716                                              |
| <b>ax-a</b> RHF/6-31G(d) | -312.272626 | 0.210864                                              |
| <b>ax-g</b> RHF/6-31G(d) | -312.265866 | 0.210883                                              |

| energy method                        | $E$ (au)    | $G$ (au)    | rel $G$ (kcal/mol) | Population % | A-value (kcal/mol) |
|--------------------------------------|-------------|-------------|--------------------|--------------|--------------------|
| <b>eq-a</b> Rwb97X-D/6-311+G(2df,2p) | -314.515403 | -314.30426  | 0                  | 42.6         | 1.76               |
| <b>eq-g</b> Rwb97X-D/6-311+G(2df,2p) | -314.514278 | -314.303562 | 0.856              | 10.0         |                    |
| <b>ax-a</b> Rwb97X-D/6-311+G(2df,2p) | -314.513091 | -314.302227 | 1.693              | 2.4          |                    |
| <b>ax-g</b> Rwb97X-D/6-311+G(2df,2p) | -314.507598 | -314.296715 | 5.152              | 0.007        |                    |
| <b>eq-a</b> RM06-2X/6-311+G(2df,2p)  | -314.443178 | -314.232700 | 0                  | 43.7         | 1.93               |
| <b>eq-g</b> RM06-2X /6-311+G(2df,2p) | -314.441925 | -314.231209 | 0.936              | 9.0          |                    |
| <b>ax-a</b> RM06-2X/6-311+G(2df,2p)  | -314.440576 | -314.229712 | 1.875              | 1.8          |                    |
| <b>ax-g</b> RM06-2X /6-311+G(2df,2p) | -314.434338 | -314.223455 | 5.801              | 0.002        |                    |

| geometry method        | $E$ (au)    | Thermal correction to Gibbs Free Energy (au/Particle) |
|------------------------|-------------|-------------------------------------------------------|
| <b>eq-a</b> RHF/6-31G* | -312.276375 | 0.209883                                              |
| <b>eq-g</b> RHF/6-31G* | -312.274627 | 0.210133                                              |
| <b>ax-a</b> RHF/6-31G* | -312.272625 | 0.210250                                              |
| <b>ax-g</b> RHF/6-31G* | -312.265866 | 0.210256                                              |

| energy method                        | $E$ (au)    | $G$ (au)    | rel $G$ (kcal/mol) | Population % | A-value (kcal/mol) |
|--------------------------------------|-------------|-------------|--------------------|--------------|--------------------|
| <b>eq-a</b> Rwb97X-V/6-311+G(2df,2p) | -314.522646 | -314.589138 | 0                  | 43.7         | 1.89               |
| <b>eq-g</b> Rwb97X-V/6-311+G(2df,2p) | -314.521366 | -314.587608 | 0.960              | 8.6          |                    |

|                                      |             |             |       |       |     |
|--------------------------------------|-------------|-------------|-------|-------|-----|
| <b>ax-a</b> Rwb97X-V/6-311+G(2df,2p) | -314.520085 | -314.586210 | 1.837 | 1.9   | 3.9 |
| <b>ax-g</b> Rwb97X-V/6-311+G(2df,2p) | -314.514112 | -314.580231 | 5.589 | 0.002 |     |

| geometry method             | <i>E</i> (au) | Thermal correction to Gibbs Free Energy (au/Particle) |  |  |  |
|-----------------------------|---------------|-------------------------------------------------------|--|--|--|
| <b>eq-a</b> RB3LYP/6-31G(d) | -314.507808   | 0.195074                                              |  |  |  |
| <b>eq-g</b> RB3LYP/6-31G(d) | -314.506199   | 0.195343                                              |  |  |  |
| <b>ax-a</b> RB3LYP/6-31G(d) | -314.504319   | 0.195420                                              |  |  |  |
| <b>ax-g</b> RB3LYP/6-31G(d) | -314.498536   | 0.195677                                              |  |  |  |

| energy method                         | <i>E</i> (au) | <i>G</i> (au) | rel <i>G</i> (kcal/mol) | Population % | A-value (kcal/mol) |
|---------------------------------------|---------------|---------------|-------------------------|--------------|--------------------|
| <b>eq-a</b> RB3LYP-D3/6-311+G(2df,2p) | -314.631105   | -314.436032   | 0                       | 44.1         | 96.7               |
| <b>eq-g</b> RB3LYP-D3/6-311+G(2df,2p) | -314.629819   | -314.434485   | 0.971                   | 8.5          |                    |
| <b>ax-a</b> RB3LYP-D3/6-311+G(2df,2p) | -314.628401   | -314.432925   | 1.950                   | 1.6          | 2.00               |
| <b>ax-g</b> RB3LYP-D3/6-311+G(2df,2p) | -314.622826   | -314.427215   | 5.533                   | 0.004        | 3.3                |
| <b>eq-a</b> Rwb97X-D/6-311+G(2df,2p)  | -314.515090   | -314.320017   | 0                       | 42.6         | 95.1               |
| <b>eq-g</b> Rwb97X-D/6-311+G(2df,2p)  | -314.513988   | -314.318653   | 0.856                   | 10.0         |                    |
| <b>ax-a</b> Rwb97X-D/6-311+G(2df,2p)  | -314.512805   | -314.317329   | 1.687                   | 2.4          | 1.75               |
| <b>ax-g</b> Rwb97X-D/6-311+G(2df,2p)  | -314.507373   | -314.311762   | 5.180                   | 0.007        | 4.9                |
| <b>eq-a</b> RM06-2X/6-311+G(2df,2p)   | -314.442790   | -314.247717   | 0                       | 43.6         | 96.2               |
| <b>eq-g</b> RM06-2X/6-311+G(2df,2p)   | -314.441573   | -314.246239   | 0.927                   | 9.1          |                    |
| <b>ax-a</b> RM06-2X/6-311+G(2df,2p)   | -314.440231   | -314.244755   | 1.859                   | 1.9          | 1.92               |
| <b>ax-g</b> RM06-2X/6-311+G(2df,2p)   | -314.434050   | -314.238438   | 5.822                   | 0.002        | 3.8                |

| geometry method           | <i>E</i> (au) | Thermal correction to Gibbs Free Energy (au/Particle) |  |  |  |
|---------------------------|---------------|-------------------------------------------------------|--|--|--|
| <b>eq-a</b> RB3LYP/6-31G* | -314.507818   | 0.183156                                              |  |  |  |
| <b>eq-g</b> RB3LYP/6-31G* | -314.506203   | 0.183434                                              |  |  |  |
| <b>ax-a</b> RB3LYP/6-31G* | -314.504324   | 0.183477                                              |  |  |  |
| <b>ax-g</b> RB3LYP/6-31G* | -314.498537   | 0.183724                                              |  |  |  |

| energy method                        | <i>E</i> (au) | <i>G</i> (au) | rel <i>G</i> (kcal/mol) | Population % | A-value (kcal/mol) |
|--------------------------------------|---------------|---------------|-------------------------|--------------|--------------------|
| <b>eq-a</b> Rwb97X-V/6-311+G(2df,2p) | -314.523131   | -314.339975   | 0                       | 43.6         | 95.8               |
| <b>eq-g</b> Rwb97X-V/6-311+G(2df,2p) | -314.521871   | -314.338437   | 0.965                   | 8.5          |                    |
| <b>ax-a</b> Rwb97X-V/6-311+G(2df,2p) | -314.520607   | -314.337130   | 1.785                   | 2.1          | 1.84               |
| <b>ax-g</b> Rwb97X-V/6-311+G(2df,2p) | -314.514692   | -314.330968   | 5.652                   | 0.003        | 4.2                |

| geometry method                | $E$ (au)    | Thermal correction to Gibbs Free Energy (au/Particle) |  |  |  |
|--------------------------------|-------------|-------------------------------------------------------|--|--|--|
| <b>eq-a</b> RB3LYP-D3/6-31G(d) | -314.527898 | 0.195902                                              |  |  |  |
| <b>eq-g</b> RB3LYP-D3/6-31G(d) | -314.526736 | 0.196220                                              |  |  |  |
| <b>ax-a</b> RB3LYP-D3/6-31G(d) | -314.525284 | 0.196340                                              |  |  |  |
| <b>ax-g</b> RB3LYP-D3/6-31G(d) | -314.519768 | 0.196100                                              |  |  |  |

  

| energy method                        | $E$ (au)    | $G$ (au)    | rel $G$ (kcal/mol) | Population % | A-value (kcal/mol) |
|--------------------------------------|-------------|-------------|--------------------|--------------|--------------------|
| <b>eq-a</b> RM06-2X/6-311+G(2df,2p)  | -314.442976 | -314.247073 | 0                  | 43.5         | 95.8               |
| <b>eq-g</b> RM06-2X /6-311+G(2df,2p) | -314.441801 | -314.245581 | 0.9367             | 8.9          |                    |
| <b>ax-a</b> RM06-2X/6-311+G(2df,2p)  | -314.440550 | -314.244210 | 1.797              | 2.1          | 4.2                |
| <b>ax-g</b> RM06-2X /6-311+G(2df,2p) | -314.434296 | -314.238196 | 5.571              | 0.003        |                    |

  

| geometry method               | $E$ (au)    | Thermal correction to Gibbs Free Energy (au/Particle) |  |  |  |
|-------------------------------|-------------|-------------------------------------------------------|--|--|--|
| <b>eq-a</b> RwB97X-D/6-31G(d) | -314.421265 | 0.197654                                              |  |  |  |
| <b>eq-g</b> RwB97X-D/6-31G(d) | -314.420268 | 0.197784                                              |  |  |  |
| <b>ax-a</b> RwB97X-D/6-31G(d) | -314.419106 | 0.198003                                              |  |  |  |
| <b>ax-g</b> RwB97X-D/6-31G(d) | -314.413624 | 0.197566                                              |  |  |  |

  

| energy method                        | $E$ (au)    | $G$ (au)    | rel $G$ (kcal/mol) | Population % | A-value (kcal/mol) |
|--------------------------------------|-------------|-------------|--------------------|--------------|--------------------|
| <b>eq-a</b> RwB97X-D/6-311+G(2df,2p) | -314.515603 | -314.317950 | 0                  | 41.5         | 94.4               |
| <b>eq-g</b> RwB97X-D/6-311+G(2df,2p) | -314.514525 | -314.316741 | 0.759              | 11.59        |                    |
| <b>ax-a</b> RwB97X-D/6-311+G(2df,2p) | -314.513405 | -314.315403 | 1.598              | 2.8          | 5.5                |
| <b>ax-g</b> RwB97X-D/6-311+G(2df,2p) | -314.507972 | -314.310406 | 4.733              | 0.01         |                    |

  

|                                      |             |             |       |       |      |
|--------------------------------------|-------------|-------------|-------|-------|------|
| <b>eq-a</b> RM06-2X/6-311+G(2df,2p)  | -314.443421 | -314.245767 | 0     | 42.4  | 95.2 |
| <b>eq-g</b> RM06-2X /6-311+G(2df,2p) | -314.442236 | -314.244452 | 0.825 | 10.5  |      |
| <b>ax-a</b> RM06-2X/6-311+G(2df,2p)  | -314.441057 | -314.243054 | 1.702 | 2.4   | 4.8  |
| <b>ax-g</b> RM06-2X /6-311+G(2df,2p) | -314.434736 | -314.237170 | 5.395 | 0.005 |      |

  

| geometry method             | $E$ (au)    | Thermal correction to Gibbs Free Energy (au/Particle) |  |  |  |
|-----------------------------|-------------|-------------------------------------------------------|--|--|--|
| <b>eq-a</b> RwB97X-D/6-31G* | -314.421272 | 0.183204                                              |  |  |  |
| <b>eq-g</b> RwB97X-D/6-31G* | -314.420266 | 0.183330                                              |  |  |  |
| <b>ax-a</b> RwB97X-D/6-31G* | -314.41910  | 0.183605                                              |  |  |  |
| <b>ax-g</b> RwB97X-D/6-31G* | -314.413620 | 0.182854                                              |  |  |  |

| energy method                                 | $E$ (au)    | $G$ (au)                                              | rel $G$ (kcal/mol) | Population % | A-value (kcal/mol) |
|-----------------------------------------------|-------------|-------------------------------------------------------|--------------------|--------------|--------------------|
| <b>eq-a</b> R $\omega$ B97X-V/6-311+G(2df,2p) | -314.523478 | -314.340274                                           | 0                  | 42.8         | 95.8<br>1.85       |
| <b>eq-g</b> R $\omega$ B97X-V/6-311+G(2df,2p) | -314.522252 | -314.338922                                           | 0.848              | 10.2         |                    |
| <b>ax-a</b> R $\omega$ B97X-V/6-311+G(2df,2p) | -314.521030 | -314.337425                                           | 1788               | 2.1          |                    |
| <b>ax-g</b> R $\omega$ B97X-V/6-311+G(2df,2p) | -314.515060 | -314.332206                                           | 5.063              | 0.008        |                    |
| geometry method                               | $E$ (au)    | Thermal correction to Gibbs Free Energy (au/Particle) |                    |              |                    |
| <b>eq-a</b> RM06-2X/6-31G(d)                  | -314.339710 | 0.197193                                              |                    |              |                    |
| <b>eq-g</b> RM06-2X/9-31G(d)                  | -314.338577 | 0.197253                                              |                    |              |                    |
| <b>ax-a</b> RM06-2X/6-31G(d)                  | -314.337370 | 0.197878                                              |                    |              |                    |
| <b>ax-g</b> RM06-2X/6-31G(d)                  | -314.331069 | 0.197689                                              |                    |              |                    |
| energy method                                 | $E$ (au)    | $G$ (au)                                              | rel $G$ (kcal/mol) | Population % | A-value (kcal/mol) |
| <b>eq-a</b> RM06-2X/6-311+G(2df,2p)           | -314.443548 | -314.246354                                           | 0                  | 42.6         | 96.5<br>1.97       |
| <b>eq-g</b> RM06-2X /6-311+G(2df,2p)          | -314.442355 | -314.245102                                           | 0.786              | 11.3         |                    |
| <b>ax-a</b> RM06-2X/6-311+G(2df,2p)           | -314.441217 | -314.243339                                           | 1.892              | 1.7          |                    |
| <b>ax-g</b> RM06-2X /6-311+G(2df,2p)          | -314.434904 | -314.237215                                           | 5.735              | 0.003        |                    |
| geometry method                               | $E$ (au)    | Thermal correction to Gibbs Free Energy (au/Particle) |                    |              |                    |
| <b>eq-a</b> R $\omega$ B97X-V/6-31G*          | -314.427702 | 0.197090                                              |                    |              |                    |
| <b>eq-g</b> R $\omega$ B97X-V/6-31G*          | -314.426580 | 0.197277                                              |                    |              |                    |
| <b>ax-a</b> R $\omega$ B97X-V/6-31G*          | -314.425339 | 0.197531                                              |                    |              |                    |
| <b>ax-g</b> R $\omega$ B97X-V/6-31G*          | -314.419452 | 0.197008                                              |                    |              |                    |
| energy method                                 | $E$ (au)    | $G$ (au)                                              | rel $G$ (kcal/mol) | Population % | A-value (kcal/mol) |
| <b>eq-a</b> RM06-2X/6-311+G(2df,2p)           | -314.443631 | -314.246541                                           | 0                  | 42.8         | 95.7<br>1.83       |
| <b>eq-g</b> RM06-2X /6-311+G(2df,2p)          | -314.442453 | -314.245176                                           | 0.857              | 10.0         |                    |
| <b>ax-a</b> RM06-2X/6-311+G(2df,2p)           | -314.441258 | -314.243727                                           | 1.766              | 2.2          |                    |
| <b>ax-g</b> RM06-2X /6-311+G(2df,2p)          | -314.434952 | -314.237944                                           | 5.395              | 0.005        |                    |
| <b>eq-a</b> R $\omega$ B97X-V/6-311+G(2df,2p) | -314.523297 | -314.326207                                           | 0                  | 43.2         | 96.0<br>1.88       |
| <b>eq-g</b> R $\omega$ B97X-V/6-311+G(2df,2p) | -314.522067 | -314.324790                                           | 0.889              | 9.6          |                    |
| <b>ax-a</b> R $\omega$ B97X-V/6-311+G(2df,2p) | -314.520847 | -314.323316                                           | 1.814              | 2.0          |                    |
| <b>ax-g</b> R $\omega$ B97X-V/6-311+G(2df,2p) | -314.514875 | -314.317867                                           | 5.233              | 0.006        |                    |
| geometry method                               | $E$ (au)    | Thermal correction to Gibbs Free Energy (au/Particle) |                    |              |                    |

|                               |             |          |
|-------------------------------|-------------|----------|
| <b>eq-a</b> RMP2(FC)/6-31G(d) | -313.326482 | 0.200335 |
| <b>eq-g</b> RMP2(FC)/6-31G(d) | -313.325160 | 0.200509 |
| <b>ax-a</b> RMP2(FC)/6-31G(d) | -313.323774 | 0.200786 |
| <b>ax-g</b> RMP2(FC)/6-31G(d) | -313.317047 | 0.200286 |

| energy method                        | <i>E</i> (au) | <i>G</i> (au) | rel <i>G</i><br>(kcal/mol) | Population<br>% | A-value<br>(kcal/mol) |
|--------------------------------------|---------------|---------------|----------------------------|-----------------|-----------------------|
| <b>eq-a</b> RM06-2X/6-311+G(2df,2p)  | -314.443538   | -314.243204   | 0                          | 42.8            | 95.8<br>1.85          |
| <b>eq-g</b> RM06-2X /6-311+G(2df,2p) | -314.442362   | -314.241853   | 0.848                      | 10.2            |                       |
| <b>ax-a</b> RM06-2X/6-311+G(2df,2p)  | -314.441151   | -314.240365   | 1.782                      | 2.1             |                       |
| <b>ax-g</b> RM06-2X /6-311+G(2df,2p) | -314.434822   | -314.234536   | 5.439                      | 0.004           |                       |
| <b>eq-a</b> RMP2(FC)/6-311+G(2df,2p) | -313.740428   | -313.540094   | 0                          | 43.0            | 95.4<br>1.80          |
| <b>eq-a</b> RMP2(FC)/6-311+G(2df,2p) | -313.739171   | -313.538662   | 0.898                      | 9.4             |                       |
| <b>eq-a</b> RMP2(FC)/6-311+G(2df,2p) | -313.738114   | -313.537328   | 1.736                      | 2.3             |                       |
| <b>eq-a</b> RMP2(FC)/6-311+G(2df,2p) | -313.731461   | -313.531174   | 5.597                      | 0.003           |                       |

| geometry method             | <i>E</i> (au) | Thermal correction to Gibbs Free Energy (au/Particle) |  |  |  |
|-----------------------------|---------------|-------------------------------------------------------|--|--|--|
| <b>eq-a</b> RMP2(FC)/6-31G* | -313.326482   | 0.199764                                              |  |  |  |
| <b>eq-g</b> RMP2(FC)/6-31G* | -313.325160   | 0.199948                                              |  |  |  |
| <b>ax-a</b> RMP2(FC)/6-31G* | -313.323774   | 0.200210                                              |  |  |  |
| <b>ax-g</b> RMP2(FC)/6-31G* | -313.317047   | 0.199693                                              |  |  |  |

| energy method                        | <i>E</i> (au) | <i>G</i> (au) | rel <i>G</i><br>(kcal/mol) | Population<br>% | A-value<br>(kcal/mol) |
|--------------------------------------|---------------|---------------|----------------------------|-----------------|-----------------------|
| <b>eq-a</b> Rwb97X-V/6-311+G(2df,2p) | -314.523501   | -314.323737   | 0                          | 43.3            | 96.1<br>1.89          |
| <b>eq-g</b> Rwb97X-V/6-311+G(2df,2p) | -314.522262   | -314.322314   | 0.893                      | 9.5             |                       |
| <b>ax-a</b> Rwb97X-V/6-311+G(2df,2p) | -314.521040   | -314.320830   | 1.824                      | 2.0             |                       |
| <b>ax-g</b> Rwb97X-V/6-311+G(2df,2p) | -314.515055   | -314.315362   | 5.255                      | 0.006           |                       |

| geometry method                 | <i>E</i> (au) | <i>G</i> (au) | rel <i>G</i><br>(kcal/mol) | Population<br>% | A-value<br>(kcal/mol) |
|---------------------------------|---------------|---------------|----------------------------|-----------------|-----------------------|
| <b>eq-a</b> RHF/6-311+G(d,p)    | -312.351909   | -312.144780   | 0                          | 46.9            | 98.9<br>2.66          |
| <b>eq-g</b> RHF/6-311+G(d,p)    | -312.350098   | -312.142706   | 1.301                      | 5.2             |                       |
| <b>ax-a</b> RHF/6-311+G(d,p)    | -312.348157   | -312.140595   | 2.626                      | 0.5             |                       |
| <b>ax-g</b> RHF/6-311+G(d,p)    | -312.341451   | -312.133859   | 6.852                      | 0.0004          |                       |
| <b>eq-a</b> RB3LYP/6-311+G(d,p) | -314.593501   | -314.401054   | 0                          | 47.2            | 98.3<br>2.39          |
| <b>eq-g</b> RB3LYP/6-311+G(d,p) | -314.591839   | -314.398682   | 1.488                      | 3.8             |                       |

|                                    |             |             |        |       |      |      |
|------------------------------------|-------------|-------------|--------|-------|------|------|
| <b>ax-a</b> RB3LYP/6-311+G(d,p)    | -314.590098 | -314.397280 | 2.368  | 0.9   |      |      |
| <b>ax-g</b> RB3LYP/6-311+G(d,p)    | -314.584290 | -314.391238 | 6.160  | 0.001 | 1.7  |      |
| <b>eq-a</b> RB3LYP-D3/6-311+G(d,p) | -314.613591 | -314.420291 | 0      | 44.0  | 96.4 |      |
| <b>eq-g</b> RB3LYP-D3/6-311+G(d,p) | -314.612374 | -314.418738 | 0.9745 | 8.4   |      | 1.93 |
| <b>ax-a</b> RB3LYP-D3/6-311+G(d,p) | -314.611061 | -314.417292 | 1.882  | 1.8   | 3.6  |      |
| <b>ax-g</b> RB3LYP-D3/6-311+G(d,p) | -314.605529 | -314.411973 | 5.220  | 0.006 |      |      |
| <b>eq-a</b> RωB97X-D/6-311+G(d,p)  | -314.499033 | -314.304079 | 0      | 40.3  | 93.2 |      |
| <b>eq-g</b> RωB97X-D/6-311+G(d,p)  | -314.498014 | -314.302985 | 0.686  | 12.6  |      | 1.55 |
| <b>ax-a</b> RωB97X-D/6-311+G(d,p)  | -314.497020 | -314.301745 | 1.465  | 3.4   | 6.8  |      |
| <b>ax-g</b> RωB97X-D/6-311+G(d,p)  | -314.491582 | -314.296557 | 4.720  | 0.01  |      |      |
| <b>eq-a</b> RM06-2X/6-311+G(d,p)   | -314.425966 | -314.230994 | 0      | 42.3  | 96.0 |      |
| <b>eq-g</b> RM06-2X/6-311+G(d,p)   | -314.424828 | -314.229769 | 0.769  | 11.5  |      | 1.88 |
| <b>ax-a</b> RM06-2X/6-311+G(d,p)   | -314.423821 | -314.228120 | 1.803  | 2.0   | 4.0  |      |
| <b>ax-g</b> RM06-2X/6-311+G(d,p)   | -314.417461 | -314.221849 | 5.727  | 0.003 |      |      |
| <b>eq-a</b> RωB97X-V/6-311+G**     | -314.508209 | -314.314295 | 0      | 43.1  | 95.6 |      |
| <b>eq-g</b> RωB97X-V/6-311+G**     | -314.507025 | -314.312870 | 0.894  | 9.5   |      | 1.82 |
| <b>ax-a</b> RωB97X-V/6-311+G**     | -314.505948 | -314.311498 | 1.755  | 2.2   | 4.4  |      |
| <b>ax-g</b> RωB97X-V/6-311+G**     | -314.499981 | -314.306242 | 5.053  | 0.008 |      |      |
| <b>eq-a</b> RMP2(FC)/6-311+G(d,p)  | -313.565686 | -313.369903 | 0      | 42.7  | 96.0 |      |
| <b>eq-g</b> RMP2(FC)/6-311+G(d,p)  | -313.564463 | -313.368577 | 0.832  | 10.4  |      | 1.87 |
| <b>ax-a</b> RMP2(FC)/6-311+G(d,p)  | -313.563511 | -313.367032 | 1.802  | 2.0   | 4.0  |      |
| <b>ax-g</b> RMP2(FC)/6-311+G(d,p)  | -313.556861 | -313.361828 | 5.0667 | 0.008 |      |      |



## Isopropylcyclohexane

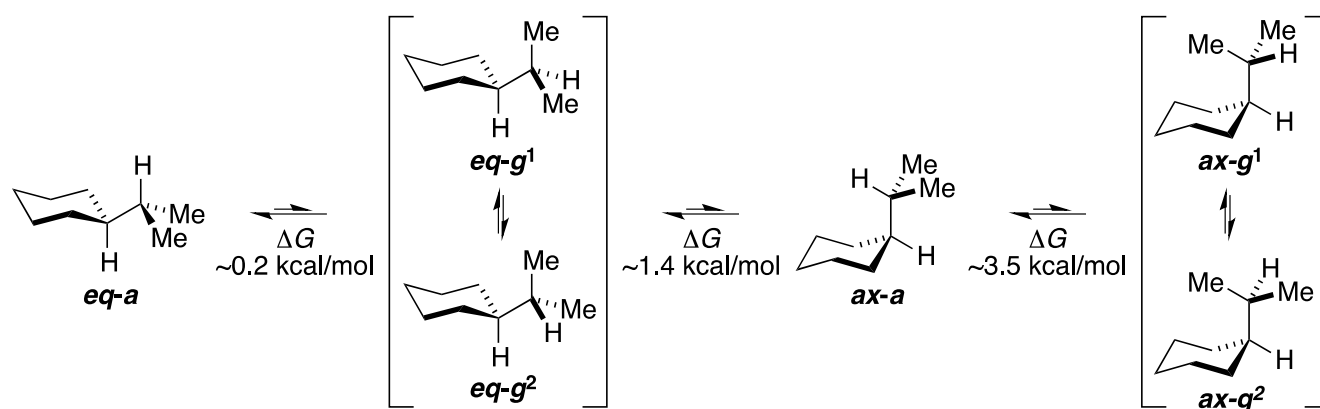

| geometry method          | $E$ (au)    | Thermal correction to Gibbs Free Energy (au/Particle) |
|--------------------------|-------------|-------------------------------------------------------|
| <b>eq-a</b> RHF/6-31G(d) | -351.307183 | 0.238919                                              |
| <b>eq-g</b> RHF/6-31G(d) | -351.307380 | 0.239245                                              |
| <b>ax-a</b> RHF/6-31G(d) | -351.303462 | 0.239372                                              |
| <b>ax-g</b> RHF/6-31G(d) | -351.298128 | 0.239758                                              |

| energy method                        | $E$ (au)    | $G$ (au)    | rel $G$ (kcal/mol) | Population % | A-value (kcal/mol) |
|--------------------------------------|-------------|-------------|--------------------|--------------|--------------------|
| <b>eq-a</b> Rwb97X-D/6-311+G(2df,2p) | -353.829919 | -353.590675 | 0                  | 32.4         | 97.2               |
| <b>eq-g</b> Rwb97X-D/6-311+G(2df,2p) | -353.829593 | -353.590674 | 0.0003             | 32.4         |                    |
| <b>ax-a</b> Rwb97X-D/6-311+G(2df,2p) | -353.827716 | -353.588344 | 1.463              | 2.7          | 2.8                |
| <b>ax-g</b> Rwb97X-D/6-311+G(2df,2p) | -353.823025 | -353.583297 | 4.649              | 0.01         |                    |
| <b>eq-a</b> RM06-2X/6-311+G(2df,2p)  | -353.748710 | -353.509466 | 0.243              | 27.2         | 97.5               |
| <b>eq-g</b> RM06-2X /6-311+G(2df,2p) | -353.748820 | -353.509901 | 0                  | 43.1         |                    |
| <b>ax-a</b> RM06-2X/6-311+G(2df,2p)  | -353.746596 | -353.507224 | 1.680              | 2.5          | 2.16               |
| <b>ax-g</b> RM06-2X /6-311+G(2df,2p) | -353.741009 | -353.501251 | 5.428              | 0.004        |                    |

| geometry method        | $E$ (au)    | Thermal correction to Gibbs Free Energy (au/Particle) |
|------------------------|-------------|-------------------------------------------------------|
| <b>eq-a</b> RHF/6-31G* | -351.307379 | 0.238544                                              |
| <b>eq-g</b> RHF/6-31G* | -351.307182 | 0.238146                                              |
| <b>ax-a</b> RHF/6-31G* | -351.303461 | 0.238510                                              |
| <b>ax-g</b> RHF/6-31G* | -351.298128 | 0.239054                                              |

| energy method                        | $E$ (au)    | $G$ (au)    | rel $G$ (kcal/mol) | Population % | A-value (kcal/mol) |
|--------------------------------------|-------------|-------------|--------------------|--------------|--------------------|
| <b>eq-a</b> Rwb97X-V/6-311+G(2df,2p) | -353.837921 | -353.599377 | 0.144              | 29.7         | 97.3               |

|                                      |             |             |       |       |     |
|--------------------------------------|-------------|-------------|-------|-------|-----|
| <b>eq-g</b> Rwb97X-V/6-311+G(2df,2p) | -353.837752 | -353.599606 | 0     | 37.9  |     |
| <b>ax-a</b> Rwb97X-V/6-311+G(2df,2p) | -353.835631 | -353.597121 | 1.559 | 2.7   |     |
| <b>ax-g</b> Rwb97X-V/6-311+G(2df,2p) | -353.830480 | -353.591426 | 5.133 | 0.006 | 2.7 |

| geometry method             | <i>E</i> (au) | Thermal correction to Gibbs Free Energy (au/Particle) |  |  |  |
|-----------------------------|---------------|-------------------------------------------------------|--|--|--|
| <b>eq-a</b> RB3LYP/6-31G(d) | -353.818893   | 0.221527                                              |  |  |  |
| <b>eq-g</b> RB3LYP/6-31G(d) | -353.818858   | 0.221865                                              |  |  |  |
| <b>ax-a</b> RB3LYP/6-31G(d) | -353.815415   | 0.221829                                              |  |  |  |
| <b>ax-g</b> RB3LYP/6-31G(d) | -353.810838   | 0.222273                                              |  |  |  |

| energy method                         | <i>E</i> (au) | <i>G</i> (au) | rel <i>G</i> (kcal/mol) | Population % | A-value (kcal/mol) |
|---------------------------------------|---------------|---------------|-------------------------|--------------|--------------------|
| <b>eq-a</b> RB3LYP-D3/6-311+G(2df,2p) | -353.959624   | -353.737759   | 0.001                   | 32.6         |                    |
| <b>eq-g</b> RB3LYP-D3/6-311+G(2df,2p) | -353.959288   | -353.737761   | 0                       | 32.7         | 98.0               |
| <b>ax-a</b> RB3LYP-D3/6-311+G(2df,2p) | -353.956965   | -353.735137   | 1.647                   | 2.0          | 2.29               |
| <b>ax-g</b> RB3LYP-D3/6-311+G(2df,2p) | -353.952363   | -353.730090   | 4.814                   | 0.009        | 2.0                |
| <b>eq-a</b> Rwb97X-D/6-311+G(2df,2p)  | -353.829608   | -353.607743   | 0                       | 32.4         |                    |
| <b>eq-g</b> Rwb97X-D/6-311+G(2df,2p)  | -353.829254   | -353.607727   | 0.010                   | 31.9         | 96.7               |
| <b>ax-a</b> Rwb97X-D/6-311+G(2df,2p)  | -353.827423   | -353.605594   | 1.348                   | 3.3          | 1.99               |
| <b>ax-g</b> Rwb97X-D/6-311+G(2df,2p)  | -353.822772   | -353.600498   | 4.546                   | 0.02         | 3.3                |
| <b>eq-a</b> RM06-2X/6-311+G(2df,2p)   | -353.748329   | -353.526464   | 0.250                   | 27.5         |                    |
| <b>eq-g</b> RM06-2X /6-311+G(2df,2p)  | -353.748390   | -353.526863   | 0                       | 42.0         | 96.9               |
| <b>ax-a</b> RM06-2X/6-311+G(2df,2p)   | -353.746230   | -353.524402   | 1.545                   | 3.1          | 2.04               |
| <b>ax-g</b> RM06-2X /6-311+G(2df,2p)  | -353.740654   | -353.518381   | 5.323                   | 0.005        | 3.1                |

| geometry method           | <i>E</i> (au) | Thermal correction to Gibbs Free Energy (au/Particle) |  |  |  |
|---------------------------|---------------|-------------------------------------------------------|--|--|--|
| <b>eq-a</b> RB3LYP/6-31G* | -353.818855   | 0.208322                                              |  |  |  |
| <b>eq-g</b> RB3LYP/6-31G* | -353.818877   | 0.207858                                              |  |  |  |
| <b>ax-a</b> RB3LYP/6-31G* | -353.815414   | 0.208195                                              |  |  |  |
| <b>ax-g</b> RB3LYP/6-31G* | -353.810839   | 0.208759                                              |  |  |  |

| energy method                        | <i>E</i> (au) | <i>G</i> (au) | rel <i>G</i> (kcal/mol) | Population % | A-value (kcal/mol) |
|--------------------------------------|---------------|---------------|-------------------------|--------------|--------------------|
| <b>eq-a</b> Rwb97X-V/6-311+G(2df,2p) | -353.837921   | -353.629599   | 0.185                   | 28.8         |                    |
| <b>eq-g</b> Rwb97X-V/6-311+G(2df,2p) | -353.937752   | -353.629894   | 0                       | 39.4         | 97.1               |
| <b>ax-a</b> Rwb97X-V/6-311+G(2df,2p) | -353.835631   | -353.627436   | 1.542                   | 2.9          | 2.9                |

**ax-g** R**w**B97X-V/6-311+G(2df,2p) -353.830480 -353.621721 5.129 0.007

| geometry method                | <i>E</i> (au) | Thermal correction to Gibbs Free Energy (au/Particle) |  |
|--------------------------------|---------------|-------------------------------------------------------|--|
| <b>eq-a</b> RB3LYP-D3/6-31G(d) | -353.843347   | 0.222296                                              |  |
| <b>eq-g</b> RB3LYP-D3/6-31G(d) | -353.843734   | 0.222890                                              |  |
| <b>ax-a</b> RB3LYP-D3/6-31G(d) | -353.841108   | 0.222451                                              |  |
| <b>ax-g</b> RB3LYP-D3/6-31G(d) | -353.836494   | 0.223255                                              |  |

| energy method                        | <i>E</i> (au) | <i>G</i> (au) | rel <i>G</i> (kcal/mol) | Population % | A-value (kcal/mol) |
|--------------------------------------|---------------|---------------|-------------------------|--------------|--------------------|
| <b>eq-a</b> RM06-2X/6-311+G(2df,2p)  | -353.748585   | -353.525695   | 0.373                   | 24.6         | 95.3               |
| <b>eq-g</b> RM06-2X /6-311+G(2df,2p) | -353.748585   | -353.526290   | 0                       | 46.2         |                    |
| <b>ax-a</b> RM06-2X/6-311+G(2df,2p)  | -353.746590   | -353.524139   | 1.350                   | 4.7          | 4.7                |
| <b>ax-g</b> RM06-2X /6-311+G(2df,2p) | -353.741025   | -353.517770   | 5.346                   | 0.005        |                    |

| geometry method                        | <i>E</i> (au) | Thermal correction to Gibbs Free Energy (au/Particle) |  |
|----------------------------------------|---------------|-------------------------------------------------------|--|
| <b>eq-a</b> R <b>w</b> B97X-D/6-31G(d) | -353.724080   | 0.224524                                              |  |
| <b>eq-g</b> R <b>w</b> B97X-D/6-31G(d) | -353.723675   | 0.224232                                              |  |
| <b>ax-a</b> R <b>w</b> B97X-D/6-31G(d) | -353.721952   | 0.224716                                              |  |
| <b>ax-g</b> R <b>w</b> B97X-D/6-31G(d) | -353.717219   | 0.225478                                              |  |

| energy method                                 | <i>E</i> (au) | <i>G</i> (au) | rel <i>G</i> (kcal/mol) | Population % | A-value (kcal/mol) |
|-----------------------------------------------|---------------|---------------|-------------------------|--------------|--------------------|
| <b>eq-a</b> R <b>w</b> B97X-D/6-311+G(2df,2p) | -353.830226   | -353.605701   | 0                       | 33.4         | 97.1               |
| <b>eq-g</b> R <b>w</b> B97X-D/6-311+G(2df,2p) | -353.829838   | -353.605606   | 0.060                   | 30.2         |                    |
| <b>ax-a</b> R <b>w</b> B97X-D/6-311+G(2df,2p) | -353.828121   | -353.603404   | 1.441                   | 2.9          | 2.9                |
| <b>ax-g</b> R <b>w</b> B97X-D/6-311+G(2df,2p) | -353.823474   | -353.597996   | 4.835                   | 0.009        |                    |
| <b>eq-a</b> RM06-2X/6-311+G(2df,2p)           | -353.749088   | -353.524563   | 0.189                   | 28.7         | 97.1               |
| <b>eq-g</b> RM06-2X/6-311+G(2df,2p)           | -353.749096   | -353.524864   | 0                       | 39.6         |                    |
| <b>ax-a</b> RM06-2X/6-311+G(2df,2p)           | -353.747132   | -353.522242   | 1.537                   | 2.9          | 2.9                |
| <b>ax-g</b> RM06-2X/6-311+G(2df,2p)           | -353.741588   | -353.516110   | 5.493                   | 0.004        |                    |

| geometry method                      | <i>E</i> (au) | Thermal correction to Gibbs Free Energy (au/Particle) |  |
|--------------------------------------|---------------|-------------------------------------------------------|--|
| <b>eq-a</b> R <b>w</b> B97X-D/6-31G* | -353.724079   | 0.208245                                              |  |
| <b>eq-g</b> R <b>w</b> B97X-D/6-31G* | -353.723675   | 0.207682                                              |  |
| <b>ax-a</b> R <b>w</b> B97X-D/6-31G* | -353.721949   | 0.208307                                              |  |
| <b>ax-g</b> R <b>w</b> B97X-D/6-31G* | -353.717217   | 0.209041                                              |  |

| energy method                                 | $E$ (au)    | $G$ (au)                                              | rel $G$ (kcal/mol) | Population % | A-value (kcal/mol) |
|-----------------------------------------------|-------------|-------------------------------------------------------|--------------------|--------------|--------------------|
| <b>eq-a</b> R $\omega$ B97X-V/6-311+G(2df,2p) | -353.838954 | -353.630709                                           | 0.206              | 28.5         | 2.13               |
| <b>eq-g</b> R $\omega$ B97X-V/6-311+G(2df,2p) | -353.838720 | -353.631038                                           | 0                  | 40.4         |                    |
| <b>ax-a</b> R $\omega$ B97X-V/6-311+G(2df,2p) | -353.836769 | -353.628462                                           | 1.616              | 2.6          |                    |
| <b>ax-g</b> R $\omega$ B97X-V/6-311+G(2df,2p) | -353.831611 | -353.622570                                           | 5.314              | 0.005        |                    |
| 97.4                                          |             |                                                       |                    |              |                    |
| geometry method                               | $E$ (au)    | Thermal correction to Gibbs Free Energy (au/Particle) |                    |              |                    |
| <b>eq-a</b> RM06-2X/6-31G(d)                  | -353.632436 | 0.223923                                              |                    |              |                    |
| <b>eq-g</b> RM06-2X/9-31G(d)                  | -353.632427 | 0.224014                                              |                    |              |                    |
| <b>ax-a</b> RM06-2X/6-31G(d)                  | -353.630435 | 0.224264                                              |                    |              |                    |
| <b>ax-g</b> RM06-2X/6-31G(d)                  | -353.624880 | 0.224932                                              |                    |              |                    |
| energy method                                 | $E$ (au)    | $G$ (au)                                              | rel $G$ (kcal/mol) | Population % | A-value (kcal/mol) |
| <b>eq-a</b> RM06-2X/6-311+G(2df,2p)           | -353.749240 | -353.525317                                           | 0                  | 33.4         | 2.06               |
| <b>eq-g</b> RM06-2X /6-311+G(2df,2p)          | -353.749239 | -353.525225                                           | 0.058              | 30.3         |                    |
| <b>ax-a</b> RM06-2X/6-311+G(2df,2p)           | -353.747298 | -353.523035                                           | 1.432              | 3.0          |                    |
| <b>ax-g</b> RM06-2X /6-311+G(2df,2p)          | -353.741786 | -353.516855                                           | 5.310              | 0.004        |                    |
| 97.0                                          |             |                                                       |                    |              |                    |
| geometry method                               | $E$ (au)    | Thermal correction to Gibbs Free Energy (au/Particle) |                    |              |                    |
| <b>eq-a</b> R $\omega$ B97X-V/6-31G*          | -353.731194 | 0.224038                                              |                    |              |                    |
| <b>eq-g</b> R $\omega$ B97X-V/6-31G*          | -353.730946 | 0.223657                                              |                    |              |                    |
| <b>ax-a</b> R $\omega$ B97X-V/6-31G*          | -353.728998 | 0.224161                                              |                    |              |                    |
| <b>ax-g</b> R $\omega$ B97X-V/6-31G*          | -353.723867 | 0.224787                                              |                    |              |                    |
| energy method                                 | $E$ (au)    | $G$ (au)                                              | rel $G$ (kcal/mol) | Population % | A-value (kcal/mol) |
| <b>eq-a</b> RM06-2X/6-311+G(2df,2p)           | -353.749333 | -353.525295                                           | 0.222              | 28.0         | 2.01               |
| <b>eq-g</b> RM06-2X /6-311+G(2df,2p)          | -353.749305 | -353.525648                                           | 0                  | 40.8         |                    |
| <b>ax-a</b> RM06-2X/6-311+G(2df,2p)           | -353.747412 | -353.523251                                           | 1.504              | 3.2          |                    |
| <b>ax-g</b> RM06-2X /6-311+G(2df,2p)          | -353.741859 | -353.517072                                           | 5.381              | 0.005        |                    |
| 96.8                                          |             |                                                       |                    |              |                    |
| energy method                                 | $E$ (au)    | $G$ (au)                                              | rel $G$ (kcal/mol) | Population % | A-value (kcal/mol) |
| <b>eq-a</b> R $\omega$ B97X-V/6-311+G(2df,2p) | -353.838749 | -353.614711                                           | 0.097              | 30.6         | 2.13               |
| <b>eq-g</b> R $\omega$ B97X-V/6-311+G(2df,2p) | -353.838523 | -353.614866                                           | 0                  | 36.1         |                    |
| <b>ax-a</b> R $\omega$ B97X-V/6-311+G(2df,2p) | -353.836565 | -353.612404                                           | 1.545              | 2.6          |                    |
| <b>ax-g</b> R $\omega$ B97X-V/6-311+G(2df,2p) | -353.831411 | -353.606624                                           | 5.172              | 0.006        |                    |
| 97.3                                          |             |                                                       |                    |              |                    |
| geometry method                               | $E$ (au)    | Thermal correction to Gibbs Free Energy (au/Particle) |                    |              |                    |

|                               |             |          |
|-------------------------------|-------------|----------|
| <b>eq-a</b> RMP2(FC)/6-31G(d) | -352.492483 | 0.227689 |
| <b>eq-g</b> RMP2(FC)/6-31G(d) | -352.492289 | 0.227363 |
| <b>ax-a</b> RMP2(FC)/6-31G(d) | -352.490121 | 0.228009 |
| <b>ax-g</b> RMP2(FC)/6-31G(d) | -352.484182 | 0.228384 |

| energy method                        | <i>E</i> (au) | <i>G</i> (au) | rel <i>G</i> (kcal/mol) | Population % | A-value (kcal/mol) |
|--------------------------------------|---------------|---------------|-------------------------|--------------|--------------------|
| <b>eq-a</b> RM06-2X/6-311+G(2df,2p)  | -353.749244   | -353.521554   | 0.210                   | 28.4         | 97.4<br>2.15       |
| <b>eq-g</b> RM06-2X /6-311+G(2df,2p) | -353.749251   | -353.521888   | 0                       | 40.6         |                    |
| <b>ax-a</b> RM06-2X/6-311+G(2df,2p)  | -353.747298   | -353.519289   | 1.631                   | 2.6          |                    |
| <b>ax-g</b> RM06-2X /6-311+G(2df,2p) | -353.741708   | -353.513323   | 5.375                   | 0.005        |                    |
| <b>eq-a</b> RMP2(FC)/6-311+G(2df,2p) | -352.959147   | -352.731457   | 0.134                   | 29.7         | 96.5<br>1.96       |
| <b>eq-a</b> RMP2(FC)/6-311+G(2df,2p) | -352.959033   | -352.731670   | 0                       | 37.2         |                    |
| <b>eq-a</b> RMP2(FC)/6-311+G(2df,2p) | -352.957444   | -352.729435   | 1.403                   | 3.5          |                    |
| <b>eq-a</b> RMP2(FC)/6-311+G(2df,2p) | -352.951446   | -352.723061   | 5.402                   | 0.004        |                    |

| geometry method             | <i>E</i> (au) | Thermal correction to Gibbs Free Energy (au/Particle) |  |
|-----------------------------|---------------|-------------------------------------------------------|--|
| <b>eq-a</b> RMP2(FC)/6-31G* | -352.492482   | 0.227049                                              |  |
| <b>eq-g</b> RMP2(FC)/6-31G* | -352.492289   | 0.226619                                              |  |
| <b>ax-a</b> RMP2(FC)/6-31G* | -352.490121   | 0.227273                                              |  |
| <b>ax-g</b> RMP2(FC)/6-31G* | -352.484182   | 0.227760                                              |  |

| energy method                        | <i>E</i> (au) | <i>G</i> (au) | rel <i>G</i> (kcal/mol) | Population % | A-value (kcal/mol) |
|--------------------------------------|---------------|---------------|-------------------------|--------------|--------------------|
| <b>eq-a</b> Rwb97X-V/6-311+G(2df,2p) | -353.838974   | -353.611925   | 0.134                   | 30.0         | 97.7<br>2.21       |
| <b>eq-g</b> Rwb97X-V/6-311+G(2df,2p) | -353.836784   | -353.610165   | 0                       | 37.7         |                    |
| <b>ax-a</b> Rwb97X-V/6-311+G(2df,2p) | -353.836784   | -353.609511   | 1.650                   | 2.3          |                    |
| <b>ax-g</b> Rwb97X-V/6-311+G(2df,2p) | -353.831622   | -353.603862   | 5.194                   | 0.006        |                    |

| geometry method                 | <i>E</i> (au) | <i>G</i> (au) | rel <i>G</i> (kcal/mol) | Population % | A-value (kcal/mol) |
|---------------------------------|---------------|---------------|-------------------------|--------------|--------------------|
| <b>eq-a</b> RHF/6-311+G(d,p)    | -351.392424   | -351.156980   | 0.092                   | 31.4         | 99.6<br>3.20       |
| <b>eq-g</b> RHF/6-311+G(d,p)    | -351.392244   | -351.157126   | 0                       | 36.7         |                    |
| <b>ax-a</b> RHF/6-311+G(d,p)    | -351.388567   | -351.152955   | 2.617                   | 0.4          |                    |
| <b>ax-g</b> RHF/6-311+G(d,p)    | -351.383302   | -351.147310   | 6.160                   | 0.001        |                    |
| <b>eq-a</b> RB3LYP/6-311+G(d,p) | -353.915165   | -353.696250   | 0.243                   | 28.3         | 99.2<br>2.83       |
| <b>eq-g</b> RB3LYP/6-311+G(d,p) | -353.915190   | -353.696637   | 0                       | 42.6         |                    |

|                                    |             |             |       |       |      |      |
|------------------------------------|-------------|-------------|-------|-------|------|------|
| <b>ax-a</b> RB3LYP/6-311+G(d,p)    | -353.911844 | -353.692915 | 2.336 | 0.8   |      |      |
| <b>ax-g</b> RB3LYP/6-311+G(d,p)    | -353.907264 | -353.687929 | 5.464 | 0.004 | 0.8  |      |
| <b>eq-a</b> RB3LYP-D3/6-311+G(d,p) | -353.940045 | -353.720079 | 0.149 | 29.5  | 97.1 |      |
| <b>eq-g</b> RB3LYP-D3/6-311+G(d,p) | -353.939654 | -353.720317 | 0     | 38.0  |      | 2.07 |
| <b>ax-a</b> RB3LYP-D3/6-311+G(d,p) | -353.937545 | -353.717893 | 1.521 | 2.9   | 2.9  |      |
| <b>ax-g</b> RB3LYP-D3/6-311+G(d,p) | -353.932923 | -353.712695 | 4.783 | 0.01  |      |      |
| <b>eq-a</b> RωB97X-D/6-311+G(d,p)  | -353.811752 | -353.590121 | 0.101 | 30.2  | 96.3 |      |
| <b>eq-g</b> RωB97X-D/6-311+G(d,p)  | -353.811346 | -353.590282 | 0     | 35.8  |      | 1.92 |
| <b>ax-a</b> RωB97X-D/6-311+G(d,p)  | -353.809828 | -353.588146 | 1.340 | 3.7   | 3.7  |      |
| <b>ax-g</b> RωB97X-D/6-311+G(d,p)  | -353.805116 | -353.582795 | 4.698 | 0.01  |      |      |
| <b>eq-a</b> RM06-2X/6-311+G(d,p)   | -353.729618 | -353.508139 | 0     | 32.6  | 96.7 |      |
| <b>eq-g</b> RM06-2X/6-311+G(d,p)   | -353.729580 | -353.508107 | 0.020 | 31.5  |      | 1.99 |
| <b>ax-a</b> RM06-2X/6-311+G(d,p)   | -353.727839 | -353.505985 | 1.352 | 3.3   | 3.3  |      |
| <b>ax-g</b> RM06-2X/6-311+G(d,p)   | -353.722245 | -353.499503 | 5.419 | 0.003 |      |      |
| <b>eq-a</b> RωB97X-V/6-311+G**     | -353.821898 | -353.601460 | 0.155 | 29.4  | 96.9 |      |
| <b>eq-g</b> RωB97X-V/6-311+G**     | -353.821646 | -353.601707 | 0     | 38.2  |      | 2.03 |
| <b>ax-a</b> RωB97X-V/6-311+G**     | -353.819898 | -353.599344 | 1.483 | 3.1   | 3.1  |      |
| <b>ax-g</b> RωB97X-V/6-311+G**     | -353.814695 | -353.593423 | 5.198 | 0.006 |      |      |
| <b>eq-a</b> RMP2(FC)/6-311+G(d,p)  | -352.762493 | -352.540045 | 0.167 | 29.1  | 96.9 |      |
| <b>eq-g</b> RMP2(FC)/6-311+G(d,p)  | -352.762395 | -352.540311 | 0     | 38.7  |      | 2.04 |
| <b>ax-a</b> RMP2(FC)/6-311+G(d,p)  | -352.761000 | -352.537924 | 1.498 | 3.1   | 3.1  |      |
| <b>ax-g</b> RMP2(FC)/6-311+G(d,p)  | -352.754926 | -352.531504 | 5.526 | 0.003 |      |      |

## Cyclohexylethen

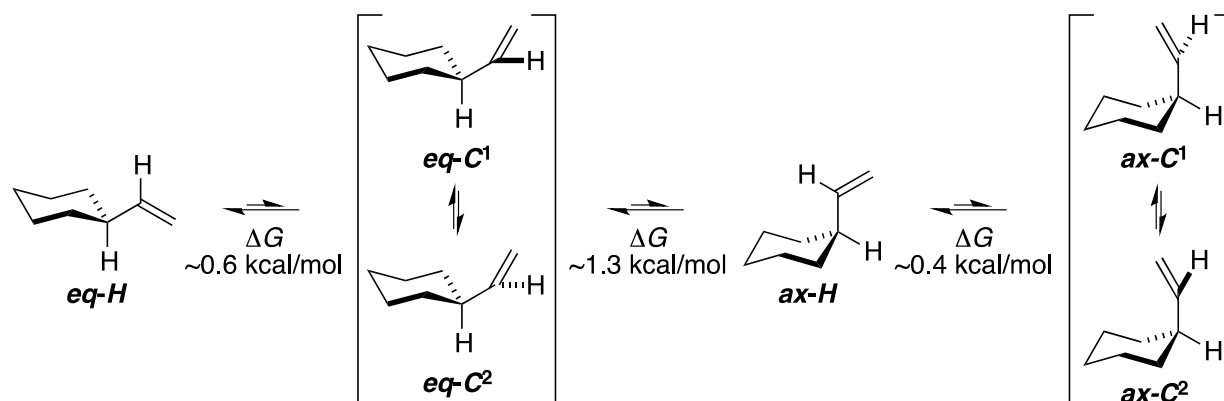

| geometry method          | $E$ (au)    | Thermal correction to Gibbs Free Energy (au/Particle) |
|--------------------------|-------------|-------------------------------------------------------|
| <b>eq-H</b> RHF/6-31G(d) | -311.086009 | 0.185962                                              |
| <b>eq-C</b> RHF/6-31G(d) | -311.084308 | 0.186392                                              |
| <b>ax-H</b> RHF/6-31G(d) | -311.082411 | 0.186311                                              |
| <b>ax-C</b> RHF/6-31G(d) | -311.081083 | 0.186819                                              |

| energy method                        | $E$ (au)    | $G$ (au)    | rel $G$ (kcal/mol) | Population % | A-value (kcal/mol) |
|--------------------------------------|-------------|-------------|--------------------|--------------|--------------------|
| <b>eq-H</b> RωB97X-D/6-311+G(2df,2p) | -313.277100 | -313.091138 | 0                  | 55.2         | 1.76               |
| <b>eq-C</b> RωB97X-D/6-311+G(2df,2p) | -313.276575 | -313.090184 | 0.599              | 20.0         |                    |
| <b>ax-H</b> RωB97X-D/6-311+G(2df,2p) | -313.274521 | -313.088210 | 1.838              | 2.5          |                    |
| <b>ax-C</b> RωB97X-D/6-311+G(2df,2p) | -313.274347 | -313.087528 | 2.266              | 1.2          |                    |
| <b>eq-H</b> RM06-2X/6-311+G(2df,2p)  | -313.216279 | -313.030318 | 0                  | 47.4         | 1.83               |
| <b>eq-C</b> RM06-2X /6-311+G(2df,2p) | -313.216076 | -313.029685 | 0.397              | 24.2         |                    |
| <b>ax-H</b> RM06-2X/6-311+G(2df,2p)  | -313.213536 | -313.027225 | 1.941              | 1.8          |                    |
| <b>ax-C</b> RM06-2X /6-311+G(2df,2p) | -313.213725 | -313.026906 | 2.141              | 1.3          |                    |

| geometry method        | $E$ (au)    | Thermal correction to Gibbs Free Energy (au/Particle) |
|------------------------|-------------|-------------------------------------------------------|
| <b>eq-H</b> RHF/6-31G* | -311.086009 | 0.185415                                              |
| <b>eq-C</b> RHF/6-31G* | -311.084308 | 0.185904                                              |
| <b>ax-H</b> RHF/6-31G* | -311.082411 | 0.185740                                              |
| <b>ax-C</b> RHF/6-31G* | -311.081083 | 0.186289                                              |

| energy method                        | $E$ (au)    | $G$ (au)    | rel $G$ (kcal/mol) | Population % | A-value (kcal/mol) |
|--------------------------------------|-------------|-------------|--------------------|--------------|--------------------|
| <b>eq-H</b> RωB97X-V/6-311+G(2df,2p) | -313.288314 | -313.102899 | 0                  | 60.5         | 1.82               |

|                                      |             |             |       |      |     |
|--------------------------------------|-------------|-------------|-------|------|-----|
| <b>eq-C</b> RωB97X-V/6-311+G(2df,2p) | -313.287690 | -313.101786 | 0.698 | 18.5 |     |
| <b>ax-H</b> RωB97X-V/6-311+G(2df,2p) | -313.285631 | -313.099891 | 1.888 | 2.5  |     |
| <b>ax-C</b> RωB97X-V/6-311+G(2df,2p) | -313.285331 | -313.099042 | 2.420 | 1.0  | 4.5 |

| geometry method             | <i>E</i> (au) | Thermal correction to Gibbs Free Energy (au/Particle) |  |          |  |
|-----------------------------|---------------|-------------------------------------------------------|--|----------|--|
| <b>eq-H</b> RB3LYP/6-31G(d) | -313.272421   |                                                       |  | 0.171712 |  |
| <b>eq-C</b> RB3LYP/6-31G(d) | -313.271200   |                                                       |  | 0.172137 |  |
| <b>ax-H</b> RB3LYP/6-31G(d) | -313.268990   |                                                       |  | 0.172014 |  |
| <b>ax-C</b> RB3LYP/6-31G(d) | -313.268167   |                                                       |  | 0.172478 |  |

| energy method                         | <i>E</i> (au) | <i>G</i> (au) | rel <i>G</i> (kcal/mol) | Population % | A-value (kcal/mol) |
|---------------------------------------|---------------|---------------|-------------------------|--------------|--------------------|
| <b>eq-H</b> RB3LYP-D3/6-311+G(2df,2p) | -313.396031   | -313.224320   | 0                       | 63.4         |                    |
| <b>eq-C</b> RB3LYP-D3/6-311+G(2df,2p) | -313.395197   | -313.223060   | 0.791                   | 16.6         | 96.7               |
| <b>ax-H</b> RB3LYP-D3/6-311+G(2df,2p) | -313.393084   | -313.221070   | 2.039                   | 2.0          |                    |
| <b>ax-C</b> RB3LYP-D3/6-311+G(2df,2p) | -313.392501   | -313.220022   | 2.697                   | 0.7          | 3.3                |
| <b>eq-H</b> RωB97X-D/6-311+G(2df,2p)  | -313.276839   | -313.105127   | 0                       | 53.3         |                    |
| <b>eq-C</b> RωB97X-D/6-311+G(2df,2p)  | -313.276374   | -313.104236   | 0.559                   | 20.7         | 94.7               |
| <b>ax-H</b> RωB97X-D/6-311+G(2df,2p)  | -313.274291   | -313.102277   | 1.789                   | 2.6          |                    |
| <b>ax-C</b> RωB97X-D/6-311+G(2df,2p)  | -313.274159   | -313.101680   | 2.163                   | 1.4          | 5.3                |
| <b>eq-H</b> RM06-2X/6-311+G(2df,2p)   | -313.215975   | -313.044263   | 0                       | 46.2         |                    |
| <b>eq-C</b> RM06-2X /6-311+G(2df,2p)  | -313.215859   | -313.043722   | 0.340                   | 26.0         | 95.0               |
| <b>ax-H</b> RM06-2X/6-311+G(2df,2p)   | -313.213282   | -313.041268   | 1.880                   | 1.9          |                    |
| <b>ax-C</b> RM06-2X /6-311+G(2df,2p)  | -313.213545   | -313.041067   | 2.006                   | 1.5          | 5.0                |

| geometry method           | <i>E</i> (au) | Thermal correction to Gibbs Free Energy (au/Particle) |  |          |  |
|---------------------------|---------------|-------------------------------------------------------|--|----------|--|
| <b>eq-H</b> RB3LYP/6-31G* | -313.273423   |                                                       |  | 0.162024 |  |
| <b>eq-C</b> RB3LYP/6-31G* | -313.271202   |                                                       |  | 0.161462 |  |
| <b>ax-H</b> RB3LYP/6-31G* | -313.268990   |                                                       |  | 0.161291 |  |
| <b>ax-C</b> RB3LYP/6-31G* | -313.268180   |                                                       |  | 0.161820 |  |

| energy method                        | <i>E</i> (au) | <i>G</i> (au) | rel <i>G</i> (kcal/mol) | Population % | A-value (kcal/mol) |
|--------------------------------------|---------------|---------------|-------------------------|--------------|--------------------|
| <b>eq-H</b> RωB97X-V/6-311+G(2df,2p) | -313.288879   | -313.126855   | 0.004                   | 31.8         |                    |
| <b>eq-C</b> RωB97X-V/6-311+G(2df,2p) | -313.288323   | -313.126861   | 0                       | 32.0         | 92.1               |
| <b>ax-H</b> RωB97X-V/6-311+G(2df,2p) | -313.286251   | -313.124960   | 1.193                   | 4.2          | 7.9                |



**ax-C** RωB97X-V/6-311+G(2df,2p) -313.285989 -313.124169 1.689 1.8

| geometry method                | <i>E</i> (au) | Thermal correction to Gibbs Free Energy (au/Particle) |
|--------------------------------|---------------|-------------------------------------------------------|
| <b>eq-H</b> RB3LYP-D3/6-31G(d) | -313.290155   | 0.172318                                              |
| <b>eq-C</b> RB3LYP-D3/6-31G(d) | -313.289384   | 0.172895                                              |
| <b>ax-H</b> RB3LYP-D3/6-31G(d) | -313.287401   | 0.172672                                              |
| <b>ax-C</b> RB3LYP-D3/6-31G(d) | -313.287281   | 0.173289                                              |

| energy method                        | <i>E</i> (au) | <i>G</i> (au) | rel <i>G</i> (kcal/mol) | Population % | A-value (kcal/mol) |
|--------------------------------------|---------------|---------------|-------------------------|--------------|--------------------|
| <b>eq-H</b> RM06-2X/6-311+G(2df,2p)  | -313.216125   | -313.043807   | 0                       | 49.0         | 1.76               |
| <b>eq-C</b> RM06-2X /6-311+G(2df,2p) | -313.215993   | -313.043098   | 0.445                   | 23.1         |                    |
| <b>ax-H</b> RM06-2X/6-311+G(2df,2p)  | -313.214743   | -313.040802   | 1.885                   | 2.0          |                    |
| <b>ax-C</b> RM06-2X /6-311+G(2df,2p) | -313.213747   | -313.040458   | 2.102                   | 1.4          |                    |

| geometry method               | <i>E</i> (au) | Thermal correction to Gibbs Free Energy (au/Particle) |
|-------------------------------|---------------|-------------------------------------------------------|
| <b>eq-H</b> RωB97X-D/6-31G(d) | -313.180401   | 0.173943                                              |
| <b>eq-C</b> RωB97X-D/6-31G(d) | -313.179868   | 0.174494                                              |
| <b>ax-H</b> RωB97X-D/6-31G(d) | -313.178004   | 0.174386                                              |
| <b>ax-C</b> RωB97X-D/6-31G(d) | -313.178182   | 0.174967                                              |

| energy method                        | <i>E</i> (au) | <i>G</i> (au) | rel <i>G</i> (kcal/mol) | Population % | A-value (kcal/mol) |
|--------------------------------------|---------------|---------------|-------------------------|--------------|--------------------|
| <b>eq-H</b> RωB97X-D/6-311+G(2df,2p) | -313.277334   | -313.103391   | 0                       | 57.3         | 1.79               |
| <b>eq-C</b> RωB97X-D/6-311+G(2df,2p) | -313.276847   | -313.102354   | 0.651                   | 19.0         |                    |
| <b>ax-H</b> RωB97X-D/6-311+G(2df,2p) | -313.274797   | -313.100411   | 1.870                   | 2.4          |                    |
| <b>ax-C</b> RωB97X-D/6-311+G(2df,2p) | -313.274627   | -313.099660   | 2.341                   | 1.1          |                    |
| <b>eq-H</b> RM06-2X/6-311+G(2df,2p)  | -313.216540   | -313.042597   | 0                       | 49.4         | 1.81               |
| <b>eq-C</b> RM06-2X /6-311+G(2df,2p) | -313.216427   | -313.041934   | 0.416                   | 24.4         |                    |
| <b>ax-H</b> RM06-2X/6-311+G(2df,2p)  | -313.213881   | -313.039495   | 1.946                   | 1.8          |                    |
| <b>ax-C</b> RM06-2X /6-311+G(2df,2p) | -313.214182   | -313.039216   | 2.122                   | 1.4          |                    |

| geometry method             | <i>E</i> (au) | Thermal correction to Gibbs Free Energy (au/Particle) |
|-----------------------------|---------------|-------------------------------------------------------|
| <b>eq-H</b> RωB97X-D/6-31G* | -313.180401   | 0.160975                                              |
| <b>eq-C</b> RωB97X-D/6-31G* | -313.179872   | 0.161715                                              |
| <b>ax-H</b> RωB97X-D/6-31G* | -313.178004   | 0.161442                                              |
| <b>ax-C</b> RωB97X-D/6-31G* | -313.178191   | 0.162152                                              |

| energy method                                 | $E$ (au)    | $G$ (au)    | rel $G$ (kcal/mol)                                    | Population % | A-value (kcal/mol) |
|-----------------------------------------------|-------------|-------------|-------------------------------------------------------|--------------|--------------------|
| <b>eq-H</b> R $\omega$ B97X-V/6-311+G(2df,2p) | -313.289223 | -313.128248 | 0                                                     | 65.2         | 1.86               |
| <b>eq-C</b> R $\omega$ B97X-V/6-311+G(2df,2p) | -313.288650 | -313.126935 | 0.824                                                 | 16.2         |                    |
| <b>ax-H</b> R $\omega$ B97X-V/6-311+G(2df,2p) | -313.286607 | -313.125165 | 1.935                                                 | 2.5          |                    |
| <b>ax-C</b> R $\omega$ B97X-V/6-311+G(2df,2p) | -313.286317 | -313.124169 | 2.562                                                 | 0.9          |                    |
| geometry method                               |             | $E$ (au)    | Thermal correction to Gibbs Free Energy (au/Particle) |              |                    |
| <b>eq-H</b> RM06-2X/6-31G(d)                  | -313.110050 | 0.173716    |                                                       |              |                    |
| <b>eq-C</b> RM06-2X/6-31G(d)                  | -313.109913 | 0.174230    |                                                       |              |                    |
| <b>ax-H</b> RM06-2X/6-31G(d)                  | -313.107533 | 0.174049    |                                                       |              |                    |
| <b>ax-C</b> RM06-2X/6-31G(d)                  | -313.108213 | 0.174742    |                                                       |              |                    |
| energy method                                 | $E$ (au)    | $G$ (au)    | rel $G$ (kcal/mol)                                    | Population % | A-value (kcal/mol) |
| <b>eq-H</b> RM06-2X/6-311+G(2df,2p)           | -313.216639 | -313.042923 | 0                                                     | 48.2         | 1.80               |
| <b>eq-C</b> RM06-2X /6-311+G(2df,2p)          | -313.216530 | -313.042301 | 0.390                                                 | 24.9         |                    |
| <b>ax-H</b> RM06-2X/6-311+G(2df,2p)           | -313.214003 | -313.039954 | 1.863                                                 | 2.1          |                    |
| <b>ax-C</b> RM06-2X /6-311+G(2df,2p)          | -313.214268 | -313.039526 | 2.132                                                 | 1.3          |                    |
| geometry method                               |             | $E$ (au)    | Thermal correction to Gibbs Free Energy (au/Particle) |              |                    |
| <b>eq-H</b> R $\omega$ B97X-V/6-31G*          | -313.190093 | 0.173587    |                                                       |              |                    |
| <b>eq-C</b> R $\omega$ B97X-V/6-31G*          | -313.189514 | 0.174233    |                                                       |              |                    |
| <b>ax-H</b> R $\omega$ B97X-V/6-31G*          | -313.187629 | 0.173959    |                                                       |              |                    |
| <b>ax-C</b> R $\omega$ B97X-V/6-31G*          | -313.187842 | 0.174651    |                                                       |              |                    |
| energy method                                 | $E$ (au)    | $G$ (au)    | rel $G$ (kcal/mol)                                    | Population % | A-value (kcal/mol) |
| <b>eq-H</b> RM06-2X/6-311+G(2df,2p)           | -313.217457 | -313.043870 | 0                                                     | 50.6         | 1.76               |
| <b>eq-C</b> RM06-2X /6-311+G(2df,2p)          | -313.217331 | -313.043098 | 0.484                                                 | 22.3         |                    |
| <b>ax-H</b> RM06-2X/6-311+G(2df,2p)           | -313.214879 | -313.040920 | 1.851                                                 | 2.2          |                    |
| <b>ax-C</b> RM06-2X /6-311+G(2df,2p)          | -313.215085 | -313.040434 | 2.156                                                 | 1.3          |                    |
| <b>eq-H</b> R $\omega$ B97X-V/6-311+G(2df,2p) | -313.289061 | -313.115474 | 0                                                     | 61.9         | 1.82               |
| <b>eq-C</b> R $\omega$ B97X-V/6-311+G(2df,2p) | -313.288482 | -313.114249 | 0.769                                                 | 16.9         |                    |
| <b>ax-H</b> R $\omega$ B97X-V/6-311+G(2df,2p) | -313.286447 | -313.112488 | 1.874                                                 | 2.6          |                    |
| <b>ax-C</b> R $\omega$ B97X-V/6-311+G(2df,2p) | -313.286136 | -313.111485 | 2.503                                                 | 0.9          |                    |
| geometry method                               |             | $E$ (au)    | Thermal correction to Gibbs Free Energy (au/Particle) |              |                    |

|                               |             |          |
|-------------------------------|-------------|----------|
| <b>eq-H</b> RMP2(FC)/6-31G(d) | -312.123120 | 0.175794 |
| <b>eq-C</b> RMP2(FC)/6-31G(d) | -312.121864 | 0.176313 |
| <b>ax-H</b> RMP2(FC)/6-31G(d) | -312.120665 | 0.176219 |
| <b>ax-C</b> RMP2(FC)/6-31G(d) | -312.119941 | 0.176784 |

| energy method                        | <i>E</i> (au) | <i>G</i> (au) | rel <i>G</i> (kcal/mol) | Population % | A-value (kcal/mol) |
|--------------------------------------|---------------|---------------|-------------------------|--------------|--------------------|
| <b>eq-H</b> RM06-2X/6-311+G(2df,2p)  | -313.216436   | -313.040642   | 0                       | 46.9         | 95.8<br>1.84       |
| <b>eq-C</b> RM06-2X /6-311+G(2df,2p) | -313.216340   | -313.040027   | 0.386                   | 24.4         |                    |
| <b>ax-H</b> RM06-2X/6-311+G(2df,2p)  | -313.214019   | -313.037800   | 1.783                   | 2.3          |                    |
| <b>ax-C</b> RM06-2X /6-311+G(2df,2p) | -313.213781   | -313.036996   | 2.288                   | 1.0          |                    |
| <b>eq-H</b> RMP2(FC)/6-311+G(2df,2p) | -312.520412   | -312.344618   | 0                       | 63.9         | 95.2<br>1.78       |
| <b>eq-C</b> RMP2(FC)/6-311+G(2df,2p) | -312.519667   | -312.343353   | 0.794                   | 16.7         |                    |
| <b>ax-H</b> RMP2(FC)/6-311+G(2df,2p) | -312.517876   | -312.341657   | 1.858                   | 2.7          |                    |
| <b>ax-C</b> RMP2(FC)/6-311+G(2df,2p) | -312.517502   | -312.340718   | 2.448                   | 1.0          |                    |

| geometry method             | <i>E</i> (au) | Thermal correction to Gibbs Free Energy (au/Particle) |
|-----------------------------|---------------|-------------------------------------------------------|
| <b>eq-H</b> RMP2(FC)/6-31G* | -312.123120   | 0.175365                                              |
| <b>eq-C</b> RMP2(FC)/6-31G* | -312.121864   | 0.176001                                              |
| <b>ax-H</b> RMP2(FC)/6-31G* | -312.120665   | 0.175804                                              |
| <b>ax-C</b> RMP2(FC)/6-31G* | -312.119941   | 0.176435                                              |

| energy method                        | <i>E</i> (au) | <i>G</i> (au) | rel <i>G</i> (kcal/mol) | Population % | A-value (kcal/mol) |
|--------------------------------------|---------------|---------------|-------------------------|--------------|--------------------|
| <b>eq-H</b> RωB97X-V/6-311+G(2df,2p) | -313.289102   | -313.113737   | 0                       | 62.9         | 96.0<br>1.88       |
| <b>eq-C</b> RωB97X-V/6-311+G(2df,2p) | -313.288527   | -313.112526   | 0.760                   | 17.4         |                    |
| <b>ax-H</b> RωB97X-V/6-311+G(2df,2p) | -313.286455   | -313.110651   | 1.936                   | 2.4          |                    |
| <b>ax-C</b> RωB97X-V/6-311+G(2df,2p) | -313.286105   | -313.109670   | 2.552                   | 0.8          |                    |

| geometry method                 | <i>E</i> (au) | <i>G</i> (au) | rel <i>G</i> (kcal/mol) | Population % | A-value (kcal/mol) |
|---------------------------------|---------------|---------------|-------------------------|--------------|--------------------|
| <b>eq-H</b> RHF/6-311+G(d,p)    | -311.163503   | -310.980521   | 0                       | 82.3         | 98.8<br>2.58       |
| <b>eq-C</b> RHF/6-311+G(d,p)    | -311.161745   | -310.978354   | 1.360                   | 8.2          |                    |
| <b>ax-H</b> RHF/6-311+G(d,p)    | -311.159793   | -310.976425   | 2.570                   | 1.1          |                    |
| <b>ax-C</b> RHF/6-311+G(d,p)    | -311.157912   | -310.9741148  | 3.999                   | 0.09         |                    |
| <b>eq-H</b> RB3LYP/6-311+G(d,p) | -313.360268   | -313.190781   | 0                       | 74.0         | 98.2<br>2.35       |
| <b>eq-C</b> RB3LYP/6-311+G(d,p) | -313.358939   | -313.189074   | 1.071                   | 12.1         |                    |

|                                            |             |              |       |      |      |      |
|--------------------------------------------|-------------|--------------|-------|------|------|------|
| <b>ax-H</b> RB3LYP/6-311+G(d,p)            | -313.356788 | -313.187032  | 2.353 | 1.4  |      |      |
| <b>ax-C</b> RB3LYP/6-311+G(d,p)            | -313.355511 | -313.185333  | 3.419 | 0.2  | 1.8  |      |
| <b>eq-H</b> RB3LYP-D3/6-311+G(d,p)         | -313.378001 | -313.207984  | 0     | 69.1 | 96.6 |      |
| <b>eq-C</b> RB3LYP-D3/6-311+G(d,p)         | -313.377115 | -313.206467  | 0.952 | 13.8 |      | 1.98 |
| <b>ax-H</b> RB3LYP-D3/6-311+G(d,p)         | -313.375203 | -313.204689  | 2.068 | 2.1  | 3.4  |      |
| <b>ax-C</b> RB3LYP-D3/6-311+G(d,p)         | -313.374561 | -313.203586  | 2.760 | 0.6  |      |      |
| <b>eq-H</b> R $\omega$ B97X-D/6-311+G(d,p) | -313.260373 | -313.088864  | 0     | 61.2 | 94.8 |      |
| <b>eq-C</b> R $\omega$ B97X-D/6-311+G(d,p) | -313.259802 | -313.087646  | 0.764 | 16.8 |      | 1.71 |
| <b>ax-H</b> R $\omega$ B97X-D/6-311+G(d,p) | -313.257990 | -313.085896  | 1.862 | 2.6  | 5.2  |      |
| <b>ax-C</b> R $\omega$ B97X-D/6-311+G(d,p) | -313.257762 | -313.0835247 | 2.270 | 1.3  |      |      |
| <b>eq-H</b> RM06-2X/6-311+G(d,p)           | -313.198445 | -313.026664  | 0     | 50.7 | 94.5 |      |
| <b>eq-C</b> RM06-2X/6-311+G(d,p)           | -313.198183 | -313.025874  | 0.496 | 21.9 |      | 1.68 |
| <b>ax-H</b> RM06-2X/6-311+G(d,p)           | -313.195974 | -313.023804  | 1.795 | 2.4  | 5.5  |      |
| <b>ax-C</b> RM06-2X/6-311+G(d,p)           | -313.196112 | -313.023370  | 2.067 | 1.5  |      |      |
| <b>eq-H</b> R $\omega$ B97X-V/6-311+G**    | -313.273341 | -313.102658  | 0     | 62.9 | 95.3 |      |
| <b>eq-C</b> R $\omega$ B97X-V/6-311+G**    | -313.272627 | -313.101384  | 0.799 | 16.2 |      | 1.78 |
| <b>ax-H</b> R $\omega$ B97X-V/6-311+G**    | -313.270888 | -313.099697  | 1.858 | 2.7  | 4.7  |      |
| <b>ax-C</b> R $\omega$ B97X-V/6-311+G**    | -313.270498 | -313.098742  | 2.457 | 1.0  |      |      |
| <b>eq-H</b> RMP2(FC)/6-311+G(d,p)          | -312.347633 | -312.175707  | 0     | 74.2 | 95.5 |      |
| <b>eq-C</b> RMP2(FC)/6-311+G(d,p)          | -312.346232 | -312.173880  | 1.146 | 10.7 |      | 1.81 |
| <b>ax-H</b> RMP2(FC)/6-311+G(d,p)          | -312.345146 | -312.172736  | 1.864 | 3.2  | 4.5  |      |
| <b>ax-C</b> RMP2(FC)/6-311+G(d,p)          | -312.344117 | -312.171266  | 2.787 | 0.7  |      |      |

# Cyclohexylbenzene

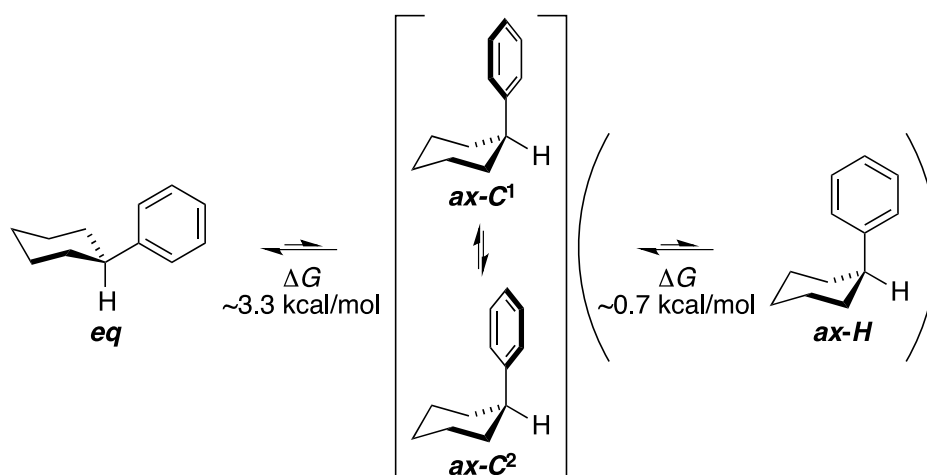

| geometry method          | $E$ (au)    | Thermal correction to Gibbs Free Energy (au/Particle) |  |  |  |
|--------------------------|-------------|-------------------------------------------------------|--|--|--|
| <b>eq</b> RHF/6-31G(d)   | -463.752980 | 0.233754                                              |  |  |  |
| <b>ax-C</b> RHF/6-31G(d) | -463.746037 | 0.234722                                              |  |  |  |
| <b>ax-H</b> RHF/6-31G(d) | -463.744797 | 0.233744                                              |  |  |  |

  

| energy method                        | $E$ (au)    | $G$ (au)    | rel $G$ (kcal/mol) | Population % | A-value (kcal/mol) |
|--------------------------------------|-------------|-------------|--------------------|--------------|--------------------|
| <b>eq</b> RωB97X-D/6-311+G(2df,2p)   | -466.925240 | -466.691486 | 0                  | 99.1         | 99.1               |
| <b>ax-C</b> RωB97X-D/6-311+G(2df,2p) | -466.920906 | -466.686184 | 3.327              | 0.4          | 2.79               |
| <b>ax-H</b> RωB97X-D/6-311+G(2df,2p) | -466.919243 | -466.685499 | 3.757              | 0.2          | 0.9                |

  

| energy method                        | $E$ (au)    | $G$ (au)    | rel $G$ (kcal/mol) | Population % | A-value (kcal/mol) |
|--------------------------------------|-------------|-------------|--------------------|--------------|--------------------|
| <b>eq</b> RM06-2X/6-311+G(2df,2p)    | -466.859231 | -466.625477 | 0                  | 99.1         | 99.1               |
| <b>ax-C</b> RM06-2X/6-311+G(2df,2p)  | -466.855037 | -466.620315 | 3.239              | 0.4          | 2.78               |
| <b>ax-H</b> RM06-2X /6-311+G(2df,2p) | -466.852388 | -466.618644 | 4.288              | 1.4,         | 0.9                |

  

| geometry method          | $E$ (au)    | Thermal correction to Gibbs Free Energy (au/Particle) |  |  |  |
|--------------------------|-------------|-------------------------------------------------------|--|--|--|
| <b>eq</b> RHF/6-31G(d)   | -463.752980 | 0.232781                                              |  |  |  |
| <b>ax-C</b> RHF/6-31G(d) | -463.746037 | 0.233805                                              |  |  |  |
| <b>ax-H</b> RHF/6-31G(d) | -463.744797 | 0.232757                                              |  |  |  |

  

| energy method                        | $E$ (au)    | $G$ (au)    | rel $G$ (kcal/mol) | Population % | A-value (kcal/mol) |
|--------------------------------------|-------------|-------------|--------------------|--------------|--------------------|
| <b>eq</b> RωB97X-V/6-311+G(2df,2p)   | -466.949464 | -466.716683 | 0                  | 99.4         | 99.4               |
| <b>ax-C</b> RωB97X-V/6-311+G(2df,2p) | -466.944911 | -466.711106 | 3.500              | 0.3          | 2.99               |
| <b>ax-H</b> RωB97X-V/6-311+G(2df,2p) | -466.942898 | -466.710141 | 4.105              | 0.1          | 0.6                |

  

| geometry method          | $E$ (au)    | Thermal correction to Gibbs Free Energy (au/Particle) |  |  |  |
|--------------------------|-------------|-------------------------------------------------------|--|--|--|
| <b>eq</b> RHF/6-31G(d)   | -463.752980 | 0.232781                                              |  |  |  |
| <b>ax-C</b> RHF/6-31G(d) | -463.746037 | 0.233805                                              |  |  |  |
| <b>ax-H</b> RHF/6-31G(d) | -463.744797 | 0.232757                                              |  |  |  |

|                             |             |          |
|-----------------------------|-------------|----------|
| <b>eq</b> RB3LYP/6-31G(d)   | -466.930334 | 0.216050 |
| <b>ax-C</b> RB3LYP/6-31G(d) | -466.924413 | 0.216918 |
| <b>ax-H</b> RB3LYP/6-31G(d) | -466.923330 | 0.216226 |

| energy method                                 | $E$ (au)    | $G$ (au)    | rel $G$ (kcal/mol) | Population % | A-value (kcal/mol) |
|-----------------------------------------------|-------------|-------------|--------------------|--------------|--------------------|
| <b>eq</b> RB3LYP-D3/6-311+G(2df,2p)           | -467.104036 | -466.887985 | 0                  | 99.5         | 99.5               |
| <b>ax-C</b> RB3LYP-D3/6-311+G(2df,2p)         | -467.099079 | -466.882161 | 3.654              | 0.2          | 3.11               |
| <b>ax-H</b> RB3LYP-D3/6-311+G(2df,2p)         | -467.097765 | -466.881539 | 4.045              | 0.1          | 0.5                |
| <b>eq</b> R $\omega$ B97X-D/6-311+G(2df,2p)   | -466.924617 | -466.708567 | 0                  | 99.0         | 99.0               |
| <b>ax-C</b> R $\omega$ B97X-D/6-311+G(2df,2p) | -466.920357 | -466.703440 | 3.217              | 0.4          | 2.71               |
| <b>ax-H</b> R $\omega$ B97X-D/6-311+G(2df,2p) | -466.918710 | -466.702484 | 3.817              | 0.2          | 1.0                |
| <b>eq</b> RM06-2X/6-311+G(2df,2p)             | -466.858709 | -466.642658 | 0                  | 98.9         | 98.9               |
| <b>ax-C</b> RM06-2X/6-311+G(2df,2p)           | -466.854633 | -466.637716 | 3.101              | 0.5          | 2.66               |
| <b>ax-H</b> RM06-2X /6-311+G(2df,2p)          | -466.851984 | -466.635758 | 4.330              | 0.06         | 1.1                |

| geometry method             | $E$ (au)    | Thermal correction to Gibbs Free Energy (au/Particle) |
|-----------------------------|-------------|-------------------------------------------------------|
| <b>eq</b> RB3LYP/6-31G(d)   | -466.930335 | 0.202451                                              |
| <b>ax-C</b> RB3LYP/6-31G(d) | -466.924415 | 0.203409                                              |
| <b>ax-H</b> RB3LYP/6-31G(d) | -466.923328 | 0.202545                                              |

| energy method                                 | $E$ (au)    | $G$ (au)    | rel $G$ (kcal/mol) | Population % | A-value (kcal/mol) |
|-----------------------------------------------|-------------|-------------|--------------------|--------------|--------------------|
| <b>eq</b> R $\omega$ B97X-V/6-311+G(2df,2p)   | -466.950076 | -466.747625 | 0                  | 99.4         | 99.4               |
| <b>ax-C</b> R $\omega$ B97X-V/6-311+G(2df,2p) | -466.945634 | -466.742225 | 3.389              | 0.3          | 2.90               |
| <b>ax-H</b> R $\omega$ B97X-V/6-311+G(2df,2p) | -466.943603 | -466.741058 | 4.121              | 0.09         | 0.6                |

| geometry method                | $E$ (au)    | Thermal correction to Gibbs Free Energy (au/Particle) |
|--------------------------------|-------------|-------------------------------------------------------|
| <b>eq</b> RB3LYP-D3/6-31G(d)   | -466.954824 | 0.216841                                              |
| <b>ax-C</b> RB3LYP-D3/6-31G(d) | -466.950213 | 0.217536                                              |
| <b>ax-H</b> RB3LYP-D3/6-31G(d) | -466.948780 | 0.216560                                              |

| energy method                        | $E$ (au)    | $G$ (au)    | rel $G$ (kcal/mol) | Population % | A-value (kcal/mol) |
|--------------------------------------|-------------|-------------|--------------------|--------------|--------------------|
| <b>eq</b> RM06-2X/6-311+G(2df,2p)    | -466.858904 | -466.642063 | 0                  | 98.5         | 98.5               |
| <b>ax-C</b> RM06-2X/6-311+G(2df,2p)  | -466.854920 | -466.637384 | 2.936              | 0.7          | 2.48               |
| <b>ax-H</b> RM06-2X /6-311+G(2df,2p) | -466.852206 | -466.635646 | 4.027              | 0.1          | 1.5                |

| geometry method                        | $E$ (au)    | Thermal correction to Gibbs Free Energy (au/Particle) |  |
|----------------------------------------|-------------|-------------------------------------------------------|--|
| <b>eq</b> R $\omega$ B97X-D/6-31G(d)   | -466.788558 | 0.219132                                              |  |
| <b>ax-C</b> R $\omega$ B97X-D/6-31G(d) | -466.784477 | 0.219916                                              |  |
| <b>ax-H</b> R $\omega$ B97X-D/6-31G(d) | -466.782743 | 0.219386                                              |  |

| energy method                                 | $E$ (au)    | $G$ (au)    | rel $G$ (kcal/mol) | Population % | A-value (kcal/mol) |
|-----------------------------------------------|-------------|-------------|--------------------|--------------|--------------------|
| <b>eq</b> R $\omega$ B97X-D/6-311+G(2df,2p)   | -466.925424 | -466.706292 | 0                  | 98.8         | 98.8               |
| <b>ax-C</b> R $\omega$ B97X-D/6-311+G(2df,2p) | -466.921208 | -466.701292 | 3.138              | 0.5          | 2.59               |
| <b>ax-H</b> R $\omega$ B97X-D/6-311+G(2df,2p) | -466.920089 | -466.700704 | 3.507              | 0.2          | 1.2                |
| <b>eq</b> RM06-2X/6-311+G(2df,2p)             | -466.859541 | -466.640409 | 0                  | 98.6         | 98.6               |
| <b>ax-C</b> RM06-2X/6-311+G(2df,2p)           | -466.855596 | -466.635680 | 2.967              | 0.6          | 2.53               |
| <b>ax-H</b> RM06-2X /6-311+G(2df,2p)          | -466.852820 | -466.633434 | 4.377              | 0.06         | 1.4                |

| geometry method                      | $E$ (au)    | Thermal correction to Gibbs Free Energy (au/Particle) |  |
|--------------------------------------|-------------|-------------------------------------------------------|--|
| <b>eq</b> R $\omega$ B97X-D/6-31G*   | -466.788559 | 0.202778                                              |  |
| <b>ax-C</b> R $\omega$ B97X-D/6-31G* | -466.784480 | 0.203927                                              |  |
| <b>ax-H</b> R $\omega$ B97X-D/6-31G* | -466.782730 | 0.205904                                              |  |

| energy method                                 | $E$ (au)    | $G$ (au)    | rel $G$ (kcal/mol) | Population % | A-value (kcal/mol) |
|-----------------------------------------------|-------------|-------------|--------------------|--------------|--------------------|
| <b>eq</b> R $\omega$ B97X-V/6-311+G(2df,2p)   | -466.950578 | -466.747800 | 0                  | 99.4         | 99.4               |
| <b>ax-C</b> R $\omega$ B97X-V/6-311+G(2df,2p) | -466.946225 | -466.742298 | 3.453              | 0.3          | 3.04               |
| <b>ax-H</b> R $\omega$ B97X-V/6-311+G(2df,2p) | -466.944091 | -466.738187 | 6.032              | 0.004        | 0.6                |

| geometry method              | $E$ (au)    | Thermal correction to Gibbs Free Energy (au/Particle) |  |
|------------------------------|-------------|-------------------------------------------------------|--|
| <b>eq</b> RM06-2X/6-31G(d)   | -466.708648 | 0.218689                                              |  |
| <b>ax-C</b> RM06-2X/6-31G(d) | -466.704894 | 0.219553                                              |  |

| energy method                        | $E$ (au)    | $G$ (au)    | rel $G$ (kcal/mol) | Population % | A-value (kcal/mol) |
|--------------------------------------|-------------|-------------|--------------------|--------------|--------------------|
| <b>eq</b> RM06-2X/6-311+G(2df,2p)    | -466.859607 | -466.640918 | 0                  | 98.8         | 98.8               |
| <b>ax-C</b> RM06-2X /6-311+G(2df,2p) | -466.855682 | -466.636129 | 3.005              | 0.6          | 2.60               |

| geometry method                      | $E$ (au)    | Thermal correction to Gibbs Free Energy (au/Particle) |  |
|--------------------------------------|-------------|-------------------------------------------------------|--|
| <b>eq</b> R $\omega$ B97X-V/6-31G*   | -466.811130 | 0.218374                                              |  |
| <b>ax-C</b> R $\omega$ B97X-V/6-31G* | -466.807065 | 0.219446                                              |  |

| energy method | $E$ (au) | $G$ (au) | rel $G$ (kcal/mol) | Population % | A-value (kcal/mol) |
|---------------|----------|----------|--------------------|--------------|--------------------|
|---------------|----------|----------|--------------------|--------------|--------------------|

| <b>eq</b> RM06-2X/6-311+G(2df,2p)             | -466.860105   | -466.641731                                           | 0                       | 99.0         | 99.0               |      |
|-----------------------------------------------|---------------|-------------------------------------------------------|-------------------------|--------------|--------------------|------|
| <b>ax-C</b> RM06-2X /6-311+G(2df,2p)          | -466.856152   | -466.636706                                           | 3.153                   | 0.5          | 1.0                | 2.74 |
| <b>eq</b> R $\omega$ B97X-V/6-311+G(2df,2p)   | -466.950307   | -466.731933                                           | 0                       | 99.4         | 99.4               |      |
| <b>ax-C</b> R $\omega$ B97X-V/6-311+G(2df,2p) | -466.945945   | -466.726499                                           | 3.410                   | 0.3          | 0.6                | 3.00 |
| geometry method                               | <i>E</i> (au) | Thermal correction to Gibbs Free Energy (au/Particle) |                         |              |                    |      |
| <b>eq</b> RMP2(FC)/6-31G(d)                   | -465.297337   | 0.219212                                              |                         |              |                    |      |
| <b>ax-C</b> RMP2(FC)/6-31G(d)                 | -465.292752   | 0.220248                                              |                         |              |                    |      |
| <b>ax-H</b> RMP2(FC)/6-31G(d)                 | -465.290732   | 0.219172                                              |                         |              |                    |      |
| energy method                                 | <i>E</i> (au) | <i>G</i> (au)                                         | rel <i>G</i> (kcal/mol) | Population % | A-value (kcal/mol) |      |
| <b>eq</b> RM06-2X/6-311+G(2df,2p)             | -466.859262   | -466.640050                                           | 0                       | 99.0         | 99.0               |      |
| <b>ax-C</b> RM06-2X/6-311+G(2df,2p)           | -466.855255   | -466.635007                                           | 3.164                   | 0.5          |                    | 2.71 |
| <b>ax-H</b> RM06-2X /6-311+G(2df,2p)          | -466.852523   | -466.633351                                           | 4.203                   | 0.08         | 1.0                |      |
| <b>eq</b> RMP2(FC)/6-311+G(2df,2p)            | -465.844075   | -465.624862                                           | 0                       | 98.9         | 98.9               |      |
| <b>ax-C</b> RMP2(FC)/6-311+G(2df,2p)          | -465.840130   | -465.619883                                           | 3.124                   | 0.5          |                    | 2.65 |
| <b>ax-H</b> RMP2(FC)/6-311+G(2df,2p)          | -465.837672   | -465.618500                                           | 3.992                   | 0.1          | 1.1                |      |
| geometry method                               | <i>E</i> (au) | Thermal correction to Gibbs Free Energy (au/Particle) |                         |              |                    |      |
| <b>eq</b> RMP2(FC)/6-31G*                     | -465.297337   | 0.218429                                              |                         |              |                    |      |
| <b>ax-C</b> RMP2(FC)/6-31G*                   | -465.292752   | 0.219643                                              |                         |              |                    |      |
| <b>ax-H</b> RMP2(FC)/6-31G*                   | -465.290732   | 0.218866                                              |                         |              |                    |      |
| energy method                                 | <i>E</i> (au) | <i>G</i> (au)                                         | rel <i>G</i> (kcal/mol) | Population % | A-value (kcal/mol) |      |
| <b>eq</b> R $\omega$ B97X-V/6-311+G(2df,2p)   | -466.950366   | -466.731937                                           | 0                       | 99.5         | 99.5               |      |
| <b>ax-C</b> R $\omega$ B97X-V/6-311+G(2df,2p) | -466.945900   | -466.726257                                           | 3.564                   | 0.2          |                    | 3.08 |
| <b>ax-H</b> R $\omega$ B97X-V/6-311+G(2df,2p) | -466.943848   | -466.724982                                           | 4.364                   | 0.06         | 0.5                |      |
| geometry method                               | <i>E</i> (au) | <i>G</i> (au)                                         | rel <i>G</i> (kcal/mol) | Population % | A-value (kcal/mol) |      |
| <b>eq</b> RHF/6-311+G(d,p)                    | -463.859050   | -463.628528                                           | 0                       | 100.0        | 100.0              |      |
| <b>ax-C</b> RHF/6-311+G(d,p)                  | -463.851875   | -463.620354                                           | 5.129                   | 0.02         |                    | 4.53 |
| <b>ax-H</b> RHF/6-311+G(d,p)                  | -463.850801   | -463.620114                                           | 5.280                   | 0.01         | 0.01               |      |
| <b>eq</b> RB3LYP/6-311+G(d,p)                 | -467.051575   | -466.837822                                           | 0                       | 99.8         | 99.8               |      |
| <b>ax-C</b> RB3LYP/6-311+G(d,p)               | -467.045427   | -466.830859                                           | 4.369                   | 0.1          |                    | 3.76 |
| <b>ax-H</b> RB3LYP/6-311+G(d,p)               | -467.044504   | -466.830664                                           | 4.492                   | 0.05         | 0.2                |      |



|                                            |             |             |       |      |      |      |
|--------------------------------------------|-------------|-------------|-------|------|------|------|
| <b>eq</b> RB3LYP-D3/6-311+G(d,p)           | -467.076060 | -466.861491 | 0     | 99.2 | 99.2 |      |
| <b>ax-C</b> RB3LYP-D3/6-311+G(d,p)         | -467.071200 | -466.856013 | 3.437 | 0.3  |      | 2.82 |
| <b>ax-H</b> RB3LYP-D3/6-311+G(d,p)         | -467.069942 | -466.855852 | 3.538 | 0.2  | 0.8  |      |
| <b>eq</b> R $\omega$ B97X-D/6-311+G(d,p)   | -466.899383 | -466.682620 | 0     | 98.7 | 98.7 |      |
| <b>ax-C</b> R $\omega$ B97X-D/6-311+G(d,p) | -466.895235 | -466.677788 | 3.032 | 0.6  |      | 2.55 |
| <b>ax-H</b> R $\omega$ B97X-D/6-311+G(d,p) | -466.893638 | -466.676566 | 3.799 | 0.2  | 1.3  |      |
| <b>eq</b> RM06-2X/6-311+G(d,p)             | -466.831406 | -466.614651 | 0     | 98.8 | 98.8 |      |
| <b>ax-C</b> RM06-2X/6-311+G(d,p)           | -466.827497 | -466.609851 | 3.012 | 0.6  | 1.2  | 2.60 |
| <b>eq</b> R $\omega$ B97X-V/6-311+G**      | -466.925568 | -466.710092 | 0     | 99.3 | 99.3 |      |
| <b>ax-C</b> R $\omega$ B97X-V/6-311+G**    | -466.921319 | -466.704795 | 3.324 | 0.4  | 0.7  | 2.91 |
| <b>eq</b> RMP2(FC)/6-311+G(d,p)            | -465.587367 | -465.372337 | 0     | 99.3 | 99.3 |      |
| <b>ax-C</b> RMP2(FC)/6-311+G(d,p)          | -465.582813 | -465.366917 | 3.401 | 0.3  |      | 2.90 |
| <b>ax-H</b> RMP2(FC)/6-311+G(d,p)          | -465.580860 | -465.365840 | 4.077 | 0.1  | 0.7  |      |

### 1-Cyclohexylethanone

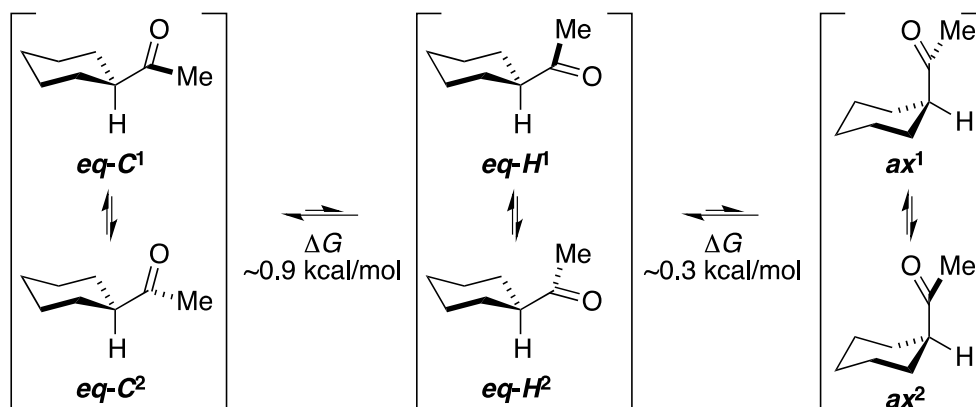

| geometry method                               | $E$ (au)    | Thermal correction to Gibbs Free Energy (au/Particle) |                    |              |                    |
|-----------------------------------------------|-------------|-------------------------------------------------------|--------------------|--------------|--------------------|
| <b>eq-C</b> RHF/6-31G(d)                      | -385.976158 | 0.188521                                              |                    |              |                    |
| <b>eq-H</b> RHF/6-31G(d)                      | -385.973923 | 0.188929                                              |                    |              |                    |
| <b>ax</b> RHF/6-31G(d)                        | -385.973768 | 0.189513                                              |                    |              |                    |
| energy method                                 | $E$ (au)    | $G$ (au)                                              | rel $G$ (kcal/mol) | Population % | A-value (kcal/mol) |
| <b>eq-C</b> R $\omega$ B97X-D/6-311+G(2df,2p) | -388.530013 | -388.341491                                           | 0                  | 36.0         |                    |
| <b>eq-H</b> R $\omega$ B97X-D/6-311+G(2df,2p) | -388.529158 | -388.340230                                           | 0.7915             | 9.4          | 90.9               |
| <b>ax</b> R $\omega$ B97X-D/6-311+G(2df,2p)   | -388.529062 | -388.339549                                           | 1.219              | 4.6          | 9.1                |

|                                       |               |                                                       |                         |              |                    |      |
|---------------------------------------|---------------|-------------------------------------------------------|-------------------------|--------------|--------------------|------|
| <b>eq-C</b> RM06-2X/6-311+G(2df,2p)   | -388.468269   | -388.279748                                           | 0                       | 36.3         |                    |      |
| <b>eq-H</b> RM06-2X /6-311+G(2df,2p)  | -388.467315   | -388.278386                                           | 0.854                   | 8.5          | 89.7               | 1.28 |
| <b>ax</b> RM06-2X/6-311+G(2df,2p)     | -388.467423   | -388.277910                                           | 1.153                   | 5.2          | 10.3               |      |
| geometry method                       | <i>E</i> (au) | Thermal correction to Gibbs Free Energy (au/Particle) |                         |              |                    |      |
| <b>eq-C</b> RHF/6-31G*                | -385.976158   | 0.187570                                              |                         |              |                    |      |
| <b>eq-H</b> RHF/6-31G*                | -385.973923   | 0.188023                                              |                         |              |                    |      |
| <b>ax</b> RHF/6-31G*                  | -385.973768   | 0.188640                                              |                         |              |                    |      |
| energy method                         | <i>E</i> (au) | <i>G</i> (au)                                         | rel <i>G</i> (kcal/mol) | Population % | A-value (kcal/mol) |      |
| <b>eq-C</b> RωB97X-V/6-311+G(2df,2p)  | -388.545331   | -388.357761                                           | 0                       | 38.7         |                    |      |
| <b>eq-H</b> RωB97X-V/6-311+G(2df,2p)  | -388.544305   | -388.356282                                           | 0.928                   | 8.0          | 93.5               | 1.57 |
| <b>ax</b> RωB97X-V/6-311+G(2df,2p)    | -388.544073   | -388.355433                                           | 1.461                   | 3.3          | 6.5                |      |
| geometry method                       | <i>E</i> (au) | Thermal correction to Gibbs Free Energy (au/Particle) |                         |              |                    |      |
| <b>eq-C</b> RB3LYP/6-31G(d)           | -388.520270   | 0.173597                                              |                         |              |                    |      |
| <b>eq-H</b> RB3LYP/6-31G(d)           | -388.518052   | 0.173979                                              |                         |              |                    |      |
| <b>ax</b> RB3LYP/6-31G(d)             | -388.518132   | 0.174534                                              |                         |              |                    |      |
| energy method                         | <i>E</i> (au) | <i>G</i> (au)                                         | rel <i>G</i> (kcal/mol) | Population % | A-value (kcal/mol) |      |
| <b>eq-C</b> RB3LYP-D3/6-311+G(2df,2p) | -388.674861   | -388.501265                                           | 0                       | 37.5         |                    |      |
| <b>eq-H</b> RB3LYP-D3/6-311+G(2df,2p) | -388.674005   | -388.500027                                           | 0.777                   | 10.1         | 95.1               | 1.76 |
| <b>ax</b> RB3LYP-D3/6-311+G(2df,2p)   | -388.673221   | -388.498687                                           | 1.617                   | 2.4          | 4.9                |      |
| <b>eq-C</b> RωB97X-D/6-311+G(2df,2p)  | -388.532628   | -388.359031                                           | 0                       | 33.4         |                    |      |
| <b>eq-H</b> RωB97X-D/6-311+G(2df,2p)  | -388.532122   | -388.358143                                           | 0.557                   | 13.0         | 92.7               | 1.50 |
| <b>ax</b> RωB97X-D/6-311+G(2df,2p)    | -388.531480   | -388.356946                                           | 1.309                   | 3.6          | 7.3                |      |
| <b>eq-C</b> RM06-2X/6-311+G(2df,2p)   | -388.467932   | -388.294336                                           | 0                       | 34.7         |                    |      |
| <b>eq-H</b> RM06-2X /6-311+G(2df,2p)  | -388.467084   | -388.293105                                           | 0.772                   | 9.4          | 88.2               | 1.19 |
| <b>ax</b> RM06-2X/6-311+G(2df,2p)     | -388.467200   | -388.292666                                           | 1.048                   | 5.9          | 11.8               |      |
| geometry method                       | <i>E</i> (au) | Thermal correction to Gibbs Free Energy (au/Particle) |                         |              |                    |      |
| <b>eq-C</b> RB3LYP/6-31G*             | -388.520279   | 0.162288                                              |                         |              |                    |      |
| <b>eq-H</b> RB3LYP/6-31G*             | -388.518063   | 0.162628                                              |                         |              |                    |      |
| <b>ax</b> RB3LYP/6-31G*               | -388.518132   | 0.163184                                              |                         |              |                    |      |
| energy method                         | <i>E</i> (au) | <i>G</i> (au)                                         | rel <i>G</i> (kcal/mol) | Population % | A-value (kcal/mol) |      |

|                                               |             |             |       |      |      |      |
|-----------------------------------------------|-------------|-------------|-------|------|------|------|
| <b>eq-C</b> R $\omega$ B97X-V/6-311+G(2df,2p) | -388.546228 | -388.383940 | 0     | 36.7 | 92.0 |      |
| <b>eq-H</b> R $\omega$ B97X-V/6-311+G(2df,2p) | -388.545274 | -388.382646 | 0.812 | 9.3  |      | 1.44 |
| <b>ax</b> R $\omega$ B97X-V/6-311+G(2df,2p)   | -388.545038 | -388.381854 | 1.309 | 4.0  | 8.0  |      |

| geometry method                | $E$ (au)    | Thermal correction to Gibbs Free Energy (au/Particle) |  |
|--------------------------------|-------------|-------------------------------------------------------|--|
| <b>eq-C</b> RB3LYP-D3/6-31G(d) | -388.540456 | 0.174460                                              |  |
| <b>eq-H</b> RB3LYP-D3/6-31G(d) | -388.538629 | 0.174938                                              |  |
| <b>ax</b> RB3LYP-D3/6-31G(d)   | -388.539641 | 0.175603                                              |  |

| energy method                        | $E$ (au)    | $G$ (au)    | rel $G$ (kcal/mol) | Population % | A-value (kcal/mol) |
|--------------------------------------|-------------|-------------|--------------------|--------------|--------------------|
| <b>eq-C</b> RM06-2X/6-311+G(2df,2p)  | -388.468182 | -388.293721 | 0                  | 35.3         | 88.5               |
| <b>eq-H</b> RM06-2X /6-311+G(2df,2p) | -388.467373 | -388.292435 | 0.807              | 9.0          | 1.21               |
| <b>ax</b> RM06-2X/6-311+G(2df,2p)    | -388.467615 | -388.292012 | 1.073              | 5.7          | 11.5               |

| geometry method                        | $E$ (au)    | Thermal correction to Gibbs Free Energy (au/Particle) |  |
|----------------------------------------|-------------|-------------------------------------------------------|--|
| <b>eq-C</b> R $\omega$ B97X-D/6-31G(d) | -388.409026 | 0.176113                                              |  |
| <b>eq-H</b> R $\omega$ B97X-D/6-31G(d) | -388.407701 | 0.176537                                              |  |
| <b>ax</b> R $\omega$ B97X-D/6-31G(d)   | -388.408639 | 0.177447                                              |  |

| energy method                                 | $E$ (au)    | $G$ (au)    | rel $G$ (kcal/mol) | Population % | A-value (kcal/mol) |
|-----------------------------------------------|-------------|-------------|--------------------|--------------|--------------------|
| <b>eq-C</b> R $\omega$ B97X-D/6-311+G(2df,2p) | -388.533325 | -388.357213 | 0                  | 34.5         | 94.7               |
| <b>eq-H</b> R $\omega$ B97X-D/6-311+G(2df,2p) | -388.532822 | -388.356286 | 0.582              | 12.9         | 1.70               |
| <b>ax</b> R $\omega$ B97X-D/6-311+G(2df,2p)   | -388.532253 | -388.354807 | 1.510              | 2.7          | 5.3                |
| <b>eq-C</b> RM06-2X/6-311+G(2df,2p)           | -388.468748 | -388.292635 | 0                  | 35.7         | 90.2               |
| <b>eq-H</b> RM06-2X /6-311+G(2df,2p)          | -388.467923 | -388.291386 | 0.784              | 9.5          | 1.31               |
| <b>ax</b> RM06-2X/6-311+G(2df,2p)             | -388.468208 | -388.290762 | 1.175              | 4.9          | 9.8                |

| wgeometry method                     | $E$ (au)    | Thermal correction to Gibbs Free Energy (au/Particle) |  |
|--------------------------------------|-------------|-------------------------------------------------------|--|
| <b>eq-C</b> R $\omega$ B97X-D/6-31G* | -388.409041 | 0.162480                                              |  |
| <b>eq-H</b> R $\omega$ B97X-D/6-31G* | -388.407713 | 0.163071                                              |  |
| <b>ax</b> R $\omega$ B97X-D/6-31G*   | -388.408633 | 0.163718                                              |  |

| energy method                                 | $E$ (au)    | $G$ (au)    | rel $G$ (kcal/mol) | Population % | A-value (kcal/mol) |
|-----------------------------------------------|-------------|-------------|--------------------|--------------|--------------------|
| <b>eq-C</b> R $\omega$ B97X-V/6-311+G(2df,2p) | -388.546700 | -388.384220 | 0                  | 38.9         | 93.4               |
| <b>eq-H</b> R $\omega$ B97X-V/6-311+G(2df,2p) | -388.545774 | -388.382703 | 0.952              | 7.8          | 1.56               |

**ax** RωB97X-V/6-311+G(2df,2p) -388.545618 -388.381900 1.456 3.3 6.6

| geometry method              | <i>E</i> (au) | Thermal correction to Gibbs Free Energy (au/Particle) |  |  |  |
|------------------------------|---------------|-------------------------------------------------------|--|--|--|
| <b>eq-C</b> RM06-2X/6-31G(d) | -388.333156   | 0.175972                                              |  |  |  |
| <b>eq-H</b> RM06-2X/6-31G(d) | -388.331496   | 0.176220                                              |  |  |  |
| <b>ax</b> RM06-2X/6-31G(d)   | -388.333340   | 0.177358                                              |  |  |  |

| energy method                        | <i>E</i> (au) | <i>G</i> (au) | rel <i>G</i> (kcal/mol) | Population % | A-value (kcal/mol) |
|--------------------------------------|---------------|---------------|-------------------------|--------------|--------------------|
| <b>eq-C</b> RM06-2X/6-311+G(2df,2p)  | -388.468869   | -388.292897   | 0                       | 34.3         | 91.0               |
| <b>eq-H</b> RM06-2X /6-311+G(2df,2p) | -388.468066   | -388.291846   | 0.660                   | 11.2         |                    |
| <b>ax</b> RM06-2X/6-311+G(2df,2p)    | -388.468346   | -388.290988   | 1.198                   | 4.5          | 9.0                |

| geometry method             | <i>E</i> (au) | Thermal correction to Gibbs Free Energy (au/Particle) |  |  |  |
|-----------------------------|---------------|-------------------------------------------------------|--|--|--|
| <b>eq-C</b> RωB97X-V/6-31G* | -388.418294   | 0.175337                                              |  |  |  |
| <b>eq-H</b> RωB97X-V/6-31G* | -388.416451   | 0.175817                                              |  |  |  |
| <b>ax</b> RωB97X-V/6-31G*   | -388.418115   | 0.176716                                              |  |  |  |

| energy method                        | <i>E</i> (au) | <i>G</i> (au) | rel <i>G</i> (kcal/mol) | Population % | A-value (kcal/mol) |
|--------------------------------------|---------------|---------------|-------------------------|--------------|--------------------|
| <b>eq-C</b> RM06-2X/6-311+G(2df,2p)  | -388.470246   | -388.294909   | 0                       | 36.6         | 91.5               |
| <b>eq-H</b> RM06-2X /6-311+G(2df,2p) | -388.469417   | -388.293600   | 0.821                   | 9.1          |                    |
| <b>ax</b> RM06-2X/6-311+G(2df,2p)    | -388.469593   | -388.292877   | 1.275                   | 4.2          | 8.5                |
| <b>eq-C</b> RωB97X-V/6-311+G(2df,2p) | -388.546472   | -388.371135   | 0                       | 38.5         | 94.6               |
| <b>eq-H</b> RωB97X-V/6-311+G(2df,2p) | -388.545566   | -388.369749   | 0.870                   | 8.8          |                    |
| <b>ax</b> RωB97X-V/6-311+G(2df,2p)   | -388.545355   | -388.368639   | 1.566                   | 2.7          | 5.4                |

| geometry method               | <i>E</i> (au) | Thermal correction to Gibbs Free Energy (au/Particle) |  |  |  |
|-------------------------------|---------------|-------------------------------------------------------|--|--|--|
| <b>eq-C</b> RMP2(FC)/6-31G(d) | -387.191073   | 0.178156                                              |  |  |  |
| <b>eq-H</b> RMP2(FC)/6-31G(d) | -387.189048   | 0.178635                                              |  |  |  |
| <b>ax</b> RMP2(FC)/6-31G(d)   | -387.190510   | 0.179456                                              |  |  |  |

| energy method                        | <i>E</i> (au) | <i>G</i> (au) | rel <i>G</i> (kcal/mol) | Population % | A-value (kcal/mol) |
|--------------------------------------|---------------|---------------|-------------------------|--------------|--------------------|
| <b>eq-C</b> RM06-2X/6-311+G(2df,2p)  | -388.468123   | -388.289967   | 0                       | 35.7         | 90.5               |
| <b>eq-H</b> RM06-2X /6-311+G(2df,2p) | -388.467366   | -388.288731   | 0.776                   | 9.6          |                    |
| <b>ax</b> RM06-2X/6-311+G(2df,2p)    | -388.467522   | -388.288066   | 1.193                   | 4.7          | 9.5                |
| <b>eq-C</b> RMP2(FC)/6-311+G(2df,2p) | -387.667214   | -387.879058   | 0                       | 37.9         | 93.7               |
| <b>eq-H</b> RMP2(FC)/6-311+G(2df,2p) | -387.666327   | -387.487692   | 0.857                   | 8.9          |                    |

| <b>ax</b> RMP2(FC)/6-311+G(2df,2p)   | -387.666175   | -387.486719                                           | 1.468                   | 3.2          | 6.3                |  |
|--------------------------------------|---------------|-------------------------------------------------------|-------------------------|--------------|--------------------|--|
| geometry method                      | <i>E</i> (au) | Thermal correction to Gibbs Free Energy (au/Particle) |                         |              |                    |  |
| <b>eq-C</b> RMP2(FC)/6-31G*          | -387.191073   | 0.176986                                              |                         |              |                    |  |
| <b>eq-H</b> RMP2(FC)/6-31G*          | -387.189048   | 0.177706                                              |                         |              |                    |  |
| <b>ax</b> RMP2(FC)/6-31G*            | -387.190510   | 0.178629                                              |                         |              |                    |  |
| energy method                        | <i>E</i> (au) | <i>G</i> (au)                                         | rel <i>G</i> (kcal/mol) | Population % | A-value (kcal/mol) |  |
| <b>eq-C</b> RωB97X-V/6-311+G(2df,2p) | -388.546331   | -388.369345                                           | 0                       | 40.5         | 96.2               |  |
| <b>eq-H</b> RωB97X-V/6-311+G(2df,2p) | -388.545473   | -388.367767                                           | 0.990                   | 7.6          | 1.90               |  |
| <b>ax</b> RωB97X-V/6-311+G(2df,2p)   | -388.545102   | -388.366473                                           | 1.802                   | 1.9          | 3.8                |  |
| geometry method                      | <i>E</i> (au) | <i>G</i> (au)                                         | rel <i>G</i> (kcal/mol) | Population % | A-value (kcal/mol) |  |
| <b>eq-C</b> RHF/6-311+G(d,p)         | -386.076651   | -385.890709                                           | 0                       | 42.4         | 98.8               |  |
| <b>eq-H</b> RHF/6-311+G(d,p)         | -386.075208   | -385.889016                                           | 1.062                   | 7.0          | 2.61               |  |
| <b>ax</b> RHF/6-311+G(d,p)           | -386.073555   | -385.886695                                           | 2.519                   | 0.6          | 1.2                |  |
| <b>eq-C</b> RB3LYP/6-311+G(d,p)      | -388.633563   | -388.461916                                           | 0                       | 40.3         | 98.2               |  |
| <b>eq-H</b> RB3LYP/6-311+G(d,p)      | -388.632343   | -388.460486                                           | 0.897                   | 8.8          | 2.36               |  |
| <b>ax</b> RB3LYP/6-311+G(d,p)        | -388.630809   | -388.458346                                           | 2.240                   | 0.9          | 1.8                |  |
| <b>eq-C</b> RB3LYP-D3/6-311+G(d,p)   | -388.653763   | -388.481248                                           | 0                       | 35.3         | 95.3               |  |
| <b>eq-H</b> RB3LYP-D3/6-311+G(d,p)   | -388.652936   | -388.480257                                           | 0.622                   | 12.3         | 1.78               |  |
| <b>ax</b> RB3LYP-D3/6-311+G(d,p)     | -388.652294   | -388.478690                                           | 1.605                   | 2.3          | 4.7                |  |
| <b>eq-C</b> RωB97X-D/6-311+G(d,p)    | -388.513106   | -388.338934                                           | 0                       | 31.6         | 92.6               |  |
| <b>eq-H</b> RωB97X-D/6-311+G(d,p)    | -388.512641   | -388.338219                                           | 0.449                   | 14.8         | 1.50               |  |
| <b>ax</b> RωB97X-D/6-311+G(d,p)      | -388.512218   | -388.336911                                           | 1.269                   | 3.7          | 7.4                |  |
| <b>eq-C</b> RM06-2X/6-311+G(d,p)     | -388.447733   | -388.273365                                           | 0                       | 33.2         | 88.7               |  |
| <b>eq-H</b> RM06-2X/6-311+G(d,p)     | -388.446969   | -388.272344                                           | 0.641                   | 11.2         | 1.22               |  |
| <b>ax</b> RM06-2X/6-311+G(d,p)       | -388.447384   | -388.271698                                           | 1.046                   | 5.6          | 11.3               |  |
| <b>eq-C</b> RωB97X-V/6-311+G**       | -388.527406   | -388.354660                                           | 0                       | 38.8         | 93.8               |  |
| <b>eq-H</b> RωB97X-V/6-311+G**       | -388.526521   | -388.353179                                           | 0.929                   | 8.1          | 1.61               |  |
| <b>ax</b> RωB97X-V/6-311+G**         | -388.526449   | -388.352279                                           | 1.494                   | 3.1          | 6.2                |  |
| <b>eq-C</b> RMP2(FC)/6-311+G(d,p)    | -387.456941   | -387.282320                                           | 0                       | 38.2         | 95.2               |  |
| <b>eq-H</b> RMP2(FC)/6-311+G(d,p)    | -387.456094   | -387.281004                                           | 0.826                   | 9.4          | 1.76               |  |

## Methoxycyclohexane

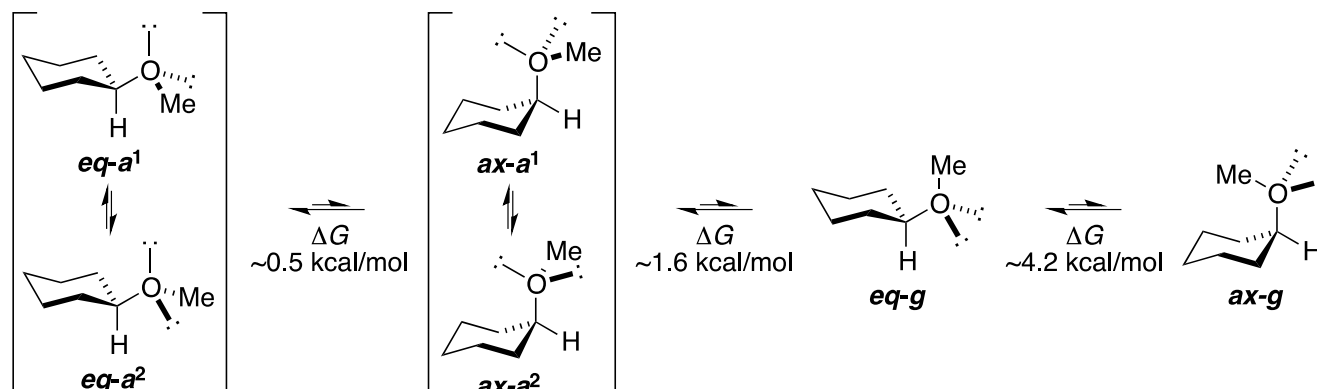

| geometry method          | $E$ (au)    | Thermal correction to Gibbs Free Energy (au/Particle) |
|--------------------------|-------------|-------------------------------------------------------|
| <b>eq-a</b> RHF/6-31G(d) | -348.086252 | 0.185354                                              |
| <b>eq-g</b> RHF/6-31G(d) | -348.081857 | 0.186885                                              |
| <b>ax-a</b> RHF/6-31G(d) | -348.085905 | 0.185686                                              |
| <b>ax-g</b> RHF/6-31G(d) | -348.073645 | 0.185972                                              |

| energy method                        | $E$ (au)    | $G$ (au)    | rel $G$ (kcal/mol) | Population % | A-value (kcal/mol) |
|--------------------------------------|-------------|-------------|--------------------|--------------|--------------------|
| <b>eq-a</b> Rwb97X-D/6-311+G(2df,2p) | -350.409321 | -350.223966 | 0                  | 38.5         | 77.5               |
| <b>eq-g</b> Rwb97X-D/6-311+G(2df,2p) | -350.406579 | -350.219694 | 2.681              | 0.4          |                    |
| <b>ax-a</b> Rwb97X-D/6-311+G(2df,2p) | -350.408493 | -350.222807 | 0.728              | 11.2         | 22.5               |
| <b>ax-g</b> Rwb97X-D/6-311+G(2df,2p) | -350.400323 | -350.214351 | 6.033              | 0.001        |                    |
| <b>eq-a</b> RM06-2X/6-311+G(2df,2p)  | -350.348030 | -350.162675 | 0                  | 35.7         | 71.8               |
| <b>eq-g</b> RM06-2X /6-311+G(2df,2p) | -350.345186 | -350.158302 | 2.745              | 0.3          |                    |
| <b>ax-a</b> RM06-2X/6-311+G(2df,2p)  | -350.347485 | -350.161799 | 0.550              | 14.1         | 28.2               |
| <b>ax-g</b> RM06-2X /6-311+G(2df,2p) | -350.338236 | -350.152264 | 6.533              | 0.0006       |                    |

| geometry method        | $E$ (au)    | Thermal correction to Gibbs Free Energy (au/Particle) |
|------------------------|-------------|-------------------------------------------------------|
| <b>eq-a</b> RHF/6-31G* | -348.086251 | 0.184678                                              |
| <b>eq-g</b> RHF/6-31G* | -348.081857 | 0.187045                                              |
| <b>ax-a</b> RHF/6-31G* | -348.085905 | 0.184981                                              |
| <b>ax-g</b> RHF/6-31G* | -348.073644 | 0.185297                                              |

| energy method                                 | $E$ (au)    | $G$ (au)                                              | rel $G$ (kcal/mol) | Population % | A-value (kcal/mol)   |      |
|-----------------------------------------------|-------------|-------------------------------------------------------|--------------------|--------------|----------------------|------|
| <b>eq-a</b> R <b>w</b> B97X-V/6-311+G(2df,2p) | -350.417838 | -350.233160                                           | 0                  | 36.0         | 72.2<br>0.56<br>27.8 |      |
| <b>eq-g</b> R <b>w</b> B97X-V/6-311+G(2df,2p) | -350.414666 | -350.227621                                           | 3.476              | 0.1          |                      |      |
| <b>ax-a</b> R <b>w</b> B97X-V/6-311+G(2df,2p) | -350.417245 | -350.232264                                           | 0.562              | 13.9         |                      |      |
| <b>ax-g</b> R <b>w</b> B97X-V/6-311+G(2df,2p) | -350.407866 | -350.222569                                           | 6.646              | 0.0005       |                      |      |
| geometry method                               | $E$ (au)    | Thermal correction to Gibbs Free Energy (au/Particle) |                    |              |                      |      |
| <b>eq-a</b> RB3LYP/6-31G(d)                   | -350.397463 | 0.171029                                              |                    |              |                      |      |
| <b>eq-g</b> RB3LYP/6-31G(d)                   | -350.393780 | 0.171352                                              |                    |              |                      |      |
| <b>ax-a</b> RB3LYP/6-31G(d)                   | -350.397064 | 0.171475                                              |                    |              |                      |      |
| <b>ax-g</b> RB3LYP/6-31G(d)                   | -350.386523 | 0.171233                                              |                    |              |                      |      |
| energy method                                 | $E$ (au)    | $G$ (au)                                              | rel $G$ (kcal/mol) | Population % | A-value (kcal/mol)   |      |
| <b>eq-a</b> RB3LYP-D3/6-311+G(2df,2p)         | -350.537390 | -350.366317                                           | 0                  | 37.3         | 76.0<br>0.68<br>24.0 |      |
| <b>eq-g</b> RB3LYP-D3/6-311+G(2df,2p)         | -350.534322 | -350.363289                                           | 1.900              | 1.5          |                      |      |
| <b>ax-a</b> RB3LYP-D3/6-311+G(2df,2p)         | -350.536566 | -350.365249                                           | 0.670              | 12.0         |                      |      |
| <b>ax-g</b> RB3LYP-D3/6-311+G(2df,2p)         | -350.527906 | -350.357066                                           | 5.805              | 0.002        |                      |      |
| <b>eq-a</b> R <b>w</b> B97X-D/6-311+G(2df,2p) | -350.409288 | -350.238215                                           | 0                  | 37.2         | 76.4<br>0.69<br>23.6 |      |
| <b>eq-g</b> R <b>w</b> B97X-D/6-311+G(2df,2p) | -350.406509 | -350.235476                                           | 1.719              | 2.0          |                      |      |
| <b>ax-a</b> R <b>w</b> B97X-D/6-311+G(2df,2p) | -350.408450 | -350.237133                                           | 0.679              | 11.8         |                      |      |
| <b>ax-g</b> R <b>w</b> B97X-D/6-311+G(2df,2p) | -350.400261 | -350.229421                                           | 5.518              | 0.003        |                      |      |
| <b>eq-a</b> RM06-2X/6-311+G(2df,2p)           | -350.347990 | -350.176917                                           | 0                  | 34.4         | 70.4<br>0.51<br>29.6 |      |
| <b>eq-g</b> RM06-2X /6-311+G(2df,2p)          | -350.345095 | -350.174062                                           | 1.792              | 1.7          |                      |      |
| <b>ax-a</b> RM06-2X/6-311+G(2df,2p)           | -350.347440 | -350.176122                                           | 0.499              | 14.8         |                      |      |
| <b>ax-g</b> RM06-2X /6-311+G(2df,2p)          | -350.338100 | -350.167260                                           | 6.060              | 0.001        |                      |      |
| geometry method                               | $E$ (au)    | Thermal correction to Gibbs Free Energy (au/Particle) |                    |              |                      |      |
| <b>eq-a</b> RB3LYP/6-31G*                     | -350.397503 | 0.160233                                              |                    |              |                      |      |
| <b>eq-g</b> RB3LYP/6-31G*                     | -350.393783 | 0.160186                                              |                    |              |                      |      |
| <b>ax-a</b> RB3LYP/6-31G*                     | -350.397012 | 0.160527                                              |                    |              |                      |      |
| <b>ax-g</b> RB3LYP/6-31G*                     | -350.386503 | 0.160262                                              |                    |              |                      |      |
| energy method                                 | $E$ (au)    | $G$ (au)                                              | rel $G$ (kcal/mol) | Population % | A-value (kcal/mol)   |      |
| <b>eq-a</b> R <b>w</b> B97X-V/6-311+G(2df,2p) | -350.418897 | -350.258664                                           | 0                  | 35.4         | 72.0                 | 0.56 |

|                                      |             |             |       |        |      |
|--------------------------------------|-------------|-------------|-------|--------|------|
| <b>eq-g</b> RwB97X-V/6-311+G(2df,2p) | -350.415708 | -350.255522 | 1.972 | 1.3    |      |
| <b>ax-a</b> RwB97X-V/6-311+G(2df,2p) | -350.418319 | -350.257792 | 0.547 | 14.0   |      |
| <b>ax-g</b> RwB97X-V/6-311+G(2df,2p) | -350.408927 | -350.248665 | 6.274 | 0.0009 | 28.0 |

| geometry method                | $E$ (au)    | Thermal correction to Gibbs Free Energy (au/Particle) |  |
|--------------------------------|-------------|-------------------------------------------------------|--|
| <b>eq-a</b> RB3LYP-D3/6-31G(d) | -350.415596 | 0.171562                                              |  |
| <b>eq-g</b> RB3LYP-D3/6-31G(d) | -350.412549 | 0.171251                                              |  |
| <b>ax-a</b> RB3LYP-D3/6-31G(d) | -350.415853 | 0.171867                                              |  |
| <b>ax-g</b> RB3LYP-D3/6-31G(d) | -350.406216 | 0.172148                                              |  |

| energy method                        | $E$ (au)    | $G$ (au)    | rel $G$ (kcal/mol) | Population % | A-value (kcal/mol) |
|--------------------------------------|-------------|-------------|--------------------|--------------|--------------------|
| <b>eq-a</b> RM06-2X/6-311+G(2df,2p)  | -350.348114 | -350.176552 | 0                  | 32.7         |                    |
| <b>eq-g</b> RM06-2X /6-311+G(2df,2p) | -350.345252 | -350.174002 | 1.600              | 2.2          | 67.5               |
| <b>ax-a</b> RM06-2X/6-311+G(2df,2p)  | -350.347763 | -350.175896 | 0.412              | 16.3         | 0.43               |
| <b>ax-g</b> RM06-2X /6-311+G(2df,2p) | -350.338446 | -350.166297 | 6.435              | 0.0006       | 32.5               |

| geometry method               | $E$ (au)    | Thermal correction to Gibbs Free Energy (au/Particle) |  |
|-------------------------------|-------------|-------------------------------------------------------|--|
| <b>eq-a</b> RwB97X-D/6-31G(d) | -350.297087 | 0.173396                                              |  |
| <b>eq-g</b> RwB97X-D/6-31G(d) | -350.294334 | 0.172691                                              |  |
| <b>ax-a</b> RwB97X-D/6-31G(d) | -350.297268 | 0.173981                                              |  |
| <b>ax-g</b> RwB97X-D/6-31G(d) | -350.288147 | 0.174530                                              |  |

| energy method                        | $E$ (au)    | $G$ (au)    | rel $G$ (kcal/mol) | Population % | A-value (kcal/mol) |
|--------------------------------------|-------------|-------------|--------------------|--------------|--------------------|
| <b>eq-a</b> RwB97X-D/6-311+G(2df,2p) | -350.409825 | -350.236429 | 0                  | 38.6         |                    |
| <b>eq-g</b> RwB97X-D/6-311+G(2df,2p) | -350.407058 | -350.234367 | 1.294              | 4.3          | 81.6               |
| <b>ax-a</b> RwB97X-D/6-311+G(2df,2p) | -350.409060 | -350.235078 | 0.848              | 9.2          | 0.88               |
| <b>ax-g</b> RwB97X-D/6-311+G(2df,2p) | -350.400882 | -350.226352 | 6.323              | 0.0009       | 18.4               |
| <b>eq-a</b> RM06-2X/6-311+G(2df,2p)  | -350.348618 | -350.175222 | 0                  | 34.4         |                    |
| <b>eq-g</b> RM06-2X /6-311+G(2df,2p) | -350.345776 | -350.173085 | 1.341              | 3.6          | 72.4               |
| <b>ax-a</b> RM06-2X/6-311+G(2df,2p)  | -350.348345 | -350.174363 | 0.539              | 13.8         | 0.57               |
| <b>ax-g</b> RM06-2X /6-311+G(2df,2p) | -350.338930 | -350.164400 | 6.791              | 0.0003       | 27.6               |

| geometry method             | $E$ (au)    | Thermal correction to Gibbs Free Energy (au/Particle) |  |
|-----------------------------|-------------|-------------------------------------------------------|--|
| <b>eq-a</b> RwB97X-D/6-31G* | -350.297087 | 0.160205                                              |  |
| <b>eq-g</b> RwB97X-D/6-31G* | -350.294334 | 0.162711                                              |  |



**ax-a** RωB97X-D/6-31G\* -350.297268 0.160867  
**ax-g** RωB97X-D/6-31G\* -350.288147 0.161161

| energy method                        | <i>E</i> (au) | <i>G</i> (au) | rel <i>G</i> (kcal/mol) | Population % | A-value (kcal/mol) |
|--------------------------------------|---------------|---------------|-------------------------|--------------|--------------------|
| <b>eq-a</b> RωB97X-V/6-311+G(2df,2p) | -350.419133   | -350.258928   | 0                       | 39.2         | 0.76               |
| <b>eq-g</b> RωB97X-V/6-311+G(2df,2p) | -350.415987   | -350.253276   | 3.547                   | 0.1          |                    |
| <b>ax-a</b> RωB97X-V/6-311+G(2df,2p) | -350.418582   | -350.257715   | 0.761                   | 10.8         |                    |
| <b>ax-g</b> RωB97X-V/6-311+G(2df,2p) | -350.409225   | -350.248064   | 6.817                   | 0.0004       |                    |

| geometry method              | <i>E</i> (au) | Thermal correction to Gibbs Free Energy (au/Particle) |
|------------------------------|---------------|-------------------------------------------------------|
| <b>eq-a</b> RM06-2X/6-31G(d) | -350.225516   | 0.173354                                              |
| <b>eq-g</b> RM06-2X/6-31G(d) | -350.222624   | 0.174696                                              |
| <b>ax-a</b> RM06-2X/6-31G(d) | -350.226264   | 0.174026                                              |
| <b>ax-g</b> RM06-2X/6-31G(d) | -350.215830   | 0.174033                                              |

| energy method                        | <i>E</i> (au) | <i>G</i> (au) | rel <i>G</i> (kcal/mol) | Population % | A-value (kcal/mol) |
|--------------------------------------|---------------|---------------|-------------------------|--------------|--------------------|
| <b>eq-a</b> RM06-2X/6-311+G(2df,2p)  | -350.348876   | -350.175406   | 0                       | 36.7         | 0.61               |
| <b>eq-g</b> RM06-2X /6-311+G(2df,2p) | -350.345911   | -350.171215   | 2.630                   | 0.4          |                    |
| <b>ax-a</b> RM06-2X/6-311+G(2df,2p)  | -350.348463   | -350.174463   | 0.608                   | 13.1         |                    |
| <b>ax-g</b> RM06-2X /6-311+G(2df,2p) | -350.339097   | -350.165064   | 6.490                   | 0.0006       |                    |

| geometry method             | <i>E</i> (au) | Thermal correction to Gibbs Free Energy (au/Particle) |
|-----------------------------|---------------|-------------------------------------------------------|
| <b>eq-a</b> RωB97X-V/6-31G* | -350.302920   | 0.172899                                              |
| <b>eq-g</b> RωB97X-V/6-31G* | -350.299786   | 0.172346                                              |
| <b>ax-a</b> RωB97X-V/6-31G* | -350.303646   | 0.173419                                              |
| <b>ax-g</b> RωB97X-V/6-31G* | -350.293174   | 0.173634                                              |

| energy method                        | <i>E</i> (au) | <i>G</i> (au) | rel <i>G</i> (kcal/mol) | Population % | A-value (kcal/mol) |
|--------------------------------------|---------------|---------------|-------------------------|--------------|--------------------|
| <b>eq-a</b> RM06-2X/6-311+G(2df,2p)  | -350.349709   | -350.176810   | 0                       | 35.5         | 0.62               |
| <b>eq-g</b> RM06-2X /6-311+G(2df,2p) | -350.346893   | -350.174547   | 1.420                   | 3.2          |                    |
| <b>ax-a</b> RM06-2X/6-311+G(2df,2p)  | -350.349278   | -350.175859   | 0.597                   | 12.9         |                    |
| <b>ax-g</b> RM06-2X /6-311+G(2df,2p) | -350.340062   | -350.166428   | 6.515                   | 0.0006       |                    |
| <b>eq-a</b> RωB97X-V/6-311+G(2df,2p) | -350.419058   | -350.246159   | 0                       | 37.6         | 0.73               |
| <b>eq-g</b> RωB97X-V/6-311+G(2df,2p) | -350.415928   | -350.243582   | 1.617                   | 2.4          |                    |
| <b>ax-a</b> RωB97X-V/6-311+G(2df,2p) | -350.418442   | -350.245023   | 0.713                   | 11.2         |                    |

| <b>ax-g</b> Rwb97X-V/6-311+G(2df,2p) | -350.409166   | -350.235532                                           | 6.668                   | 0.0005       |                    |
|--------------------------------------|---------------|-------------------------------------------------------|-------------------------|--------------|--------------------|
| geometry method                      | <i>E</i> (au) | Thermal correction to Gibbs Free Energy (au/Particle) |                         |              |                    |
| <b>eq-a</b> RMP2(FC)/6-31G(d)        | -349.177392   |                                                       |                         | 0.175548     |                    |
| <b>eq-g</b> RMP2(FC)/6-31G(d)        | -349.173576   |                                                       |                         | 0.176987     |                    |
| <b>ax-a</b> RMP2(FC)/6-31G(d)        | -349.178422   |                                                       |                         | 0.176145     |                    |
| <b>ax-g</b> RMP2(FC)/6-31G(d)        | -349.166095   |                                                       |                         | 0.176366     |                    |
| energy method                        | <i>E</i> (au) | <i>G</i> (au)                                         | rel <i>G</i> (kcal/mol) | Population % | A-value (kcal/mol) |
| <b>eq-a</b> RM06-2X/6-311+G(2df,2p)  | -350.348485   | -350.172938                                           | 0                       | 37.0         |                    |
| <b>eq-g</b> RM06-2X /6-311+G(2df,2p) | -350.345689   | -350.168702                                           | 2.658                   | 0.4          | 74.4               |
| <b>ax-a</b> RM06-2X/6-311+G(2df,2p)  | -350.348082   | -350.171937                                           | 0.628                   | 12.8         | 0.63               |
| <b>ax-g</b> RM06-2X /6-311+G(2df,2p) | -350.338884   | -350.162518                                           | 6.538                   | 0.0006       | 25.6               |
| <b>eq-a</b> RMP2(FC)/6-311+G(2df,2p) | -349.623121   | -349.447574                                           | 0                       | 35.6         |                    |
| <b>eq-g</b> RMP2(FC)/6-311+G(2df,2p) | -349.619914   | -349.442927                                           | 2.916                   | 0.3          | 71.4               |
| <b>ax-a</b> RMP2(FC)/6-311+G(2df,2p) | -349.622859   | -349.442927                                           | 0.539                   | 14.3         | 0.54               |
| <b>ax-g</b> RMP2(FC)/6-311+G(2df,2p) | -349.612448   | -349.436083                                           | 7.211                   | 0.0001       | 28.6               |
| geometry method                      | <i>E</i> (au) | Thermal correction to Gibbs Free Energy (au/Particle) |                         |              |                    |
| <b>eq-a</b> RMP2(FC)/6-31G*          | -349.177392   |                                                       |                         | 0.174889     |                    |
| <b>eq-g</b> RMP2(FC)/6-31G*          | -349.173576   |                                                       |                         | 0.177197     |                    |
| <b>ax-a</b> RMP2(FC)/6-31G*          | -349.178422   |                                                       |                         | 0.175533     |                    |
| <b>ax-g</b> RMP2(FC)/6-31G*          | -349.166095   |                                                       |                         | 0.175772     |                    |
| energy method                        | <i>E</i> (au) | <i>G</i> (au)                                         | rel <i>G</i> (kcal/mol) | Population % | A-value (kcal/mol) |
| <b>eq-a</b> Rwb97X-V/6-311+G(2df,2p) | -350.419159   | -350.244270                                           | 0                       | 40.3         |                    |
| <b>eq-g</b> Rwb97X-V/6-311+G(2df,2p) | -350.416061   | -350.238864                                           | 3.392                   | 0.1          | 80.8               |
| <b>ax-a</b> Rwb97X-V/6-311+G(2df,2p) | -350.418452   | -350.244921                                           | 0.846                   | 9.6          | 0.85               |
| <b>ax-g</b> Rwb97X-V/6-311+G(2df,2p) | -350.409299   | -350.235527                                           | 6.741                   | 0.0004       | 19.2               |
| geometry method                      | <i>E</i> (au) | <i>G</i> (au)                                         | rel <i>G</i> (kcal/mol) | Population % | A-value (kcal/mol) |
| <b>eq-a</b> RHF/6-311+G(d,p)         | -348.177698   | -347.995238                                           | 0                       | 40.9         |                    |
| <b>eq-g</b> RHF/6-311+G(d,p)         | -348.173379   | -347.989302                                           | 3.725                   | 0.07         | 81.8               |
| <b>ax-a</b> RHF/6-311+G(d,p)         | -348.176447   | -347.993822                                           | 0.889                   | 9.1          | 0.89               |
| <b>ax-g</b> RHF/6-311+G(d,p)         | -348.165173   | -347.982046                                           | 8.278                   | 0.00003      | 18.2               |

|                                    |             |             |       |        |      |      |
|------------------------------------|-------------|-------------|-------|--------|------|------|
| <b>eq-a</b> RB3LYP/6-311+G(d,p)    | -350.499247 | -350.330472 | 0     | 40.6   |      |      |
| <b>eq-g</b> RB3LYP/6-311+G(d,p)    | -350.495541 | -350.326765 | 2.326 | 0.8    | 82.1 |      |
| <b>ax-a</b> RB3LYP/6-311+G(d,p)    | -350.497897 | -350.329049 | 0.893 | 9.0    |      | 0.90 |
| <b>ax-g</b> RB3LYP/6-311+G(d,p)    | -350.488367 | -350.319504 | 6.882 | 0.0004 | 17.9 |      |
| <b>eq-a</b> RB3LYP-D3/6-311+G(d,p) | -350.517319 | -350.348048 | 0     | 36.0   |      |      |
| <b>eq-g</b> RB3LYP-D3/6-311+G(d,p) | -350.514294 | -350.345300 | 1.724 | 1.9    | 73.9 |      |
| <b>ax-a</b> RB3LYP-D3/6-311+G(d,p) | -350.516644 | -350.347091 | 0.601 | 13.0   |      | 0.62 |
| <b>ax-g</b> RB3LYP-D3/6-311+G(d,p) | -350.508040 | -350.338208 | 6.175 | 0.001  | 26.1 |      |
| <b>eq-a</b> RωB97X-D/6-311+G(d,p)  | -350.390575 | -350.219497 | 0     | 38.2   |      |      |
| <b>eq-g</b> RωB97X-D/6-311+G(d,p)  | -350.387859 | -350.215281 | 2.646 | 0.4    | 76.9 |      |
| <b>ax-a</b> RωB97X-D/6-311+G(d,p)  | -350.389976 | -350.218372 | 0.706 | 11.6   |      | 0.71 |
| <b>ax-g</b> RωB97X-D/6-311+G(d,p)  | -350.381852 | -350.209534 | 6.252 | 0.001  | 23.1 |      |
| <b>eq-a</b> RM06-2X/6-311+G(d,p)   | -350.328616 | -350.157025 | 0     | 33.2   | 68.0 |      |
| <b>eq-g</b> RM06-2X/6-311+G(d,p)   | -350.325826 | -350.154102 | 1.834 | 1.5    |      | 0.44 |
| <b>ax-a</b> RM06-2X/6-311+G(d,p)   | -350.328525 | -350.156338 | 0.431 | 16.0   | 32.0 |      |
| <b>ax-g</b> RM06-2X/6-311+G(d,p)   | -350.319133 | -350.146865 | 6.375 | 0.0007 |      |      |
| <b>eq-a</b> RωB97X-V/6-311+G**     | -350.401059 | -350.230857 | 0     | 33.5   |      |      |
| <b>eq-g</b> RωB97X-V/6-311+G**     | -350.397958 | -350.228500 | 1.479 | 2.7    | 69.8 |      |
| <b>ax-a</b> RωB97X-V/6-311+G**     | -350.400680 | -350.23107  | 0.471 | 15.1   |      | 0.49 |
| <b>ax-g</b> RωB97X-V/6-311+G**     | -350.391428 | -350.220343 | 6.598 | 0.0005 | 30.1 |      |
| <b>eq-a</b> RMP2(FC)/6-311+G(d,p)  | -349.429881 | -349.257788 | 0     | 34.6   |      |      |
| <b>eq-g</b> RMP2(FC)/6-311+G(d,p)  | -349.426423 | -349.254161 | 2.276 | 0.7    | 70.0 |      |
| <b>ax-a</b> RMP2(FC)/6-311+G(d,p)  | -349.429743 | -349.257002 | 0.493 | 15.0   |      | 0.50 |
| <b>ax-g</b> RMP2(FC)/6-311+G(d,p)  | -349.419107 | -349.246128 | 7.317 | 0.0001 | 30.0 |      |

## Cyclohexyl Acetate

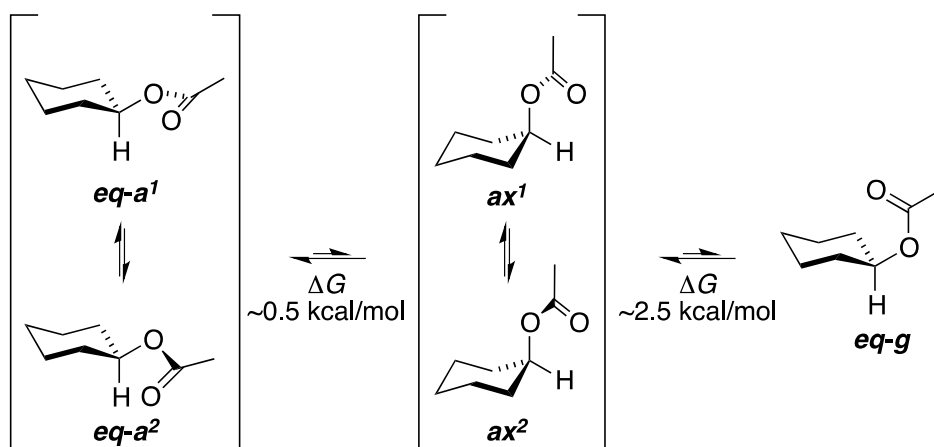

| geometry method                               | $E$ (au)    | Thermal correction to Gibbs Free Energy (au/Particle) |                    |              |                    |
|-----------------------------------------------|-------------|-------------------------------------------------------|--------------------|--------------|--------------------|
| <b>eq-a</b> RHF/6-31G(d)                      | -460.859794 | 0.193092                                              |                    |              |                    |
| <b>eq-g</b> RHF/6-31G(d)                      | -460.854951 | 0.193690                                              |                    |              |                    |
| <b>ax</b> RHF/6-31G(d)                        | -460.859089 | 0.193343                                              |                    |              |                    |
| energy method                                 | $E$ (au)    | $G$ (au)                                              | rel $G$ (kcal/mol) | Population % | A-value (kcal/mol) |
| <b>eq-a</b> R $\omega$ B97X-D/6-311+G(2df,2p) | -463.778899 | -463.585807                                           | 0                  | 37.2         | 74.7               |
| <b>eq-g</b> R $\omega$ B97X-D/6-311+G(2df,2p) | -463.774604 | -463.580914                                           | 3.071              | 0.2          |                    |
| <b>ax</b> R $\omega$ B97X-D/6-311+G(2df,2p)   | -463.778134 | -463.584791                                           | 0.638              | 12.7         |                    |
| <b>eq-a</b> RM06-2X/6-311+G(2df,2p)           | -463.715173 | -463.522081                                           | 0                  | 36.1         | 72.5               |
| <b>eq-g</b> RM06-2X /6-311+G(2df,2p)          | -463.711049 | -463.517359                                           | 2.963              | 0.2          |                    |
| <b>ax</b> RM06-2X/6-311+G(2df,2p)             | -463.714516 | -463.521173                                           | 0.570              | 13.8         |                    |
| geometry method                               | $E$ (au)    | Thermal correction to Gibbs Free Energy (au/Particle) |                    |              |                    |
| <b>eq-a</b> RHF/6-31G*                        | -460.859794 | 0.191878                                              |                    |              |                    |
| <b>eq-g</b> RHF/6-31G*                        | -460.854951 | 0.192533                                              |                    |              |                    |
| <b>ax</b> RHF/6-31G*                          | -460.859089 | 0.192096                                              |                    |              |                    |
| energy method                                 | $E$ (au)    | $G$ (au)                                              | rel $G$ (kcal/mol) | Population % | A-value (kcal/mol) |
| <b>eq-a</b> R $\omega$ B97X-V/6-311+G(2df,2p) | -463.792365 | -463.600487                                           | 0                  | 34.2         | 68.6               |
| <b>eq-g</b> R $\omega$ B97X-V/6-311+G(2df,2p) | -463.787860 | -463.595327                                           | 3.238              | 0.1          |                    |
| <b>ax</b> R $\omega$ B97X-V/6-311+G(2df,2p)   | -463.791848 | -463.599752                                           | 0.461              | 15.7         |                    |
| geometry method                               | $E$ (au)    | Thermal correction to Gibbs Free Energy (au/Particle) |                    |              |                    |
| <b>eq-a</b> RB3LYP/6-31G(d)                   | -463.762502 | 0.177138                                              |                    |              |                    |

**eq-g** RB3LYP/6-31G(d) -463.758348 0.177953

**ax** RB3LYP/6-31G(d) -463.761623 0.177352

| energy method                         | <i>E</i> (au) | <i>G</i> (au) | rel <i>G</i><br>(kcal/mol) | Population<br>% | A-value<br>(kcal/mol) |
|---------------------------------------|---------------|---------------|----------------------------|-----------------|-----------------------|
| <b>eq-a</b> RB3LYP-D3/6-311+G(2df,2p) | -463.946333   | -463.769196   | 0                          | 36.8            | 73.7                  |
| <b>eq-g</b> RB3LYP-D3/6-311+G(2df,2p) | -463.942273   | -463.764320   | 3.060                      | 0.2             |                       |
| <b>ax</b> RB3LYP-D3/6-311+G(2df,2p)   | -463.945578   | -463.768226   | 0.608                      | 13.1            | 26.3                  |
| <b>eq-a</b> RωB97X-D/6-311+G(2df,2p)  | -463.778698   | -460.601560   | 0                          | 37.5            | 75.1                  |
| <b>eq-g</b> RωB97X-D/6-311+G(2df,2p)  | -463.774398   | -463.596445   | 3.210                      | 0.2             |                       |
| <b>ax</b> RωB97X-D/6-311+G(2df,2p)    | -463.777874   | -463.600522   | 0.651                      | 12.4            | 24.9                  |
| <b>eq-a</b> RM06-2X/6-311+G(2df,2p)   | -463.714852   | -463.537714   | 0                          | 35.9            | 71.9                  |
| <b>eq-g</b> RM06-2X /6-311+G(2df,2p)  | -463.710788   | -463.532834   | 3.062                      | 0.2             |                       |
| <b>ax</b> RM06-2X/6-311+G(2df,2p)     | -463.714182   | -463.536830   | 0.554                      | 14.0            | 28.1                  |

| geometry method           | <i>E</i> (au) | Thermal correction to Gibbs Free Energy (au/Particle) |
|---------------------------|---------------|-------------------------------------------------------|
| <b>eq-a</b> RB3LYP/6-31G* | -463.762492   | 0.165056                                              |
| <b>eq-g</b> RB3LYP/6-31G* | -463.758355   | 0.166005                                              |
| <b>ax</b> RB3LYP/6-31G*   | -463.761625   | 0.165302                                              |

| energy method                        | <i>E</i> (au) | <i>G</i> (au) | rel <i>G</i><br>(kcal/mol) | Population<br>% | A-value<br>(kcal/mol) |
|--------------------------------------|---------------|---------------|----------------------------|-----------------|-----------------------|
| <b>eq-a</b> RωB97X-V/6-311+G(2df,2p) | -463.793645   | -463.628589   | 0                          | 34.8            | 69.8                  |
| <b>eq-g</b> RωB97X-V/6-311+G(2df,2p) | -463.789148   | -463.623143   | 3.417                      | 0.1             |                       |
| <b>ax</b> RωB97X-V/6-311+G(2df,2p)   | -463.793106   | -463.627804   | 0.493                      | 15.1            | 30.2                  |

| geometry method                | <i>E</i> (au) | Thermal correction to Gibbs Free Energy (au/Particle) |
|--------------------------------|---------------|-------------------------------------------------------|
| <b>eq-a</b> RB3LYP-D3/6-31G(d) | -463.783193   | 0.178052                                              |
| <b>eq-g</b> RB3LYP-D3/6-31G(d) | -463.780098   | 0.178793                                              |
| <b>ax</b> RB3LYP-D3/6-31G(d)   | -463.783149   | 0.178327                                              |

| energy method                        | <i>E</i> (au) | <i>G</i> (au) | rel <i>G</i><br>(kcal/mol) | Population<br>% | A-value<br>(kcal/mol) |
|--------------------------------------|---------------|---------------|----------------------------|-----------------|-----------------------|
| <b>eq-a</b> RM06-2X/6-311+G(2df,2p)  | -463.715111   | -463.537058   | 0                          | 36.1            | 72.4                  |
| <b>eq-g</b> RM06-2X /6-311+G(2df,2p) | -463.710967   | -463.532173   | 3.065                      | 0.2             |                       |
| <b>ax</b> RM06-2X/6-311+G(2df,2p)    | -463.714479   | -463.536152   | 0.569                      | 13.8            | 27.6                  |

| geometry method | <i>E</i> (au) | Thermal correction to Gibbs Free Energy (au/Particle) |
|-----------------|---------------|-------------------------------------------------------|
|-----------------|---------------|-------------------------------------------------------|

|                               |             |          |
|-------------------------------|-------------|----------|
| <b>eq-a</b> RωB97X-D/6-31G(d) | -463.627880 | 0.179649 |
| <b>eq-g</b> RωB97X-D/6-31G(d) | -463.624420 | 0.180170 |
| <b>ax</b> RωB97X-D/6-31G(d)   | -463.627633 | 0.180340 |

| energy method                        | <i>E</i> (au) | <i>G</i> (au) | rel <i>G</i><br>(kcal/mol) | Population<br>% | A-value<br>(kcal/mol) |
|--------------------------------------|---------------|---------------|----------------------------|-----------------|-----------------------|
| <b>eq-a</b> RωB97X-D/6-311+G(2df,2p) | -463.779488   | -463.599838   | 0                          | 41.6            | 83.5<br>0.96          |
| <b>eq-g</b> RωB97X-D/6-311+G(2df,2p) | -463.775173   | -463.595002   | 3.034                      | 0.2             |                       |
| <b>ax</b> RωB97X-D/6-311+G(2df,2p)   | -463.778657   | -463.598317   | 0.955                      | 8.3             |                       |
| <b>eq-a</b> RM06-2X/6-311+G(2df,2p)  | -463.715821   | -463.536172   | 0                          | 39.9            | 80.1<br>0.82          |
| <b>eq-g</b> RM06-2X /6-311+G(2df,2p) | -463.711722   | -463.531551   | 2.899                      | 0.3             |                       |
| <b>ax</b> RM06-2X/6-311+G(2df,2p)    | -463.715203   | -463.534863   | 0.821                      | 9.9             |                       |

| wgeometry method            | <i>E</i> (au) | Thermal correction to Gibbs Free Energy (au/Particle) |
|-----------------------------|---------------|-------------------------------------------------------|
| <b>eq-a</b> RωB97X-D/6-31G* | -463.627882   | 0.165650                                              |
| <b>eq-g</b> RωB97X-D/6-31G* | -463.624439   | 0.166471                                              |
| <b>ax</b> RωB97X-D/6-31G*   | -463.627629   | 0.165779                                              |

| energy method                        | <i>E</i> (au) | <i>G</i> (au) | rel <i>G</i><br>(kcal/mol) | Population<br>% | A-value<br>(kcal/mol) |
|--------------------------------------|---------------|---------------|----------------------------|-----------------|-----------------------|
| <b>eq-a</b> RωB97X-V/6-311+G(2df,2p) | -463.794124   | -463.628474   | 0                          | 33.5            | 67.1<br>0.42          |
| <b>eq-g</b> RωB97X-V/6-311+G(2df,2p) | -463.789602   | -463.623131   | 3.353                      | 0.1             |                       |
| <b>ax</b> RωB97X-V/6-311+G(2df,2p)   | -463.793582   | -463.627803   | 0.421                      | 16.4            |                       |

| geometry method              | <i>E</i> (au) | Thermal correction to Gibbs Free Energy (au/Particle) |
|------------------------------|---------------|-------------------------------------------------------|
| <b>eq-a</b> RM06-2X/6-31G(d) | -463.550782   | 0.180121                                              |
| <b>eq-g</b> RM06-2X/6-31G(d) | -463.547505   | 0.180633                                              |
| <b>ax</b> RM06-2X/6-31G(d)   | -463.550848   | 0.180456                                              |

| energy method                        | <i>E</i> (au) | <i>G</i> (au) | rel <i>G</i><br>(kcal/mol) | Population<br>% | A-value<br>(kcal/mol) |
|--------------------------------------|---------------|---------------|----------------------------|-----------------|-----------------------|
| <b>eq-a</b> RM06-2X/6-311+G(2df,2p)  | -463.715942   | -463.535821   | 0                          | 37.2            | 74.6<br>0.64          |
| <b>eq-g</b> RM06-2X /6-311+G(2df,2p) | -463.711834   | -463.531201   | 2.899                      | 0.3             |                       |
| <b>ax</b> RM06-2X/6-311+G(2df,2p)    | -463.715267   | -463.534812   | 0.633                      | 12.7            |                       |

| geometry method             | <i>E</i> (au) | Thermal correction to Gibbs Free Energy (au/Particle) |
|-----------------------------|---------------|-------------------------------------------------------|
| <b>eq-a</b> RωB97X-V/6-31G* | -463.637209   | 0.179110                                              |
| <b>eq-g</b> RωB97X-V/6-31G* | -463.633814   | 0.179904                                              |
| <b>ax</b> RωB97X-V/6-31G*   | -463.637511   | 0.179505                                              |

| energy method                                 | $E$ (au)    | $G$ (au)                                              | rel $G$ (kcal/mol) | Population % | A-value (kcal/mol) |
|-----------------------------------------------|-------------|-------------------------------------------------------|--------------------|--------------|--------------------|
| <b>eq-a</b> RM06-2X/6-311+G(2df,2p)           | -463.717365 | -463.538255                                           | 0                  | 38.0         | 76.1<br>0.68       |
| <b>eq-g</b> RM06-2X /6-311+G(2df,2p)          | -463.713173 | -463.533269                                           | 3.129              | 0.2          |                    |
| <b>ax</b> RM06-2X/6-311+G(2df,2p)             | -463.716671 | -463.537166                                           | 0.683              | 11.9         |                    |
| <b>eq-a</b> R $\omega$ B97X-V/6-311+G(2df,2p) | -463.793872 | -463.614762                                           | 0                  | 36.9         | 74.0<br>0.62       |
| <b>eq-g</b> R $\omega$ B97X-V/6-311+G(2df,2p) | -463.789357 | -463.609453                                           | 3.331              | 0.1          |                    |
| <b>ax</b> R $\omega$ B97X-V/6-311+G(2df,2p)   | -463.793283 | -463.613778                                           | 0.617              | 13.0         |                    |
| geometry method                               | $E$ (au)    | Thermal correction to Gibbs Free Energy (au/Particle) |                    |              |                    |
| <b>eq-a</b> RMP2(FC)/6-31G(d)                 | -462.248944 | 0.182127                                              |                    |              |                    |
| <b>eq-g</b> RMP2(FC)/6-31G(d)                 | -462.244874 | 0.182739                                              |                    |              |                    |
| <b>ax</b> RMP2(FC)/6-31G(d)                   | -462.249520 | 0.182459                                              |                    |              |                    |
| energy method                                 | $E$ (au)    | $G$ (au)                                              | rel $G$ (kcal/mol) | Population % | A-value (kcal/mol) |
| <b>eq-a</b> RM06-2X/6-311+G(2df,2p)           | -463.714935 | -463.532809                                           | 0                  | 37.5         | 75.3<br>0.66       |
| <b>eq-g</b> RM06-2X /6-311+G(2df,2p)          | -463.710843 | -463.528104                                           | 2.952              | 0.3          |                    |
| <b>ax</b> RM06-2X/6-311+G(2df,2p)             | -463.714221 | -463.531762                                           | 0.657              | 12.3         |                    |
| <b>eq-a</b> RMP2(FC)/6-311+G(2df,2p)          | -462.805574 | -462.623447                                           | 0                  | 34.3         | 68.7<br>0.46       |
| <b>eq-g</b> RMP2(FC)/6-311+G(2df,2p)          | -462.801007 | -462.618268                                           | 3.250              | 0.1          |                    |
| <b>ax</b> RMP2(FC)/6-311+G(2df,2p)            | -462.805170 | -462.622711                                           | 0.462              | 15.7         |                    |
| geometry method                               | $E$ (au)    | Thermal correction to Gibbs Free Energy (au/Particle) |                    |              |                    |
| <b>eq-a</b> RMP2(FC)/6-31G*                   | -462.248944 | 0.181038                                              |                    |              |                    |
| <b>eq-g</b> RMP2(FC)/6-31G*                   | -462.244874 | 0.181700                                              |                    |              |                    |
| <b>ax</b> RMP2(FC)/6-31G*                     | -462.249520 | 0.181347                                              |                    |              |                    |
| energy method                                 | $E$ (au)    | $G$ (au)                                              | rel $G$ (kcal/mol) | Population % | A-value (kcal/mol) |
| <b>eq-a</b> R $\omega$ B97X-V/6-311+G(2df,2p) | -463.793552 | -463.612514                                           | 0                  | 37.0         | 74.1<br>0.62       |
| <b>eq-g</b> R $\omega$ B97X-V/6-311+G(2df,2p) | -463.789039 | -463.607339                                           | 3.247              | 0.2          |                    |
| <b>ax</b> R $\omega$ B97X-V/6-311+G(2df,2p)   | -463.792872 | -463.611525                                           | 0.621              | 12.9         |                    |
| geometry method                               | $E$ (au)    | $G$ (au)                                              | rel $G$ (kcal/mol) | Population % | A-value (kcal/mol) |
| <b>eq-a</b> RHF/6-311+G(d,p)                  | -460.982028 | -460.792143                                           | 0                  | 40.2         | 80.4<br>0.83       |
| <b>eq-g</b> RHF/6-311+G(d,p)                  | -460.976403 | -460.785876                                           | 3.933              | 0.05         |                    |

|                                    |             |             |       |      |      |      |
|------------------------------------|-------------|-------------|-------|------|------|------|
| <b>ax</b> RHF/6-311+G(d,p)         | -460.980821 | -460.790815 | 0.833 | 9.8  | 19.6 |      |
| <b>eq-a</b> RB3LYP/6-311+G(d,p)    | -463.899507 | -463.725269 | 0     | 38.0 | 76.0 |      |
| <b>eq-g</b> RB3LYP/6-311+G(d,p)    | -463.894426 | -463.719557 | 3.584 | 0.09 |      | 0.68 |
| <b>ax</b> RB3LYP/6-311+G(d,p)      | -463.898146 | -463.724183 | 0.681 | 12.0 | 24.0 |      |
| <b>eq-a</b> RB3LYP-D3/6-311+G(d,p) | -463.920083 | -463.745167 | 0     | 37.0 | 74.2 |      |
| <b>eq-g</b> RB3LYP-D3/6-311+G(d,p) | -463.916103 | -463.740124 | 3.164 | 0.2  |      | 0.62 |
| <b>ax</b> RB3LYP-D3/6-311+G(d,p)   | -463.919509 | -463.744176 | 0.622 | 12.9 | 25.8 |      |
| <b>eq-a</b> RωB97X-D/6-311+G(d,p)  | -463.754065 | -463.577011 | 0     | 34.7 | 69.8 |      |
| <b>eq-g</b> RωB97X-D/6-311+G(d,p)  | -463.749880 | -463.572811 | 2.636 | 0.4  |      | 0.50 |
| <b>ax</b> RωB97X-D/6-311+G(d,p)    | -463.753423 | -463.576226 | 0.493 | 15.1 | 30.2 |      |
| <b>eq-a</b> RM06-2X/6-311+G(d,p)   | -463.689507 | -463.511498 | 0     | 31.7 | 63.8 |      |
| <b>eq-g</b> RM06-2X/6-311+G(d,p)   | -463.685528 | -463.507360 | 2.597 | 0.4  |      | 0.33 |
| <b>ax</b> RM06-2X/6-311+G(d,p)     | -463.689079 | -463.510970 | 0.331 | 18.1 | 36.2 |      |
| <b>eq-a</b> RωB97X-V/6-311+G**     | -463.769412 | -463.593772 | 0     | 30.4 | 61.0 |      |
| <b>eq-g</b> RωB97X-V/6-311+G**     | -463.765042 | -463.588851 | 3.088 | 0.2  |      | 0.26 |
| <b>ax</b> RωB97X-V/6-311+G**       | -463.769083 | -463.593355 | 0.262 | 19.5 | 39.0 |      |
| <b>eq-a</b> RMP2(FC)/6-311+G(d,p)  | -462.554022 | -462.375884 | 0     | 34.3 | 69.0 |      |
| <b>eq-g</b> RMP2(FC)/6-311+G(d,p)  | -462.549157 | -462.371587 | 2.696 | 0.4  |      | 0.47 |
| <b>ax</b> RMP2(FC)/6-311+G(d,p)    | -462.553805 | -462.375135 | 0.470 | 15.5 | 31.0 |      |



## *N,N*-Dimethylaminocyclohexane

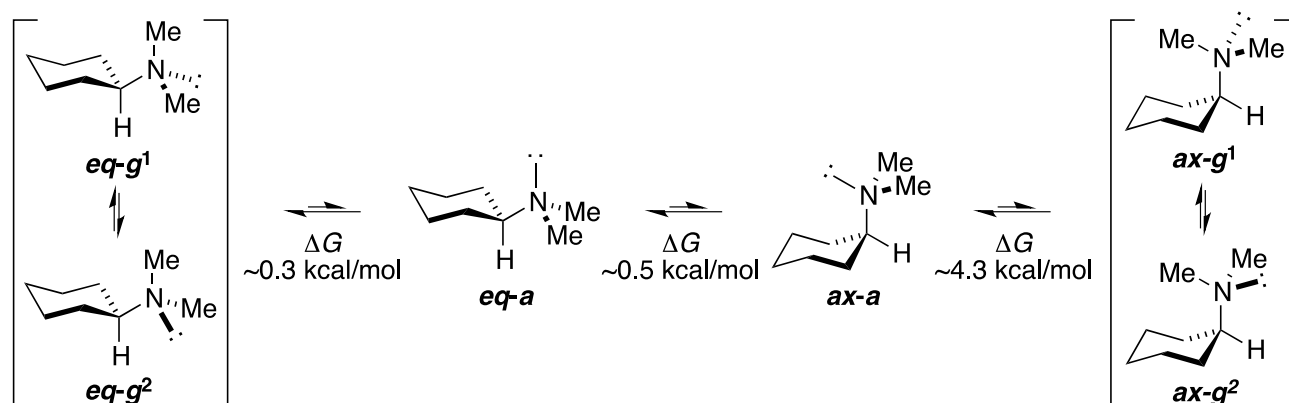

| geometry method          | $E$ (au)    | Thermal correction to Gibbs Free Energy (au/Particle) |  |  |  |
|--------------------------|-------------|-------------------------------------------------------|--|--|--|
| <b>eq-g</b> RHF/6-31G(d) | -367.280676 | 0.227805                                              |  |  |  |
| <b>eq-a</b> RHF/6-31G(d) | -367.278790 | 0.227571                                              |  |  |  |
| <b>ax-a</b> RHF/6-31G(d) | -367.278080 | 0.228649                                              |  |  |  |
| <b>ax-g</b> RHF/6-31G(d) | -367.271387 | 0.228010                                              |  |  |  |

  

| energy method                        | $E$ (au)    | $G$ (au)    | rel $G$ (kcal/mol) | Population % | A-value (kcal/mol) |
|--------------------------------------|-------------|-------------|--------------------|--------------|--------------------|
| <b>eq-g</b> Rwb97X-D/6-311+G(2df,2p) | -369.848748 | -369.620943 | 0                  | 39.3         | 95.7               |
| <b>eq-a</b> Rwb97X-D/6-311+G(2df,2p) | -369.847728 | -369.620157 | 0.494              | 17.0         |                    |
| <b>ax-a</b> Rwb97X-D/6-311+G(2df,2p) | -369.847510 | -369.618860 | 1.307              | 4.3          | 4.3                |
| <b>ax-g</b> Rwb97X-D/6-311+G(2df,2p) | -369.841805 | -369.613795 | 4.485              | 0.02         |                    |
| <b>eq-g</b> RM06-2X/6-311+G(2df,2p)  | -369.774741 | -369.546906 | 0.012              | 30.1         | 91.0               |
| <b>eq-a</b> RM06-2X /6-311+G(2df,2p) | -369.774497 | -369.546925 | 0                  | 30.8         |                    |
| <b>ax-a</b> RM06-2X/6-311+G(2df,2p)  | -369.774417 | -369.545767 | 0.727              | 9.0          | 1.37               |
| <b>ax-g</b> RM06-2X /6-311+G(2df,2p) | -369.766984 | -369.538974 | 4.989              | 0.007        |                    |

  

| geometry method        | $E$ (au)    | Thermal correction to Gibbs Free Energy (au/Particle) |  |  |  |
|------------------------|-------------|-------------------------------------------------------|--|--|--|
| <b>eq-g</b> RHF/6-31G* | -367.280676 | 0.227142                                              |  |  |  |
| <b>eq-a</b> RHF/6-31G* | -367.278790 | 0.226770                                              |  |  |  |
| <b>ax-a</b> RHF/6-31G* | -367.278080 | 0.227886                                              |  |  |  |
| <b>ax-g</b> RHF/6-31G* | -367.271387 | 0.227322                                              |  |  |  |

  

| energy method                        | $E$ (au)    | $G$ (au)    | rel $G$ (kcal/mol) | Population % | A-value (kcal/mol) |      |
|--------------------------------------|-------------|-------------|--------------------|--------------|--------------------|------|
| <b>eq-g</b> Rwb97X-V/6-311+G(2df,2p) | -369.858434 | -369.631292 | 0                  | 32.3         | 93.3               | 1.55 |

|                                               |             |             |       |       |     |
|-----------------------------------------------|-------------|-------------|-------|-------|-----|
| <b>eq-a</b> R <b>w</b> B97X-V/6-311+G(2df,2p) | -369.857946 | -369.631176 | 0.073 | 28.6  |     |
| <b>ax-a</b> R <b>w</b> B97X-V/6-311+G(2df,2p) | -369.857696 | -369.629810 | 0.930 | 6.7   |     |
| <b>ax-g</b> R <b>w</b> B97X-V/6-311+G(2df,2p) | -369.850899 | -369.623577 | 4.841 | 0.009 | 6.7 |

| geometry method             | <i>E</i> (au) | Thermal correction to Gibbs Free Energy (au/Particle) |  |  |  |
|-----------------------------|---------------|-------------------------------------------------------|--|--|--|
| <b>eq-g</b> RB3LYP/6-31G(d) | -369.837228   | 0.210561                                              |  |  |  |
| <b>eq-a</b> RB3LYP/6-31G(d) | -369.836097   | 0.210239                                              |  |  |  |
| <b>ax-a</b> RB3LYP/6-31G(d) | -369.835149   | 0.211065                                              |  |  |  |
| <b>ax-g</b> RB3LYP/6-31G(d) | -369.829356   | 0.210744                                              |  |  |  |

| energy method                                 | <i>E</i> (au) | <i>G</i> (au) | rel <i>G</i> (kcal/mol) | Population % | A-value (kcal/mol) |
|-----------------------------------------------|---------------|---------------|-------------------------|--------------|--------------------|
| <b>eq-g</b> RB3LYP-D3/6-311+G(2df,2p)         | -369.983888   | -369.773328   | 0                       | 39.3         |                    |
| <b>eq-a</b> RB3LYP-D3/6-311+G(2df,2p)         | -369.982796   | -369.772557   | 0.484                   | 17.3         | 96.0               |
| <b>ax-a</b> RB3LYP-D3/6-311+G(2df,2p)         | -369.982233   | -369.771168   | 1.355                   | 4.0          | 1.88               |
| <b>ax-g</b> RB3LYP-D3/6-311+G(2df,2p)         | -369.976706   | -369.765962   | 4.622                   | 0.02         | 4.0                |
| <b>eq-g</b> R <b>w</b> B97X-D/6-311+G(2df,2p) | -369.848520   | -369.637959   | 0                       | 38.3         |                    |
| <b>eq-a</b> R <b>w</b> B97X-D/6-311+G(2df,2p) | -369.847478   | -369.637240   | 0.466                   | 17.8         | 94.4               |
| <b>ax-a</b> R <b>w</b> B97X-D/6-311+G(2df,2p) | -369.847215   | -369.636150   | 1.135                   | 5.6          | 1.66               |
| <b>ax-g</b> R <b>w</b> B97X-D/6-311+G(2df,2p) | -369.841625   | -369.630881   | 4.442                   | 0.02         | 5.6                |
| <b>eq-g</b> RM06-2X/6-311+G(2df,2p)           | -369.774471   | -369.563910   | 0.028                   | 29.1         |                    |
| <b>eq-a</b> RM06-2X /6-311+G(2df,2p)          | -369.774193   | -369.563954   | 0                       | 30.5         | 88.7               |
| <b>ax-a</b> RM06-2X/6-311+G(2df,2p)           | -369.774084   | -369.563019   | 0.587                   | 11.3         | 1.22               |
| <b>ax-g</b> RM06-2X /6-311+G(2df,2p)          | -369.766790   | -369.556046   | 4.962                   | 0.007        | 11.3               |

| geometry method           | <i>E</i> (au) | Thermal correction to Gibbs Free Energy (au/Particle) |  |  |  |
|---------------------------|---------------|-------------------------------------------------------|--|--|--|
| <b>eq-g</b> RB3LYP/6-31G* | -369.837227   | 0.197662                                              |  |  |  |
| <b>eq-a</b> RB3LYP/6-31G* | -369.836097   | 0.197218                                              |  |  |  |
| <b>ax-a</b> RB3LYP/6-31G* | -369.835149   | 0.198029                                              |  |  |  |
| <b>ax-g</b> RB3LYP/6-31G* | -369.829353   | 0.197762                                              |  |  |  |

| energy method                                 | <i>E</i> (au) | <i>G</i> (au) | rel <i>G</i> (kcal/mol) | Population % | A-value (kcal/mol) |
|-----------------------------------------------|---------------|---------------|-------------------------|--------------|--------------------|
| <b>eq-g</b> R <b>w</b> B97X-V/6-311+G(2df,2p) | -369.859231   | -369.661569   | 0                       | 31.1         |                    |
| <b>eq-a</b> R <b>w</b> B97X-V/6-311+G(2df,2p) | -369.858708   | -369.661490   | 0.050                   | 28.6         | 90.9               |
| <b>ax-a</b> R <b>w</b> B97X-V/6-311+G(2df,2p) | -369.858440   | -369.660411   | 0.727                   | 9.1          | 9.1                |

**ax-g** R $\omega$ B97X-V/6-311+G(2df,2p) -369.851740 -369.653978 4.763 0.01

| geometry method                | $E$ (au)    | Thermal correction to Gibbs Free Energy (au/Particle) |
|--------------------------------|-------------|-------------------------------------------------------|
| <b>eq-g</b> RB3LYP-D3/6-31G(d) | -369.860609 | 0.211393                                              |
| <b>eq-a</b> RB3LYP-D3/6-31G(d) | -369.858908 | 0.210734                                              |
| <b>ax-a</b> RB3LYP-D3/6-31G(d) | -369.859457 | 0.211956                                              |
| <b>ax-g</b> RB3LYP-D3/6-31G(d) | -369.853545 | 0.211356                                              |

| energy method                        | $E$ (au)    | $G$ (au)    | rel $G$ (kcal/mol) | Population % | A-value (kcal/mol) |
|--------------------------------------|-------------|-------------|--------------------|--------------|--------------------|
| <b>eq-g</b> RM06-2X/6-311+G(2df,2p)  | -369.774740 | -369.563348 | 0.170              | 27.0         | 1.30               |
| <b>eq-a</b> RM06-2X /6-311+G(2df,2p) | -369.774353 | -369.563618 | 0                  | 36.0         |                    |
| <b>ax-a</b> RM06-2X/6-311+G(2df,2p)  | -369.774358 | -369.562402 | 0.764              | 9.9          |                    |
| <b>ax-g</b> RM06-2X /6-311+G(2df,2p) | -369.767109 | -369.555753 | 4.936              | 0.008        |                    |

| geometry method                        | $E$ (au)    | Thermal correction to Gibbs Free Energy (au/Particle) |
|----------------------------------------|-------------|-------------------------------------------------------|
| <b>eq-g</b> R $\omega$ B97X-D/6-31G(d) | -369.735569 | 0.213498                                              |
| <b>eq-a</b> R $\omega$ B97X-D/6-31G(d) | -369.733865 | 0.213584                                              |
| <b>ax-a</b> R $\omega$ B97X-D/6-31G(d) | -369.734719 | 0.213791                                              |
| <b>ax-g</b> R $\omega$ B97X-D/6-31G(d) | -369.728748 | 0.213813                                              |

| energy method                                 | $E$ (au)    | $G$ (au)    | rel $G$ (kcal/mol) | Population % | A-value (kcal/mol) |
|-----------------------------------------------|-------------|-------------|--------------------|--------------|--------------------|
| <b>eq-g</b> R $\omega$ B97X-D/6-311+G(2df,2p) | -369.849182 | -369.635684 | 0                  | 40.8         | 1.54               |
| <b>eq-a</b> R $\omega$ B97X-D/6-311+G(2df,2p) | -369.848075 | -369.634490 | 0.749              | 11.5         |                    |
| <b>ax-a</b> R $\omega$ B97X-D/6-311+G(2df,2p) | -369.847798 | -369.634007 | 1.053              | 6.9          |                    |
| <b>ax-g</b> R $\omega$ B97X-D/6-311+G(2df,2p) | -369.842336 | -369.628523 | 4.494              | 0.02         |                    |
| <b>eq-g</b> RM06-2X/6-311+G(2df,2p)           | -369.775227 | -369.561767 | 0                  | 32.2         | 0.98               |
| <b>eq-a</b> RM06-2X /6-311+G(2df,2p)          | -369.774885 | -369.561300 | 0.293              | 19.6         |                    |
| <b>ax-a</b> RM06-2X/6-311+G(2df,2p)           | -369.774899 | -369.561108 | 0.414              | 16.0         |                    |
| <b>ax-g</b> RM06-2X /6-311+G(2df,2p)          | -369.767650 | -369.553837 | 4.976              | 0.007        |                    |

| geometry method                      | $E$ (au)    | Thermal correction to Gibbs Free Energy (au/Particle) |
|--------------------------------------|-------------|-------------------------------------------------------|
| <b>eq-g</b> R $\omega$ B97X-D/6-31G* | -369.735568 | 0.197792                                              |
| <b>eq-a</b> R $\omega$ B97X-D/6-31G* | -369.733865 | 0.197849                                              |
| <b>ax-a</b> R $\omega$ B97X-D/6-31G* | -369.734717 | 0.198203                                              |
| <b>ax-g</b> R $\omega$ B97X-D/6-31G* | -369.728747 | 0.198184                                              |

| energy method                                 | $E$ (au)    | $G$ (au)                                              | rel $G$ (kcal/mol) | Population % | A-value (kcal/mol) |
|-----------------------------------------------|-------------|-------------------------------------------------------|--------------------|--------------|--------------------|
| <b>eq-g</b> R $\omega$ B97X-V/6-311+G(2df,2p) | -369.859697 | -369.661905                                           | 0                  | 36.7         | 91.1<br>1.37       |
| <b>eq-a</b> R $\omega$ B97X-V/6-311+G(2df,2p) | -369.859074 | -369.661225                                           | 0.427              | 17.8         |                    |
| <b>ax-a</b> R $\omega$ B97X-V/6-311+G(2df,2p) | -369.858774 | -369.660571                                           | 0.837              | 8.9          |                    |
| <b>ax-g</b> R $\omega$ B97X-V/6-311+G(2df,2p) | -369.852210 | -369.654026                                           | 4.944              | 0.008        |                    |
| geometry method                               | $E$ (au)    | Thermal correction to Gibbs Free Energy (au/Particle) |                    |              |                    |
| <b>eq-g</b> RM06-2X/6-31G(d)                  | -369.650573 | 0.213214                                              |                    |              |                    |
| <b>eq-a</b> RM06-2X/6-31G(d)                  | -369.649669 | 0.213172                                              |                    |              |                    |
| <b>ax-a</b> RM06-2X/6-31G(d)                  | -369.650860 | 0.214212                                              |                    |              |                    |
| <b>ax-g</b> RM06-2X/6-31G(d)                  | -369.643061 | 0.213594                                              |                    |              |                    |
| energy method                                 | $E$ (au)    | $G$ (au)                                              | rel $G$ (kcal/mol) | Population % | A-value (kcal/mol) |
| <b>eq-g</b> RM06-2X/6-311+G(2df,2p)           | -369.775428 | -369.562214                                           | 0                  | 34.5         | 92.2<br>1.46       |
| <b>eq-a</b> RM06-2X /6-311+G(2df,2p)          | -369.775015 | -369.561843                                           | 0.233              | 23.3         |                    |
| <b>ax-a</b> RM06-2X/6-311+G(2df,2p)           | -369.775020 | -369.560808                                           | 0.883              | 7.7          |                    |
| <b>ax-g</b> RM06-2X /6-311+G(2df,2p)          | -369.767824 | -369.554230                                           | 5.011              | 0.007        |                    |
| geometry method                               | $E$ (au)    | Thermal correction to Gibbs Free Energy (au/Particle) |                    |              |                    |
| <b>eq-g</b> R $\omega$ B97X-V/6-31G*          | -369.743074 | 0.213015                                              |                    |              |                    |
| <b>eq-a</b> R $\omega$ B97X-V/6-31G*          | -369.741772 | 0.212594                                              |                    |              |                    |
| <b>ax-a</b> R $\omega$ B97X-V/6-31G*          | -369.742946 | 0.213759                                              |                    |              |                    |
| <b>ax-g</b> R $\omega$ B97X-V/6-31G*          | -369.735788 | 0.213294                                              |                    |              |                    |
| energy method                                 | $E$ (au)    | $G$ (au)                                              | rel $G$ (kcal/mol) | Population % | A-value (kcal/mol) |
| <b>eq-g</b> RM06-2X/6-311+G(2df,2p)           | -369.776292 | -369.563277                                           | 0.022              | 30.4         | 92.2<br>1.46       |
| <b>eq-a</b> RM06-2X /6-311+G(2df,2p)          | -369.775906 | -369.563312                                           | 0                  | 31.5         |                    |
| <b>ax-a</b> RM06-2X/6-311+G(2df,2p)           | -369.775755 | -369.561996                                           | 0.826              | 7.8          |                    |
| <b>ax-g</b> RM06-2X /6-311+G(2df,2p)          | -369.768672 | -369.555378                                           | 4.979              | 0.007        |                    |
| <b>eq-g</b> R $\omega$ B97X-V/6-311+G(2df,2p) | -369.859565 | -369.646550                                           | 0                  | 33.8         | 94.6<br>1.69       |
| <b>eq-a</b> R $\omega$ B97X-V/6-311+G(2df,2p) | -369.858934 | -369.646340                                           | 0.131              | 27.0         |                    |
| <b>ax-a</b> R $\omega$ B97X-V/6-311+G(2df,2p) | -369.858576 | -369.644817                                           | 1.087              | 5.4          |                    |
| <b>ax-g</b> R $\omega$ B97X-V/6-311+G(2df,2p) | -369.852077 | -369.638783                                           | 4.874              | 0.009        |                    |
| geometry method                               | $E$ (au)    | Thermal correction to Gibbs Free Energy (au/Particle) |                    |              |                    |

|                               |             |          |
|-------------------------------|-------------|----------|
| <b>eq-g</b> RMP2(FC)/6-31G(d) | -368.495037 | 0.216191 |
| <b>eq-a</b> RMP2(FC)/6-31G(d) | -368.494294 | 0.215998 |
| <b>ax-a</b> RMP2(FC)/6-31G(d) | -368.495760 | 0.217154 |
| <b>ax-g</b> RMP2(FC)/6-31G(d) | -368.486785 | 0.216506 |

| energy method                        | <i>E</i> (au) | <i>G</i> (au) | rel <i>G</i> (kcal/mol) | Population % | A-value (kcal/mol) |
|--------------------------------------|---------------|---------------|-------------------------|--------------|--------------------|
| <b>eq-g</b> RM06-2X/6-311+G(2df,2p)  | -369.775348   | -369.559157   | 0                       | 33.5         | 92.9<br>1.52       |
| <b>eq-a</b> RM06-2X/6-311+G(2df,2p)  | -369.774915   | -369.558916   | 0.151                   | 25.9         |                    |
| <b>ax-a</b> RM06-2X/6-311+G(2df,2p)  | -369.774845   | -369.557690   | 0.9200                  | 7.1          |                    |
| <b>ax-g</b> RM06-2X/6-311+G(2df,2p)  | -369.767709   | -369.551203   | 4.991                   | 0.007        |                    |
| <b>eq-g</b> RMP2(FC)/6-311+G(2df,2p) | -368.973753   | -368.757562   | 0.162                   | 25.8         | 85.5<br>1.05       |
| <b>eq-a</b> RMP2(FC)/6-311+G(2df,2p) | -368.973818   | -368.757819   | 0                       | 33.9         |                    |
| <b>ax-a</b> RMP2(FC)/6-311+G(2df,2p) | -368.974174   | -368.757020   | 0.501                   | 14.5         |                    |
| <b>ax-g</b> RMP2(FC)/6-311+G(2df,2p) | -368.965784   | -368.749287   | 5.360                   | 0.004        |                    |

| geometry method             | <i>E</i> (au) | Thermal correction to Gibbs Free Energy (au/Particle) |
|-----------------------------|---------------|-------------------------------------------------------|
| <b>eq-g</b> RMP2(FC)/6-31G* | -368.495037   | 0.215614                                              |
| <b>eq-a</b> RMP2(FC)/6-31G* | -368.494294   | 0.215305                                              |
| <b>ax-a</b> RMP2(FC)/6-31G* | -368.495760   | 0.216512                                              |
| <b>ax-g</b> RMP2(FC)/6-31G* | -368.486785   | 0.215941                                              |

| energy method                        | <i>E</i> (au) | <i>G</i> (au) | rel <i>G</i> (kcal/mol) | Population % | A-value (kcal/mol) |
|--------------------------------------|---------------|---------------|-------------------------|--------------|--------------------|
| <b>eq-g</b> Rwb97X-V/6-311+G(2df,2p) | -369.859725   | -369.644111   | 0                       | 35.6         | 95.8<br>1.85       |
| <b>eq-a</b> Rwb97X-V/6-311+G(2df,2p) | -369.859068   | -369.643763   | 0.218                   | 24.6         |                    |
| <b>ax-a</b> Rwb97X-V/6-311+G(2df,2p) | -369.858609   | -369.642097   | 1.264                   | 4.2          |                    |
| <b>ax-g</b> Rwb97X-V/6-311+G(2df,2p) | -369.852232   | -369.636291   | 4.907                   | 0.009        |                    |

| geometry method                 | <i>E</i> (au) | <i>G</i> (au) | rel <i>G</i> (kcal/mol) | Population % | A-value (kcal/mol) |
|---------------------------------|---------------|---------------|-------------------------|--------------|--------------------|
| <b>eq-g</b> RHF/6-311+G(d,p)    | -367.372837   | -367.148546   | 0                       | 43.6         | 99.2<br>2.85       |
| <b>eq-a</b> RHF/6-311+G(d,p)    | -367.371412   | -367.147327   | 0.765                   | 11.9         |                    |
| <b>ax-a</b> RHF/6-311+G(d,p)    | -367.369687   | -367.144781   | 2.363                   | 0.8          |                    |
| <b>ax-g</b> RHF/6-311+G(d,p)    | -367.363586   | -367.139012   | 5.983                   | 0.002        |                    |
| <b>eq-g</b> RB3LYP/6-311+G(d,p) | -369.939806   | -369.732019   | 0                       | 36.8         | 97.9<br>2.26       |
| <b>eq-a</b> RB3LYP/6-311+G(d,p) | -369.939167   | -369.731627   | 0.246                   | 24.3         |                    |

|                                    |             |             |       |       |      |      |
|------------------------------------|-------------|-------------|-------|-------|------|------|
| <b>ax-a</b> RB3LYP/6-311+G(d,p)    | -369.937362 | -369.729338 | 1.682 | 2.1   |      |      |
| <b>ax-g</b> RB3LYP/6-311+G(d,p)    | -369.931953 | -369.724015 | 5.023 | 0.00  | 2.1  |      |
| <b>eq-g</b> RB3LYP-D3/6-311+G(d,p) | -369.963201 | -369.754564 | 0     | 37.8  | 94.2 |      |
| <b>eq-a</b> RB3LYP-D3/6-311+G(d,p) | -369.961980 | -369.753902 | 0.415 | 18.7  |      | 1.65 |
| <b>ax-a</b> RB3LYP-D3/6-311+G(d,p) | -369.961556 | -369.752790 | 1.113 | 5.7   | 5.8  |      |
| <b>ax-g</b> RB3LYP-D3/6-311+G(d,p) | -369.956165 | -369.747569 | 4.389 | 0.02  |      |      |
| <b>eq-g</b> RωB97X-D/6-311+G(d,p)  | -369.829560 | -369.618909 | 0     | 40.2  | 90.8 |      |
| <b>eq-a</b> RωB97X-D/6-311+G(d,p)  | -369.828363 | -369.617644 | 0.794 | 10.5  |      | 1.35 |
| <b>ax-a</b> RωB97X-D/6-311+G(d,p)  | -369.828270 | -369.617517 | 0.873 | 9.2   | 9.2  |      |
| <b>ax-g</b> RωB97X-D/6-311+G(d,p)  | -369.822884 | -369.611675 | 4.539 | 0.02  |      |      |
| <b>eq-g</b> RM06-2X/6-311+G(d,p)   | -369.754526 | -369.543561 | 0     | 35.4  | 89.9 |      |
| <b>eq-a</b> RM06-2X/6-311+G(d,p)   | -369.753966 | -369.542974 | 0.368 | 19.0  |      | 1.29 |
| <b>ax-a</b> RM06-2X/6-311+G(d,p)   | -369.754203 | -369.542379 | 0.742 | 10.1  | 10.1 |      |
| <b>ax-g</b> RM06-2X/6-311+G(d,p)   | -369.747080 | -369.535615 | 4.986 | 0.008 |      |      |
| <b>eq-g</b> RωB97X-V/6-311+G**     | -369.841457 | -369.631677 | 0     | 34.0  | 91.4 |      |
| <b>eq-a</b> RωB97X-V/6-311+G**     | -369.840693 | -369.631325 | 0.221 | 23.4  |      | 1.40 |
| <b>ax-a</b> RωB97X-V/6-311+G**     | -369.840583 | -369.630379 | 0.814 | 8.6   | 8.6  |      |
| <b>ax-g</b> RωB97X-V/6-311+G**     | -369.834177 | -369.624047 | 4.788 | 0.01  |      |      |
| <b>eq-g</b> RMP2(FC)/6-311+G(d,p)  | -368.768125 | -368.556449 | 0.071 | 25.3  | 79.2 |      |
| <b>eq-a</b> RMP2(FC)/6-311+G(d,p)  | -368.768147 | -368.556562 | 0     | 28.6  |      | 0.79 |
| <b>ax-a</b> RMP2(FC)/6-311+G(d,p)  | -368.768554 | -368.556263 | 0.188 | 20.8  | 20.8 |      |
| <b>ax-g</b> RMP2(FC)/6-311+G(d,p)  | -368.760394 | -368.548248 | 5.217 | 0.004 |      |      |

## Nitrocyclohexane

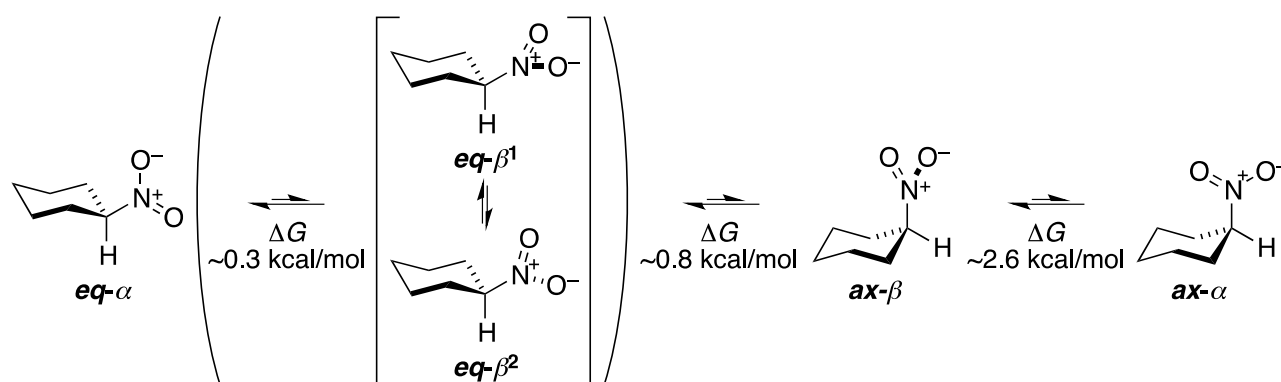

| geometry method          | $E$ (au)    | Thermal correction to Gibbs Free Energy (au/Particle) |  |  |  |
|--------------------------|-------------|-------------------------------------------------------|--|--|--|
| <b>eq-α</b> RHF/6-31G(d) | -437.684901 | 0.153806                                              |  |  |  |
| <b>ax-β</b> RHF/6-31G(d) | -437.682219 | 0.153276                                              |  |  |  |
| <b>ax-α</b> RHF/6-31G(d) | -437.681436 | 0.155931                                              |  |  |  |

  

| energy method                        | $E$ (au)    | $G$ (au)    | rel $G$ (kcal/mol) | Population % | A-value (kcal/mol) |
|--------------------------------------|-------------|-------------|--------------------|--------------|--------------------|
| <b>eq-α</b> Rwb97X-D/6-311+G(2df,2p) | -440.401212 | -440.247406 | 0                  | 79.8         | 79.8               |
| <b>ax-β</b> Rwb97X-D/6-311+G(2df,2p) | -440.399378 | -440.246102 | 0.818              | 20.0         | 0.81               |
| <b>ax-α</b> Rwb97X-D/6-311+G(2df,2p) | -440.397854 | -440.241923 | 3.44               | 0.2          | 20.2               |

  

|                                      |             |             |       |      |      |
|--------------------------------------|-------------|-------------|-------|------|------|
| <b>eq-α</b> RM06-2X/6-311+G(2df,2p)  | -440.343176 | -440.18970  | 0     | 65.7 | 65.7 |
| <b>ax-β</b> RM06-2X/6-311+G(2df,2p)  | -440.342025 | -440.188749 | 0.389 | 34.0 | 0.39 |
| <b>ax-α</b> RM06-2X /6-311+G(2df,2p) | -440.340012 | -440.184081 | 3.319 | 0.2  | 34.3 |

  

| geometry method        | $E$ (au)    | Thermal correction to Gibbs Free Energy (au/Particle) |  |  |  |
|------------------------|-------------|-------------------------------------------------------|--|--|--|
| <b>eq-α</b> RHF/6-31G* | -437.684901 | 0.153088                                              |  |  |  |
| <b>ax-β</b> RHF/6-31G* | -437.682218 | 0.152538                                              |  |  |  |
| <b>ax-α</b> RHF/6-31G* | -437.681436 | 0.156113                                              |  |  |  |

  

| energy method                        | $E$ (au)    | $G$ (au)    | rel $G$ (kcal/mol) | Population % | A-value (kcal/mol) |
|--------------------------------------|-------------|-------------|--------------------|--------------|--------------------|
| <b>eq-α</b> Rwb97X-V/6-311+G(2df,2p) | -440.414361 | -440.261273 | 0                  | 71.7         | 71.7               |
| <b>ax-β</b> Rwb97X-V/6-311+G(2df,2p) | -440.412932 | -440.260394 | 0.552              | 28.2         | 0.55               |
| <b>ax-α</b> Rwb97X-V/6-311+G(2df,2p) | -440.411091 | -440.254978 | 3.950              | 0.1          | 28.3               |

  

| geometry method             | $E$ (au)    | Thermal correction to Gibbs Free Energy (au/Particle) |  |  |  |
|-----------------------------|-------------|-------------------------------------------------------|--|--|--|
| <b>eq-α</b> RB3LYP/6-31G(d) | -440.382826 | 0.140461                                              |  |  |  |
| <b>ax-β</b> RB3LYP/6-31G(d) | -440.381235 | 0.139718                                              |  |  |  |

**ax- $\alpha$**  RB3LYP/6-31G(d)      -440.380038      0.142699

| energy method                                                   | $E$ (au)    | $G$ (au)    | rel $G$ (kcal/mol) | Population % | A-value (kcal/mol) |
|-----------------------------------------------------------------|-------------|-------------|--------------------|--------------|--------------------|
| <b>eq-<math>\alpha</math></b> RB3LYP-D3/6-311+G(2df,2p)         | -440.559090 | -440.418628 | 0                  | 78.8         | 78.8               |
| <b>ax-<math>\beta</math></b> RB3LYP-D3/6-311+G(2df,2p)          | -440.557098 | -440.417379 | 0.784              | 20.9         | 0.78               |
| <b>ax-<math>\alpha</math></b> RB3LYP-D3/6-311+G(2df,2p)         | -440.556030 | -440.413331 | 3.324              | 0.3          | 21.2               |
| <b>eq-<math>\alpha</math></b> R $\omega$ B97X-D/6-311+G(2df,2p) | -440.401483 | -440.261021 | 0                  | 67.2         | 67.2               |
| <b>ax-<math>\beta</math></b> R $\omega$ B97X-D/6-311+G(2df,2p)  | -440.399621 | -440.259902 | 0.702              | 20.5         | 0.42               |
| <b>ax-<math>\alpha</math></b> R $\omega$ B97X-D/6-311+G(2df,2p) | -440.402127 | -440.259428 | 1.000              | 12.4         | 32.8               |
| <b>eq-<math>\alpha</math></b> RM06-2X/6-311+G(2df,2p)           | -440.342874 | -440.202413 | 0                  | 59.8         | 59.8               |
| <b>ax-<math>\beta</math></b> RM06-2X/6-311+G(2df,2p)            | -440.341752 | -440.202034 | 0.238              | 40.0         | 0.23               |
| <b>ax-<math>\alpha</math></b> RM06-2X /6-311+G(2df,2p)          | -440.339829 | -440.197130 | 3.315              | 0.2          | 40.2               |

| geometry method                             | $E$ (au)    | Thermal correction to Gibbs Free Energy (au/Particle) |
|---------------------------------------------|-------------|-------------------------------------------------------|
| <b>eq-<math>\alpha</math></b> RB3LYP/6-31G* | -440.382826 | 0.130932                                              |
| <b>ax-<math>\beta</math></b> RB3LYP/6-31G*  | -440.381235 | 0.130072                                              |
| <b>ax-<math>\alpha</math></b> RB3LYP/6-31G* | -440.380038 | 0.134244                                              |

| energy method                                                   | $E$ (au)    | $G$ (au)    | rel $G$ (kcal/mol) | Population % | A-value (kcal/mol) |
|-----------------------------------------------------------------|-------------|-------------|--------------------|--------------|--------------------|
| <b>eq-<math>\alpha</math></b> R $\omega$ B97X-V/6-311+G(2df,2p) | -440.415692 | -440.284760 | 0                  | 65.1         | 65.1               |
| <b>ax-<math>\beta</math></b> R $\omega$ B97X-V/6-311+G(2df,2p)  | -440.414243 | -440.284171 | 0.370              | 34.8         | 0.37               |
| <b>ax-<math>\alpha</math></b> R $\omega$ B97X-V/6-311+G(2df,2p) | -440.412530 | -440.278286 | 4.062              | 0.1          | 34.9               |

| geometry method                                  | $E$ (au)    | Thermal correction to Gibbs Free Energy (au/Particle) |
|--------------------------------------------------|-------------|-------------------------------------------------------|
| <b>eq-<math>\alpha</math></b> RB3LYP-D3/6-31G(d) | -440.400738 | 0.141125                                              |
| <b>ax-<math>\beta</math></b> RB3LYP-D3/6-31G(d)  | -440.400304 | 0.140968                                              |
| <b>ax-<math>\alpha</math></b> RB3LYP-D3/6-31G(d) | -440.398956 | 0.143380                                              |

| energy method                                          | $E$ (au)    | $G$ (au)    | rel $G$ (kcal/mol) | Population % | A-value (kcal/mol) |
|--------------------------------------------------------|-------------|-------------|--------------------|--------------|--------------------|
| <b>eq-<math>\alpha</math></b> RM06-2X/6-311+G(2df,2p)  | -440.343013 | -440.201888 | 0                  | 70.7         | 70.7               |
| <b>ax-<math>\beta</math></b> RM06-2X/6-311+G(2df,2p)   | -440.342020 | -440.201053 | 0.524              | 29.1         | 0.52               |
| <b>ax-<math>\alpha</math></b> RM06-2X /6-311+G(2df,2p) | -440.339944 | -440.196564 | 3.341              | 0.2          | 29.3               |

| geometry method                                          | $E$ (au)    | Thermal correction to Gibbs Free Energy (au/Particle) |
|----------------------------------------------------------|-------------|-------------------------------------------------------|
| <b>eq-<math>\alpha</math></b> R $\omega$ B97X-D/6-31G(d) | -440.254573 | 0.142748                                              |



**ax-β** RωB97X-D/6-31G(d) -440.253943 0.143236

**ax-α** RωB97X-D/6-31G(d) -440.252315 0.145165

| energy method                        | E (au)      | G (au)      | rel G (kcal/mol) | Population % | A-value (kcal/mol) |
|--------------------------------------|-------------|-------------|------------------|--------------|--------------------|
| <b>eq-α</b> RωB97X-D/6-311+G(2df,2p) | -440.402499 | -440.259751 | 0                | 92.6         | 92.6               |
| <b>ax-β</b> RωB97X-D/6-311+G(2df,2p) | -440.400586 | -440.257350 | 1.507            | 7.2          | 1.49               |
| <b>ax-α</b> RωB97X-D/6-311+G(2df,2p) | -440.399148 | -440.253983 | 3.620            | 0.2          | 7.4                |
| <b>eq-α</b> RM06-2X/6-311+G(2df,2p)  | -440.344095 | -440.201347 | 0                | 83.8         | 83.8               |
| <b>ax-β</b> RM06-2X/6-311+G(2df,2p)  | -440.343022 | -440.199786 | 0.980            | 16.0         | 0.97               |
| <b>ax-α</b> RM06-2X /6-311+G(2df,2p) | -440.341000 | -440.195835 | 3.459            | 0.2          | 16.2               |

| geometry method             | E (au)      | Thermal correction to Gibbs Free Energy (au/Particle) |
|-----------------------------|-------------|-------------------------------------------------------|
| <b>eq-α</b> RωB97X-D/6-31G* | -440.254573 | 0.131140                                              |
| <b>ax-β</b> RωB97X-D/6-31G* | -440.253943 | 0.131568                                              |
| <b>ax-α</b> RωB97X-D/6-31G* | -440.252315 | 0.134360                                              |

| energy method                        | E (au)      | G (au)      | rel G (kcal/mol) | Population % | A-value (kcal/mol) |
|--------------------------------------|-------------|-------------|------------------|--------------|--------------------|
| <b>eq-α</b> RωB97X-V/6-311+G(2df,2p) | -440.416504 | -440.285364 | 0                | 88.0         | 88.0               |
| <b>ax-β</b> RωB97X-V/6-311+G(2df,2p) | -440.415047 | -440.283479 | 1.183            | 11.9         | 1.18               |
| <b>ax-α</b> RωB97X-V/6-311+G(2df,2p) | -440.413241 | -440.278881 | 4.068            | 0.09         | 12.0               |

| geometry method              | E (au)      | Thermal correction to Gibbs Free Energy (au/Particle) |
|------------------------------|-------------|-------------------------------------------------------|
| <b>eq-α</b> RM06-2X/6-31G(d) | -440.182932 | 0.142426                                              |
| <b>ax-β</b> RM06-2X/6-31G(d) | -440.182942 | 0.142637                                              |
| <b>ax-β</b> RM06-2X/6-31G(d) | -440.183429 | 0.143372                                              |
| <b>ax-α</b> RM06-2X/6-31G(d) | -440.181080 | 0.144956                                              |

| energy method                       | E (au)      | G (au)      | rel G (kcal/mol) | Population % | A-value (kcal/mol) |
|-------------------------------------|-------------|-------------|------------------|--------------|--------------------|
| <b>eq-α</b> RM06-2X/6-311+G(2df,2p) | -440.344321 | -440.201895 | 0                | 43.6         | 94.7               |
| <b>ax-β</b> RM06-2X/6-311+G(2df,2p) | -440.344030 | -440.201392 | 0.315            | 25.6         | 1.71               |
| <b>ax-β</b> RM06-2X/6-311+G(2df,2p) | -440.343258 | -440.199886 | 1.260            | 5.2          | 5.3                |
| <b>ax-α</b> RM06-2X/6-311+G(2df,2p) | -440.341207 | -440.196252 | 3.541            | 0.1          |                    |

| geometry method             | E (au)      | Thermal correction to Gibbs Free Energy (au/Particle) |
|-----------------------------|-------------|-------------------------------------------------------|
| <b>eq-α</b> RωB97X-V/6-31G* | -440.263086 | 0.142148                                              |

|                             |             |          |
|-----------------------------|-------------|----------|
| <b>eq-β</b> RωB97X-V/6-31G* | -440.262902 | 0.142177 |
| <b>ax-β</b> RωB97X-V/6-31G* | -440.263180 | 0.142859 |
| <b>ax-α</b> RωB97X-V/6-31G* | -440.261203 | 0.145468 |

| energy method                        | E (au)      | G (au)      | rel G (kcal/mol) | Population % | A-value (kcal/mol) |
|--------------------------------------|-------------|-------------|------------------|--------------|--------------------|
| <b>eq-α</b> RM06-2X/6-311+G(2df,2p)  | -440.345854 | -440.203706 | 0                | 34.8         | 1.68               |
| <b>ax-β</b> RM06-2X/6-311+G(2df,2p)  | -440.345737 | -440.203560 | 0.092            | 29.8         |                    |
| <b>ax-β</b> RM06-2X/6-311+G(2df,2p)  | -440.344821 | -440.201962 | 1.094            | 5.5          |                    |
| <b>ax-α</b> RM06-2X/6-311+G(2df,2p)  | -440.342719 | -440.197251 | 4.051            | 0.04         |                    |
| <b>eq-α</b> RωB97X-V/6-311+G(2df,2p) | -440.416314 | -440.274166 | 0                | 41.6         | 1.87               |
| <b>eq-β</b> RωB97X-V/6-311+G(2df,2p) | -440.415943 | -440.273766 | 0.251            | 27.2         |                    |
| <b>ax-β</b> RωB97X-V/6-311+G(2df,2p) | -440.414820 | -440.271961 | 1.384            | 4.0          |                    |
| <b>ax-α</b> RωB97X-V/6-311+G(2df,2p) | -440.413038 | -440.267570 | 4.139            | 0.04         |                    |

| geometry method               | E (au)      | Thermal correction to Gibbs Free Energy (au/Particle) |
|-------------------------------|-------------|-------------------------------------------------------|
| <b>eq-α</b> RMP2(FC)/6-31G(d) | -439.007337 | 0.144252                                              |
| <b>ax-β</b> RMP2(FC)/6-31G(d) | -439.006927 | 0.144838                                              |
| <b>ax-α</b> RMP2(FC)/6-31G(d) | -439.005181 | 0.146627                                              |

| energy method                        | E (au)      | G (au)      | rel G (kcal/mol) | Population % | A-value (kcal/mol) |
|--------------------------------------|-------------|-------------|------------------|--------------|--------------------|
| <b>eq-α</b> RM06-2X/6-311+G(2df,2p)  | -440.341345 | -440.197094 | 0                | 85.9         | 1.07               |
| <b>ax-β</b> RM06-2X/6-311+G(2df,2p)  | -440.340217 | -440.195379 | 1.076            | 13.9         |                    |
| <b>ax-α</b> RM06-2X/6-311+G(2df,2p)  | -440.338206 | -440.191579 | 3.461            | 0.2          |                    |
| <b>eq-α</b> MP2(FC)/6-311+G(2df,2p)  | -439.524151 | -439.379900 | 0                | 93.1         | 1.53               |
| <b>ax-β</b> RMP2(FC)/6-311+G(2df,2p) | -439.522270 | -439.377432 | 1.548            | 6.8          |                    |
| <b>ax-α</b> RMP2(FC)/6-311+G(2df,2p) | -439.520650 | -439.374023 | 3.688            | 0.2          |                    |

| geometry method             | E (au)      | Thermal correction to Gibbs Free Energy (au/Particle) |
|-----------------------------|-------------|-------------------------------------------------------|
| <b>eq-α</b> RMP2(FC)/6-31G* | -439.007337 | 0.143550                                              |
| <b>ax-β</b> RMP2(FC)/6-31G* | -439.006927 | 0.144303                                              |
| <b>ax-α</b> RMP2(FC)/6-31G* | -439.005181 | 0.146814                                              |

| energy method                        | E (au)      | G (au)      | rel G (kcal/mol) | Population % | A-value (kcal/mol) |
|--------------------------------------|-------------|-------------|------------------|--------------|--------------------|
| <b>eq-α</b> RωB97X-V/6-311+G(2df,2p) | -440.414282 | -440.270732 | 0                | 92.4         | 1.47               |
| <b>ax-β</b> RωB97X-V/6-311+G(2df,2p) | -440.412679 | -440.268376 | 1.478            | 7.6          |                    |

**ax- $\alpha$**  R $\omega$ B97X-V/6-311+G(2df,2p) -440.410933 -440.264119 4.150 0.08

| geometry method                                              | <i>E</i> (au) | <i>G</i> (au) | rel <i>G</i><br>(kcal/mol) | Population<br>% | A-value<br>(kcal/mol) |
|--------------------------------------------------------------|---------------|---------------|----------------------------|-----------------|-----------------------|
| <b>eq-<math>\alpha</math></b> RHF/6-311+G(d,p)               | -437.805809   | -437.654475   | 0                          | 99.6            | 99.6                  |
| <b>ax-<math>\beta</math></b> RHF/6-311+G(d,p)                | -437.802097   | -437.648753   | 3.591                      | 0.2             | 3.33                  |
| <b>ax-<math>\alpha</math></b> RHF/6-311+G(d,p)               | -437.801648   | -437.648210   | 3.931                      | 0.1             |                       |
| <b>eq-<math>\alpha</math></b> RB3LYP/6-311+G(d,p)            | -440.516654   | -440.378084   | 0                          | 99.2            | 99.2                  |
| <b>ax-<math>\beta</math></b> RB3LYP/6-311+G(d,p)             | -440.513863   | -440.373286   | 3.011                      | 0.6             | 2.85                  |
| <b>ax-<math>\alpha</math></b> RB3LYP/6-311+G(d,p)            | -440.512914   | -440.372181   | 3.704                      | 0.2             |                       |
| <b>eq-<math>\alpha</math></b> RB3LYP-D3/6-311+G(d,p)         | -440.534531   | -440.395297   | 0                          | 87.0            | 87.0                  |
| <b>ax-<math>\beta</math></b> RB3LYP-D3/6-311+G(d,p)          | -440.532811   | -440.391573   | 2.337                      | 1.7             | 1.13                  |
| <b>ax-<math>\alpha</math></b> RB3LYP-D3/6-311+G(d,p)         | -440.532866   | -440.393374   | 1.207                      | 11.3            |                       |
| <b>eq-<math>\alpha</math></b> R $\omega$ B97X-D/6-311+G(d,p) | -440.378192   | -440.237322   | 0                          | 97.9            | 97.9                  |
| <b>ax-<math>\beta</math></b> R $\omega$ B97X-D/6-311+G(d,p)  | -440.376539   | -440.233461   | 2.423                      | 1.6             | 2.28                  |
| <b>ax-<math>\alpha</math></b> R $\omega$ B97X-D/6-311+G(d,p) | -440.375159   | -440.232249   | 3.183                      | 0.4             |                       |
| <b>eq-<math>\alpha</math></b> RM06-2X/6-311+G(d,p)           | -440.318030   | -440.177064   | 0                          | 68.5            | 68.5                  |
| <b>ax-<math>\beta</math></b> RM06-2X/6-311+G(d,p)            | -440.317238   | -440.176325   | 0.464                      | 31.2            | 0.46                  |
| <b>ax-<math>\alpha</math></b> RM06-2X/6-311+G(d,p)           | -440.315285   | -440.171938   | 3.217                      | 0.3             |                       |
| <b>eq-<math>\alpha</math></b> R $\omega$ B97X-V/6-311+G**    | -440.392309   | -440.252051   | 0                          | 73.4            | 0.60                  |
| <b>ax-<math>\beta</math></b> R $\omega$ B97X-V/6-311+G**     | -440.391122   | -440.251097   | 0.599                      | 26.6            |                       |
| <b>eq-<math>\alpha</math></b> RMP2(FC)/6-311+G(d,p)          | -439.288435   | -439.146845   | 0                          | 98.6            | 98.6                  |
| <b>ax-<math>\beta</math></b> RMP2(FC)/6-311+G(d,p)           | -439.286436   | -439.142635   | 2.642                      | 1.1             | 2.52                  |
| <b>ax-<math>\alpha</math></b> RMP2(FC)/6-311+G(d,p)          | -439.285023   | -439.141277   | 3.494                      | 0.3             |                       |

## Methylthiocyclohexane

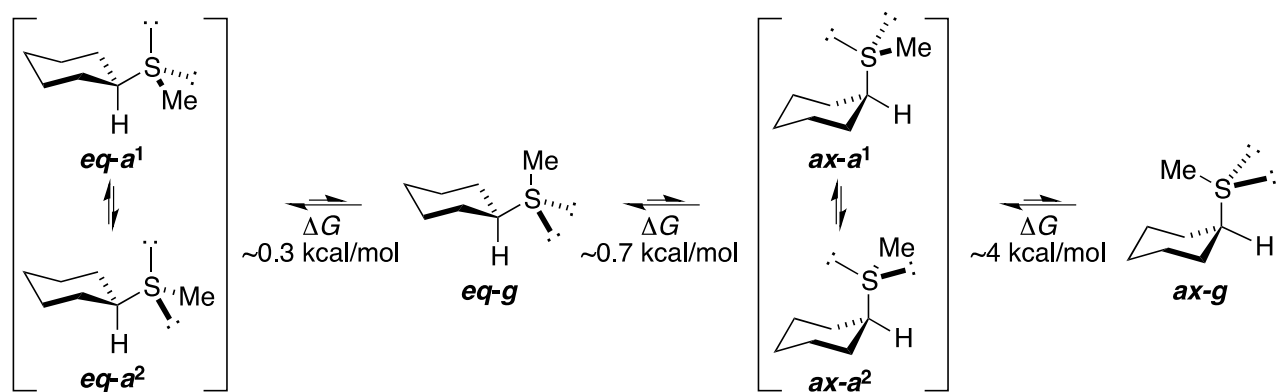

| geometry method          | <i>E</i> (au) | Thermal correction to Gibbs Free Energy (au/Particle) |
|--------------------------|---------------|-------------------------------------------------------|
| <b>eq-a</b> RHF/6-31G(d) | -670.749949   | 0.180240                                              |
| <b>eq-g</b> RHF/6-31G(d) | -670.748567   | 0.180280                                              |
| <b>ax-a</b> RHF/6-31G(d) | -670.747342   | 0.180467                                              |
| <b>ax-g</b> RHF/6-31G(d) | -670.739696   | 0.181004                                              |

| energy method                        | <i>E</i> (au) | <i>G</i> (au) | rel <i>G</i> (kcal/mol) | Population % | A-value (kcal/mol) |
|--------------------------------------|---------------|---------------|-------------------------|--------------|--------------------|
| <b>eq-a</b> Rwb97X-D/6-311+G(2df,2p) | -673.402324   | -673.222084   | 0                       | 34.2         | 92.7               |
| <b>eq-g</b> Rwb97X-D/6-311+G(2df,2p) | -673.402044   | -673.221764   | 0.201                   | 24.3         |                    |
| <b>ax-a</b> Rwb97X-D/6-311+G(2df,2p) | -673.400439   | -673.219973   | 1.325                   | 3.6          | 7.3                |
| <b>ax-g</b> Rwb97X-D/6-311+G(2df,2p) | -673.395433   | -673.214429   | 4.804                   | 0.01         |                    |
| <b>eq-a</b> RM06-2X/6-311+G(2df,2p)  | -673.328778   | -673.148538   | 0                       | 35.9         | 88.1               |
| <b>eq-g</b> RM06-2X /6-311+G(2df,2p) | -673.328083   | -673.147803   | 0.461                   | 16.4         |                    |
| <b>ax-a</b> RM06-2X/6-311+G(2df,2p)  | -673.327311   | -673.146845   | 1.062                   | 5.9          | 11.9               |
| <b>ax-g</b> RM06-2X /6-311+G(2df,2p) | -673.320957   | -673.139954   | 5.387                   | 0.004        |                    |

| geometry method        | <i>E</i> (au) | Thermal correction to Gibbs Free Energy (au/Particle) |
|------------------------|---------------|-------------------------------------------------------|
| <b>eq-a</b> RHF/6-31G* | -670.749949   | 0.179413                                              |
| <b>eq-g</b> RHF/6-31G* | -670.748567   | 0.179493                                              |
| <b>ax-a</b> RHF/6-31G* | -670.747342   | 0.179633                                              |
| <b>ax-g</b> RHF/6-31G* | -670.739696   | 0.180277                                              |

| energy method                        | <i>E</i> (au) | <i>G</i> (au) | rel <i>G</i> (kcal/mol) | Population % | A-value (kcal/mol) |
|--------------------------------------|---------------|---------------|-------------------------|--------------|--------------------|
| <b>eq-a</b> Rwb97X-V/6-311+G(2df,2p) | -673.354397   | -673.174984   | 0                       | 36.4         | 89.5               |
| <b>eq-g</b> Rwb97X-V/6-311+G(2df,2p) | -673.353743   | -673.174250   | 0.461                   | 16.7         |                    |

**ax-a** Rwb97X-V/6-311+G(2df,2p) -673.352793 -673.173160 1.145 5.2  
**ax-g** Rwb97X-V/6-311+G(2df,2p) -673.346664 -673.166387 5.395 0.004 10.5

| geometry method             | <i>E</i> (au) | Thermal correction to Gibbs Free Energy (au/Particle) |  |
|-----------------------------|---------------|-------------------------------------------------------|--|
| <b>eq-a</b> RB3LYP/6-31G(d) | -673.379582   | 0.166070                                              |  |
| <b>eq-g</b> RB3LYP/6-31G(d) | -673.378583   | 0.166183                                              |  |
| <b>ax-a</b> RB3LYP/6-31G(d) | -673.377409   | 0.166279                                              |  |
| <b>ax-g</b> RB3LYP/6-31G(d) | -673.370778   | 0.166405                                              |  |

| energy method                         | <i>E</i> (au) | <i>G</i> (au) | rel <i>G</i> (kcal/mol) | Population % | A-value (kcal/mol) |
|---------------------------------------|---------------|---------------|-------------------------|--------------|--------------------|
| <b>eq-a</b> RB3LYP-D3/6-311+G(2df,2p) | -673.524049   | -673.357978   | 0                       | 34.1         | 90.2               |
| <b>eq-g</b> RB3LYP-D3/6-311+G(2df,2p) | -673.523742   | -673.357560   | 0.263                   | 21.9         |                    |
| <b>ax-a</b> RB3LYP-D3/6-311+G(2df,2p) | -673.522449   | -673.356153   | 1.145                   | 4.9          | 9.8                |
| <b>ax-g</b> RB3LYP-D3/6-311+G(2df,2p) | -673.517003   | -673.350598   | 4.631                   | 0.01         |                    |
| <b>eq-a</b> Rwb97X-D/6-311+G(2df,2p)  | -673.401729   | -673.235658   | 0                       | 34.5         | 92.1               |
| <b>eq-g</b> Rwb97X-D/6-311+G(2df,2p)  | -673.401462   | -673.235280   | 0.237                   | 23.1         |                    |
| <b>ax-a</b> Rwb97X-D/6-311+G(2df,2p)  | -673.399909   | -673.233614   | 1.283                   | 3.9          | 7.9                |
| <b>ax-g</b> Rwb97X-D/6-311+G(2df,2p)  | -673.394821   | -673.228416   | 4.545                   | 0.02         |                    |
| <b>eq-a</b> RM06-2X/6-311+G(2df,2p)   | -673.328114   | -673.162044   | 0                       | 35.6         | 86.8               |
| <b>eq-g</b> RM06-2X /6-311+G(2df,2p)  | -673.327453   | -673.161270   | 0.486                   | 15.6         |                    |
| <b>ax-a</b> RM06-2X/6-311+G(2df,2p)   | -673.326751   | -673.160455   | 0.997                   | 6.6          | 13.2               |
| <b>ax-g</b> RM06-2X /6-311+G(2df,2p)  | -673.320171   | -673.153766   | 5.195                   | 0.005        |                    |

| geometry method           | <i>E</i> (au) | Thermal correction to Gibbs Free Energy (au/Particle) |  |
|---------------------------|---------------|-------------------------------------------------------|--|
| <b>eq-a</b> RB3LYP/6-31G* | -673.379586   | 0.155188                                              |  |
| <b>eq-g</b> RB3LYP/6-31G* | -673.378582   | 0.155297                                              |  |
| <b>ax-a</b> RB3LYP/6-31G* | -673.377399   | 0.155325                                              |  |
| <b>ax-g</b> RB3LYP/6-31G- | -673.370778   | 0.155670                                              |  |

| energy method                        | <i>E</i> (au) | <i>G</i> (au) | rel <i>G</i> (kcal/mol) | Population % | A-value (kcal/mol) |
|--------------------------------------|---------------|---------------|-------------------------|--------------|--------------------|
| <b>eq-a</b> Rwb97X-V/6-311+G(2df,2p) | -673.354379   | -673.199191   | 0                       | 35.8         | 87.7               |
| <b>eq-g</b> Rwb97X-V/6-311+G(2df,2p) | -673.353742   | -673.198445   | 0.468                   | 16.2         |                    |
| <b>ax-a</b> Rwb97X-V/6-311+G(2df,2p) | -673.352856   | -673.197531   | 1.042                   | 6.1          | 12.3               |
| <b>ax-g</b> Rwb97X-V/6-311+G(2df,2p) | -673.346626   | -673.190956   | 5.167                   | 0.006        |                    |

| geometry method                | $E$ (au)    | Thermal correction to Gibbs Free Energy (au/Particle) |  |  |  |
|--------------------------------|-------------|-------------------------------------------------------|--|--|--|
| <b>eq-a</b> RB3LYP-D3/6-31G(d) | -673.398508 | 0.166727                                              |  |  |  |
| <b>eq-g</b> RB3LYP-D3/6-31G(d) | -673.398182 | 0.166788                                              |  |  |  |
| <b>ax-a</b> RB3LYP-D3/6-31G(d) | -673.397321 | 0.167019                                              |  |  |  |
| <b>ax-g</b> RB3LYP-D3/6-31G(d) | -673.391471 | 0.167331                                              |  |  |  |

  

| energy method                        | $E$ (au)    | $G$ (au)    | rel $G$ (kcal/mol) | Population % | A-value (kcal/mol) |
|--------------------------------------|-------------|-------------|--------------------|--------------|--------------------|
| <b>eq-a</b> RM06-2X/6-311+G(2df,2p)  | -673.328275 | -673.161548 | 0                  | 35.2         | 1.16               |
| <b>eq-g</b> RM06-2X /6-311+G(2df,2p) | -673.327665 | -673.160878 | 0.421              | 17.3         |                    |
| <b>ax-a</b> RM06-2X/6-311+G(2df,2p)  | -673.326919 | -673.159901 | 1.034              | 6.1          |                    |
| <b>ax-g</b> RM06-2X /6-311+G(2df,2p) | -673.320825 | -673.153494 | 5.054              | 0.007        |                    |

  

| geometry method               | $E$ (au)    | Thermal correction to Gibbs Free Energy (au/Particle) |  |  |  |
|-------------------------------|-------------|-------------------------------------------------------|--|--|--|
| <b>eq-a</b> RwB97X-D/6-31G(d) | -673.285257 | 0.168493                                              |  |  |  |
| <b>eq-g</b> RwB97X-D/6-31G(d) | -673.284971 | 0.168443                                              |  |  |  |
| <b>ax-a</b> RwB97X-D/6-31G(d) | -673.283777 | 0.168600                                              |  |  |  |
| <b>ax-g</b> RwB97X-D/6-31G(d) | -673.278355 | 0.169478                                              |  |  |  |

  

| energy method                        | $E$ (au)    | $G$ (au)    | rel $G$ (kcal/mol) | Population % | A-value (kcal/mol) |
|--------------------------------------|-------------|-------------|--------------------|--------------|--------------------|
| <b>eq-a</b> RwB97X-D/6-311+G(2df,2p) | -673.402492 | -673.233999 | 0                  | 32.5         | 1.42               |
| <b>eq-g</b> RwB97X-D/6-311+G(2df,2p) | -673.402258 | -673.233815 | 0.116              | 26.7         |                    |
| <b>ax-a</b> RwB97X-D/6-311+G(2df,2p) | -673.400634 | -673.232054 | 1.221              | 4.1          |                    |
| <b>ax-g</b> RwB97X-D/6-311+G(2df,2p) | -673.395771 | -673.226293 | 4.836              | 0.009        |                    |

  

|                                      |             |             |       |       |      |
|--------------------------------------|-------------|-------------|-------|-------|------|
| <b>eq-a</b> RM06-2X/6-311+G(2df,2p)  | -673.329026 | -673.160533 | 0     | 33.8  | 1.06 |
| <b>eq-g</b> RM06-2X /6-311+G(2df,2p) | -673.328397 | -673.159953 | 0.364 | 18.2  |      |
| <b>ax-a</b> RM06-2X/6-311+G(2df,2p)  | -673.327667 | -673.159067 | 0.920 | 7.1   |      |
| <b>ax-g</b> RM06-2X /6-311+G(2df,2p) | -673.321583 | -673.152105 | 5.289 | 0.004 |      |

  

| geometry method             | $E$ (au)    | Thermal correction to Gibbs Free Energy (au/Particle) |  |  |  |
|-----------------------------|-------------|-------------------------------------------------------|--|--|--|
| <b>eq-a</b> RwB97X-D/6-31G* | -673.285259 | 0.155583                                              |  |  |  |
| <b>eq-g</b> RwB97X-D/6-31G* | -673.284971 | 0.155392                                              |  |  |  |
| <b>ax-a</b> RwB97X-D/6-31G* | -673.283778 | 0.155571                                              |  |  |  |
| <b>ax-g</b> RwB97X-D/6-31G- | -673.278359 | 0.156675                                              |  |  |  |

| energy method                                 | $E$ (au)    | $G$ (au)                                              | rel $G$ (kcal/mol) | Population % | A-value (kcal/mol) |
|-----------------------------------------------|-------------|-------------------------------------------------------|--------------------|--------------|--------------------|
| <b>eq-a</b> R $\omega$ B97X-V/6-311+G(2df,2p) | -673.355112 | -673.199529                                           | 0                  | 32.8         | 1.12               |
| <b>eq-g</b> R $\omega$ B97X-V/6-311+G(2df,2p) | -673.354523 | -673.199131                                           | 0.250              | 21.5         |                    |
| <b>ax-a</b> R $\omega$ B97X-V/6-311+G(2df,2p) | -673.353575 | -673.198004                                           | 0.957              | 6.5          |                    |
| <b>ax-g</b> R $\omega$ B97X-V/6-311+G(2df,2p) | -673.347546 | -673.190871                                           | 5.433              | 0.003        |                    |
| -----                                         |             |                                                       |                    |              |                    |
| geometry method                               | $E$ (au)    | Thermal correction to Gibbs Free Energy (au/Particle) |                    |              |                    |
| <b>eq-a</b> R $\omega$ M06-2X/6-31G(d)        | -673.199153 | 0.168061                                              |                    |              |                    |
| <b>eq-g</b> RM06-2X/6-31G(d)                  | -673.198508 | 0.167133                                              |                    |              |                    |
| <b>ax-a</b> RM06-2X/6-31G(d)                  | -673.198120 | 0.167640                                              |                    |              |                    |
| <b>ax-g</b> RM06-2X/6-31G(d)                  | -673.191662 | 0.169624                                              |                    |              |                    |
| -----                                         |             |                                                       |                    |              |                    |
| energy method                                 | $E$ (au)    | $G$ (au)                                              | rel $G$ (kcal/mol) | Population % | A-value (kcal/mol) |
| <b>eq-a</b> RM06-2X/6-311+G(2df,2p)           | -673.329159 | -673.161098                                           | 0.181              | 24.3         | 0.89               |
| <b>eq-g</b> RM06-2X /6-311+G(2df,2p)          | -673.328520 | -673.161387                                           | 0                  | 33.1         |                    |
| <b>ax-a</b> RM06-2X/6-311+G(2df,2p)           | -673.327813 | -673.160173                                           | 0.762              | 9.1          |                    |
| <b>ax-g</b> RM06-2X /6-311+G(2df,2p)          | -673.321870 | -673.152246                                           | 5.736              | 0.002        |                    |
| -----                                         |             |                                                       |                    |              |                    |
| geometry method                               | $E$ (au)    | Thermal correction to Gibbs Free Energy (au/Particle) |                    |              |                    |
| <b>eq-a</b> R $\omega$ B97X-V/6-31G*          | -673.235685 | 0.168085                                              |                    |              |                    |
| <b>eq-g</b> R $\omega$ B97X-V/6-31G*          | -673.235038 | 0.168015                                              |                    |              |                    |
| <b>ax-a</b> R $\omega$ B97X-V/6-31G*          | -673.234629 | 0.168287                                              |                    |              |                    |
| <b>ax-g</b> R $\omega$ B97X-V/6-31G*          | -673.228022 | 0.169251                                              |                    |              |                    |
| -----                                         |             |                                                       |                    |              |                    |
| energy method                                 | $E$ (au)    | $G$ (au)                                              | rel $G$ (kcal/mol) | Population % | A-value (kcal/mol) |
| <b>eq-a</b> RM06-2X/6-311+G(2df,2p)           | -673.330465 | -673.162380                                           | 0                  | 34.1         | 1.15               |
| <b>eq-g</b> RM06-2X/6-311+G(2df,2p)           | -673.329868 | -673.161853                                           | 0.331              | 19.5         |                    |
| <b>ax-a</b> RM06-2X/6-311+G(2df,2p)           | -673.329066 | -673.160779                                           | 1.005              | 6.2          |                    |
| <b>ax-g</b> RM06-2X/6-311+G(2df,2p)           | -673.323139 | -673.153888                                           | 5.329              | 0.004        |                    |
| -----                                         |             |                                                       |                    |              |                    |
| <b>eq-a</b> R $\omega$ B97X-V/6-311+G(2df,2p) | -673.355001 | -673.186916                                           | 0                  | 34.6         | 1.24               |
| <b>eq-g</b> R $\omega$ B97X-V/6-311+G(2df,2p) | -673.354412 | -673.186397                                           | 0.326              | 19.9         |                    |
| <b>ax-a</b> R $\omega$ B97X-V/6-311+G(2df,2p) | -673.353468 | -673.185181                                           | 1.089              | 5.5          |                    |
| <b>ax-g</b> R $\omega$ B97X-V/6-311+G(2df,2p) | -673.347441 | -673.178190                                           | 5.476              | 0.003        |                    |
| -----                                         |             |                                                       |                    |              |                    |
| geometry method                               | $E$ (au)    | Thermal correction to Gibbs Free Energy (au/Particle) |                    |              |                    |

|                               |             |          |
|-------------------------------|-------------|----------|
| <b>eq-a</b> RMP2(FC)/6-31G(d) | -671.791238 | 0.170988 |
| <b>eq-g</b> RMP2(FC)/6-31G(d) | -671.790310 | 0.170858 |
| <b>ax-a</b> RMP2(FC)/6-31G(d) | -671.789715 | 0.171123 |
| <b>ax-g</b> RMP2(FC)/6-31G(d) | -671.781918 | 0.172095 |

| energy method                        | <i>E</i> (au) | <i>G</i> (au) | rel <i>G</i> (kcal/mol) | Population % | A-value (kcal/mol) |
|--------------------------------------|---------------|---------------|-------------------------|--------------|--------------------|
| <b>eq-a</b> RM06-2X/6-311+G(2df,2p)  | -673.329147   | -673.158160   | 0                       | 33.2         | 86.3<br>1.09       |
| <b>eq-g</b> RM06-2X/6-311+G(2df,2p)  | -673.328540   | -673.157681   | 0.300                   | 20.0         |                    |
| <b>ax-a</b> RM06-2X/6-311+G(2df,2p)  | -673.327797   | -673.156674   | 0.932                   | 6.8          |                    |
| <b>ax-g</b> RM06-2X/6-311+G(2df,2p)  | -673.321773   | -673.149679   | 5.322                   | 0.004        |                    |
| <b>eq-a</b> RMP2(FC)/6-311+G(2df,2p) | -672.231545   | -672.060560   | 0                       | 34.1         | 86.9<br>1.12       |
| <b>eq-g</b> RMP2(FC)/6-311+G(2df,2p) | -672.230833   | -672.059974   | 0.368                   | 19.5         |                    |
| <b>ax-a</b> RMP2(FC)/6-311+G(2df,2p) | -672.230128   | -672.059005   | 0.976                   | 6.2          |                    |
| <b>ax-g</b> RMP2(FC)/6-311+G(2df,2p) | -672.223293   | -672.051198   | 5.875                   | 0.004        |                    |

| geometry method             | <i>E</i> (au) | Thermal correction to Gibbs Free Energy (au/Particle) |
|-----------------------------|---------------|-------------------------------------------------------|
| <b>eq-a</b> RMP2(FC)/6-31G* | -671.791238   | 0.170192                                              |
| <b>eq-g</b> RMP2(FC)/6-31G* | -671.790310   | 0.170106                                              |
| <b>ax-a</b> RMP2(FC)/6-31G* | -671.789715   | 0.170347                                              |
| <b>ax-g</b> RMP2(FC)/6-31G* | -671.781918   | 0.171408                                              |

| energy method                        | <i>E</i> (au) | <i>G</i> (au) | rel <i>G</i> (kcal/mol) | Population % | A-value (kcal/mol) |
|--------------------------------------|---------------|---------------|-------------------------|--------------|--------------------|
| <b>eq-a</b> Rwb97X-V/6-311+G(2df,2p) | -673.355176   | -673.184984   | 0                       | 34.3         | 88.7<br>1.22       |
| <b>eq-g</b> Rwb97X-V/6-311+G(2df,2p) | -673.354584   | -673.184478   | 0.318                   | 20.1         |                    |
| <b>ax-a</b> Rwb97X-V/6-311+G(2df,2p) | -673.353631   | -673.183284   | 1.067                   | 5.6          |                    |
| <b>ax-g</b> Rwb97X-V/6-311+G(2df,2p) | -673.347606   | -673.176198   | 5.513                   | 0.003        |                    |

| geometry method                 | <i>E</i> (au) | <i>G</i> (au) | rel <i>G</i> (kcal/mol) | Population % | A-value (kcal/mol) |
|---------------------------------|---------------|---------------|-------------------------|--------------|--------------------|
| <b>eq-a</b> RHF/6-311+G(d,p)    | -670.843248   | -670.665999   | 0                       | 43.8         | 96.7<br>2.00       |
| <b>eq-g</b> RHF/6-311+G(d,p)    | -670.841997   | -670.664513   | 0.932                   | 9.0          |                    |
| <b>ax-a</b> RHF/6-311+G(d,p)    | -670.840398   | -670.662904   | 1.942                   | 1.6          |                    |
| <b>ax-g</b> RHF/6-311+G(d,p)    | -670.833457   | -670.655193   | 6.781                   | 0.0005       |                    |
| <b>eq-a</b> RB3LYP/6-311+G(d,p) | -673.484459   | -673.320747   | 0                       | 40.5         | 94.8<br>1.71       |
| <b>eq-g</b> RB3LYP/6-311+G(d,p) | -673.483572   | -673.319731   | 0.638                   | 13.8         |                    |



|                                    |             |             |       |       |      |      |
|------------------------------------|-------------|-------------|-------|-------|------|------|
| <b>ax-a</b> RB3LYP/6-311+G(d,p)    | -673.482069 | -673.318165 | 1.620 | 2.6   |      |      |
| <b>ax-g</b> RB3LYP/6-311+G(d,p)    | -673.475989 | -673.311779 | 5.627 | 0.003 | 5.2  |      |
| <b>eq-a</b> RB3LYP-D3/6-311+G(d,p) | -673.503369 | -673.338887 | 0     | 32.1  | 88.4 |      |
| <b>eq-g</b> RB3LYP-D3/6-311+G(d,p) | -673.503146 | -673.338620 | 0.168 | 24.2  |      | 1.20 |
| <b>ax-a</b> RB3LYP-D3/6-311+G(d,p) | -673.501945 | -673.337275 | 1.012 | 5.8   | 11.6 |      |
| <b>ax-g</b> RB3LYP-D3/6-311+G(d,p) | -673.496650 | -673.331555 | 4.601 | 0.01  |      |      |
| <b>eq-a</b> RωB97X-D/6-311+G(d,p)  | -673.381974 | -673.215869 | 0.172 | 27.8  | 92.8 |      |
| <b>eq-g</b> RωB97X-D/6-311+G(d,p)  | -673.381850 | -673.216143 | 0     | 37.2  |      | 1.51 |
| <b>ax-a</b> RωB97X-D/6-311+G(d,p)  | -673.380333 | -673.213948 | 1.377 | 3.6   | 7.2  |      |
| <b>ax-g</b> RωB97X-D/6-311+G(d,p)  | -673.375596 | -673.208141 | 5.021 | 0.008 |      |      |
| <b>eq-a</b> RM06-2X/6-311+G(d,p)   | -673.308386 | -673.142208 | 0.253 | 24.4  | 86.1 |      |
| <b>eq-g</b> RM06-2X/6-311+G(d,p)   | -673.307833 | -673.142611 | 0     | 37.4  |      | 1.08 |
| <b>ax-a</b> RM06-2X/6-311+G(d,p)   | -673.307232 | -673.141029 | 0.993 | 7.0   | 13.9 |      |
| <b>ax-g</b> RM06-2X/6-311+G(d,p)   | -673.301391 | -673.133651 | 5.622 | 0.003 |      |      |
| <b>eq-a</b> RωB97X-V/6-311+G**     | -673.335807 | -673.170562 | 0     | 33.7  | 85.4 |      |
| <b>eq-g</b> RωB97X-V/6-311+G**     | -673.335291 | -673.169969 | 0.372 | 18.0  |      | 1.04 |
| <b>ax-a</b> RωB97X-V/6-311+G**     | -673.334500 | -673.169120 | 0.905 | 7.3   | 14.6 |      |
| <b>ax-g</b> RωB97X-V/6-311+G**     | -673.328614 | -673.161997 | 5.375 | 0.004 |      |      |
| <b>eq-a</b> RMP2(FC)/6-311+G(d,p)  | -672.036808 | -671.869597 | 0     | 31.1  | 90.6 |      |
| <b>eq-g</b> RMP2(FC)/6-311+G(d,p)  | -672.036094 | -671.869507 | 0.056 | 2.83  |      | 1.33 |
| <b>ax-a</b> RMP2(FC)/6-311+G(d,p)  | -672.035297 | -671.867822 | 1.114 | 4.7   | 9.4  |      |
| <b>ax-g</b> RMP2(FC)/6-311+G(d,p)  | -672.028501 | -671.860079 | 5.973 | 0.001 |      |      |

## References

1. Frisch, M. J.; Trucks, G. W.; Schlegel, H. B.; Scuseria, G. E.; Robb, M. A.; Cheeseman, J. R.; Scalmani, G.; Barone, V.; Petersson, G. A.; Nakatsuji, H.; Li, X.; Caricato, M.; Marenich, A.; Bloino, J.; Janesko, B. G.; Gomperts, R.; Mennucci, B.; Hratchian, H. P.; Ortiz, J. V.; Izmaylov, A. F.; Sonnenberg, J. L.; Williams-Young, D.; Ding, F.; Lipparini, F.; Egidi, F.; Goings, J.; Peng, B.; Petrone, A.; Henderson, T.; Ranasinghe, D.; Zakrzewski, V. G.; Gao, J.; Rega, N.; Zheng, G.; Liang, W.; Hada, M.; Ehara, M.; Toyota, K.; Fukuda, R.; Hasegawa, J.; Ishida, M.; Nakajima, T.; Honda, Y.; Kitao, O.; Nakai, H.; Vreven, T.; Throssell, K.; Montgomery, Jr., J. A.; Peralta, J. E.; Ogliaro, F.; Bearpark, M.; Heyd, J. J.; Brothers, E.; Kudin, K. N.; Staroverov, V. N.; Keith, T.; Kobayashi, R.; Normand, J.; Raghavachari, K.; Rendell, A.; Burant, J. C.; Iyengar, S. S.; Tomasi, J.; Cossi, M.; Millam, J. M.; Klene, M.; Adamo, C.; Cammi, R.; Ochterski, J. W.; Martin, R. L.; Morokuma, K.; Farkas, O.; Foresman, J. B.; Fox, D. J. Gaussian, Inc., Wallingford CT, 2016.

2. *Spartan'18* Wavefunction, Inc. Irvine, CA.
